# Supplementary material for: Bridged bicyclic peptides as potential drug scaffolds: synthesis, structure, protein binding and stability
Source: PubMed Central journal article supplement (PMC5949603; doi:10.1039/c5sc01699a), 2015-07-13

# Supporting information

## Crystallographic data

**Table S1.** Crystal data and structure refinement for **10** (CCDC 1063797)

|                                   |                                                                                                      |
|-----------------------------------|------------------------------------------------------------------------------------------------------|
| Empirical formula                 | C <sub>36</sub> H <sub>52</sub> N <sub>8</sub> O <sub>9</sub>                                        |
| Formula weight                    | 740.86                                                                                               |
| Temperature                       | 123(2) K                                                                                             |
| Wavelength                        | 0.71073 Å                                                                                            |
| Crystal system                    | Monoclinic                                                                                           |
| Space group                       | I 1 2 1                                                                                              |
| Unit cell dimensions              | a = 16.9971(11) Å    α = 90°.<br>b = 9.2681(4) Å    β = 99.408(6)°.<br>c = 25.8496(17) Å    γ = 90°. |
| Volume                            | 4017.3(4) Å <sup>3</sup>                                                                             |
| Z                                 | 4                                                                                                    |
| Density (calculated)              | 1.225 Mg/m <sup>3</sup>                                                                              |
| Absorption coefficient            | 0.089 mm <sup>-1</sup>                                                                               |
| F(000)                            | 1584                                                                                                 |
| Crystal size                      | 0.2789 x 0.1267 x 0.0162 mm <sup>3</sup>                                                             |
| Theta range for data collection   | 1.56 to 26.56°.                                                                                      |
| Index ranges                      | -20 ≤ h ≤ 21, -11 ≤ k ≤ 11, -31 ≤ l ≤ 30                                                             |
| Reflections collected             | 12542                                                                                                |
| Independent reflections           | 6184 [R(int) = 0.0843]                                                                               |
| Completeness to theta = 25.00°    | 89.3 %                                                                                               |
| Absorption correction             | Semi-empirical from equivalents                                                                      |
| Max. and min. transmission        | 1.00000 and 0.77965                                                                                  |
| Refinement method                 | Full-matrix least-squares on F <sup>2</sup>                                                          |
| Data / restraints / parameters    | 6184 / 5 / 469                                                                                       |
| Goodness-of-fit on F <sup>2</sup> | 0.981                                                                                                |
| Final R indices [I > 2σ(I)]       | R1 = 0.0892, wR2 = 0.2133                                                                            |
| R indices (all data)              | R1 = 0.1457, wR2 = 0.2361                                                                            |
| Absolute structure parameter      | 1(3)                                                                                                 |
| Largest diff. peak and hole       | 0.598 and -0.330 e.Å <sup>-3</sup>                                                                   |

**Table S2.** Atomic coordinates (x 10<sup>4</sup>) and equivalent isotropic displacement parameters (Å<sup>2</sup> × 10<sup>3</sup>) for **10**. U(eq) is defined as one third of the trace of the orthogonalized U<sup>ij</sup> tensor.

|       | x       | y         | z       | U(eq) |
|-------|---------|-----------|---------|-------|
| C(1)  | 6792(8) | 5714(16)  | 9998(4) | 93(5) |
| C(2)  | 6287(7) | 6160(15)  | 9480(3) | 83(4) |
| C(3)  | 6771(5) | 6187(8)   | 9033(3) | 31(2) |
| C(4)  | 6393(4) | 6951(8)   | 8536(3) | 23(2) |
| C(5)  | 6857(4) | 6678(9)   | 8081(3) | 26(2) |
| C(6)  | 6860(4) | 5541(9)   | 7245(3) | 28(2) |
| C(7)  | 6488(4) | 6474(7)   | 6778(3) | 22(2) |
| C(8)  | 5540(5) | 8346(8)   | 6429(3) | 27(2) |
| C(9)  | 5994(5) | 9631(8)   | 6271(3) | 24(2) |
| C(10) | 5547(4) | 10316(8)  | 5757(3) | 26(2) |
| C(11) | 5837(5) | 11812(8)  | 5645(3) | 30(2) |
| C(12) | 5834(5) | 12914(10) | 6087(3) | 36(2) |
| C(13) | 4603(5) | 14010(8)  | 6308(3) | 24(2) |
| C(14) | 3891(5) | 13728(9)  | 6579(3) | 29(2) |
| C(15) | 3260(5) | 12941(10) | 6192(3) | 33(2) |

|        |          |           |         |        |
|--------|----------|-----------|---------|--------|
| C(16)  | 4645(5)  | 13318(8)  | 7441(3) | 24(2)  |
| C(17)  | 4897(4)  | 12294(8)  | 7904(3) | 24(2)  |
| C(18)  | 5790(5)  | 12009(9)  | 7926(3) | 33(2)  |
| C(19)  | 6155(5)  | 10996(8)  | 8386(3) | 29(2)  |
| C(20)  | 6041(5)  | 9432(9)   | 8241(3) | 29(2)  |
| C(21)  | 3790(5)  | 10788(10) | 8075(3) | 32(2)  |
| C(22)  | 3901(5)  | 8302(9)   | 8479(3) | 33(2)  |
| C(23)  | 3802(6)  | 6760(9)   | 8245(3) | 38(2)  |
| C(24)  | 3919(5)  | 7033(8)   | 7690(3) | 34(2)  |
| C(25)  | 3294(4)  | 9018(8)   | 7086(3) | 21(2)  |
| C(26)  | 3343(4)  | 8041(8)   | 6605(3) | 20(2)  |
| C(27)  | 4737(5)  | 8777(8)   | 6583(3) | 20(2)  |
| C(28)  | 2880(5)  | 8707(8)   | 6105(3) | 25(2)  |
| C(29)  | 2848(5)  | 7677(8)   | 5647(3) | 27(2)  |
| C(30)  | 3327(5)  | 7840(9)   | 5276(3) | 30(2)  |
| C(31)  | 3280(5)  | 6960(9)   | 4837(4) | 39(2)  |
| C(32)  | 2762(5)  | 5796(8)   | 4801(3) | 26(2)  |
| C(33)  | 2303(5)  | 5590(9)   | 5171(3) | 32(2)  |
| C(34)  | 2339(5)  | 6504(8)   | 5595(3) | 31(2)  |
| C(35)  | 5544(11) | 5120(20)  | 9360(8) | 166(8) |
| C(36)  | 3467(5)  | 9223(7)   | 8040(3) | 27(2)  |
| N(2)   | 6365(4)  | 8503(6)   | 8644(2) | 25(2)  |
| N(3)   | 5092(4)  | 12887(7)  | 6310(2) | 31(2)  |
| N(4)   | 6529(4)  | 5774(7)   | 7718(2) | 26(2)  |
| N(5)   | 4464(3)  | 10977(6)  | 7862(2) | 21(1)  |
| N(7)   | 4174(3)  | 7777(7)   | 6551(2) | 21(1)  |
| N(11)  | 5982(3)  | 7499(7)   | 6858(2) | 27(2)  |
| N(22)  | 4080(4)  | 12863(7)  | 7057(2) | 29(2)  |
| N(102) | 3592(4)  | 8462(6)   | 7561(2) | 21(1)  |
| O(1)   | 5727(3)  | 8982(6)   | 7821(2) | 29(1)  |
| O(2)   | 4974(3)  | 14529(6)  | 7436(2) | 34(1)  |
| O(3)   | 4633(3)  | 10047(6)  | 6737(2) | 30(1)  |
| O(4)   | 6678(3)  | 6256(6)   | 6345(2) | 33(1)  |
| O(5)   | 2684(3)  | 4873(6)   | 4377(2) | 35(1)  |
| O(6)   | 2968(3)  | 10201(6)  | 7039(2) | 28(1)  |
| O(7)   | 4697(3)  | 15171(6)  | 6115(2) | 33(1)  |
| O(55)  | 3523(4)  | 11713(7)  | 8333(3) | 55(2)  |
| O(101) | 7506(3)  | 7306(6)   | 8083(2) | 37(2)  |

---

**Table S3.** Bond lengths [Å] and angles [°] for **10**

---

| Bond lengths [Å] |           |
|------------------|-----------|
| C(1)-C(2)        | 1.524(12) |
| C(2)-C(3)        | 1.524(11) |
| C(2)-C(35)       | 1.580(15) |
| C(3)-C(4)        | 1.514(9)  |
| C(4)-N(2)        | 1.467(9)  |
| C(4)-C(5)        | 1.540(11) |
| C(5)-O(101)      | 1.247(9)  |
| C(5)-N(4)        | 1.313(9)  |
| C(6)-N(4)        | 1.445(9)  |
| C(6)-C(7)        | 1.534(11) |
| C(7)-O(4)        | 1.233(9)  |
| C(7)-N(11)       | 1.321(9)  |
| C(8)-N(11)       | 1.462(9)  |
| C(8)-C(9)        | 1.511(10) |
| C(8)-C(27)       | 1.536(11) |
| C(9)-C(10)       | 1.553(10) |
| C(10)-C(11)      | 1.516(11) |
| C(11)-C(12)      | 1.533(11) |
| C(12)-N(3)       | 1.472(9)  |
| C(13)-O(7)       | 1.208(8)  |
| C(13)-N(3)       | 1.332(10) |
| C(13)-C(14)      | 1.516(11) |
| C(14)-N(22)      | 1.463(10) |
| C(14)-C(15)      | 1.526(11) |
| C(16)-O(2)       | 1.254(8)  |
| C(16)-N(22)      | 1.333(10) |
| C(16)-C(17)      | 1.532(11) |
| C(17)-N(5)       | 1.420(9)  |
| C(17)-C(18)      | 1.532(11) |
| C(18)-C(19)      | 1.562(11) |
| C(19)-C(20)      | 1.502(11) |
| C(20)-O(1)       | 1.204(9)  |
| C(20)-N(2)       | 1.393(10) |
| C(21)-O(55)      | 1.218(10) |

|              |           |
|--------------|-----------|
| C(21)-N(5)   | 1.361(9)  |
| C(21)-C(36)  | 1.548(11) |
| C(22)-C(36)  | 1.513(11) |
| C(22)-C(23)  | 1.551(12) |
| C(23)-C(24)  | 1.503(12) |
| C(24)-N(102) | 1.454(9)  |
| C(25)-O(6)   | 1.226(8)  |
| C(25)-N(102) | 1.350(9)  |
| C(25)-C(26)  | 1.552(10) |
| C(26)-N(7)   | 1.462(9)  |
| C(26)-C(28)  | 1.529(10) |
| C(27)-O(3)   | 1.265(9)  |
| C(27)-N(7)   | 1.325(9)  |
| C(28)-C(29)  | 1.515(11) |
| C(29)-C(30)  | 1.365(10) |
| C(29)-C(34)  | 1.382(11) |
| C(30)-C(31)  | 1.390(11) |
| C(31)-C(32)  | 1.386(11) |
| C(32)-C(33)  | 1.342(10) |
| C(32)-O(5)   | 1.381(9)  |
| C(33)-C(34)  | 1.379(11) |
| C(36)-N(102) | 1.471(9)  |

## Angles [°]

|                  |           |
|------------------|-----------|
| C(3)-C(2)-C(1)   | 111.9(9)  |
| C(3)-C(2)-C(35)  | 111.9(11) |
| C(1)-C(2)-C(35)  | 109.0(12) |
| C(4)-C(3)-C(2)   | 116.4(7)  |
| N(2)-C(4)-C(3)   | 108.7(6)  |
| N(2)-C(4)-C(5)   | 110.0(6)  |
| C(3)-C(4)-C(5)   | 111.8(6)  |
| O(101)-C(5)-N(4) | 124.9(7)  |
| O(101)-C(5)-C(4) | 118.9(7)  |
| N(4)-C(5)-C(4)   | 116.2(6)  |
| N(4)-C(6)-C(7)   | 114.4(6)  |
| O(4)-C(7)-N(11)  | 122.3(7)  |
| O(4)-C(7)-C(6)   | 119.1(6)  |
| N(11)-C(7)-C(6)  | 118.6(7)  |
| N(11)-C(8)-C(9)  | 114.0(7)  |
| N(11)-C(8)-C(27) | 108.1(6)  |

|                    |          |
|--------------------|----------|
| C(9)-C(8)-C(27)    | 112.3(6) |
| C(8)-C(9)-C(10)    | 110.7(6) |
| C(11)-C(10)-C(9)   | 114.1(6) |
| C(10)-C(11)-C(12)  | 115.2(7) |
| N(3)-C(12)-C(11)   | 112.9(7) |
| O(7)-C(13)-N(3)    | 125.0(7) |
| O(7)-C(13)-C(14)   | 120.9(7) |
| N(3)-C(13)-C(14)   | 114.0(7) |
| N(22)-C(14)-C(13)  | 113.8(6) |
| N(22)-C(14)-C(15)  | 109.0(7) |
| C(13)-C(14)-C(15)  | 107.9(7) |
| O(2)-C(16)-N(22)   | 122.9(7) |
| O(2)-C(16)-C(17)   | 119.6(7) |
| N(22)-C(16)-C(17)  | 117.5(7) |
| N(5)-C(17)-C(18)   | 110.6(6) |
| N(5)-C(17)-C(16)   | 113.4(6) |
| C(18)-C(17)-C(16)  | 106.6(6) |
| C(17)-C(18)-C(19)  | 113.6(7) |
| C(20)-C(19)-C(18)  | 111.8(7) |
| O(1)-C(20)-N(2)    | 121.5(7) |
| O(1)-C(20)-C(19)   | 125.4(7) |
| N(2)-C(20)-C(19)   | 113.0(7) |
| O(55)-C(21)-N(5)   | 122.9(7) |
| O(55)-C(21)-C(36)  | 122.2(7) |
| N(5)-C(21)-C(36)   | 114.2(7) |
| C(36)-C(22)-C(23)  | 102.7(6) |
| C(24)-C(23)-C(22)  | 101.2(6) |
| N(102)-C(24)-C(23) | 105.5(7) |
| O(6)-C(25)-N(102)  | 121.9(7) |
| O(6)-C(25)-C(26)   | 121.6(7) |
| N(102)-C(25)-C(26) | 116.4(6) |
| N(7)-C(26)-C(28)   | 111.0(6) |
| N(7)-C(26)-C(25)   | 110.7(6) |
| C(28)-C(26)-C(25)  | 110.8(6) |
| O(3)-C(27)-N(7)    | 122.2(7) |
| O(3)-C(27)-C(8)    | 120.0(6) |
| N(7)-C(27)-C(8)    | 117.8(6) |
| C(29)-C(28)-C(26)  | 110.8(6) |
| C(30)-C(29)-C(34)  | 117.1(7) |

|                    |          |
|--------------------|----------|
| C(30)-C(29)-C(28)  | 122.0(7) |
| C(34)-C(29)-C(28)  | 120.9(7) |
| C(29)-C(30)-C(31)  | 123.2(8) |
| C(32)-C(31)-C(30)  | 117.5(8) |
| C(33)-C(32)-O(5)   | 119.1(7) |
| C(33)-C(32)-C(31)  | 120.1(7) |
| O(5)-C(32)-C(31)   | 120.8(7) |
| C(32)-C(33)-C(34)  | 121.6(7) |
| C(33)-C(34)-C(29)  | 120.4(7) |
| N(102)-C(36)-C(22) | 104.0(6) |
| N(102)-C(36)-C(21) | 113.6(6) |
| C(22)-C(36)-C(21)  | 111.1(7) |
| C(20)-N(2)-C(4)    | 119.1(6) |
| C(13)-N(3)-C(12)   | 124.0(7) |
| C(5)-N(4)-C(6)     | 121.5(6) |
| C(21)-N(5)-C(17)   | 122.7(7) |
| C(27)-N(7)-C(26)   | 125.2(6) |
| C(7)-N(11)-C(8)    | 122.3(6) |
| C(16)-N(22)-C(14)  | 119.2(7) |
| C(25)-N(102)-C(24) | 129.0(6) |
| C(25)-N(102)-C(36) | 119.8(6) |
| C(24)-N(102)-C(36) | 110.3(6) |

**Table S4.** Anisotropic displacement parameters ( $\text{\AA}^2 \times 10^3$ ) for **10**. The anisotropic displacement factor exponent takes the form:  $-2\pi^2 [ h^2 a^{*2} U^{11} + \dots + 2 h k a^* b^* U^{12} ]$

|       | $U^{11}$ | $U^{22}$ | $U^{33}$ | $U^{23}$ | $U^{13}$ | $U^{12}$ |
|-------|----------|----------|----------|----------|----------|----------|
| C(1)  | 145(12)  | 105(11)  | 21(6)    | 15(6)    | -6(7)    | 3(10)    |
| C(2)  | 121(11)  | 109(10)  | 20(5)    | 36(6)    | 18(6)    | 54(9)    |
| C(3)  | 37(5)    | 14(4)    | 38(5)    | 7(4)     | -1(4)    | 1(4)     |
| C(4)  | 21(4)    | 18(4)    | 25(4)    | -1(4)    | -9(3)    | -6(3)    |
| C(5)  | 18(4)    | 29(5)    | 30(5)    | -10(4)   | -2(3)    | -8(4)    |
| C(6)  | 26(4)    | 28(5)    | 28(5)    | 4(4)     | -2(4)    | -7(4)    |
| C(7)  | 16(4)    | 13(4)    | 40(5)    | 3(4)     | 13(4)    | 4(3)     |
| C(8)  | 39(5)    | 11(4)    | 29(5)    | 6(4)     | 0(4)     | 6(4)     |
| C(9)  | 31(4)    | 13(4)    | 29(4)    | -5(4)    | 5(4)     | -3(3)    |
| C(10) | 27(4)    | 22(4)    | 26(4)    | 1(4)     | 0(4)     | 4(4)     |
| C(11) | 21(4)    | 31(5)    | 38(5)    | 9(4)     | 7(4)     | -1(4)    |

|        |       |       |       |        |       |        |
|--------|-------|-------|-------|--------|-------|--------|
| C(12)  | 36(5) | 37(5) | 36(5) | 5(4)   | 8(4)  | 5(4)   |
| C(13)  | 23(4) | 11(4) | 38(5) | 6(4)   | 4(4)  | -3(3)  |
| C(14)  | 29(5) | 25(5) | 29(5) | 6(4)   | -4(4) | 0(4)   |
| C(15)  | 42(5) | 37(5) | 19(4) | 5(4)   | 1(4)  | 7(4)   |
| C(16)  | 25(4) | 20(4) | 24(4) | -4(4)  | -6(4) | -7(3)  |
| C(17)  | 29(4) | 9(4)  | 31(5) | -5(3)  | -6(4) | 3(3)   |
| C(18)  | 40(5) | 20(4) | 38(5) | -5(4)  | 3(4)  | -10(4) |
| C(19)  | 26(4) | 30(5) | 26(5) | -7(4)  | -8(4) | 12(4)  |
| C(20)  | 33(5) | 29(5) | 23(5) | 5(4)   | 1(4)  | 7(4)   |
| C(21)  | 26(5) | 49(6) | 21(4) | -7(4)  | 2(4)  | -17(4) |
| C(22)  | 35(5) | 41(6) | 21(4) | 1(4)   | -7(4) | -16(4) |
| C(23)  | 44(5) | 33(5) | 34(5) | 20(4)  | 2(4)  | -1(4)  |
| C(24)  | 47(5) | 9(4)  | 42(5) | 8(4)   | -7(4) | 9(4)   |
| C(25)  | 19(4) | 18(4) | 25(4) | -2(4)  | 1(3)  | 4(3)   |
| C(27)  | 27(4) | 11(4) | 22(4) | -3(3)  | 0(3)  | -9(3)  |
| C(28)  | 30(5) | 14(4) | 28(5) | 1(3)   | -7(4) | 6(4)   |
| C(29)  | 36(5) | 16(4) | 29(5) | 5(4)   | 8(4)  | 6(4)   |
| C(30)  | 41(5) | 22(4) | 27(4) | -13(4) | 8(4)  | -10(4) |
| C(31)  | 39(5) | 39(5) | 39(5) | -5(5)  | 10(4) | 0(5)   |
| C(32)  | 35(5) | 27(4) | 15(4) | -9(4)  | -5(4) | -2(4)  |
| C(33)  | 34(5) | 27(5) | 36(5) | -6(4)  | 9(4)  | -18(4) |
| C(34)  | 44(5) | 28(5) | 21(4) | 6(4)   | 7(4)  | -17(4) |
| C(36)  | 40(5) | 12(4) | 29(5) | -7(4)  | 11(4) | -6(4)  |
| N(2)   | 32(4) | 23(4) | 20(3) | -3(3)  | 0(3)  | -1(3)  |
| N(3)   | 40(4) | 17(3) | 35(4) | 6(3)   | 9(3)  | -3(3)  |
| N(4)   | 34(4) | 17(3) | 27(4) | -1(3)  | 7(3)  | -3(3)  |
| N(5)   | 22(3) | 22(3) | 20(3) | -9(3)  | 6(3)  | -4(3)  |
| N(7)   | 19(3) | 22(3) | 19(3) | 4(3)   | -2(3) | 3(3)   |
| N(11)  | 31(4) | 35(4) | 14(3) | 12(3)  | -1(3) | 7(3)   |
| N(22)  | 34(4) | 20(3) | 33(4) | 17(3)  | 2(3)  | 10(3)  |
| N(102) | 22(3) | 16(3) | 24(4) | 5(3)   | 1(3)  | -8(3)  |
| O(1)   | 29(3) | 26(3) | 28(3) | 0(3)   | -7(3) | 2(2)   |
| O(2)   | 23(3) | 22(3) | 52(4) | 0(3)   | -8(3) | 0(3)   |
| O(3)   | 26(3) | 30(3) | 36(3) | -8(3)  | 11(2) | -7(3)  |
| O(4)   | 29(3) | 31(3) | 39(4) | 6(3)   | 9(3)  | 5(3)   |
| O(5)   | 41(3) | 35(3) | 30(3) | -11(3) | 7(3)  | -14(3) |
| O(6)   | 28(3) | 19(3) | 34(3) | -10(3) | 2(2)  | 0(2)   |
| O(7)   | 26(3) | 21(3) | 51(4) | 6(3)   | 7(3)  | 2(3)   |
| O(55)  | 59(4) | 52(4) | 64(5) | -37(4) | 41(4) | -19(3) |



O(101) 33(3) 32(3) 44(4) 7(3) -1(3) -4(3)

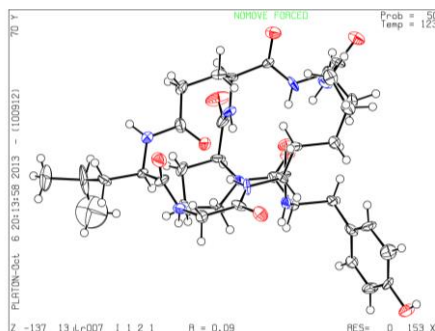

**Table S5.** Crystal data and structure refinement for **12** (CCDC 1063799)

|                                   |                                                                                                                   |
|-----------------------------------|-------------------------------------------------------------------------------------------------------------------|
| Empirical formula                 | C <sub>39</sub> H <sub>64</sub> N <sub>8</sub> O <sub>12</sub>                                                    |
| Formula weight                    | 836.98                                                                                                            |
| Temperature                       | 173(2) K                                                                                                          |
| Wavelength                        | 0.71069 Å                                                                                                         |
| Crystal system                    | Monoclinic                                                                                                        |
| Space group                       | P 21                                                                                                              |
| Unit cell dimensions              | a = 9.769(5) Å      α = 90.000(5)°<br>b = 13.318(5) Å      β = 103.191(5)°<br>c = 17.543(5) Å      γ = 90.000(5)° |
| Volume                            | 2222.2(15) Å <sup>3</sup>                                                                                         |
| Z                                 | 2                                                                                                                 |
| Density (calculated)              | 1.251 Mg/m <sup>3</sup>                                                                                           |
| Absorption coefficient            | 0.093 mm <sup>-1</sup>                                                                                            |
| F(000)                            | 900                                                                                                               |
| Crystal size                      | 0.3124 x 0.1804 x 0.1192 mm <sup>3</sup>                                                                          |
| Theta range for data collection   | 1.939 to 27.235°                                                                                                  |
| Index ranges                      | -12 ≤ h ≤ 12, -16 ≤ k ≤ 16, -21 ≤ l ≤ 21                                                                          |
| Reflections collected             | 17813                                                                                                             |
| Independent reflections           | 8517 [R(int) = 0.0286]                                                                                            |
| Completeness to theta = 25.000°   | 99.8 %                                                                                                            |
| Absorption correction             | Gaussian                                                                                                          |
| Max. and min. transmission        | 1 and 0.786                                                                                                       |
| Refinement method                 | Full-matrix least-squares on F <sup>2</sup>                                                                       |
| Data / restraints / parameters    | 8517 / 1 / 539                                                                                                    |
| Goodness-of-fit on F <sup>2</sup> | 1.039                                                                                                             |
| Final R indices [I > 2σ(I)]       | R1 = 0.0571, wR2 = 0.1425                                                                                         |
| R indices (all data)              | R1 = 0.0658, wR2 = 0.1496                                                                                         |
| Absolute structure parameter      | -0.2(5)                                                                                                           |
| Extinction coefficient            | n/a                                                                                                               |
| Largest diff. peak and hole       | 0.662 and -0.667 e.Å <sup>-3</sup>                                                                                |

**Table S6.** Atomic coordinates (x 10<sup>4</sup>) and equivalent isotropic displacement parameters (Å<sup>2</sup> × 10<sup>3</sup>) for **12**. U(eq) is defined as one third of the trace of the orthogonalized U<sup>ij</sup> tensor.

|      | x        | y       | z       | U(eq) |
|------|----------|---------|---------|-------|
| C(1) | 9374(5)  | -520(3) | 4279(2) | 29(1) |
| C(2) | 10437(5) | 174(3)  | 4580(2) | 28(1) |
| C(3) | 10193(5) | 1190(3) | 4457(2) | 27(1) |

|       |          |         |          |        |
|-------|----------|---------|----------|--------|
| C(4)  | 8910(4)  | 1555(3) | 4028(2)  | 24(1)  |
| C(5)  | 7870(5)  | 858(3)  | 3734(3)  | 31(1)  |
| C(6)  | 8077(5)  | -171(4) | 3861(3)  | 38(1)  |
| C(7)  | 8625(4)  | 2658(3) | 3901(2)  | 24(1)  |
| C(8)  | 9771(4)  | 3249(3) | 3631(2)  | 23(1)  |
| C(9)  | 10179(4) | 2767(3) | 2919(2)  | 22(1)  |
| C(10) | 7821(4)  | 3165(3) | 2006(2)  | 29(1)  |
| C(11) | 7481(5)  | 3144(3) | 1115(3)  | 31(1)  |
| C(12) | 8342(5)  | 2269(4) | 915(3)   | 33(1)  |
| C(13) | 9694(4)  | 2261(3) | 1563(2)  | 25(1)  |
| C(14) | 10935(4) | 2749(3) | 1317(2)  | 25(1)  |
| C(15) | 12327(4) | 4264(3) | 1284(2)  | 25(1)  |
| C(16) | 13710(4) | 4157(3) | 1888(2)  | 26(1)  |
| C(17) | 14914(4) | 3700(3) | 3206(3)  | 29(1)  |
| C(18) | 14703(5) | 2942(4) | 3820(3)  | 43(1)  |
| C(19) | 15417(4) | 4703(3) | 3605(2)  | 29(1)  |
| C(21) | 14790(5) | 6277(4) | 4164(3)  | 36(1)  |
| C(22) | 13709(5) | 7095(4) | 3912(3)  | 35(1)  |
| C(23) | 12229(4) | 6830(3) | 4048(3)  | 29(1)  |
| C(24) | 11058(5) | 6772(3) | 3313(3)  | 28(1)  |
| C(25) | 9874(4)  | 6088(3) | 3427(2)  | 24(1)  |
| C(26) | 10298(4) | 4980(3) | 3410(2)  | 23(1)  |
| C(27) | 7538(5)  | 6847(3) | 2987(3)  | 28(1)  |
| C(28) | 6185(5)  | 6923(4) | 2358(3)  | 36(1)  |
| C(30) | 6783(5)  | 6672(3) | 1102(3)  | 33(1)  |
| C(31) | 6774(4)  | 5948(3) | 436(2)   | 28(1)  |
| C(32) | 5703(5)  | 6256(4) | -305(3)  | 37(1)  |
| C(33) | 5544(7)  | 5487(5) | -949(4)  | 61(2)  |
| C(34) | 4739(7)  | 5923(7) | -1732(4) | 73(2)  |
| C(35) | 9301(5)  | 5612(3) | 828(2)   | 27(1)  |
| C(36) | 4789(13) | 4576(7) | -758(6)  | 142(6) |
| C(45) | 11985(5) | 5392(3) | 1192(3)  | 31(1)  |
| C(48) | 10682(5) | 5645(4) | 564(3)   | 43(1)  |
| N(1)  | 9282(4)  | 2787(2) | 2213(2)  | 24(1)  |
| N(2)  | 11171(3) | 3722(2) | 1483(2)  | 22(1)  |
| N(3)  | 13653(4) | 3780(3) | 2587(2)  | 25(1)  |
| N(4)  | 8180(4)  | 5911(3) | 280(2)   | 31(1)  |
| N(5)  | 6139(4)  | 6340(3) | 1658(2)  | 32(1)  |
| N(6)  | 9358(4)  | 4298(2) | 3520(2)  | 23(1)  |

|       |           |          |          |         |
|-------|-----------|----------|----------|---------|
| N(7)  | 14436(4)  | 5359(3)  | 3692(2)  | 32(1)   |
| N(12) | 8555(4)   | 6248(2)  | 2851(2)  | 26(1)   |
| O(1)  | 9669(4)   | -1506(2) | 4424(2)  | 41(1)   |
| O(2)  | 11347(3)  | 2361(2)  | 3007(2)  | 28(1)   |
| O(3)  | 11470(3)  | 4730(2)  | 3313(2)  | 33(1)   |
| O(4)  | 11678(3)  | 2243(2)  | 986(2)   | 39(1)   |
| O(5)  | 14821(3)  | 4448(2)  | 1739(2)  | 35(1)   |
| O(6)  | 16683(3)  | 4850(3)  | 3857(2)  | 39(1)   |
| O(7)  | 7347(4)   | 7502(3)  | 1144(2)  | 48(1)   |
| O(8)  | 9204(3)   | 5336(2)  | 1479(2)  | 29(1)   |
| O(9)  | 7623(3)   | 7333(2)  | 3598(2)  | 36(1)   |
| C(1S) | 13185(11) | 31(8)    | 3431(6)  | 105(3)  |
| C(2S) | 9690(30)  | 9504(11) | 1959(11) | 307(19) |
| C(3S) | 12330(20) | 8198(11) | 1338(17) | 247(14) |
| O(1S) | 12701(8)  | 565(4)   | 2727(4)  | 103(2)  |
| O(2S) | 9119(10)  | 9100(9)  | 1224(12) | 292(10) |
| O(3S) | 10850(40) | 8298(13) | 664(7)   | 510(30) |

---

**Table S7.** Bond lengths [ $\text{\AA}$ ] and angles [ $^\circ$ ] for **12**.

---

Bond lengths [ $\text{\AA}$ ]

|             |          |
|-------------|----------|
| C(1)-O(1)   | 1.356(5) |
| C(1)-C(6)   | 1.391(7) |
| C(1)-C(2)   | 1.400(6) |
| C(2)-C(3)   | 1.382(6) |
| C(3)-C(4)   | 1.394(6) |
| C(4)-C(5)   | 1.386(6) |
| C(4)-C(7)   | 1.503(6) |
| C(5)-C(6)   | 1.395(6) |
| C(7)-C(8)   | 1.529(6) |
| C(8)-N(6)   | 1.455(5) |
| C(8)-C(9)   | 1.535(5) |
| C(9)-O(2)   | 1.240(5) |
| C(9)-N(1)   | 1.343(5) |
| C(10)-N(1)  | 1.479(6) |
| C(10)-C(11) | 1.522(6) |
| C(11)-C(12) | 1.525(6) |

|             |           |
|-------------|-----------|
| C(12)-C(13) | 1.534(6)  |
| C(13)-N(1)  | 1.471(5)  |
| C(13)-C(14) | 1.523(6)  |
| C(14)-O(4)  | 1.229(5)  |
| C(14)-N(2)  | 1.336(5)  |
| C(15)-N(2)  | 1.449(5)  |
| C(15)-C(16) | 1.522(6)  |
| C(15)-C(45) | 1.539(6)  |
| C(16)-O(5)  | 1.235(5)  |
| C(16)-N(3)  | 1.337(5)  |
| C(17)-N(3)  | 1.449(5)  |
| C(17)-C(18) | 1.524(6)  |
| C(17)-C(19) | 1.535(6)  |
| C(19)-O(6)  | 1.230(5)  |
| C(19)-N(7)  | 1.332(6)  |
| C(21)-N(7)  | 1.472(6)  |
| C(21)-C(22) | 1.511(7)  |
| C(22)-C(23) | 1.559(6)  |
| C(23)-C(24) | 1.518(6)  |
| C(24)-C(25) | 1.520(6)  |
| C(25)-N(12) | 1.460(5)  |
| C(25)-C(26) | 1.534(6)  |
| C(26)-O(3)  | 1.241(5)  |
| C(26)-N(6)  | 1.337(5)  |
| C(27)-O(9)  | 1.239(5)  |
| C(27)-N(12) | 1.337(5)  |
| C(27)-C(28) | 1.520(6)  |
| C(28)-N(5)  | 1.444(6)  |
| C(30)-O(7)  | 1.230(6)  |
| C(30)-N(5)  | 1.350(6)  |
| C(30)-C(31) | 1.515(7)  |
| C(31)-N(4)  | 1.461(5)  |
| C(31)-C(32) | 1.526(6)  |
| C(32)-C(33) | 1.507(8)  |
| C(33)-C(36) | 1.498(12) |
| C(33)-C(34) | 1.532(8)  |
| C(35)-O(8)  | 1.225(5)  |
| C(35)-N(4)  | 1.343(6)  |
| C(35)-C(48) | 1.523(6)  |

|                   |           |
|-------------------|-----------|
| C(45)-C(48)       | 1.520(7)  |
| C(1S)-O(1S)       | 1.411(11) |
| C(2S)-O(2S)       | 1.39(2)   |
| C(3S)-O(3S)       | 1.65(3)   |
| Angles [°]        |           |
| O(1)-C(1)-C(6)    | 123.4(4)  |
| O(1)-C(1)-C(2)    | 117.5(4)  |
| C(6)-C(1)-C(2)    | 119.1(4)  |
| C(3)-C(2)-C(1)    | 120.1(4)  |
| C(2)-C(3)-C(4)    | 121.8(4)  |
| C(5)-C(4)-C(3)    | 117.4(4)  |
| C(5)-C(4)-C(7)    | 120.3(4)  |
| C(3)-C(4)-C(7)    | 122.3(4)  |
| C(4)-C(5)-C(6)    | 122.1(4)  |
| C(1)-C(6)-C(5)    | 119.6(4)  |
| C(4)-C(7)-C(8)    | 115.1(3)  |
| N(6)-C(8)-C(7)    | 109.6(3)  |
| N(6)-C(8)-C(9)    | 114.1(3)  |
| C(7)-C(8)-C(9)    | 112.5(3)  |
| O(2)-C(9)-N(1)    | 120.8(4)  |
| O(2)-C(9)-C(8)    | 118.9(4)  |
| N(1)-C(9)-C(8)    | 120.4(3)  |
| N(1)-C(10)-C(11)  | 102.6(3)  |
| C(10)-C(11)-C(12) | 104.3(4)  |
| C(11)-C(12)-C(13) | 105.2(3)  |
| N(1)-C(13)-C(14)  | 113.1(3)  |
| N(1)-C(13)-C(12)  | 103.3(3)  |
| C(14)-C(13)-C(12) | 113.2(3)  |
| O(4)-C(14)-N(2)   | 122.9(4)  |
| O(4)-C(14)-C(13)  | 119.6(4)  |
| N(2)-C(14)-C(13)  | 117.5(3)  |
| N(2)-C(15)-C(16)  | 113.7(3)  |
| N(2)-C(15)-C(45)  | 110.4(3)  |
| C(16)-C(15)-C(45) | 107.6(3)  |
| O(5)-C(16)-N(3)   | 122.3(4)  |
| O(5)-C(16)-C(15)  | 120.4(4)  |
| N(3)-C(16)-C(15)  | 117.3(4)  |
| N(3)-C(17)-C(18)  | 110.5(4)  |
| N(3)-C(17)-C(19)  | 114.0(3)  |

|                   |          |
|-------------------|----------|
| C(18)-C(17)-C(19) | 109.6(4) |
| O(6)-C(19)-N(7)   | 123.1(4) |
| O(6)-C(19)-C(17)  | 119.5(4) |
| N(7)-C(19)-C(17)  | 117.3(4) |
| N(7)-C(21)-C(22)  | 112.1(4) |
| C(21)-C(22)-C(23) | 113.7(4) |
| C(24)-C(23)-C(22) | 115.3(4) |
| C(23)-C(24)-C(25) | 111.6(4) |
| N(12)-C(25)-C(24) | 113.6(3) |
| N(12)-C(25)-C(26) | 109.1(3) |
| C(24)-C(25)-C(26) | 110.9(3) |
| O(3)-C(26)-N(6)   | 121.5(4) |
| O(3)-C(26)-C(25)  | 121.5(4) |
| N(6)-C(26)-C(25)  | 117.0(3) |
| O(9)-C(27)-N(12)  | 124.1(4) |
| O(9)-C(27)-C(28)  | 118.0(4) |
| N(12)-C(27)-C(28) | 117.9(4) |
| N(5)-C(28)-C(27)  | 115.8(4) |
| O(7)-C(30)-N(5)   | 121.9(5) |
| O(7)-C(30)-C(31)  | 122.8(4) |
| N(5)-C(30)-C(31)  | 115.3(4) |
| N(4)-C(31)-C(30)  | 109.0(4) |
| N(4)-C(31)-C(32)  | 110.0(4) |
| C(30)-C(31)-C(32) | 111.6(4) |
| C(33)-C(32)-C(31) | 112.9(4) |
| C(36)-C(33)-C(32) | 110.8(7) |
| C(36)-C(33)-C(34) | 109.2(6) |
| C(32)-C(33)-C(34) | 111.1(5) |
| O(8)-C(35)-N(4)   | 122.2(4) |
| O(8)-C(35)-C(48)  | 123.7(4) |
| N(4)-C(35)-C(48)  | 114.1(4) |
| C(48)-C(45)-C(15) | 114.7(4) |
| C(45)-C(48)-C(35) | 115.2(4) |
| C(9)-N(1)-C(13)   | 118.0(3) |
| C(9)-N(1)-C(10)   | 128.5(3) |
| C(13)-N(1)-C(10)  | 113.0(3) |
| C(14)-N(2)-C(15)  | 122.4(3) |
| C(16)-N(3)-C(17)  | 120.6(3) |
| C(35)-N(4)-C(31)  | 121.6(4) |

|                   |          |
|-------------------|----------|
| C(30)-N(5)-C(28)  | 120.5(4) |
| C(26)-N(6)-C(8)   | 119.6(3) |
| C(19)-N(7)-C(21)  | 121.7(4) |
| C(27)-N(12)-C(25) | 122.5(4) |

**Table S8.** Anisotropic displacement parameters ( $\text{\AA}^2 \times 10^3$ ) for **12**. The anisotropic displacement factor exponent takes the form:  $-2\pi^2 [ h^2 a^{*2} U^{11} + \dots + 2 h k a^* b^* U^{12} ]$

|       | U <sup>11</sup> | U <sup>22</sup> | U <sup>33</sup> | U <sup>23</sup> | U <sup>13</sup> | U <sup>12</sup> |
|-------|-----------------|-----------------|-----------------|-----------------|-----------------|-----------------|
| C(1)  | 37(3)           | 25(2)           | 24(2)           | 2(2)            | 4(2)            | 2(2)            |
| C(2)  | 29(2)           | 30(2)           | 25(2)           | 7(2)            | 5(2)            | 4(2)            |
| C(3)  | 27(2)           | 30(2)           | 24(2)           | 2(2)            | 4(2)            | -3(2)           |
| C(4)  | 25(2)           | 25(2)           | 22(2)           | 1(2)            | 8(2)            | -1(2)           |
| C(5)  | 25(2)           | 31(2)           | 34(2)           | 0(2)            | -1(2)           | 2(2)            |
| C(6)  | 35(3)           | 30(2)           | 42(3)           | 0(2)            | -3(2)           | -5(2)           |
| C(7)  | 25(2)           | 25(2)           | 24(2)           | 3(2)            | 10(2)           | 1(2)            |
| C(8)  | 23(2)           | 24(2)           | 24(2)           | 2(2)            | 7(2)            | 3(2)            |
| C(9)  | 24(2)           | 17(2)           | 27(2)           | 2(2)            | 9(2)            | -1(2)           |
| C(10) | 25(2)           | 30(2)           | 32(2)           | -5(2)           | 9(2)            | 1(2)            |
| C(11) | 26(2)           | 35(2)           | 29(2)           | -3(2)           | 4(2)            | 1(2)            |
| C(12) | 29(2)           | 37(2)           | 32(2)           | -9(2)           | 5(2)            | -4(2)           |
| C(13) | 27(2)           | 24(2)           | 25(2)           | -5(2)           | 10(2)           | -3(2)           |
| C(14) | 25(2)           | 30(2)           | 21(2)           | -4(2)           | 7(2)            | -2(2)           |
| C(15) | 23(2)           | 30(2)           | 24(2)           | -1(2)           | 10(2)           | -1(2)           |
| C(16) | 24(2)           | 22(2)           | 32(2)           | -4(2)           | 9(2)            | 1(2)            |
| C(17) | 19(2)           | 36(2)           | 30(2)           | 2(2)            | 5(2)            | 4(2)            |
| C(18) | 35(3)           | 48(3)           | 43(3)           | 15(2)           | 5(2)            | 1(2)            |
| C(19) | 23(2)           | 41(2)           | 24(2)           | 3(2)            | 8(2)            | 3(2)            |
| C(21) | 25(2)           | 48(3)           | 36(2)           | -13(2)          | 7(2)            | -3(2)           |
| C(22) | 31(2)           | 34(2)           | 41(3)           | -4(2)           | 14(2)           | -3(2)           |
| C(23) | 26(2)           | 34(2)           | 29(2)           | -5(2)           | 8(2)            | 0(2)            |
| C(24) | 29(2)           | 24(2)           | 31(2)           | 3(2)            | 8(2)            | 0(2)            |
| C(25) | 24(2)           | 25(2)           | 25(2)           | -2(2)           | 7(2)            | -1(2)           |
| C(26) | 24(2)           | 24(2)           | 20(2)           | 0(2)            | 4(2)            | 1(2)            |
| C(27) | 27(2)           | 23(2)           | 36(2)           | 1(2)            | 11(2)           | -4(2)           |
| C(28) | 27(2)           | 41(3)           | 39(3)           | -1(2)           | 7(2)            | 7(2)            |
| C(30) | 26(2)           | 30(2)           | 39(3)           | 7(2)            | 2(2)            | 1(2)            |
| C(31) | 19(2)           | 31(2)           | 32(2)           | 10(2)           | 2(2)            | 0(2)            |

|       |          |         |         |         |          |         |
|-------|----------|---------|---------|---------|----------|---------|
| C(32) | 22(2)    | 45(3)   | 39(3)   | 9(2)    | 0(2)     | 5(2)    |
| C(33) | 54(4)    | 62(4)   | 51(3)   | -11(3)  | -19(3)   | 13(3)   |
| C(34) | 60(4)    | 113(6)  | 40(3)   | -4(3)   | 0(3)     | 30(4)   |
| C(35) | 27(2)    | 25(2)   | 28(2)   | 6(2)    | 4(2)     | 0(2)    |
| C(36) | 194(12)  | 69(5)   | 107(7)  | 10(5)   | -82(8)   | -46(7)  |
| C(45) | 25(2)    | 29(2)   | 40(2)   | 7(2)    | 9(2)     | -3(2)   |
| C(48) | 37(3)    | 51(3)   | 44(3)   | 24(2)   | 15(2)    | 7(2)    |
| N(1)  | 25(2)    | 24(2)   | 24(2)   | -2(1)   | 9(1)     | 1(1)    |
| N(2)  | 22(2)    | 24(2)   | 22(2)   | -1(1)   | 9(1)     | 0(1)    |
| N(3)  | 18(2)    | 32(2)   | 27(2)   | 0(2)    | 7(1)     | 1(1)    |
| N(4)  | 26(2)    | 37(2)   | 29(2)   | 11(2)   | 6(2)     | 3(2)    |
| N(5)  | 22(2)    | 39(2)   | 34(2)   | 2(2)    | 5(2)     | -3(2)   |
| N(6)  | 20(2)    | 23(2)   | 26(2)   | -1(1)   | 9(1)     | 1(1)    |
| N(7)  | 18(2)    | 41(2)   | 36(2)   | -7(2)   | 5(2)     | 0(2)    |
| N(12) | 25(2)    | 24(2)   | 27(2)   | -2(1)   | 2(1)     | 2(1)    |
| O(1)  | 47(2)    | 24(2)   | 47(2)   | 0(1)    | -1(2)    | 4(2)    |
| O(2)  | 27(2)    | 28(2)   | 31(2)   | 4(1)    | 11(1)    | 6(1)    |
| O(3)  | 27(2)    | 27(2)   | 52(2)   | -2(1)   | 21(1)    | 1(1)    |
| O(4)  | 37(2)    | 37(2)   | 50(2)   | -17(2)  | 24(2)    | -6(2)   |
| O(5)  | 23(2)    | 42(2)   | 43(2)   | 9(2)    | 12(1)    | -2(1)   |
| O(6)  | 19(2)    | 50(2)   | 47(2)   | -10(2)  | 4(1)     | 1(2)    |
| O(7)  | 54(2)    | 32(2)   | 59(2)   | 6(2)    | 13(2)    | -8(2)   |
| O(8)  | 27(2)    | 32(2)   | 28(2)   | 7(1)    | 8(1)     | 4(1)    |
| O(9)  | 36(2)    | 30(2)   | 45(2)   | -12(2)  | 14(2)    | 0(1)    |
| C(1S) | 103(7)   | 99(7)   | 116(7)  | 31(6)   | 32(6)    | 31(6)   |
| C(2S) | 470(40)  | 101(10) | 215(17) | -81(11) | -210(20) | 109(16) |
| C(3S) | 310(20)  | 89(9)   | 450(40) | -59(15) | 310(30)  | -52(13) |
| O(1S) | 132(5)   | 70(4)   | 123(5)  | -2(3)   | 60(4)    | 32(4)   |
| O(2S) | 88(6)    | 177(10) | 580(30) | 206(15) | 5(10)    | -56(6)  |
| O(3S) | 1230(80) | 196(15) | 103(9)  | 17(8)   | 180(20)  | 250(30) |

---



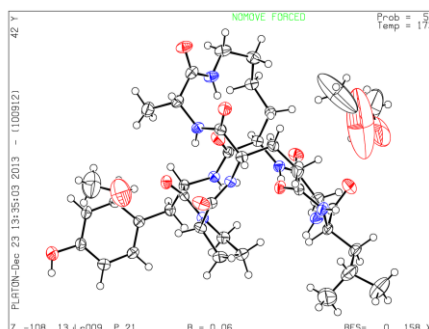

**Table S9.** Crystal data and structure refinement for **13** (CCDC 1063798)

|                                   |                                                                                                      |
|-----------------------------------|------------------------------------------------------------------------------------------------------|
| Empirical formula                 | C <sub>39</sub> H <sub>64</sub> N <sub>8</sub> O <sub>12</sub>                                       |
| Formula weight                    | 836.98                                                                                               |
| Temperature                       | 173(2) K                                                                                             |
| Wavelength                        | 0.71073 Å                                                                                            |
| Crystal system                    | Monoclinic                                                                                           |
| Space group                       | P 21                                                                                                 |
| Unit cell dimensions              | a = 17.7309(7) Å    α = 90°.<br>b = 9.6245(3) Å    β = 107.755(4)°.<br>c = 26.2360(10) Å    γ = 90°. |
| Volume                            | 4263.9(3) Å <sup>3</sup>                                                                             |
| Z                                 | 4                                                                                                    |
| Density (calculated)              | 1.304 Mg/m <sup>3</sup>                                                                              |
| Absorption coefficient            | 0.097 mm <sup>-1</sup>                                                                               |
| F(000)                            | 1800                                                                                                 |
| Crystal size                      | 0.3919 x 0.0532 x 0.0426 mm <sup>3</sup>                                                             |
| Theta range for data collection   | 1.630 to 26.702°.                                                                                    |
| Index ranges                      | -20 ≤ h ≤ 22, -12 ≤ k ≤ 11, -32 ≤ l ≤ 31                                                             |
| Reflections collected             | 40797                                                                                                |
| Independent reflections           | 15995 [R(int) = 0.0729]                                                                              |
| Completeness to theta = 25.000°   | 99.8 %                                                                                               |
| Absorption correction             | Gaussian                                                                                             |
| Max. and min. transmission        | 1 and 0.788                                                                                          |
| Refinement method                 | Full-matrix least-squares on F <sup>2</sup>                                                          |
| Data / restraints / parameters    | 15995 / 20 / 1084                                                                                    |
| Goodness-of-fit on F <sup>2</sup> | 1.066                                                                                                |
| Final R indices [I > 2σ(I)]       | R1 = 0.0918, wR2 = 0.2165                                                                            |
| R indices (all data)              | R1 = 0.1477, wR2 = 0.2530                                                                            |
| Absolute structure parameter      | -1.1(7)                                                                                              |
| Extinction coefficient            | n/a                                                                                                  |
| Largest diff. peak and hole       | 0.567 and -0.542 e.Å <sup>-3</sup>                                                                   |

**Table S10.** Atomic coordinates (x 10<sup>4</sup>) and equivalent isotropic displacement parameters (Å<sup>2</sup> × 10<sup>3</sup>) for **13**. U(eq) is defined as one third of the trace of the orthogonalized U<sup>ij</sup> tensor.

|        | x       | y         | z        | U(eq)  |
|--------|---------|-----------|----------|--------|
| C(015) | 3927(5) | 11868(10) | -433(4)  | 32(2)  |
| C(43)  | 9328(6) | 1084(10)  | 4175(4)  | 38(2)  |
| C(44)  | 8825(6) | 1427(10)  | 4547(4)  | 40(2)  |
| C(62)  | 8554(8) | 7422(10)  | 4443(5)  | 57(3)  |
| C(72)  | 699(9)  | 2883(16)  | 3376(6)  | 93(5)  |
| C(73)  | 2120(9) | 8060(20)  | -1126(5) | 114(8) |
| C(101) | 4284(5) | 11548(10) | -1234(3) | 28(2)  |
| C(102) | 4810(6) | 10495(10) | -982(4)  | 36(2)  |

|        |          |           |         |        |
|--------|----------|-----------|---------|--------|
| C(103) | 3859(6)  | 12201(11) | -957(4) | 38(2)  |
| C(104) | 4886(5)  | 10140(11) | -458(4) | 37(2)  |
| C(106) | 4456(5)  | 10823(10) | -169(3) | 28(2)  |
| C(107) | 4557(5)  | 10445(10) | 399(3)  | 30(2)  |
| C(108) | 4117(5)  | 9093(9)   | 463(3)  | 27(2)  |
| C(109) | 3240(5)  | 9266(11)  | 172(3)  | 31(2)  |
| C(110) | 3321(7)  | 7407(15)  | -478(5) | 73(4)  |
| C(111) | 8897(5)  | 1250(10)  | 3604(4) | 33(2)  |
| C(112) | 2119(7)  | 8783(15)  | -614(4) | 60(3)  |
| C(113) | 1478(7)  | 8294(15)  | -381(4) | 56(3)  |
| C(114) | 1852(5)  | 5163(10)  | 2612(4) | 34(2)  |
| C(115) | 1382(6)  | 6078(12)  | 1726(5) | 44(3)  |
| C(116) | 906(6)   | 5918(11)  | 1156(4) | 45(3)  |
| C(117) | 1412(6)  | 6250(12)  | 773(5)  | 51(3)  |
| C(118) | 1060(6)  | 7280(11)  | 332(4)  | 39(2)  |
| C(119) | 760(6)   | 8607(11)  | 549(4)  | 34(2)  |
| C(120) | 1036(5)  | 10989(10) | 877(4)  | 32(2)  |
| C(121) | 1171(6)  | 12177(11) | 533(4)  | 41(2)  |
| C(122) | 1445(5)  | 11246(10) | 1470(4) | 27(2)  |
| C(123) | 2019(6)  | 10224(10) | 2358(3) | 35(2)  |
| C(124) | 2904(5)  | 10527(10) | 2544(4) | 31(2)  |
| C(125) | 3426(5)  | 9341(10)  | 2469(3) | 31(2)  |
| C(126) | 3394(5)  | 9156(10)  | 1881(4) | 31(2)  |
| C(127) | 3902(5)  | 7928(9)   | 1788(4) | 26(2)  |
| C(128) | 3808(5)  | 7923(9)   | 1193(3) | 25(2)  |
| C(129) | 3676(5)  | 4192(9)   | 2221(4) | 28(2)  |
| C(130) | 2717(6)  | 5009(10)  | 2641(4) | 34(2)  |
| C(131) | 1643(6)  | 4022(11)  | 2973(4) | 44(3)  |
| C(132) | 836(7)   | 4167(14)  | 3060(5) | 58(3)  |
| C(133) | 705(7)   | 5479(15)  | 3320(5) | 70(4)  |
| C(140) | 4068(5)  | 5479(9)   | 2081(3) | 22(2)  |
| C(141) | 2626(11) | 6750(20)  | -925(7) | 119(8) |
| C(201) | 5507(5)  | 6680(10)  | 6212(3) | 27(2)  |
| C(202) | 5996(5)  | 7316(11)  | 5976(4) | 37(2)  |
| C(203) | 5984(5)  | 6984(10)  | 5471(4) | 36(2)  |
| C(204) | 5477(5)  | 5964(10)  | 5166(3) | 29(2)  |
| C(205) | 4983(5)  | 5317(11)  | 5418(4) | 33(2)  |
| C(206) | 4991(5)  | 5645(10)  | 5930(3) | 28(2)  |
| C(207) | 5451(5)  | 5599(10)  | 4608(3) | 32(2)  |

|        |          |           |          |        |
|--------|----------|-----------|----------|--------|
| C(208) | 5951(5)  | 4318(10)  | 4585(3)  | 26(2)  |
| C(209) | 6808(5)  | 4596(10)  | 4912(3)  | 28(2)  |
| C(210) | 6690(6)  | 2930(13)  | 5620(4)  | 51(3)  |
| C(211) | 7358(7)  | 2480(20)  | 6118(6)  | 119(8) |
| C(212) | 7870(7)  | 3744(18)  | 6270(5)  | 82(5)  |
| C(213) | 7885(5)  | 4321(11)  | 5743(3)  | 37(2)  |
| C(214) | 8582(5)  | 3760(11)  | 5587(4)  | 32(2)  |
| C(215) | 9056(5)  | 2686(10)  | 4900(4)  | 31(2)  |
| C(216) | 9289(5)  | 3929(10)  | 4613(4)  | 34(2)  |
| C(217) | 8933(6)  | 6247(10)  | 4225(4)  | 35(2)  |
| C(218) | 8298(5)  | 5121(10)  | 2768(3)  | 31(2)  |
| C(219) | 7408(5)  | 5408(10)  | 2536(3)  | 28(2)  |
| C(220) | 6863(5)  | 4270(10)  | 2629(3)  | 28(2)  |
| C(221) | 6826(5)  | 4236(9)   | 3207(3)  | 26(2)  |
| C(222) | 6331(5)  | 3035(9)   | 3316(3)  | 26(2)  |
| C(223) | 6375(5)  | 3107(10)  | 3903(3)  | 22(2)  |
| C(224) | 6207(5)  | 585(9)    | 3028(3)  | 24(2)  |
| C(225) | 6627(5)  | -693(10)  | 2920(4)  | 33(2)  |
| C(226) | 7678(6)  | 164(10)   | 2580(4)  | 39(2)  |
| C(227) | 8545(5)  | 370(10)   | 2681(4)  | 32(2)  |
| C(228) | 8860(6)  | -706(11)  | 2363(4)  | 44(3)  |
| C(229) | 9704(6)  | -442(13)  | 2357(5)  | 54(3)  |
| C(230) | 9758(7)  | 873(14)   | 2049(6)  | 75(4)  |
| C(231) | 10008(8) | -1666(14) | 2118(6)  | 78(4)  |
| C(232) | 8707(5)  | 6299(10)  | 3619(4)  | 31(2)  |
| N(2)   | 1268(4)  | 9671(8)   | 693(3)   | 28(2)  |
| N(18)  | 1334(4)  | 5142(9)   | 2082(3)  | 36(2)  |
| N(105) | 2883(4)  | 4357(8)   | 2241(3)  | 25(2)  |
| N(110) | 3613(4)  | 6628(8)   | 1948(3)  | 30(2)  |
| N(121) | 4234(4)  | 8862(8)   | 1031(3)  | 26(2)  |
| N(132) | 1654(4)  | 10121(8)  | 1779(3)  | 27(2)  |
| N(201) | 5907(4)  | 4043(8)   | 4029(3)  | 25(2)  |
| N(202) | 8730(4)  | 4919(8)   | 4431(3)  | 29(2)  |
| N(203) | 8437(4)  | 3010(9)   | 5139(3)  | 29(2)  |
| N(204) | 9004(4)  | 325(9)    | 3248(3)  | 35(2)  |
| N(205) | 8576(4)  | 5137(8)   | 3347(3)  | 27(2)  |
| N(206) | 7444(4)  | -508(8)   | 2955(3)  | 30(2)  |
| N(207) | 6650(4)  | 1720(8)   | 3199(3)  | 27(2)  |
| O(101) | 4210(4)  | 11955(8)  | -1749(2) | 35(2)  |

|        |          |          |          |         |
|--------|----------|----------|----------|---------|
| N(112) | 1654(5)  | 7627(9)  | 73(3)    | 41(2)   |
| N(111) | 2937(5)  | 8499(10) | -266(3)  | 43(2)   |
| O(104) | 778(5)   | 8619(13) | -638(3)  | 85(3)   |
| O(105) | 3236(4)  | 5519(8)  | 3029(3)  | 43(2)   |
| O(106) | 1840(4)  | 7095(8)  | 1876(3)  | 48(2)   |
| O(108) | 4755(3)  | 5427(8)  | 2076(2)  | 32(1)   |
| O(109) | 3301(4)  | 7187(8)  | 873(2)   | 34(2)   |
| O(110) | 1523(4)  | 12435(7) | 1647(3)  | 41(2)   |
| O(111) | 99(4)    | 8606(8)  | 600(3)   | 45(2)   |
| O(122) | 2840(3)  | 10145(7) | 324(2)   | 30(1)   |
| O(201) | 5529(4)  | 7072(8)  | 6718(2)  | 33(2)   |
| O(203) | 7208(3)  | 5416(8)  | 4744(2)  | 30(1)   |
| N(211) | 7101(4)  | 3942(8)  | 5379(3)  | 29(2)   |
| O(205) | 9258(4)  | 4009(9)  | 5873(3)  | 46(2)   |
| O(206) | 9940(4)  | 3972(8)  | 4551(3)  | 48(2)   |
| O(207) | 8682(4)  | 7448(7)  | 3402(3)  | 41(2)   |
| O(208) | 6852(3)  | 2401(7)  | 4251(2)  | 31(1)   |
| O(209) | 8423(3)  | 2229(7)  | 3437(3)  | 39(2)   |
| O(210) | 7190(4)  | 626(9)   | 2172(3)  | 48(2)   |
| O(211) | 5491(3)  | 532(7)   | 2957(2)  | 32(1)   |
| C(1S)  | 3201(8)  | 3649(15) | 757(5)   | 72(4)   |
| C(2S)  | 5063(6)  | 7198(11) | 3315(4)  | 50(3)   |
| C(3S)  | 5322(7)  | 1982(12) | 1704(5)  | 55(3)   |
| C(4S)  | 8571(6)  | 9305(12) | 563(5)   | 58(3)   |
| C(5S)  | 6972(6)  | 9539(11) | 4242(5)  | 61(3)   |
| C(6S)  | 726(12)  | 9860(19) | -1734(9) | 300     |
| O(1S)  | 3245(5)  | 2362(10) | 1075(3)  | 67(2)   |
| O(2S)  | 4851(4)  | 5779(7)  | 3322(3)  | 38(2)   |
| O(3S)  | 5525(4)  | 564(8)   | 1660(3)  | 50(2)   |
| O(4S)  | 8284(10) | 8032(17) | 707(7)   | 173(6)  |
| O(5S)  | 7167(8)  | 9317(13) | 4798(7)  | 167(7)  |
| O(6S)  | 167(16)  | 8870(30) | -1621(8) | 341(15) |

---

**Table S11.** Bond lengths [ $\text{\AA}$ ] and angles [ $^\circ$ ] for **13**.

---

Bond lengths [ $\text{\AA}$ ]

C(015)-C(103) 1.381(12)

C(015)-C(106) 1.406(12)

|               |           |
|---------------|-----------|
| C(43)-C(111)  | 1.469(13) |
| C(43)-C(44)   | 1.544(12) |
| C(44)-C(215)  | 1.505(13) |
| C(62)-C(217)  | 1.513(14) |
| C(72)-C(132)  | 1.547(16) |
| C(73)-C(112)  | 1.511(17) |
| C(73)-C(141)  | 1.54(3)   |
| C(101)-C(103) | 1.350(12) |
| C(101)-O(101) | 1.376(10) |
| C(101)-C(102) | 1.399(12) |
| C(102)-C(104) | 1.383(13) |
| C(104)-C(106) | 1.392(12) |
| C(106)-C(107) | 1.493(12) |
| C(107)-C(108) | 1.553(11) |
| C(108)-N(121) | 1.457(11) |
| C(108)-C(109) | 1.517(12) |
| C(109)-O(122) | 1.246(10) |
| C(109)-N(111) | 1.333(11) |
| C(110)-N(111) | 1.452(14) |
| C(110)-C(141) | 1.552(17) |
| C(111)-O(209) | 1.250(10) |
| C(111)-N(204) | 1.345(11) |
| C(112)-N(111) | 1.485(14) |
| C(112)-C(113) | 1.522(14) |
| C(113)-O(104) | 1.259(14) |
| C(113)-N(112) | 1.303(14) |
| C(114)-N(18)  | 1.413(12) |
| C(114)-C(130) | 1.519(12) |
| C(114)-C(131) | 1.568(12) |
| C(115)-O(106) | 1.256(12) |
| C(115)-N(18)  | 1.318(12) |
| C(115)-C(116) | 1.484(15) |
| C(116)-C(117) | 1.572(14) |
| C(117)-C(118) | 1.506(14) |
| C(118)-N(112) | 1.457(11) |
| C(118)-C(119) | 1.556(13) |
| C(119)-O(111) | 1.220(10) |
| C(119)-N(2)   | 1.340(11) |
| C(120)-N(2)   | 1.462(11) |

|               |           |
|---------------|-----------|
| C(120)-C(121) | 1.520(12) |
| C(120)-C(122) | 1.522(12) |
| C(122)-O(110) | 1.227(10) |
| C(122)-N(132) | 1.335(11) |
| C(123)-N(132) | 1.464(11) |
| C(123)-C(124) | 1.523(12) |
| C(124)-C(125) | 1.520(12) |
| C(125)-C(126) | 1.535(12) |
| C(126)-C(127) | 1.551(11) |
| C(127)-N(110) | 1.462(10) |
| C(127)-C(128) | 1.517(12) |
| C(128)-O(109) | 1.248(10) |
| C(128)-N(121) | 1.329(10) |
| C(129)-N(105) | 1.431(10) |
| C(129)-C(140) | 1.520(10) |
| C(130)-O(105) | 1.245(11) |
| C(130)-N(105) | 1.332(11) |
| C(131)-C(132) | 1.523(14) |
| C(132)-C(133) | 1.486(16) |
| C(140)-O(108) | 1.224(9)  |
| C(140)-N(110) | 1.350(10) |
| C(201)-C(202) | 1.354(12) |
| C(201)-O(201) | 1.371(10) |
| C(201)-C(206) | 1.401(12) |
| C(202)-C(203) | 1.356(13) |
| C(203)-C(204) | 1.404(13) |
| C(204)-C(205) | 1.394(12) |
| C(204)-C(207) | 1.493(12) |
| C(205)-C(206) | 1.374(12) |
| C(207)-C(208) | 1.531(11) |
| C(208)-N(201) | 1.462(10) |
| C(208)-C(209) | 1.524(12) |
| C(209)-O(203) | 1.231(10) |
| C(209)-N(211) | 1.333(11) |
| C(210)-N(211) | 1.471(12) |
| C(210)-C(211) | 1.534(15) |
| C(211)-C(212) | 1.50(2)   |
| C(212)-C(213) | 1.498(15) |
| C(213)-N(211) | 1.472(11) |

|               |           |
|---------------|-----------|
| C(213)-C(214) | 1.517(12) |
| C(214)-O(205) | 1.229(10) |
| C(214)-N(203) | 1.334(11) |
| C(215)-N(203) | 1.454(11) |
| C(215)-C(216) | 1.536(12) |
| C(216)-O(206) | 1.215(10) |
| C(216)-N(202) | 1.352(11) |
| C(217)-N(202) | 1.474(11) |
| C(217)-C(232) | 1.517(13) |
| C(218)-N(205) | 1.446(11) |
| C(218)-C(219) | 1.533(12) |
| C(219)-C(220) | 1.528(11) |
| C(220)-C(221) | 1.537(11) |
| C(221)-C(222) | 1.530(11) |
| C(222)-N(207) | 1.457(10) |
| C(222)-C(223) | 1.520(11) |
| C(223)-O(208) | 1.241(10) |
| C(223)-N(201) | 1.332(10) |
| C(224)-O(211) | 1.228(9)  |
| C(224)-N(207) | 1.340(10) |
| C(224)-C(225) | 1.509(11) |
| C(225)-N(206) | 1.434(11) |
| C(226)-O(210) | 1.236(11) |
| C(226)-N(206) | 1.344(11) |
| C(226)-C(227) | 1.492(13) |
| C(227)-N(204) | 1.462(12) |
| C(227)-C(228) | 1.538(12) |
| C(228)-C(229) | 1.524(14) |
| C(229)-C(231) | 1.509(15) |
| C(229)-C(230) | 1.519(16) |
| C(232)-O(207) | 1.238(10) |
| C(232)-N(205) | 1.309(11) |
| C(1S)-O(1S)   | 1.483(15) |
| C(2S)-O(2S)   | 1.418(11) |
| C(3S)-O(3S)   | 1.425(12) |
| C(4S)-O(4S)   | 1.421(11) |
| C(5S)-O(5S)   | 1.410(18) |
| C(6S)-O(6S)   | 1.465(13) |

Angles [°]

|                      |           |
|----------------------|-----------|
| C(103)-C(015)-C(106) | 119.9(8)  |
| C(111)-C(43)-C(44)   | 113.6(8)  |
| C(215)-C(44)-C(43)   | 117.4(7)  |
| C(112)-C(73)-C(141)  | 103.3(12) |
| C(103)-C(101)-O(101) | 119.6(8)  |
| C(103)-C(101)-C(102) | 119.0(8)  |
| O(101)-C(101)-C(102) | 121.4(8)  |
| C(104)-C(102)-C(101) | 119.8(9)  |
| C(101)-C(103)-C(015) | 122.3(9)  |
| C(102)-C(104)-C(106) | 121.3(9)  |
| C(104)-C(106)-C(015) | 117.7(8)  |
| C(104)-C(106)-C(107) | 120.6(8)  |
| C(015)-C(106)-C(107) | 121.7(8)  |
| C(106)-C(107)-C(108) | 113.6(7)  |
| N(121)-C(108)-C(109) | 109.7(7)  |
| N(121)-C(108)-C(107) | 108.6(6)  |
| C(109)-C(108)-C(107) | 109.0(7)  |
| O(122)-C(109)-N(111) | 122.2(9)  |
| O(122)-C(109)-C(108) | 120.6(7)  |
| N(111)-C(109)-C(108) | 117.1(8)  |
| N(111)-C(110)-C(141) | 103.1(11) |
| O(209)-C(111)-N(204) | 118.6(9)  |
| O(209)-C(111)-C(43)  | 121.6(8)  |
| N(204)-C(111)-C(43)  | 119.9(8)  |
| N(111)-C(112)-C(73)  | 101.3(11) |
| N(111)-C(112)-C(113) | 113.9(9)  |
| C(73)-C(112)-C(113)  | 114.8(10) |
| O(104)-C(113)-N(112) | 122.4(9)  |
| O(104)-C(113)-C(112) | 116.2(11) |
| N(112)-C(113)-C(112) | 121.3(11) |
| N(18)-C(114)-C(130)  | 113.1(7)  |
| N(18)-C(114)-C(131)  | 112.4(7)  |
| C(130)-C(114)-C(131) | 108.8(8)  |
| O(106)-C(115)-N(18)  | 119.1(10) |
| O(106)-C(115)-C(116) | 120.7(9)  |
| N(18)-C(115)-C(116)  | 120.2(9)  |
| C(115)-C(116)-C(117) | 111.3(8)  |
| C(118)-C(117)-C(116) | 116.2(8)  |
| N(112)-C(118)-C(117) | 108.7(8)  |



|                      |           |
|----------------------|-----------|
| N(112)-C(118)-C(119) | 111.0(8)  |
| C(117)-C(118)-C(119) | 111.6(8)  |
| O(111)-C(119)-N(2)   | 123.7(9)  |
| O(111)-C(119)-C(118) | 119.1(8)  |
| N(2)-C(119)-C(118)   | 117.1(8)  |
| N(2)-C(120)-C(121)   | 110.2(7)  |
| N(2)-C(120)-C(122)   | 112.6(7)  |
| C(121)-C(120)-C(122) | 111.8(8)  |
| O(110)-C(122)-N(132) | 123.2(8)  |
| O(110)-C(122)-C(120) | 120.2(8)  |
| N(132)-C(122)-C(120) | 116.5(7)  |
| N(132)-C(123)-C(124) | 115.5(7)  |
| C(125)-C(124)-C(123) | 115.1(7)  |
| C(124)-C(125)-C(126) | 112.3(7)  |
| C(125)-C(126)-C(127) | 113.7(7)  |
| N(110)-C(127)-C(128) | 110.8(7)  |
| N(110)-C(127)-C(126) | 109.6(6)  |
| C(128)-C(127)-C(126) | 106.2(7)  |
| O(109)-C(128)-N(121) | 122.2(8)  |
| O(109)-C(128)-C(127) | 121.7(7)  |
| N(121)-C(128)-C(127) | 115.6(7)  |
| N(105)-C(129)-C(140) | 116.4(7)  |
| O(105)-C(130)-N(105) | 123.0(8)  |
| O(105)-C(130)-C(114) | 119.0(8)  |
| N(105)-C(130)-C(114) | 117.9(8)  |
| C(132)-C(131)-C(114) | 115.6(9)  |
| C(133)-C(132)-C(131) | 115.6(9)  |
| C(133)-C(132)-C(72)  | 111.2(10) |
| C(131)-C(132)-C(72)  | 108.4(11) |
| O(108)-C(140)-N(110) | 123.3(7)  |
| O(108)-C(140)-C(129) | 120.0(7)  |
| N(110)-C(140)-C(129) | 116.7(7)  |
| C(73)-C(141)-C(110)  | 100.0(12) |
| C(202)-C(201)-O(201) | 119.0(8)  |
| C(202)-C(201)-C(206) | 119.1(8)  |
| O(201)-C(201)-C(206) | 121.9(8)  |
| C(201)-C(202)-C(203) | 121.1(9)  |
| C(202)-C(203)-C(204) | 122.5(9)  |
| C(205)-C(204)-C(203) | 115.3(8)  |

|                      |           |
|----------------------|-----------|
| C(205)-C(204)-C(207) | 121.6(8)  |
| C(203)-C(204)-C(207) | 123.1(8)  |
| C(206)-C(205)-C(204) | 122.6(9)  |
| C(205)-C(206)-C(201) | 119.3(8)  |
| C(204)-C(207)-C(208) | 112.5(7)  |
| N(201)-C(208)-C(209) | 109.6(6)  |
| N(201)-C(208)-C(207) | 109.3(6)  |
| C(209)-C(208)-C(207) | 109.1(7)  |
| O(203)-C(209)-N(211) | 121.8(8)  |
| O(203)-C(209)-C(208) | 119.7(8)  |
| N(211)-C(209)-C(208) | 118.6(8)  |
| N(211)-C(210)-C(211) | 101.4(9)  |
| C(212)-C(211)-C(210) | 104.2(11) |
| C(213)-C(212)-C(211) | 103.6(11) |
| N(211)-C(213)-C(212) | 103.2(9)  |
| N(211)-C(213)-C(214) | 115.0(7)  |
| C(212)-C(213)-C(214) | 111.3(8)  |
| O(205)-C(214)-N(203) | 122.3(8)  |
| O(205)-C(214)-C(213) | 119.3(8)  |
| N(203)-C(214)-C(213) | 118.4(8)  |
| N(203)-C(215)-C(44)  | 109.9(7)  |
| N(203)-C(215)-C(216) | 113.3(7)  |
| C(44)-C(215)-C(216)  | 112.8(7)  |
| O(206)-C(216)-N(202) | 123.5(9)  |
| O(206)-C(216)-C(215) | 120.1(9)  |
| N(202)-C(216)-C(215) | 116.4(8)  |
| N(202)-C(217)-C(62)  | 108.9(8)  |
| N(202)-C(217)-C(232) | 113.3(7)  |
| C(62)-C(217)-C(232)  | 111.4(8)  |
| N(205)-C(218)-C(219) | 113.2(7)  |
| C(220)-C(219)-C(218) | 115.6(7)  |
| C(219)-C(220)-C(221) | 113.0(7)  |
| C(222)-C(221)-C(220) | 113.5(7)  |
| N(207)-C(222)-C(223) | 110.5(7)  |
| N(207)-C(222)-C(221) | 109.6(6)  |
| C(223)-C(222)-C(221) | 107.5(6)  |
| O(208)-C(223)-N(201) | 121.6(7)  |
| O(208)-C(223)-C(222) | 122.2(7)  |
| N(201)-C(223)-C(222) | 116.1(7)  |

|                      |           |
|----------------------|-----------|
| O(211)-C(224)-N(207) | 123.9(7)  |
| O(211)-C(224)-C(225) | 119.0(7)  |
| N(207)-C(224)-C(225) | 117.1(7)  |
| N(206)-C(225)-C(224) | 115.7(7)  |
| O(210)-C(226)-N(206) | 121.1(9)  |
| O(210)-C(226)-C(227) | 121.2(8)  |
| N(206)-C(226)-C(227) | 117.7(9)  |
| N(204)-C(227)-C(226) | 113.6(7)  |
| N(204)-C(227)-C(228) | 110.5(7)  |
| C(226)-C(227)-C(228) | 109.9(8)  |
| C(229)-C(228)-C(227) | 114.5(9)  |
| C(231)-C(229)-C(230) | 110.0(9)  |
| C(231)-C(229)-C(228) | 110.5(10) |
| C(230)-C(229)-C(228) | 111.4(9)  |
| O(207)-C(232)-N(205) | 122.4(9)  |
| O(207)-C(232)-C(217) | 118.2(8)  |
| N(205)-C(232)-C(217) | 119.3(7)  |
| C(119)-N(2)-C(120)   | 121.6(7)  |
| C(115)-N(18)-C(114)  | 121.6(8)  |
| C(130)-N(105)-C(129) | 122.5(8)  |
| C(140)-N(110)-C(127) | 122.7(7)  |
| C(128)-N(121)-C(108) | 121.0(7)  |
| C(122)-N(132)-C(123) | 121.9(7)  |
| C(223)-N(201)-C(208) | 121.5(7)  |
| C(216)-N(202)-C(217) | 120.5(7)  |
| C(214)-N(203)-C(215) | 121.7(8)  |
| C(111)-N(204)-C(227) | 122.3(7)  |
| C(232)-N(205)-C(218) | 122.0(7)  |
| C(226)-N(206)-C(225) | 123.0(8)  |
| C(224)-N(207)-C(222) | 123.6(7)  |
| C(113)-N(112)-C(118) | 122.2(9)  |
| C(109)-N(111)-C(110) | 128.2(9)  |
| C(109)-N(111)-C(112) | 119.3(9)  |
| C(110)-N(111)-C(112) | 112.4(8)  |
| C(209)-N(211)-C(210) | 127.0(7)  |
| C(209)-N(211)-C(213) | 120.4(8)  |
| C(210)-N(211)-C(213) | 112.3(7)  |

---

**Table S12.** Anisotropic displacement parameters ( $\text{\AA}^2 \times 10^3$ ) for **13**. The anisotropic displacement factor exponent takes

the form:  $-2\pi^2[ h^2 a^{*2} U^{11} + \dots + 2 h k a^* b^* U^{12} ]$

|        | U <sup>11</sup> | U <sup>22</sup> | U <sup>33</sup> | U <sup>23</sup> | U <sup>13</sup> | U <sup>12</sup> |
|--------|-----------------|-----------------|-----------------|-----------------|-----------------|-----------------|
| C(015) | 35(5)           | 33(5)           | 33(6)           | 3(4)            | 18(4)           | 6(4)            |
| C(43)  | 36(6)           | 24(5)           | 59(7)           | -3(4)           | 22(5)           | 4(4)            |
| C(44)  | 38(6)           | 23(5)           | 69(7)           | -1(4)           | 34(5)           | 1(4)            |
| C(62)  | 87(9)           | 18(5)           | 68(8)           | -6(5)           | 27(7)           | -4(5)           |
| C(72)  | 120(13)         | 96(11)          | 86(11)          | -6(8)           | 63(10)          | -59(10)         |
| C(73)  | 82(12)          | 230(20)         | 33(8)           | -50(12)         | 23(8)           | -79(14)         |
| C(101) | 27(5)           | 29(5)           | 26(5)           | 0(4)            | 4(4)            | -11(4)          |
| C(102) | 45(6)           | 29(5)           | 38(6)           | 3(4)            | 16(5)           | 1(4)            |
| C(103) | 36(6)           | 41(5)           | 41(6)           | 6(5)            | 17(5)           | 8(4)            |
| C(104) | 37(5)           | 35(5)           | 38(6)           | 9(4)            | 11(5)           | 6(4)            |
| C(106) | 27(5)           | 25(4)           | 33(5)           | -4(4)           | 9(4)            | -6(4)           |
| C(107) | 28(5)           | 32(5)           | 31(5)           | 0(4)            | 11(4)           | -9(4)           |
| C(108) | 25(5)           | 19(4)           | 39(5)           | -3(4)           | 13(4)           | -6(3)           |
| C(109) | 31(5)           | 41(5)           | 25(5)           | -7(4)           | 13(4)           | -16(4)          |
| C(110) | 68(8)           | 95(10)          | 67(9)           | -61(8)          | 39(7)           | -36(7)          |
| C(111) | 29(5)           | 14(4)           | 61(7)           | 2(4)            | 22(5)           | -2(4)           |
| C(112) | 53(7)           | 102(10)         | 21(6)           | -11(6)          | 5(5)            | -27(7)          |
| C(113) | 43(7)           | 105(10)         | 25(6)           | -29(6)          | 17(5)           | -40(7)          |
| C(114) | 31(5)           | 28(5)           | 45(6)           | -8(4)           | 16(5)           | -5(4)           |
| C(115) | 29(6)           | 46(6)           | 70(8)           | -3(5)           | 31(5)           | 9(5)            |
| C(116) | 29(5)           | 41(6)           | 66(8)           | 18(5)           | 13(5)           | -3(4)           |
| C(117) | 43(6)           | 36(6)           | 80(9)           | -1(5)           | 27(6)           | -4(5)           |
| C(118) | 36(5)           | 50(6)           | 36(6)           | -15(5)          | 17(5)           | -11(5)          |
| C(119) | 35(6)           | 40(5)           | 28(5)           | -11(4)          | 11(4)           | -8(4)           |
| C(120) | 30(5)           | 30(5)           | 36(5)           | -4(4)           | 9(4)            | 5(4)            |
| C(121) | 43(6)           | 37(5)           | 40(6)           | 14(4)           | 8(5)            | 4(5)            |
| C(122) | 19(4)           | 28(5)           | 38(5)           | -5(4)           | 13(4)           | -2(4)           |
| C(123) | 53(6)           | 29(5)           | 27(5)           | -2(4)           | 19(4)           | 7(4)            |
| C(124) | 38(5)           | 26(5)           | 28(5)           | -2(4)           | 9(4)            | -2(4)           |
| C(125) | 37(5)           | 29(5)           | 28(5)           | -1(4)           | 10(4)           | 1(4)            |
| C(126) | 36(5)           | 23(4)           | 38(5)           | 0(4)            | 16(4)           | 2(4)            |
| C(127) | 28(5)           | 16(4)           | 41(5)           | 2(4)            | 20(4)           | -3(3)           |
| C(128) | 32(5)           | 13(4)           | 30(5)           | 0(3)            | 8(4)            | 1(4)            |
| C(129) | 30(5)           | 22(4)           | 31(5)           | -2(4)           | 9(4)            | -3(4)           |
| C(130) | 37(6)           | 29(5)           | 42(6)           | 3(4)            | 17(5)           | -10(4)          |

|        |         |         |         |          |        |          |
|--------|---------|---------|---------|----------|--------|----------|
| C(131) | 52(7)   | 35(5)   | 54(7)   | -1(5)    | 28(5)  | -10(5)   |
| C(132) | 40(6)   | 81(9)   | 59(7)   | -4(6)    | 26(6)  | -25(6)   |
| C(133) | 49(7)   | 91(10)  | 89(10)  | -21(8)   | 50(7)  | -10(7)   |
| C(140) | 25(4)   | 12(4)   | 33(5)   | -2(3)    | 16(4)  | -6(3)    |
| C(141) | 130(16) | 159(17) | 98(13)  | -106(13) | 80(12) | -102(14) |
| C(201) | 24(5)   | 29(5)   | 27(5)   | -6(4)    | 5(4)   | 7(4)     |
| C(202) | 30(5)   | 41(5)   | 41(6)   | -9(5)    | 14(5)  | -4(4)    |
| C(203) | 33(5)   | 34(5)   | 46(6)   | -4(4)    | 18(5)  | -3(4)    |
| C(204) | 28(5)   | 28(5)   | 30(5)   | 5(4)     | 8(4)   | 14(4)    |
| C(205) | 30(5)   | 32(5)   | 39(6)   | -6(4)    | 13(4)  | 1(4)     |
| C(206) | 24(5)   | 27(4)   | 36(6)   | -3(4)    | 13(4)  | 4(4)     |
| C(207) | 29(5)   | 35(5)   | 30(5)   | -2(4)    | 8(4)   | 10(4)    |
| C(208) | 23(5)   | 26(4)   | 29(5)   | 6(4)     | 10(4)  | 6(4)     |
| C(209) | 25(5)   | 31(5)   | 30(5)   | -5(4)    | 11(4)  | 8(4)     |
| C(210) | 31(6)   | 71(7)   | 51(7)   | 41(6)    | 10(5)  | 10(5)    |
| C(211) | 32(7)   | 240(20) | 96(11)  | 130(13)  | 29(7)  | 39(10)   |
| C(212) | 32(7)   | 170(15) | 45(8)   | 31(9)    | 16(6)  | 28(9)    |
| C(213) | 35(6)   | 52(6)   | 19(5)   | -11(4)   | 1(4)   | 5(5)     |
| C(214) | 29(5)   | 38(5)   | 29(5)   | 6(4)     | 9(4)   | -1(4)    |
| C(215) | 30(5)   | 33(5)   | 32(5)   | 12(4)    | 10(4)  | 4(4)     |
| C(216) | 27(5)   | 37(5)   | 36(5)   | -6(4)    | 8(4)   | -9(4)    |
| C(217) | 33(5)   | 20(4)   | 45(6)   | 0(4)     | 1(4)   | -9(4)    |
| C(218) | 27(5)   | 28(5)   | 39(6)   | 7(4)     | 10(4)  | 2(4)     |
| C(219) | 27(5)   | 28(4)   | 28(5)   | 6(4)     | 9(4)   | -2(4)    |
| C(220) | 26(5)   | 32(5)   | 23(5)   | 0(4)     | 4(4)   | 3(4)     |
| C(221) | 20(4)   | 22(4)   | 36(5)   | -2(4)    | 9(4)   | -1(3)    |
| C(222) | 20(4)   | 18(4)   | 41(5)   | -4(4)    | 11(4)  | -4(3)    |
| C(223) | 14(4)   | 28(4)   | 22(5)   | 0(4)     | 3(4)   | -3(4)    |
| C(224) | 37(5)   | 14(4)   | 25(5)   | 1(3)     | 16(4)  | -4(4)    |
| C(225) | 40(6)   | 22(4)   | 37(5)   | 1(4)     | 12(4)  | -2(4)    |
| C(226) | 54(6)   | 26(5)   | 45(6)   | 6(4)     | 29(5)  | 16(5)    |
| C(227) | 46(6)   | 20(4)   | 41(6)   | 11(4)    | 27(5)  | 12(4)    |
| C(228) | 49(6)   | 32(5)   | 63(7)   | 5(5)     | 35(6)  | 4(5)     |
| C(229) | 45(7)   | 66(7)   | 62(8)   | 10(6)    | 33(6)  | 16(6)    |
| C(230) | 55(8)   | 88(10)  | 106(11) | 26(8)    | 58(8)  | -1(7)    |
| C(231) | 69(9)   | 78(9)   | 108(11) | 8(8)     | 59(9)  | 32(7)    |
| C(232) | 21(5)   | 21(5)   | 50(6)   | 7(4)     | 11(4)  | -1(4)    |
| N(2)   | 26(4)   | 26(4)   | 31(4)   | -4(3)    | 8(3)   | -5(3)    |
| N(18)  | 39(5)   | 22(4)   | 55(5)   | 7(4)     | 26(4)  | -6(3)    |

|        |       |         |         |        |       |        |
|--------|-------|---------|---------|--------|-------|--------|
| N(105) | 28(4) | 17(3)   | 35(4)   | 1(3)   | 16(3) | 2(3)   |
| N(110) | 26(4) | 26(4)   | 42(5)   | 4(3)   | 17(4) | 2(3)   |
| N(121) | 25(4) | 20(4)   | 34(4)   | -1(3)  | 9(3)  | -6(3)  |
| N(132) | 27(4) | 21(4)   | 33(4)   | -3(3)  | 10(3) | 2(3)   |
| N(201) | 20(4) | 27(4)   | 27(4)   | 1(3)   | 6(3)  | 7(3)   |
| N(202) | 25(4) | 21(4)   | 36(5)   | 4(3)   | 3(3)  | -5(3)  |
| N(203) | 25(4) | 39(4)   | 25(4)   | 5(3)   | 9(3)  | 7(3)   |
| N(204) | 36(4) | 23(4)   | 58(6)   | 7(4)   | 31(4) | 9(3)   |
| N(205) | 25(4) | 18(4)   | 36(4)   | 6(3)   | 7(3)  | 1(3)   |
| N(206) | 36(4) | 19(3)   | 41(5)   | 0(3)   | 21(4) | 7(3)   |
| N(207) | 21(4) | 23(4)   | 38(5)   | -5(3)  | 12(3) | -1(3)  |
| O(101) | 33(4) | 45(4)   | 29(4)   | 7(3)   | 12(3) | 0(3)   |
| N(112) | 40(5) | 52(5)   | 36(5)   | -18(4) | 19(4) | -20(4) |
| N(111) | 42(5) | 60(5)   | 31(5)   | -21(4) | 16(4) | -24(4) |
| O(104) | 48(6) | 162(10) | 39(5)   | -2(5)  | 6(4)  | -34(6) |
| O(105) | 41(4) | 43(4)   | 49(4)   | -15(3) | 21(3) | -5(3)  |
| O(106) | 47(4) | 19(3)   | 88(6)   | -5(3)  | 34(4) | -8(3)  |
| O(108) | 30(3) | 32(3)   | 39(4)   | 5(3)   | 19(3) | 5(3)   |
| O(109) | 39(4) | 29(3)   | 36(4)   | -1(3)  | 14(3) | -4(3)  |
| O(110) | 52(4) | 19(3)   | 49(4)   | -9(3)  | 11(3) | 0(3)   |
| O(111) | 32(4) | 44(4)   | 66(5)   | -13(3) | 25(4) | -5(3)  |
| O(122) | 25(3) | 32(3)   | 31(4)   | -3(3)  | 3(3)  | 0(3)   |
| O(201) | 29(4) | 42(4)   | 30(4)   | -7(3)  | 12(3) | -4(3)  |
| O(203) | 23(3) | 29(3)   | 35(4)   | 9(3)   | 6(3)  | -2(3)  |
| N(211) | 27(4) | 34(4)   | 25(4)   | 7(3)   | 7(3)  | 9(3)   |
| O(205) | 29(4) | 66(5)   | 41(4)   | -6(3)  | 7(3)  | -9(3)  |
| O(206) | 34(4) | 38(4)   | 79(5)   | 7(4)   | 25(4) | -5(3)  |
| O(207) | 44(4) | 18(3)   | 61(5)   | 10(3)  | 16(3) | -2(3)  |
| O(208) | 27(3) | 28(3)   | 36(4)   | 0(3)   | 8(3)  | 6(3)   |
| O(209) | 30(4) | 15(3)   | 75(5)   | 0(3)   | 20(3) | 2(3)   |
| O(210) | 43(4) | 56(5)   | 49(5)   | 20(4)  | 23(4) | 13(4)  |
| O(211) | 27(3) | 26(3)   | 43(4)   | -4(3)  | 10(3) | -8(3)  |
| C(1S)  | 58(8) | 76(9)   | 85(10)  | -21(8) | 29(7) | -13(7) |
| C(2S)  | 57(7) | 40(6)   | 48(7)   | 9(5)   | 8(5)  | -8(5)  |
| C(3S)  | 55(7) | 40(6)   | 60(8)   | -2(5)  | 4(6)  | 3(5)   |
| C(4S)  | 31(6) | 41(6)   | 113(10) | 3(6)   | 35(6) | 7(5)   |
| C(5S)  | 38(7) | 31(6)   | 110(11) | 13(6)  | 15(7) | -4(5)  |
| O(1S)  | 69(6) | 64(5)   | 60(6)   | -17(4) | 8(5)  | 9(5)   |
| O(2S)  | 29(3) | 34(3)   | 41(4)   | 7(3)   | -3(3) | 3(3)   |

|       |         |         |         |         |         |         |
|-------|---------|---------|---------|---------|---------|---------|
| O(3S) | 49(5)   | 44(4)   | 46(5)   | -6(3)   | -2(3)   | -6(3)   |
| O(4S) | 131(14) | 202(17) | 167(15) | -18(13) | 20(10)  | -36(12) |
| O(5S) | 179(14) | 88(9)   | 300(20) | 64(11)  | 177(15) | 24(9)   |

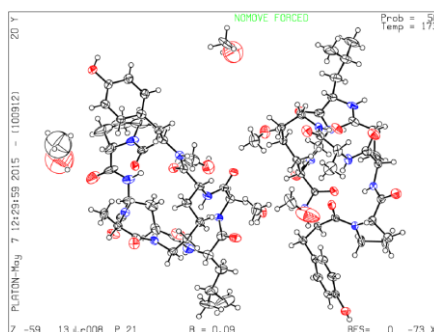

**Table S13** Crystal data and structure refinement for **15** (CCDC 1063796)

|                                   |                                                                |                    |
|-----------------------------------|----------------------------------------------------------------|--------------------|
| Empirical formula                 | C <sub>40</sub> H <sub>68</sub> N <sub>8</sub> O <sub>13</sub> |                    |
| Formula weight                    | 869.02                                                         |                    |
| Temperature                       | 123(2) K                                                       |                    |
| Wavelength                        | 0.71073 Å                                                      |                    |
| Crystal system                    | Monoclinic                                                     |                    |
| Space group                       | P 1 21 1                                                       |                    |
| Unit cell dimensions              | a = 13.3658(2) Å                                               | α = 90°.           |
|                                   | b = 9.48640(10) Å                                              | β = 104.2040(10)°. |
|                                   | c = 17.7634(2) Å                                               | γ = 90°.           |
| Volume                            | 2183.42(5) Å <sup>3</sup>                                      |                    |
| Z                                 | 2                                                              |                    |
| Density (calculated)              | 1.322 Mg/m <sup>3</sup>                                        |                    |
| Absorption coefficient            | 0.099 mm <sup>-1</sup>                                         |                    |
| F(000)                            | 936                                                            |                    |
| Crystal size                      | 0.3069 x 0.1396 x 0.0564 mm <sup>3</sup>                       |                    |
| Theta range for data collection   | 1.57 to 27.31°.                                                |                    |
| Index ranges                      | -16 ≤ h ≤ 16, -12 ≤ k ≤ 12, -22 ≤ l ≤ 22                       |                    |
| Reflections collected             | 33579                                                          |                    |
| Independent reflections           | 8949 [R(int) = 0.0296]                                         |                    |
| Completeness to theta = 25.00°    | 100.0 %                                                        |                    |
| Absorption correction             | Gaussian                                                       |                    |
| Max. and min. transmission        | 1.351 and 1.074                                                |                    |
| Refinement method                 | Full-matrix least-squares on F <sup>2</sup>                    |                    |
| Data / restraints / parameters    | 8949 / 11 / 553                                                |                    |
| Goodness-of-fit on F <sup>2</sup> | 1.080                                                          |                    |
| Final R indices [I > 2σ(I)]       | R1 = 0.0575, wR2 = 0.1487                                      |                    |
| R indices (all data)              | R1 = 0.0623, wR2 = 0.1518                                      |                    |
| Absolute structure parameter      | 0.6(11)                                                        |                    |
| Largest diff. peak and hole       | 0.997 and -0.359 e.Å <sup>-3</sup>                             |                    |

**Table S14.** Atomic coordinates (x 10<sup>4</sup>) and equivalent isotropic displacement parameters (Å<sup>2</sup> × 10<sup>3</sup>) for **15**. U(eq) is defined as one third of the trace of the orthogonalized U<sup>ij</sup> tensor.

|      | x        | y       | z       | U(eq) |
|------|----------|---------|---------|-------|
| C(1) | 12416(2) | 2280(3) | 5623(2) | 22(1) |
| C(2) | 11948(2) | 3320(3) | 5104(2) | 26(1) |
| C(3) | 10919(2) | 3654(3) | 5032(2) | 28(1) |
| C(4) | 10331(2) | 2959(3) | 5469(2) | 23(1) |

|       |          |          |         |       |
|-------|----------|----------|---------|-------|
| C(5)  | 10821(2) | 1945(3)  | 5996(2) | 24(1) |
| C(6)  | 11846(2) | 1586(3)  | 6076(2) | 26(1) |
| C(7)  | 9205(2)  | 3328(3)  | 5378(2) | 23(1) |
| C(8)  | 9051(2)  | 4685(3)  | 5816(2) | 21(1) |
| C(9)  | 9638(2)  | 4513(3)  | 6665(2) | 25(1) |
| C(10) | 10854(3) | 6471(5)  | 6542(2) | 45(1) |
| C(11) | 11688(4) | 7120(7)  | 7193(3) | 75(2) |
| C(12) | 12131(3) | 5856(7)  | 7687(3) | 68(2) |
| C(13) | 11177(3) | 4946(5)  | 7698(2) | 42(1) |
| C(14) | 10712(3) | 5324(4)  | 8379(2) | 40(1) |
| C(15) | 9309(2)  | 6381(4)  | 8839(2) | 27(1) |
| C(16) | 8775(2)  | 5046(4)  | 9028(2) | 27(1) |
| C(17) | 8197(3)  | 2628(3)  | 8597(2) | 28(1) |
| C(18) | 8787(3)  | 1944(4)  | 9357(2) | 41(1) |
| C(19) | 7047(3)  | 2498(3)  | 8481(2) | 28(1) |
| C(20) | 5353(2)  | 3635(4)  | 8120(2) | 29(1) |
| C(21) | 4934(2)  | 3342(3)  | 7248(2) | 26(1) |
| C(22) | 5131(2)  | 4513(3)  | 6710(2) | 22(1) |
| C(23) | 6248(2)  | 4598(3)  | 6645(2) | 21(1) |
| C(25) | 6480(2)  | 5840(3)  | 6154(2) | 19(1) |
| C(26) | 7647(2)  | 5824(3)  | 6208(2) | 20(1) |
| C(27) | 5876(2)  | 8298(3)  | 6022(2) | 20(1) |
| C(28) | 5591(2)  | 9612(3)  | 6429(2) | 24(1) |
| C(29) | 4828(2)  | 8706(3)  | 7446(2) | 26(1) |
| C(30) | 4942(3)  | 8501(4)  | 8317(2) | 30(1) |
| C(31) | 4299(3)  | 9600(4)  | 8623(2) | 39(1) |
| C(32) | 4244(3)  | 9351(6)  | 9463(2) | 52(1) |
| C(33) | 3805(4)  | 10643(7) | 9777(3) | 71(2) |
| C(34) | 3631(4)  | 8049(6)  | 9552(2) | 63(1) |
| C(35) | 6724(3)  | 7641(3)  | 8657(2) | 30(1) |
| C(36) | 7814(3)  | 7893(4)  | 9103(2) | 37(1) |
| C(37) | 8569(3)  | 7622(4)  | 8588(2) | 36(1) |
| N(1)  | 7961(2)  | 4878(3)  | 5759(1) | 21(1) |
| N(2)  | 10487(2) | 5271(3)  | 6930(2) | 29(1) |
| N(3)  | 9858(2)  | 6134(3)  | 8231(2) | 31(1) |
| N(4)  | 8562(2)  | 4052(3)  | 8485(1) | 25(1) |
| N(5)  | 6475(2)  | 3658(3)  | 8366(1) | 25(1) |
| N(6)  | 6178(2)  | 7158(2)  | 6455(1) | 21(1) |
| N(7)  | 5591(2)  | 9409(3)  | 7235(2) | 24(1) |



|       |          |          |           |         |
|-------|----------|----------|-----------|---------|
| N(8)  | 6010(2)  | 8573(3)  | 8769(2)   | 29(1)   |
| O(1)  | 13415(2) | 1872(2)  | 5700(1)   | 26(1)   |
| O(2)  | 9360(2)  | 3602(2)  | 7073(1)   | 24(1)   |
| O(3)  | 11131(2) | 4884(4)  | 9027(1)   | 50(1)   |
| O(4)  | 8532(2)  | 4951(3)  | 9655(1)   | 39(1)   |
| O(5)  | 6665(2)  | 1297(2)  | 8475(1)   | 37(1)   |
| O(6)  | 8243(2)  | 6567(2)  | 6685(1)   | 26(1)   |
| O(7)  | 5820(2)  | 8374(2)  | 5321(1)   | 25(1)   |
| O(8)  | 4078(2)  | 8210(3)  | 6981(1)   | 32(1)   |
| O(9)  | 6472(2)  | 6646(2)  | 8200(1)   | 34(1)   |
| C(1S) | 8471(4)  | 136(6)   | 6902(3)   | 70(1)   |
| O(1S) | 7907(2)  | 1390(3)  | 6735(2)   | 52(1)   |
| O(2S) | 10795(3) | -194(4)  | 8695(2)   | 79(1)   |
| C(2S) | 11015(4) | 1109(6)  | 8398(3)   | 59(1)   |
| C(3S) | 6598(3)  | 1766(4)  | 4794(2)   | 37(1)   |
| O(3S) | 6731(2)  | 3189(2)  | 4601(1)   | 35(1)   |
| O(4S) | 6836(9)  | 9850(13) | 10265(7)  | 60(4)   |
| C(4S) | 6510(30) | 9030(40) | 10841(18) | 138(13) |

---

**Table S15.** Bond lengths [Å] and angles [°] for **15**.

---

Bond lengths [Å]

|             |          |
|-------------|----------|
| C(1)-O(1)   | 1.365(4) |
| C(1)-C(2)   | 1.389(4) |
| C(1)-C(6)   | 1.400(4) |
| C(2)-C(3)   | 1.387(4) |
| C(3)-C(4)   | 1.397(4) |
| C(4)-C(5)   | 1.389(4) |
| C(4)-C(7)   | 1.516(4) |
| C(5)-C(6)   | 1.385(4) |
| C(7)-C(8)   | 1.543(4) |
| C(8)-N(1)   | 1.448(4) |
| C(8)-C(9)   | 1.528(4) |
| C(9)-O(2)   | 1.242(4) |
| C(9)-N(2)   | 1.328(4) |
| C(10)-N(2)  | 1.475(5) |
| C(10)-C(11) | 1.525(6) |
| C(11)-C(12) | 1.518(9) |

|             |          |
|-------------|----------|
| C(12)-C(13) | 1.544(6) |
| C(13)-N(2)  | 1.480(5) |
| C(13)-C(14) | 1.533(5) |
| C(14)-O(3)  | 1.223(5) |
| C(14)-N(3)  | 1.347(5) |
| C(15)-N(3)  | 1.465(4) |
| C(15)-C(16) | 1.530(5) |
| C(15)-C(37) | 1.531(5) |
| C(16)-O(4)  | 1.237(4) |
| C(16)-N(4)  | 1.329(4) |
| C(17)-N(4)  | 1.466(4) |
| C(17)-C(19) | 1.505(5) |
| C(17)-C(18) | 1.531(4) |
| C(19)-O(5)  | 1.248(4) |
| C(19)-N(5)  | 1.327(4) |
| C(20)-N(5)  | 1.455(4) |
| C(20)-C(21) | 1.537(4) |
| C(21)-C(22) | 1.531(4) |
| C(22)-C(23) | 1.528(4) |
| C(23)-C(25) | 1.542(4) |
| C(25)-N(6)  | 1.456(3) |
| C(25)-C(26) | 1.539(4) |
| C(26)-O(6)  | 1.232(4) |
| C(26)-N(1)  | 1.335(4) |
| C(27)-O(7)  | 1.231(3) |
| C(27)-N(6)  | 1.331(4) |
| C(27)-C(28) | 1.535(4) |
| C(28)-N(7)  | 1.446(4) |
| C(29)-O(8)  | 1.225(4) |
| C(29)-N(7)  | 1.345(4) |
| C(29)-C(30) | 1.530(4) |
| C(30)-N(8)  | 1.457(4) |
| C(30)-C(31) | 1.534(5) |
| C(31)-C(32) | 1.531(5) |
| C(32)-C(34) | 1.511(7) |
| C(32)-C(33) | 1.523(6) |
| C(35)-O(9)  | 1.236(4) |
| C(35)-N(8)  | 1.351(4) |
| C(35)-C(36) | 1.498(5) |

|             |           |
|-------------|-----------|
| C(36)-C(37) | 1.540(5)  |
| C(1S)-O(1S) | 1.400(6)  |
| O(2S)-C(2S) | 1.403(6)  |
| C(3S)-O(3S) | 1.414(4)  |
| O(4S)-C(4S) | 1.438(18) |

## Angles [°]

|                   |          |
|-------------------|----------|
| O(1)-C(1)-C(2)    | 122.5(3) |
| O(1)-C(1)-C(6)    | 117.8(3) |
| C(2)-C(1)-C(6)    | 119.7(3) |
| C(3)-C(2)-C(1)    | 119.9(3) |
| C(2)-C(3)-C(4)    | 121.4(3) |
| C(5)-C(4)-C(3)    | 117.7(3) |
| C(5)-C(4)-C(7)    | 121.6(3) |
| C(3)-C(4)-C(7)    | 120.7(3) |
| C(4)-C(5)-C(6)    | 122.1(3) |
| C(5)-C(6)-C(1)    | 119.3(3) |
| C(4)-C(7)-C(8)    | 112.9(2) |
| N(1)-C(8)-C(9)    | 110.2(2) |
| N(1)-C(8)-C(7)    | 109.0(2) |
| C(9)-C(8)-C(7)    | 108.0(2) |
| O(2)-C(9)-N(2)    | 121.4(3) |
| O(2)-C(9)-C(8)    | 119.7(3) |
| N(2)-C(9)-C(8)    | 118.6(3) |
| N(2)-C(10)-C(11)  | 102.9(4) |
| C(12)-C(11)-C(10) | 103.2(4) |
| C(11)-C(12)-C(13) | 104.1(4) |
| N(2)-C(13)-C(14)  | 113.4(3) |
| N(2)-C(13)-C(12)  | 101.6(3) |
| C(14)-C(13)-C(12) | 112.0(3) |
| O(3)-C(14)-N(3)   | 123.3(3) |
| O(3)-C(14)-C(13)  | 118.9(3) |
| N(3)-C(14)-C(13)  | 117.8(3) |
| N(3)-C(15)-C(16)  | 112.0(3) |
| N(3)-C(15)-C(37)  | 108.3(3) |
| C(16)-C(15)-C(37) | 113.4(3) |
| O(4)-C(16)-N(4)   | 122.9(3) |
| O(4)-C(16)-C(15)  | 119.9(3) |
| N(4)-C(16)-C(15)  | 117.2(3) |
| N(4)-C(17)-C(19)  | 114.8(3) |

|                   |          |
|-------------------|----------|
| N(4)-C(17)-C(18)  | 113.2(3) |
| C(19)-C(17)-C(18) | 111.9(3) |
| O(5)-C(19)-N(5)   | 122.5(3) |
| O(5)-C(19)-C(17)  | 118.6(3) |
| N(5)-C(19)-C(17)  | 118.9(3) |
| N(5)-C(20)-C(21)  | 113.5(3) |
| C(22)-C(21)-C(20) | 115.0(3) |
| C(23)-C(22)-C(21) | 114.0(2) |
| C(22)-C(23)-C(25) | 114.7(2) |
| N(6)-C(25)-C(26)  | 110.7(2) |
| N(6)-C(25)-C(23)  | 109.6(2) |
| C(26)-C(25)-C(23) | 107.4(2) |
| O(6)-C(26)-N(1)   | 123.4(3) |
| O(6)-C(26)-C(25)  | 120.8(2) |
| N(1)-C(26)-C(25)  | 115.5(2) |
| O(7)-C(27)-N(6)   | 124.5(3) |
| O(7)-C(27)-C(28)  | 117.9(3) |
| N(6)-C(27)-C(28)  | 117.6(2) |
| N(7)-C(28)-C(27)  | 114.8(2) |
| O(8)-C(29)-N(7)   | 123.6(3) |
| O(8)-C(29)-C(30)  | 119.6(3) |
| N(7)-C(29)-C(30)  | 116.7(3) |
| N(8)-C(30)-C(29)  | 113.1(3) |
| N(8)-C(30)-C(31)  | 109.4(3) |
| C(29)-C(30)-C(31) | 110.3(3) |
| C(32)-C(31)-C(30) | 113.9(4) |
| C(34)-C(32)-C(33) | 110.6(4) |
| C(34)-C(32)-C(31) | 112.6(3) |
| C(33)-C(32)-C(31) | 110.4(4) |
| O(9)-C(35)-N(8)   | 120.6(3) |
| O(9)-C(35)-C(36)  | 122.8(3) |
| N(8)-C(35)-C(36)  | 116.6(3) |
| C(35)-C(36)-C(37) | 110.7(3) |
| C(15)-C(37)-C(36) | 115.2(3) |
| C(26)-N(1)-C(8)   | 120.2(2) |
| C(9)-N(2)-C(10)   | 127.3(3) |
| C(9)-N(2)-C(13)   | 119.9(3) |
| C(10)-N(2)-C(13)  | 112.8(3) |
| C(14)-N(3)-C(15)  | 120.0(3) |

|                  |          |
|------------------|----------|
| C(16)-N(4)-C(17) | 125.1(3) |
| C(19)-N(5)-C(20) | 123.1(3) |
| C(27)-N(6)-C(25) | 123.8(2) |
| C(29)-N(7)-C(28) | 121.7(3) |
| C(35)-N(8)-C(30) | 121.3(3) |

**Table S16.** Anisotropic displacement parameters ( $\text{\AA}^2 \times 10^3$ ) for **15**. The anisotropic displacement factor exponent takes the form:  $-2\pi^2 [ h^2 a^{*2} U^{11} + \dots + 2 h k a^* b^* U^{12} ]$

|       | $U^{11}$ | $U^{22}$ | $U^{33}$ | $U^{23}$ | $U^{13}$ | $U^{12}$ |
|-------|----------|----------|----------|----------|----------|----------|
| C(1)  | 20(1)    | 24(2)    | 23(1)    | -7(1)    | 7(1)     | -1(1)    |
| C(2)  | 30(2)    | 24(2)    | 28(1)    | 2(1)     | 17(1)    | -1(1)    |
| C(3)  | 30(2)    | 26(2)    | 31(2)    | 1(1)     | 13(1)    | 6(1)     |
| C(4)  | 21(2)    | 27(2)    | 23(1)    | -5(1)    | 10(1)    | 0(1)     |
| C(5)  | 25(2)    | 25(2)    | 26(1)    | -3(1)    | 12(1)    | -3(1)    |
| C(6)  | 26(2)    | 27(2)    | 24(1)    | 3(1)     | 7(1)     | 4(1)     |
| C(7)  | 21(1)    | 24(2)    | 27(1)    | -5(1)    | 10(1)    | 1(1)     |
| C(8)  | 22(1)    | 20(1)    | 25(1)    | -2(1)    | 13(1)    | -2(1)    |
| C(9)  | 24(2)    | 26(2)    | 28(2)    | -9(1)    | 14(1)    | -4(1)    |
| C(10) | 44(2)    | 58(3)    | 44(2)    | -21(2)   | 28(2)    | -34(2)   |
| C(11) | 58(3)    | 110(5)   | 67(3)    | -44(3)   | 35(3)    | -62(3)   |
| C(12) | 28(2)    | 130(5)   | 48(2)    | -33(3)   | 13(2)    | -33(3)   |
| C(13) | 23(2)    | 72(3)    | 33(2)    | -16(2)   | 9(1)     | -10(2)   |
| C(14) | 22(2)    | 60(2)    | 38(2)    | -22(2)   | 7(1)     | -11(2)   |
| C(15) | 24(2)    | 38(2)    | 22(1)    | -10(1)   | 11(1)    | -8(1)    |
| C(16) | 23(2)    | 37(2)    | 21(1)    | 0(1)     | 4(1)     | -1(1)    |
| C(17) | 36(2)    | 26(2)    | 22(1)    | 4(1)     | 8(1)     | -1(1)    |
| C(18) | 43(2)    | 40(2)    | 37(2)    | 15(2)    | 5(2)     | 10(2)    |
| C(19) | 41(2)    | 25(2)    | 17(1)    | 4(1)     | 5(1)     | -2(1)    |
| C(20) | 30(2)    | 32(2)    | 28(2)    | 5(1)     | 11(1)    | -5(1)    |
| C(21) | 21(1)    | 29(2)    | 28(2)    | 2(1)     | 5(1)     | -6(1)    |
| C(22) | 20(1)    | 24(1)    | 22(1)    | 1(1)     | 3(1)     | -2(1)    |
| C(23) | 24(2)    | 15(1)    | 26(1)    | 2(1)     | 10(1)    | 2(1)     |
| C(25) | 23(1)    | 17(1)    | 20(1)    | -1(1)    | 9(1)     | 1(1)     |
| C(26) | 27(2)    | 16(1)    | 18(1)    | 3(1)     | 9(1)     | 2(1)     |
| C(27) | 17(1)    | 21(1)    | 27(1)    | 1(1)     | 14(1)    | -2(1)    |
| C(28) | 26(2)    | 18(1)    | 34(2)    | 1(1)     | 15(1)    | 2(1)     |
| C(29) | 32(2)    | 23(2)    | 29(2)    | -6(1)    | 18(1)    | -2(1)    |

|       |        |        |       |        |       |        |
|-------|--------|--------|-------|--------|-------|--------|
| C(30) | 34(2)  | 33(2)  | 29(2) | -6(1)  | 16(1) | -9(1)  |
| C(31) | 33(2)  | 48(2)  | 42(2) | -20(2) | 19(2) | -8(2)  |
| C(32) | 31(2)  | 93(3)  | 34(2) | -30(2) | 13(2) | -7(2)  |
| C(33) | 51(3)  | 106(4) | 62(3) | -49(3) | 30(2) | -9(3)  |
| C(34) | 54(3)  | 107(4) | 36(2) | -11(2) | 25(2) | -19(3) |
| C(35) | 50(2)  | 23(2)  | 20(1) | 0(1)   | 17(1) | -1(1)  |
| C(36) | 43(2)  | 42(2)  | 29(2) | -7(2)  | 13(2) | 7(2)   |
| C(37) | 46(2)  | 35(2)  | 32(2) | -4(1)  | 21(2) | -5(2)  |
| N(1)  | 22(1)  | 22(1)  | 21(1) | 0(1)   | 9(1)  | 0(1)   |
| N(2)  | 22(1)  | 40(2)  | 28(1) | -11(1) | 11(1) | -7(1)  |
| N(3)  | 26(1)  | 40(2)  | 28(1) | -9(1)  | 13(1) | -10(1) |
| N(4)  | 27(1)  | 32(1)  | 18(1) | 1(1)   | 6(1)  | -2(1)  |
| N(5)  | 27(1)  | 24(1)  | 23(1) | 2(1)   | 4(1)  | -9(1)  |
| N(6)  | 28(1)  | 18(1)  | 20(1) | -1(1)  | 12(1) | 4(1)   |
| N(7)  | 26(1)  | 20(1)  | 29(1) | -3(1)  | 15(1) | -2(1)  |
| N(8)  | 34(1)  | 33(2)  | 25(1) | -9(1)  | 16(1) | -5(1)  |
| O(1)  | 21(1)  | 31(1)  | 28(1) | 0(1)   | 9(1)  | -1(1)  |
| O(2)  | 26(1)  | 28(1)  | 22(1) | 0(1)   | 9(1)  | -1(1)  |
| O(3)  | 32(1)  | 87(2)  | 28(1) | -18(1) | 2(1)  | 4(1)   |
| O(4)  | 48(2)  | 49(2)  | 24(1) | -4(1)  | 17(1) | -5(1)  |
| O(5)  | 48(2)  | 24(1)  | 38(1) | 6(1)   | 8(1)  | -9(1)  |
| O(6)  | 27(1)  | 23(1)  | 29(1) | -7(1)  | 10(1) | -4(1)  |
| O(7)  | 29(1)  | 25(1)  | 24(1) | 6(1)   | 12(1) | 5(1)   |
| O(8)  | 34(1)  | 38(1)  | 29(1) | -4(1)  | 16(1) | -9(1)  |
| O(9)  | 53(2)  | 21(1)  | 29(1) | 0(1)   | 15(1) | 4(1)   |
| C(1S) | 81(4)  | 64(3)  | 71(3) | -8(3)  | 31(3) | -4(3)  |
| O(1S) | 56(2)  | 38(2)  | 54(2) | 5(1)   | 0(1)  | -17(1) |
| O(2S) | 103(3) | 81(3)  | 45(2) | -1(2)  | 5(2)  | -32(2) |
| C(2S) | 57(3)  | 70(3)  | 49(2) | 17(2)  | 9(2)  | 11(2)  |
| C(3S) | 36(2)  | 30(2)  | 39(2) | -3(2)  | 1(2)  | -3(2)  |
| O(3S) | 38(1)  | 31(1)  | 30(1) | -2(1)  | -1(1) | -3(1)  |

---

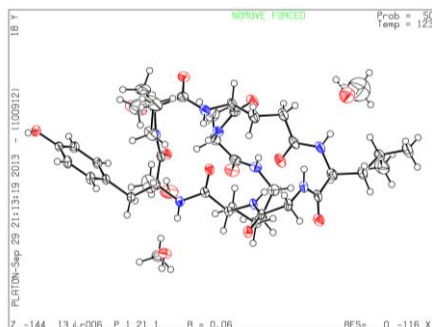

**Table S17.** Crystal data and structure refinement for **32** (CCDC 1063793).

|                                   |                                                                  |                 |
|-----------------------------------|------------------------------------------------------------------|-----------------|
| Empirical formula                 | C <sub>74</sub> H <sub>112</sub> N <sub>16</sub> O <sub>18</sub> |                 |
| Formula weight                    | 1513.79                                                          |                 |
| Temperature                       | 120(2) K                                                         |                 |
| Wavelength                        | 0.71073 Å                                                        |                 |
| Crystal system                    | Monoclinic                                                       |                 |
| Space group                       | P 21                                                             |                 |
| Unit cell dimensions              | a = 9.2715(4) Å                                                  | α = 90°.        |
|                                   | b = 36.7577(15) Å                                                | β = 90.098(4)°. |
|                                   | c = 11.3129(5) Å                                                 | γ = 90°.        |
| Volume                            | 3855.4(3) Å <sup>3</sup>                                         |                 |
| Z                                 | 2                                                                |                 |
| Density (calculated)              | 1.304 Mg/m <sup>3</sup>                                          |                 |
| Absorption coefficient            | 0.094 mm <sup>-1</sup>                                           |                 |
| F(000)                            | 1624                                                             |                 |
| Crystal size                      | ? x ? x ? mm <sup>3</sup>                                        |                 |
| Theta range for data collection   | 1.800 to 24.713°.                                                |                 |
| Index ranges                      | -10 ≤ h ≤ 10, -41 ≤ k ≤ 43, -13 ≤ l ≤ 13                         |                 |
| Reflections collected             | 26472                                                            |                 |
| Independent reflections           | 11905 [R(int) = 0.1025]                                          |                 |
| Completeness to theta = 25.242°   | 94.0 %                                                           |                 |
| Refinement method                 | Full-matrix least-squares on F <sup>2</sup>                      |                 |
| Data / restraints / parameters    | 11905 / 481 / 964                                                |                 |
| Goodness-of-fit on F <sup>2</sup> | 1.063                                                            |                 |
| Final R indices [I > 2σ(I)]       | R1 = 0.1570, wR2 = 0.3787                                        |                 |
| R indices (all data)              | R1 = 0.2072, wR2 = 0.4110                                        |                 |
| Absolute structure parameter      | 1.8(10)                                                          |                 |
| Extinction coefficient            | 0.020(3)                                                         |                 |
| Largest diff. peak and hole       | 0.824 and -0.597 e.Å <sup>-3</sup>                               |                 |

**Table S18.** Atomic coordinates (x 10<sup>4</sup>) and equivalent isotropic displacement parameters (Å<sup>2</sup> × 10<sup>3</sup>) for **32**. U(eq) is defined as one third of the trace of the orthogonalized U<sup>ij</sup> tensor.

|        | x        | y        | z        | U(eq)  |
|--------|----------|----------|----------|--------|
| C(101) | 2820(40) | 3706(10) | 7160(30) | 77(10) |
| C(102) | 3610(40) | 3714(11) | 6140(40) | 89(11) |
| C(103) | 5000(40) | 3897(11) | 6270(40) | 91(11) |
| C(104) | 5510(40) | 4015(9)  | 7280(30) | 71(9)  |
| C(105) | 4650(40) | 3984(10) | 8230(30) | 77(10) |
| C(106) | 3170(40) | 3851(10) | 8140(30) | 79(10) |
| C(107) | 7050(20) | 4164(6)  | 7450(20) | 33(5)  |
| C(108) | 7320(20) | 4465(6)  | 8300(20) | 36(5)  |

|        |           |          |           |        |
|--------|-----------|----------|-----------|--------|
| C(109) | 6430(20)  | 4827(5)  | 8068(17)  | 19(4)  |
| C(110) | 7160(20)  | 5087(6)  | 10020(17) | 25(5)  |
| C(111) | 6300(20)  | 5344(6)  | 10758(18) | 29(5)  |
| C(112) | 5720(20)  | 5622(6)  | 9845(18)  | 26(5)  |
| C(113) | 5490(20)  | 5378(5)  | 8706(16)  | 20(4)  |
| C(114) | 5580(18)  | 5595(5)  | 7571(15)  | 11(4)  |
| C(115) | 7400(20)  | 5854(5)  | 6185(17)  | 22(4)  |
| C(116) | 8980(20)  | 5977(5)  | 6344(16)  | 19(4)  |
| C(117) | 9270(20)  | 6204(5)  | 7430(16)  | 18(4)  |
| C(118) | 9481(18)  | 5984(5)  | 8576(16)  | 16(4)  |
| C(119) | 9700(20)  | 6017(6)  | 10671(17) | 24(5)  |
| C(120) | 9830(20)  | 6278(5)  | 11704(17) | 23(4)  |
| C(121) | 8680(20)  | 6570(6)  | 11810(18) | 25(5)  |
| C(122) | 7170(20)  | 6409(6)  | 11720(18) | 27(5)  |
| C(123) | 8850(30)  | 6786(7)  | 12970(20) | 41(6)  |
| C(124) | 11060(20) | 5790(6)  | 10630(17) | 26(5)  |
| C(125) | 12180(20) | 5198(6)  | 11010(19) | 33(5)  |
| C(126) | 12200(20) | 4953(5)  | 9940(17)  | 21(4)  |
| C(127) | 11210(20) | 4825(6)  | 7984(18)  | 25(5)  |
| C(128) | 11880(20) | 5018(6)  | 6905(17)  | 29(5)  |
| C(129) | 11940(20) | 4757(6)  | 5825(18)  | 33(5)  |
| C(130) | 12310(20) | 4946(6)  | 4720(20)  | 32(5)  |
| C(131) | 11260(20) | 5224(6)  | 4358(18)  | 30(5)  |
| C(132) | 8750(20)  | 5085(5)  | 3606(18)  | 23(4)  |
| C(133) | 7130(20)  | 5064(6)  | 4000(19)  | 30(5)  |
| C(134) | 6720(20)  | 4668(6)  | 4260(20)  | 35(5)  |
| C(135) | 9530(20)  | 4761(6)  | 7770(19)  | 28(5)  |
| C(136) | 9510(20)  | 4333(7)  | 9550(20)  | 47(7)  |
| C(137) | 7240(20)  | 5628(6)  | 5026(17)  | 21(4)  |
| C(201) | 8180(40)  | 9096(11) | 7530(40)  | 90(11) |
| C(202) | 9490(30)  | 9203(8)  | 7130(30)  | 59(7)  |
| C(203) | 10640(40) | 9018(9)  | 7430(30)  | 73(9)  |
| C(204) | 10670(30) | 8736(7)  | 8220(20)  | 43(6)  |
| C(205) | 9330(30)  | 8669(8)  | 8650(30)  | 52(7)  |
| C(206) | 8200(30)  | 8830(8)  | 8400(30)  | 59(8)  |
| C(207) | 12100(30) | 8538(7)  | 8620(20)  | 42(6)  |
| C(208) | 12360(20) | 8227(6)  | 7728(19)  | 28(5)  |
| C(209) | 11410(20) | 7889(5)  | 7998(17)  | 22(4)  |
| C(210) | 12160(20) | 7615(6)  | 6045(16)  | 26(5)  |



|        |           |         |           |       |
|--------|-----------|---------|-----------|-------|
| C(211) | 11240(20) | 7336(6) | 5340(20)  | 35(5) |
| C(212) | 10679(17) | 7076(5) | 6289(14)  | 10(3) |
| C(213) | 10415(19) | 7316(5) | 7349(16)  | 20(4) |
| C(214) | 10620(20) | 7126(7) | 8510(20)  | 39(6) |
| C(215) | 12405(18) | 6892(5) | 9919(15)  | 14(4) |
| C(216) | 12233(19) | 7079(6) | 11066(17) | 22(4) |
| C(217) | 12120(20) | 7668(6) | 12086(19) | 30(5) |
| C(218) | 11840(30) | 8054(7) | 11850(20) | 48(7) |
| C(219) | 13770(20) | 7631(6) | 12540(20) | 36(6) |
| C(220) | 16160(20) | 7472(6) | 11820(20) | 31(5) |
| C(221) | 17370(20) | 7759(7) | 11430(20) | 36(6) |
| C(222) | 17000(20) | 7941(6) | 10291(19) | 34(5) |
| C(223) | 16900(20) | 7692(6) | 9264(19)  | 32(5) |
| C(224) | 16230(20) | 7882(6) | 8137(16)  | 23(4) |
| C(225) | 17220(20) | 7760(6) | 6229(19)  | 33(5) |
| C(226) | 17250(20) | 7516(6) | 5090(19)  | 28(5) |
| C(227) | 16020(20) | 6926(6) | 5528(18)  | 27(5) |
| C(228) | 14690(20) | 6719(6) | 5439(16)  | 22(4) |
| C(229) | 14790(20) | 6441(6) | 4374(17)  | 25(5) |
| C(230) | 13630(20) | 6152(6) | 4309(19)  | 29(5) |
| C(231) | 13870(20) | 5936(6) | 3102(17)  | 26(5) |
| C(232) | 12160(20) | 6308(6) | 4365(17)  | 28(5) |
| C(233) | 14339(19) | 6713(5) | 7592(16)  | 17(4) |
| C(234) | 14170(20) | 6516(6) | 8692(18)  | 34(5) |
| C(235) | 13950(20) | 6729(6) | 9806(18)  | 28(5) |
| C(236) | 14630(20) | 7954(6) | 8359(17)  | 23(4) |
| C(237) | 14560(30) | 8350(7) | 6570(20)  | 39(6) |
| N(101) | 8846(18)  | 4542(5) | 8516(16)  | 34(5) |
| N(102) | 6405(18)  | 5085(5) | 8870(15)  | 30(4) |
| N(103) | 11290(18) | 5046(5) | 9044(13)  | 24(4) |
| N(104) | 10986(17) | 5443(5) | 11082(13) | 25(4) |
| N(105) | 9467(15)  | 6187(5) | 9552(14)  | 26(4) |
| N(106) | 6950(20)  | 5622(5) | 7173(15)  | 34(5) |
| N(107) | 6977(18)  | 5278(5) | 5066(16)  | 30(4) |
| N(108) | 9659(17)  | 5104(5) | 4449(15)  | 29(4) |
| N(201) | 13849(17) | 8159(5) | 7520(14)  | 25(4) |
| N(202) | 16377(16) | 7661(5) | 7073(13)  | 23(4) |
| N(203) | 16012(17) | 7257(4) | 5038(15)  | 26(4) |
| N(204) | 14436(16) | 6518(4) | 6541(15)  | 20(4) |

|        |           |         |           |         |
|--------|-----------|---------|-----------|---------|
| N(205) | 12032(17) | 7082(4) | 8916(14)  | 20(4)   |
| N(206) | 11433(17) | 7624(4) | 7224(14)  | 21(4)   |
| N(207) | 11920(16) | 7427(5) | 11038(15) | 26(4)   |
| N(208) | 14721(18) | 7601(5) | 11684(14) | 27(4)   |
| O(1W)  | 20080(30) | 8292(8) | 4700(30)  | 118(10) |
| O(3W)  | 15190(40) | 4325(9) | 11240(30) | 125(10) |
| O(101) | 13040(14) | 4690(4) | 9905(13)  | 34(4)   |
| O(102) | 12194(15) | 5895(4) | 10120(14) | 37(4)   |
| O(103) | 4579(15)  | 5754(4) | 7110(12)  | 28(3)   |
| O(104) | 7611(13)  | 5795(4) | 4081(11)  | 23(3)   |
| O(105) | 9009(15)  | 5083(4) | 2566(11)  | 29(3)   |
| O(106) | 5645(16)  | 4838(4) | 7153(14)  | 37(4)   |
| O(107) | 8945(15)  | 4907(4) | 6930(12)  | 32(4)   |
| O(108) | 9507(15)  | 5661(4) | 8601(11)  | 26(3)   |
| O(201) | 12598(18) | 6931(5) | 12010(13) | 39(4)   |
| O(202) | 14001(16) | 7620(5) | 13582(12) | 35(4)   |
| O(203) | 9571(15)  | 6960(4) | 8965(12)  | 32(4)   |
| O(204) | 10683(15) | 7877(4) | 8889(12)  | 28(3)   |
| O(205) | 13901(15) | 7801(4) | 9152(11)  | 30(4)   |
| O(206) | 14523(14) | 7058(4) | 7548(12)  | 28(3)   |
| O(207) | 18028(17) | 8020(4) | 6200(13)  | 37(4)   |
| O(208) | 17184(14) | 6796(4) | 6000(12)  | 25(3)   |

---

**Table S19.** Bond lengths [Å] and angles [°] for **32**.

---

Bond lengths [Å]

|               |         |
|---------------|---------|
| C(101)-C(106) | 1.27(5) |
| C(101)-C(102) | 1.37(5) |
| C(102)-C(103) | 1.46(5) |
| C(103)-C(104) | 1.31(5) |
| C(104)-C(105) | 1.35(4) |
| C(104)-C(107) | 1.54(4) |
| C(105)-C(106) | 1.46(5) |
| C(107)-C(108) | 1.49(3) |
| C(108)-N(101) | 1.46(3) |
| C(108)-C(109) | 1.59(3) |
| C(109)-O(106) | 1.26(2) |
| C(109)-N(102) | 1.31(3) |
| C(110)-N(102) | 1.48(3) |

|               |         |
|---------------|---------|
| C(110)-C(111) | 1.50(3) |
| C(111)-C(112) | 1.55(3) |
| C(112)-C(113) | 1.58(3) |
| C(113)-N(102) | 1.38(3) |
| C(113)-C(114) | 1.51(2) |
| C(114)-O(103) | 1.21(2) |
| C(114)-N(106) | 1.35(2) |
| C(115)-N(106) | 1.47(3) |
| C(115)-C(116) | 1.54(3) |
| C(115)-C(137) | 1.56(3) |
| C(116)-C(117) | 1.51(3) |
| C(117)-C(118) | 1.54(3) |
| C(118)-O(108) | 1.19(2) |
| C(118)-N(105) | 1.33(3) |
| C(119)-N(105) | 1.43(3) |
| C(119)-C(124) | 1.51(3) |
| C(119)-C(120) | 1.52(3) |
| C(120)-C(121) | 1.52(3) |
| C(121)-C(122) | 1.52(3) |
| C(121)-C(123) | 1.54(3) |
| C(124)-O(102) | 1.26(2) |
| C(124)-N(104) | 1.38(3) |
| C(125)-N(104) | 1.43(3) |
| C(125)-C(126) | 1.51(3) |
| C(126)-O(101) | 1.24(2) |
| C(126)-N(103) | 1.36(3) |
| C(127)-N(103) | 1.45(3) |
| C(127)-C(128) | 1.54(3) |
| C(127)-C(135) | 1.59(3) |
| C(128)-C(129) | 1.56(3) |
| C(129)-C(130) | 1.47(3) |
| C(130)-C(131) | 1.47(3) |
| C(131)-N(108) | 1.55(2) |
| C(132)-O(105) | 1.20(2) |
| C(132)-N(108) | 1.27(3) |
| C(132)-C(133) | 1.57(3) |
| C(133)-N(107) | 1.45(3) |
| C(133)-C(134) | 1.53(3) |
| C(135)-O(107) | 1.22(2) |

|               |         |
|---------------|---------|
| C(135)-N(101) | 1.33(3) |
| C(136)-N(101) | 1.53(3) |
| C(137)-O(104) | 1.28(2) |
| C(137)-N(107) | 1.31(3) |
| C(201)-C(202) | 1.35(5) |
| C(201)-C(206) | 1.38(5) |
| C(202)-C(203) | 1.31(4) |
| C(203)-C(204) | 1.36(4) |
| C(204)-C(205) | 1.36(4) |
| C(204)-C(207) | 1.58(4) |
| C(205)-C(206) | 1.24(4) |
| C(207)-C(208) | 1.54(3) |
| C(208)-N(201) | 1.42(3) |
| C(208)-C(209) | 1.55(3) |
| C(209)-O(204) | 1.22(2) |
| C(209)-N(206) | 1.31(3) |
| C(210)-N(206) | 1.50(2) |
| C(210)-C(211) | 1.55(3) |
| C(211)-C(212) | 1.53(3) |
| C(212)-C(213) | 1.51(2) |
| C(213)-N(206) | 1.48(2) |
| C(213)-C(214) | 1.50(3) |
| C(214)-O(203) | 1.26(3) |
| C(214)-N(205) | 1.39(3) |
| C(215)-N(205) | 1.38(2) |
| C(215)-C(216) | 1.48(3) |
| C(215)-C(235) | 1.56(2) |
| C(216)-O(201) | 1.24(2) |
| C(216)-N(207) | 1.31(3) |
| C(217)-C(218) | 1.47(3) |
| C(217)-N(207) | 1.49(3) |
| C(217)-C(219) | 1.62(3) |
| C(219)-O(202) | 1.20(3) |
| C(219)-N(208) | 1.31(3) |
| C(220)-N(208) | 1.42(3) |
| C(220)-C(221) | 1.60(3) |
| C(221)-C(222) | 1.49(3) |
| C(222)-C(223) | 1.48(3) |
| C(223)-C(224) | 1.58(3) |

|               |         |
|---------------|---------|
| C(224)-N(202) | 1.46(3) |
| C(224)-C(236) | 1.53(3) |
| C(225)-O(207) | 1.21(3) |
| C(225)-N(202) | 1.29(3) |
| C(225)-C(226) | 1.57(3) |
| C(226)-N(203) | 1.49(3) |
| C(227)-O(208) | 1.29(3) |
| C(227)-N(203) | 1.34(3) |
| C(227)-C(228) | 1.45(3) |
| C(228)-N(204) | 1.47(2) |
| C(228)-C(229) | 1.58(3) |
| C(229)-C(230) | 1.51(3) |
| C(230)-C(232) | 1.48(3) |
| C(230)-C(231) | 1.60(3) |
| C(233)-O(206) | 1.28(2) |
| C(233)-N(204) | 1.39(2) |
| C(233)-C(234) | 1.45(3) |
| C(234)-C(235) | 1.50(3) |
| C(236)-O(205) | 1.25(2) |
| C(236)-N(201) | 1.41(3) |
| C(237)-N(201) | 1.44(2) |

## Angles [°]

|                      |           |
|----------------------|-----------|
| C(106)-C(101)-C(102) | 126(4)    |
| C(101)-C(102)-C(103) | 114(4)    |
| C(104)-C(103)-C(102) | 124(4)    |
| C(103)-C(104)-C(105) | 117(4)    |
| C(103)-C(104)-C(107) | 124(3)    |
| C(105)-C(104)-C(107) | 119(3)    |
| C(104)-C(105)-C(106) | 122(4)    |
| C(101)-C(106)-C(105) | 116(4)    |
| C(108)-C(107)-C(104) | 120(2)    |
| N(101)-C(108)-C(107) | 114.5(19) |
| N(101)-C(108)-C(109) | 111.6(17) |
| C(107)-C(108)-C(109) | 115.1(18) |
| O(106)-C(109)-N(102) | 122.3(18) |
| O(106)-C(109)-C(108) | 117.4(17) |
| N(102)-C(109)-C(108) | 119.8(18) |
| N(102)-C(110)-C(111) | 103.9(16) |
| C(110)-C(111)-C(112) | 103.3(16) |

|                      |           |
|----------------------|-----------|
| C(111)-C(112)-C(113) | 102.4(16) |
| N(102)-C(113)-C(114) | 119.4(15) |
| N(102)-C(113)-C(112) | 104.6(16) |
| C(114)-C(113)-C(112) | 112.7(16) |
| O(103)-C(114)-N(106) | 122.5(17) |
| O(103)-C(114)-C(113) | 125.2(15) |
| N(106)-C(114)-C(113) | 112.0(16) |
| N(106)-C(115)-C(116) | 111.0(16) |
| N(106)-C(115)-C(137) | 107.5(16) |
| C(116)-C(115)-C(137) | 110.5(15) |
| C(117)-C(116)-C(115) | 115.5(16) |
| C(116)-C(117)-C(118) | 114.7(16) |
| O(108)-C(118)-N(105) | 122.6(18) |
| O(108)-C(118)-C(117) | 123.2(18) |
| N(105)-C(118)-C(117) | 113.9(17) |
| N(105)-C(119)-C(124) | 109.9(15) |
| N(105)-C(119)-C(120) | 114.7(18) |
| C(124)-C(119)-C(120) | 108.1(17) |
| C(119)-C(120)-C(121) | 117.0(17) |
| C(120)-C(121)-C(122) | 111.5(17) |
| C(120)-C(121)-C(123) | 111.1(17) |
| C(122)-C(121)-C(123) | 110.5(17) |
| O(102)-C(124)-N(104) | 119.5(19) |
| O(102)-C(124)-C(119) | 122.8(19) |
| N(104)-C(124)-C(119) | 117.4(16) |
| N(104)-C(125)-C(126) | 115.8(19) |
| O(101)-C(126)-N(103) | 124.0(17) |
| O(101)-C(126)-C(125) | 120.0(18) |
| N(103)-C(126)-C(125) | 115.9(17) |
| N(103)-C(127)-C(128) | 112.2(17) |
| N(103)-C(127)-C(135) | 104.9(15) |
| C(128)-C(127)-C(135) | 109.9(17) |
| C(127)-C(128)-C(129) | 110.7(18) |
| C(130)-C(129)-C(128) | 113(2)    |
| C(131)-C(130)-C(129) | 114.3(18) |
| C(130)-C(131)-N(108) | 114.6(18) |
| O(105)-C(132)-N(108) | 126.9(19) |
| O(105)-C(132)-C(133) | 118.1(18) |
| N(108)-C(132)-C(133) | 115.0(18) |

|                      |           |
|----------------------|-----------|
| N(107)-C(133)-C(134) | 109.4(17) |
| N(107)-C(133)-C(132) | 107.7(17) |
| C(134)-C(133)-C(132) | 109.9(18) |
| O(107)-C(135)-N(101) | 123(2)    |
| O(107)-C(135)-C(127) | 119.2(19) |
| N(101)-C(135)-C(127) | 117.4(18) |
| O(104)-C(137)-N(107) | 123.4(19) |
| O(104)-C(137)-C(115) | 114.7(17) |
| N(107)-C(137)-C(115) | 120.9(17) |
| C(202)-C(201)-C(206) | 116(4)    |
| C(203)-C(202)-C(201) | 119(3)    |
| C(202)-C(203)-C(204) | 126(3)    |
| C(205)-C(204)-C(203) | 111(3)    |
| C(205)-C(204)-C(207) | 125(2)    |
| C(203)-C(204)-C(207) | 124(3)    |
| C(206)-C(205)-C(204) | 127(3)    |
| C(205)-C(206)-C(201) | 120(3)    |
| C(208)-C(207)-C(204) | 106.5(19) |
| N(201)-C(208)-C(207) | 113.1(18) |
| N(201)-C(208)-C(209) | 116.1(17) |
| C(207)-C(208)-C(209) | 112.0(17) |
| O(204)-C(209)-N(206) | 122.4(18) |
| O(204)-C(209)-C(208) | 120.5(18) |
| N(206)-C(209)-C(208) | 117.1(17) |
| N(206)-C(210)-C(211) | 102.9(16) |
| C(212)-C(211)-C(210) | 104.0(17) |
| C(213)-C(212)-C(211) | 104.3(15) |
| N(206)-C(213)-C(214) | 111.0(17) |
| N(206)-C(213)-C(212) | 105.5(13) |
| C(214)-C(213)-C(212) | 113.8(17) |
| O(203)-C(214)-N(205) | 123(2)    |
| O(203)-C(214)-C(213) | 119(2)    |
| N(205)-C(214)-C(213) | 117.3(17) |
| N(205)-C(215)-C(216) | 117.4(16) |
| N(205)-C(215)-C(235) | 110.9(15) |
| C(216)-C(215)-C(235) | 110.6(15) |
| O(201)-C(216)-N(207) | 120.5(19) |
| O(201)-C(216)-C(215) | 121.3(18) |
| N(207)-C(216)-C(215) | 117.2(18) |

|                      |           |
|----------------------|-----------|
| C(218)-C(217)-N(207) | 114.2(19) |
| C(218)-C(217)-C(219) | 107.8(19) |
| N(207)-C(217)-C(219) | 108.6(17) |
| O(202)-C(219)-N(208) | 127(2)    |
| O(202)-C(219)-C(217) | 118.7(17) |
| N(208)-C(219)-C(217) | 114(2)    |
| N(208)-C(220)-C(221) | 114.1(18) |
| C(222)-C(221)-C(220) | 111.6(18) |
| C(223)-C(222)-C(221) | 115(2)    |
| C(222)-C(223)-C(224) | 112.6(18) |
| N(202)-C(224)-C(236) | 109.0(15) |
| N(202)-C(224)-C(223) | 112.4(17) |
| C(236)-C(224)-C(223) | 109.0(15) |
| O(207)-C(225)-N(202) | 128(2)    |
| O(207)-C(225)-C(226) | 114.5(19) |
| N(202)-C(225)-C(226) | 117(2)    |
| N(203)-C(226)-C(225) | 112.3(17) |
| O(208)-C(227)-N(203) | 120.7(19) |
| O(208)-C(227)-C(228) | 122.9(18) |
| N(203)-C(227)-C(228) | 116.2(19) |
| C(227)-C(228)-N(204) | 110.0(17) |
| C(227)-C(228)-C(229) | 109.9(15) |
| N(204)-C(228)-C(229) | 109.4(16) |
| C(230)-C(229)-C(228) | 116.6(17) |
| C(232)-C(230)-C(229) | 112.3(18) |
| C(232)-C(230)-C(231) | 111.3(16) |
| C(229)-C(230)-C(231) | 106.8(17) |
| O(206)-C(233)-N(204) | 118.0(16) |
| O(206)-C(233)-C(234) | 122.9(18) |
| N(204)-C(233)-C(234) | 118.9(17) |
| C(233)-C(234)-C(235) | 118(2)    |
| C(234)-C(235)-C(215) | 113.3(18) |
| O(205)-C(236)-N(201) | 116.6(17) |
| O(205)-C(236)-C(224) | 124.2(18) |
| N(201)-C(236)-C(224) | 118.5(16) |
| C(135)-N(101)-C(108) | 118.5(17) |
| C(135)-N(101)-C(136) | 126.9(17) |
| C(108)-N(101)-C(136) | 114.5(17) |
| C(109)-N(102)-C(113) | 118.7(18) |



|                      |           |
|----------------------|-----------|
| C(109)-N(102)-C(110) | 127.1(18) |
| C(113)-N(102)-C(110) | 113.9(17) |
| C(126)-N(103)-C(127) | 120.3(16) |
| C(124)-N(104)-C(125) | 121.8(17) |
| C(118)-N(105)-C(119) | 119.3(18) |
| C(114)-N(106)-C(115) | 124.8(18) |
| C(137)-N(107)-C(133) | 119.2(18) |
| C(132)-N(108)-C(131) | 126.7(18) |
| C(236)-N(201)-C(208) | 118.5(15) |
| C(236)-N(201)-C(237) | 121.7(17) |
| C(208)-N(201)-C(237) | 119.0(17) |
| C(225)-N(202)-C(224) | 120.8(19) |
| C(227)-N(203)-C(226) | 124.0(18) |
| C(233)-N(204)-C(228) | 118.5(15) |
| C(215)-N(205)-C(214) | 124.3(16) |
| C(209)-N(206)-C(213) | 119.7(15) |
| C(209)-N(206)-C(210) | 128.3(16) |
| C(213)-N(206)-C(210) | 110.8(15) |
| C(216)-N(207)-C(217) | 122.1(18) |
| C(219)-N(208)-C(220) | 126(2)    |

**Table S20.** Anisotropic displacement parameters ( $\text{\AA}^2 \times 10^3$ ) for **32**. The anisotropic displacement factor exponent takes the form:  $-2\pi^2 [ h^2 a^{*2} U^{11} + \dots + 2 h k a^* b^* U^{12} ]$

|        | $U^{11}$ | $U^{22}$ | $U^{33}$ | $U^{23}$ | $U^{13}$ | $U^{12}$ |
|--------|----------|----------|----------|----------|----------|----------|
| C(101) | 76(14)   | 73(14)   | 81(14)   | -3(12)   | 1(12)    | -9(11)   |
| C(102) | 85(15)   | 91(16)   | 92(16)   | -12(12)  | 7(12)    | 6(12)    |
| C(103) | 83(15)   | 100(16)  | 89(16)   | -7(12)   | -8(12)   | -11(12)  |
| C(104) | 75(13)   | 58(13)   | 79(14)   | -11(11)  | 10(11)   | -3(11)   |
| C(105) | 77(14)   | 83(15)   | 70(14)   | 5(12)    | 8(11)    | -6(11)   |
| C(106) | 70(14)   | 85(15)   | 84(15)   | 7(12)    | -2(12)   | -6(12)   |
| C(107) | 37(10)   | 24(9)    | 38(10)   | -4(8)    | 9(8)     | 2(8)     |
| C(108) | 34(10)   | 37(10)   | 37(10)   | 10(9)    | -12(8)   | 2(8)     |
| C(109) | 19(8)    | 17(9)    | 21(9)    | -3(8)    | -10(7)   | -5(7)    |
| C(110) | 23(9)    | 29(9)    | 23(9)    | 6(8)     | 5(7)     | 4(7)     |
| C(111) | 27(9)    | 37(10)   | 24(9)    | 11(8)    | 4(8)     | -5(8)    |
| C(112) | 27(9)    | 26(9)    | 24(9)    | 4(8)     | -3(7)    | -10(7)   |
| C(113) | 21(8)    | 25(9)    | 14(8)    | -1(7)    | 3(7)     | 2(7)     |

|        |        |        |        |        |        |         |
|--------|--------|--------|--------|--------|--------|---------|
| C(114) | 11(4)  | 11(4)  | 10(4)  | 0(1)   | 0(1)   | 0(1)    |
| C(115) | 20(8)  | 24(9)  | 21(9)  | 11(8)  | -7(7)  | 5(7)    |
| C(116) | 24(6)  | 21(7)  | 12(6)  | 8(5)   | 0(5)   | 0(5)    |
| C(117) | 20(8)  | 18(9)  | 15(8)  | 1(7)   | -3(7)  | 6(7)    |
| C(118) | 8(7)   | 21(9)  | 18(8)  | 2(7)   | 5(6)   | 1(6)    |
| C(119) | 18(8)  | 31(10) | 22(9)  | 4(8)   | 6(7)   | -11(7)  |
| C(120) | 27(9)  | 23(9)  | 19(8)  | 5(8)   | 3(7)   | -10(7)  |
| C(121) | 25(9)  | 34(10) | 17(8)  | -3(8)  | -2(7)  | 3(8)    |
| C(122) | 19(9)  | 39(12) | 22(10) | -7(9)  | -6(8)  | -6(8)   |
| C(123) | 48(13) | 45(14) | 29(12) | 2(11)  | 1(10)  | 9(11)   |
| C(124) | 31(9)  | 29(9)  | 18(8)  | -8(8)  | 16(7)  | -13(8)  |
| C(125) | 31(9)  | 37(10) | 31(9)  | 6(9)   | 10(8)  | 7(8)    |
| C(126) | 17(8)  | 27(9)  | 19(8)  | -11(8) | 0(7)   | -1(7)   |
| C(127) | 20(8)  | 29(9)  | 28(9)  | -4(8)  | -1(7)  | 4(7)    |
| C(128) | 34(9)  | 34(10) | 18(8)  | -7(8)  | 3(8)   | 1(8)    |
| C(129) | 29(9)  | 43(11) | 25(9)  | -6(9)  | -6(8)  | 9(8)    |
| C(130) | 24(9)  | 41(10) | 32(10) | 2(9)   | 1(8)   | -6(8)   |
| C(131) | 29(9)  | 40(10) | 20(9)  | -7(8)  | 5(8)   | -12(8)  |
| C(132) | 23(8)  | 20(9)  | 25(9)  | -1(8)  | -7(7)  | 4(7)    |
| C(133) | 24(9)  | 35(10) | 30(9)  | 2(8)   | 1(8)   | -5(8)   |
| C(134) | 29(11) | 46(13) | 30(11) | 3(10)  | 8(9)   | -20(10) |
| C(135) | 30(9)  | 27(10) | 26(9)  | -8(8)  | -7(8)  | 8(8)    |
| C(136) | 22(11) | 50(14) | 68(16) | 19(13) | 11(11) | 3(10)   |
| C(137) | 22(6)  | 21(7)  | 19(7)  | 4(6)   | -7(5)  | 5(5)    |
| C(201) | 89(15) | 89(16) | 92(16) | 3(12)  | 6(12)  | 1(12)   |
| C(202) | 45(11) | 58(12) | 73(13) | 15(11) | 6(10)  | 14(10)  |
| C(203) | 75(14) | 77(14) | 68(14) | 14(11) | 7(11)  | 1(11)   |
| C(204) | 47(11) | 35(11) | 48(11) | -1(10) | 1(9)   | 3(9)    |
| C(205) | 47(11) | 57(12) | 52(12) | 4(10)  | 3(10)  | 1(10)   |
| C(206) | 58(12) | 54(12) | 65(13) | 2(11)  | 1(10)  | -3(10)  |
| C(207) | 37(10) | 43(11) | 46(11) | -11(9) | 3(9)   | -5(9)   |
| C(208) | 26(9)  | 31(10) | 29(9)  | 7(8)   | -12(8) | 1(8)    |
| C(209) | 29(9)  | 16(9)  | 22(9)  | 3(8)   | 1(8)   | 1(7)    |
| C(210) | 36(9)  | 27(9)  | 16(8)  | 5(8)   | 5(7)   | -3(8)   |
| C(211) | 33(9)  | 35(10) | 38(10) | 11(9)  | 9(8)   | -10(8)  |
| C(212) | 9(6)   | 10(6)  | 11(6)  | 3(5)   | -4(5)  | 1(5)    |
| C(213) | 8(7)   | 32(9)  | 19(8)  | 3(8)   | 7(7)   | 4(7)    |
| C(214) | 35(10) | 50(11) | 31(10) | -7(9)  | 10(8)  | -3(9)   |
| C(215) | 10(7)  | 15(8)  | 16(8)  | -4(7)  | -3(6)  | 4(6)    |

|        |        |        |        |         |        |        |
|--------|--------|--------|--------|---------|--------|--------|
| C(216) | 14(8)  | 31(10) | 20(9)  | 1(8)    | 8(7)   | 5(7)   |
| C(217) | 24(9)  | 41(10) | 25(9)  | 1(9)    | -6(8)  | -1(8)  |
| C(218) | 52(14) | 56(15) | 36(13) | -17(12) | -2(11) | -6(12) |
| C(219) | 31(10) | 34(10) | 44(11) | -3(9)   | 21(9)  | 6(8)   |
| C(220) | 21(9)  | 36(10) | 37(10) | 1(9)    | 16(8)  | 4(8)   |
| C(221) | 35(10) | 44(11) | 30(10) | -1(9)   | -4(8)  | -11(8) |
| C(222) | 23(9)  | 44(11) | 35(10) | -2(9)   | 1(8)   | -20(8) |
| C(223) | 28(9)  | 34(10) | 35(10) | -7(9)   | 8(8)   | 11(8)  |
| C(224) | 27(9)  | 27(9)  | 16(8)  | 3(8)    | -10(7) | -7(7)  |
| C(225) | 38(10) | 36(10) | 25(9)  | 4(8)    | -6(8)  | 9(9)   |
| C(226) | 23(9)  | 33(10) | 29(9)  | -8(8)   | 4(8)   | 0(7)   |
| C(227) | 31(9)  | 27(9)  | 23(9)  | 2(8)    | 20(8)  | 0(8)   |
| C(228) | 23(8)  | 28(9)  | 13(8)  | 0(7)    | -3(7)  | 7(7)   |
| C(229) | 26(9)  | 29(9)  | 19(8)  | -5(8)   | -16(7) | -10(7) |
| C(230) | 32(9)  | 32(10) | 23(9)  | -1(8)   | -18(8) | 4(8)   |
| C(231) | 28(9)  | 33(10) | 17(9)  | -3(8)   | -6(7)  | -17(8) |
| C(232) | 24(10) | 45(13) | 16(9)  | -7(9)   | 11(8)  | 3(9)   |
| C(233) | 16(8)  | 19(9)  | 15(8)  | 2(7)    | -2(7)  | -12(7) |
| C(234) | 38(10) | 38(10) | 26(9)  | 2(9)    | -2(8)  | 0(8)   |
| C(235) | 27(9)  | 32(10) | 25(9)  | 1(8)    | 1(8)   | 5(8)   |
| C(236) | 23(9)  | 28(9)  | 18(8)  | 4(8)    | -5(7)  | -7(7)  |
| C(237) | 36(12) | 51(14) | 29(11) | 15(10)  | 21(10) | 14(10) |
| N(101) | 27(10) | 37(11) | 37(11) | 21(9)   | -13(8) | 2(8)   |
| N(102) | 33(10) | 30(10) | 27(10) | 10(9)   | 8(8)   | -5(8)  |
| N(103) | 37(8)  | 22(8)  | 12(7)  | -5(7)   | 6(6)   | 15(7)  |
| N(104) | 16(8)  | 48(12) | 10(8)  | 7(8)    | 0(6)   | 3(8)   |
| N(105) | 8(8)   | 53(12) | 15(8)  | 9(8)    | -3(6)  | -8(7)  |
| N(106) | 38(11) | 47(12) | 17(9)  | -5(9)   | 14(8)  | -3(9)  |
| N(107) | 25(9)  | 37(11) | 29(10) | 1(9)    | 0(8)   | 2(8)   |
| N(108) | 17(7)  | 47(9)  | 23(8)  | 0(8)    | -7(6)  | 2(7)   |
| N(201) | 30(8)  | 25(8)  | 20(8)  | 18(7)   | 7(6)   | 1(7)   |
| N(202) | 19(8)  | 37(10) | 13(8)  | 1(8)    | 2(7)   | -3(7)  |
| N(203) | 19(9)  | 25(10) | 35(10) | 0(8)    | 1(7)   | 6(7)   |
| N(204) | 17(8)  | 9(8)   | 35(10) | 0(7)    | 13(7)  | 3(6)   |
| N(205) | 24(6)  | 15(6)  | 20(6)  | 4(5)    | -2(5)  | -11(5) |
| N(206) | 30(8)  | 15(7)  | 19(7)  | 10(7)   | 3(6)   | 2(6)   |
| N(207) | 14(7)  | 36(9)  | 29(8)  | 2(7)    | -4(6)  | -7(6)  |
| N(208) | 30(10) | 33(10) | 18(9)  | -3(8)   | 17(7)  | 0(8)   |
| O(101) | 15(7)  | 52(10) | 34(9)  | -2(8)   | -2(6)  | 13(7)  |

|        |        |        |        |        |        |        |
|--------|--------|--------|--------|--------|--------|--------|
| O(102) | 29(8)  | 38(9)  | 43(10) | 11(8)  | 14(7)  | 3(7)   |
| O(103) | 34(8)  | 22(8)  | 27(8)  | 10(6)  | 10(6)  | -8(6)  |
| O(104) | 11(6)  | 41(9)  | 17(7)  | 14(6)  | 1(5)   | -12(6) |
| O(105) | 39(9)  | 36(9)  | 12(7)  | 8(7)   | -17(6) | -10(7) |
| O(106) | 36(9)  | 36(9)  | 39(10) | -15(8) | 4(7)   | 1(7)   |
| O(107) | 32(8)  | 40(9)  | 23(8)  | 15(7)  | 0(6)   | 7(7)   |
| O(108) | 42(9)  | 19(8)  | 16(7)  | 2(6)   | 2(6)   | -6(6)  |
| O(201) | 47(10) | 44(10) | 26(8)  | 12(8)  | -4(7)  | -6(8)  |
| O(202) | 39(9)  | 48(10) | 18(8)  | 4(8)   | -7(6)  | 0(7)   |
| O(203) | 28(8)  | 52(10) | 15(7)  | -5(7)  | -8(6)  | -22(7) |
| O(204) | 31(8)  | 31(8)  | 22(8)  | 3(7)   | 10(6)  | 2(6)   |
| O(205) | 29(8)  | 49(10) | 12(7)  | 1(7)   | 11(6)  | -2(7)  |
| O(206) | 21(7)  | 41(10) | 22(8)  | 9(7)   | 3(6)   | 4(6)   |
| O(207) | 43(10) | 39(10) | 28(8)  | -3(7)  | -8(7)  | -16(7) |
| O(208) | 23(7)  | 24(8)  | 28(8)  | 5(7)   | 1(6)   | -1(6)  |

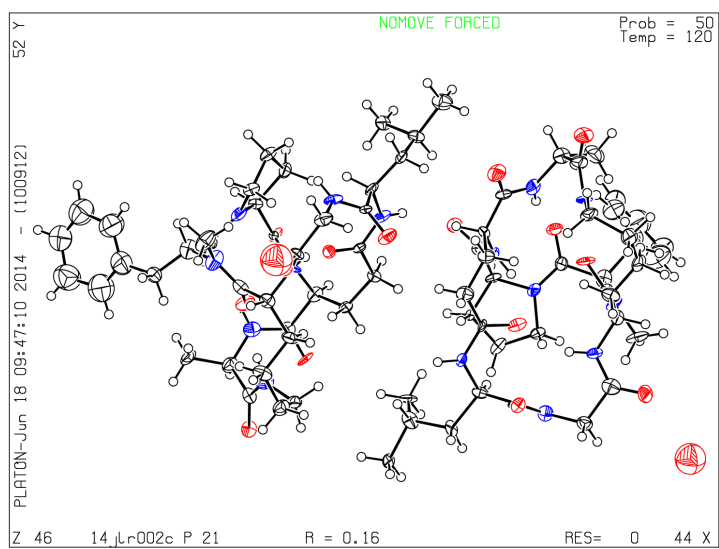

### Comparing BBP with $\alpha$ -helices

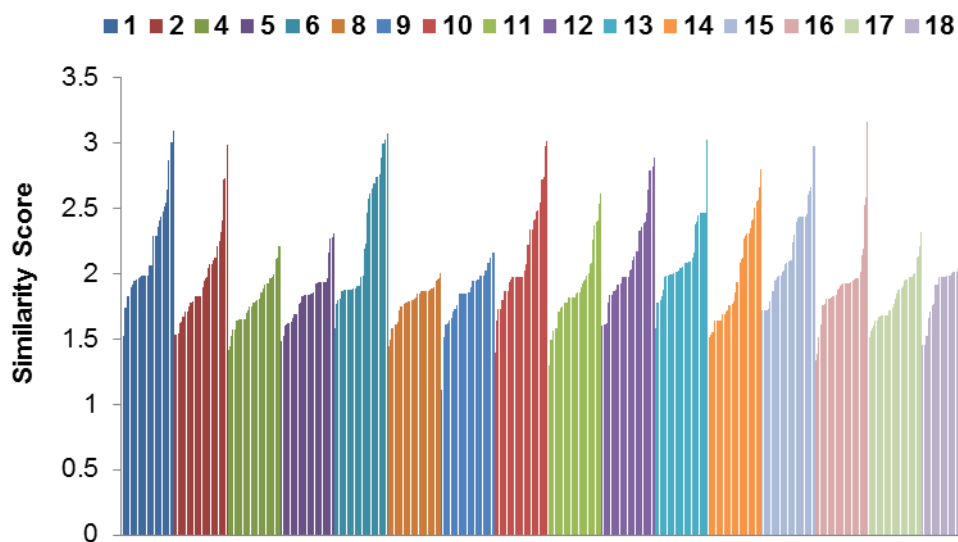

**Figure S1.** Similarity scores from 35 residue triplets from  $\alpha$ -helix and 18 norbornapeptides. BBP **10**, **12**, **13** and **15** uses X-ray structures. BBP **16** uses the *s-cis* conformation which is the majority conformation in the solution.

**Distance constraints from NMR****Table S21.** H-H distances obtained with ROESY experiments.

| <b>1</b>       |                |                              |
|----------------|----------------|------------------------------|
| Atom A         | Atom B         | Upper Distance Restraint (Å) |
| LEU-NH         | LEU-H $\alpha$ | 2.3                          |
| LEU-H $\alpha$ | GLY-NH         | 2.2                          |
| GLY-NH         | GLY-H $\alpha$ | 2.5                          |
| GLY-H $\alpha$ | LYS-NH         | 3.4                          |
| GLY-NH         | LYS-NH         | 2.3                          |
| LYS-NH         | LYS-H $\alpha$ | 2.6                          |
| LYS-NHZ        | ALA-H $\alpha$ | 3.0                          |
| PHE-NH         | PHE-H $\alpha$ | 2.0                          |
| <b>2</b>       |                |                              |
| Atom A         | Atom B         | Upper Distance Restraint (Å) |
| GLY-NH         | LYS-NH         | 2.5                          |
| PHE-NH         | GLU-NH         | 3.5                          |
| PHE-NH         | ALA-NH         | 3.9                          |
| GLY-NH         | LEU-NH         | 3.3                          |
| LEU-NH         | LYS-NH         | 3.6                          |
| ALA-NH         | GLU-NH         | 2.8                          |
| ALA-NH         | LYS-NHZ        | 2.8                          |
| PHE-NH         | LYS-H $\alpha$ | 2.3                          |
| PHE-NH         | PHE-H $\alpha$ | 2.1                          |
| GLY-NH         | GLY-H $\alpha$ | 2.4                          |
| GLY-NH         | LEU-H $\alpha$ | 2.2                          |
| ALA-NH         | ALA-H $\alpha$ | 2.3                          |
| ALA-NH         | GLU-H $\alpha$ | 2.4                          |
| ALA-NH         | PRO-H $\alpha$ | 3.8                          |
| LYS-NHZ        | ALA-H $\alpha$ | 2.4                          |
| GLU-NH         | GLU-H $\alpha$ | 2.7                          |
| GLU-NH         | PRO-H $\alpha$ | 3.0                          |
| GLU-NH         | PHE-H $\alpha$ | 3.6                          |
| LYS-NH         | LEU-H $\alpha$ | 3.6                          |
| LYS-NH         | LYS-H $\alpha$ | 2.6                          |
| <b>4</b>       |                |                              |
| Atom A         | Atom B         | Upper Distance Restraint (Å) |
| GLY-NH         | LYS-NH         | 2.5                          |
| LYS-NHZ        | ALA-NH         | 3.2                          |
| GLY-NH         | GLY-H $\alpha$ | 2.5                          |
| GLY-NH         | LEU-H $\alpha$ | 2.2                          |
| LEU-NH         | LEU-H $\alpha$ | 2.8                          |
| ALA-NH         | GLU-H $\alpha$ | 3.3                          |
| GLU-NH         | GLU-H $\alpha$ | 2.8                          |
| LYS-NH         | GLY-H $\alpha$ | 3.3                          |
| LYS-NH         | LYS-H $\alpha$ | 2.8                          |

|                                 |                  |                              |
|---------------------------------|------------------|------------------------------|
| <b>LYS-NHZ</b>                  | ALA-H $\alpha$   | 2.7                          |
| <b>5</b>                        |                  |                              |
| Atom A                          | Atom B           | Upper Distance Restraint (Å) |
| <b>GLY-NH</b>                   | LYS-NH           | 2.3                          |
| <b>ALA-NH</b>                   | LYS-NHZ          | 2.6                          |
| <b>GLY-NH</b>                   | LEU-NH           | 2.9                          |
| <b>GLY-NH</b>                   | GLY-H $\alpha$   | 2.1                          |
| <b>GLY-NH</b>                   | LEU-H $\alpha$   | 1.9                          |
| <b>GLU-NH</b>                   | PRO-H $\alpha$   | 2.8                          |
| <b>GLU-NH</b>                   | GLU-H $\alpha$   | 2.4                          |
| <b>GLU-NH</b>                   | PHE-H $\alpha$   | 2.1                          |
| <b>ALA-NH</b>                   | ALA-H $\alpha$   | 2.4                          |
| <b>ALA-NH</b>                   | GLU-H $\alpha$   | 2.0                          |
| <b>LYS-NHZ</b>                  | ALA-H $\alpha$   | 2.2                          |
| <b>LYS-NH</b>                   | LYS-H $\alpha$   | 2.3                          |
| <b>LYS-NH</b>                   | GLY-H $\alpha$   | 2.9                          |
| <b>6</b>                        |                  |                              |
| Atom A                          | Atom B           | Upper Distance Restraint (Å) |
| <b>GLY-NH</b>                   | LYS-NH           | 2.2                          |
| <b>GLY-NH</b>                   | LEU-NH           | 2.8                          |
| <b>ALA-NH</b>                   | LYS-NHZ          | 2.5                          |
| <b>PHE-NH</b>                   | PHE-H $\beta$    | 2.2                          |
| <b>PHE-NH</b>                   | PHE-H $\alpha$   | 1.8                          |
| <b>GLY-NH</b>                   | LEU-H $\alpha$   | 1.9                          |
| <b>LEU-NH</b>                   | LEU-H $\alpha$   | 2.4                          |
| <b>ALA-NH</b>                   | ALA-H $\alpha$   | 2.1                          |
| <b>ALA-NH</b>                   | GLU-H $\alpha$   | 2.1                          |
| <b>LYS-NHZ</b>                  | GLU-H $\beta$    | 2.8                          |
| <b>LYS-NHZ</b>                  | LYS-H $\epsilon$ | 2.3                          |
| <b>LYS-NHZ</b>                  | ALA-H $\alpha$   | 2.2                          |
| <b>LYS-NH</b>                   | LYS-H $\alpha$   | 2.3                          |
| <b>8</b>                        |                  |                              |
| Atom A                          | Atom B           | Upper Distance Restraint (Å) |
| <b>LYS-NH</b>                   | PHE-H $\alpha$   | 4.0                          |
| <b>LYS-H<math>\alpha</math></b> | GLU-NH           | 3.7                          |
| <b>GLY-NH</b>                   | LYS-H $\alpha$   | 2.4                          |
| <b>LYS-NHZ</b>                  | ALA-NH           | 2.7                          |
| <b>PRO-H<math>\alpha</math></b> | GLU-NH           | 3.0                          |
| <b>GLU-NH</b>                   | GLU-H $\alpha$   | 2.6                          |
| <b>PHE-H<math>\alpha</math></b> | GLU-NH           | 2.3                          |
| <b>GLY-NH</b>                   | GLY-H $\alpha$   | 2.3                          |
| <b>LEU-NH</b>                   | LEU-H $\alpha$   | 2.0                          |
| <b>ALA-NH</b>                   | ALA-H $\alpha$   | 2.5                          |
| <b>GLU-H<math>\alpha</math></b> | ALA-NH           | 2.2                          |
| <b>LYS-NHZ</b>                  | ALA-H $\alpha$   | 2.5                          |
| <b>GLY-H<math>\alpha</math></b> | LYS-NH           | 2.7                          |

|                                 |                |     |
|---------------------------------|----------------|-----|
| <b>LYS-NH</b>                   | LYS-H $\alpha$ | 2.2 |
| <b>PHE-H<math>\alpha</math></b> | PRO-H $\alpha$ | 2.0 |

**9**

| Atom A         | Atom B           | Upper Distance Restraint (Å) |
|----------------|------------------|------------------------------|
| <b>GLY-NH</b>  | LYS-NH           | 2.6                          |
| <b>GLY-NH</b>  | LEU-NH           | 3.0                          |
| <b>GLU-NH</b>  | ALA-NH           | 2.9                          |
| <b>GLY-NH</b>  | GLY-H $\alpha$   | 2.5                          |
| <b>GLY-NH</b>  | LEU-H $\alpha$   | 2.6                          |
| <b>GLU-NH</b>  | GLU-H $\alpha$   | 2.2                          |
| <b>PHE-NH</b>  | LYS-H $\alpha$   | 2.4                          |
| <b>LEU-NH</b>  | LEU-H $\alpha$   | 3.7                          |
| <b>LYS-NHZ</b> | LYS-H $\epsilon$ | 2.6                          |
| <b>ALA-NH</b>  | ALA-H $\alpha$   | 2.6                          |
| <b>LYS-NH</b>  | GLY-H $\alpha$   | 3.0                          |
| <b>LYS-NH</b>  | LYS-H $\alpha$   | 2.7                          |

**10**

| Atom A         | Atom B           | Upper Distance Restraint (Å) |
|----------------|------------------|------------------------------|
| <b>TYR-NH</b>  | GLU-NH           | 3.6                          |
| <b>TYR-NH</b>  | LYS-NH           | 2.8                          |
| <b>GLY-NH</b>  | LYS-NH           | 2.2                          |
| <b>LYS-NH</b>  | GLU-NH           | 3.0                          |
| <b>TYR-NH</b>  | PRO-H $\delta$   | 2.9                          |
| <b>TYR-NH</b>  | TYR-H $\alpha$   | 2.1                          |
| <b>TYR-NH</b>  | LYS-H $\alpha$   | 2.0                          |
| <b>GLY-NH</b>  | GLY-H $\alpha$   | 2.4                          |
| <b>GLY-NH</b>  | LEU-H $\alpha$   | 2.3                          |
| <b>LEU-NH</b>  | GLU-H $\gamma$   | 2.2                          |
| <b>LEU-NH</b>  | LEU-H $\alpha$   | 2.7                          |
| <b>LYS-NH</b>  | GLY-H $\alpha$   | 3.3                          |
| <b>LYS-NH</b>  | LYS-H $\alpha$   | 2.5                          |
| <b>ALA-NH</b>  | LYS-H $\epsilon$ | 3.2                          |
| <b>ALA-NH</b>  | GLU-H $\alpha$   | 3.2                          |
| <b>ALA-NH</b>  | ALA-H $\alpha$   | 2.6                          |
| <b>GLU-NH</b>  | GLU-H $\alpha$   | 2.7                          |
| <b>GLU-NH</b>  | ALA-H $\alpha$   | 2.9                          |
| <b>LYS-NHZ</b> | LYS-H $\epsilon$ | 2.4                          |
| <b>LYS-NHZ</b> | ALA-H $\alpha$   | 3.0                          |

**11**

| Atom A        | Atom B         | Upper Distance Restraint (Å) |
|---------------|----------------|------------------------------|
| <b>GLY-NH</b> | LYS-NH         | 2.3                          |
| <b>GLY-NH</b> | LEU-NH         | 2.8                          |
| <b>ALA-NH</b> | GLU-NH         | 2.6                          |
| <b>ALA-NH</b> | LYS-NHZ        | 2.5                          |
| <b>GLY-NH</b> | GLY-H $\alpha$ | 2.2                          |
| <b>GLY-NH</b> | LEU-H $\alpha$ | 2.0                          |



|                                 |                  |     |
|---------------------------------|------------------|-----|
| <b>TYR-NH</b>                   | TYR-H $\alpha$   | 1.8 |
| <b>ALA-NH</b>                   | ALA-H $\alpha$   | 2.2 |
| <b>ALA-NH</b>                   | GLU-H $\alpha$   | 2.1 |
| <b>LEU-NH</b>                   | LEU-H $\alpha$   | 2.3 |
| <b>LYS-NHZ</b>                  | LYS-H $\epsilon$ | 2.3 |
| <b>LYS-NHZ</b>                  | ALA-H $\alpha$   | 2.2 |
| <b>GLU-NH</b>                   | PRO-H $\delta$   | 2.5 |
| <b>GLU-NH</b>                   | GLU-H $\alpha$   | 2.5 |
| <b>GLU-NH</b>                   | PRO-H $\alpha$   | 2.6 |
| <b>LYS-NH</b>                   | PRO-H $\delta$   | 2.9 |
| <b>LYS-NH</b>                   | GLY-H $\alpha$   | 2.9 |
| <b>LYS-NH</b>                   | LYS-H $\alpha$   | 2.3 |
| <b>TYR-H<math>\alpha</math></b> | PRO-H $\delta$   | 2.0 |

**12 (trans)**

| Atom A         | Atom B         | Upper Distance Restraint (Å) |
|----------------|----------------|------------------------------|
| <b>TYR-NH</b>  | TYR-H $\delta$ | 2.6                          |
| <b>TYR-NH</b>  | ALA-NH         | 3.6                          |
| <b>TYR-NH</b>  | LYS-NH         | 2.8                          |
| <b>GLY-NH</b>  | LYS-NH         | 2.2                          |
| <b>LYS-NH</b>  | GLU-NH         | 2.9                          |
| <b>TYR-NH</b>  | TYR-H $\alpha$ | 2.3                          |
| <b>TYR-NH</b>  | LYS-H $\alpha$ | 1.9                          |
| <b>GLY-NH</b>  | LEU-H $\alpha$ | 2.1                          |
| <b>GLY-NH</b>  | GLY-H $\alpha$ | 2.5                          |
| <b>GLY-NH</b>  | TYR-H $\alpha$ | 2.9                          |
| <b>LEU-NH</b>  | LEU-H $\alpha$ | 2.7                          |
| <b>LYS-NH</b>  | LEU-H $\alpha$ | 2.9                          |
| <b>LYS-NH</b>  | GLY-H $\alpha$ | 2.9                          |
| <b>LYS-NH</b>  | LYS-H $\alpha$ | 2.4                          |
| <b>GLU-NH</b>  | GLU-H $\alpha$ | 2.4                          |
| <b>ALA-NH</b>  | ALA-H $\alpha$ | 2.3                          |
| <b>LYS-NHZ</b> | ALA-H $\alpha$ | 2.8                          |
| <b>TYR-NH</b>  | PRO-H $\delta$ | 2.6                          |
| <b>LEU-NH</b>  | GLU-H $\gamma$ | 2.3                          |

**12 (cis)**

| Atom A                          | Atom B         | Upper Distance Restraint (Å) |
|---------------------------------|----------------|------------------------------|
| <b>TYR-H<math>\alpha</math></b> | PRO-H $\alpha$ | 1.8                          |
| <b>TYR-NH</b>                   | LYS-NH         | 2.6                          |
| <b>TYR-NH</b>                   | TYR-H $\delta$ | 2.5                          |
| <b>GLU-NH</b>                   | LYS-NH         | 2.8                          |
| <b>GLU-NH</b>                   | ALA-NH         | 2.2                          |
| <b>GLY-NH</b>                   | LYS-NH         | 2.0                          |
| <b>ALA-NH</b>                   | LYS-NHZ        | 2.0                          |
| <b>TYR-NH</b>                   | LYS-H $\alpha$ | 1.9                          |
| <b>TYR-NH</b>                   | TYR-H $\alpha$ | 2.1                          |
| <b>GLU-NH</b>                   | GLU-H $\alpha$ | 2.3                          |
| <b>GLU-NH</b>                   | LUE-H $\alpha$ | 2.9                          |

|                                 |                |     |
|---------------------------------|----------------|-----|
| <b>GLU-NH</b>                   | TYR-H $\alpha$ | 2.2 |
| <b>GLY-NH</b>                   | LEU-H $\alpha$ | 1.7 |
| <b>LEU-NH</b>                   | LEU-H $\alpha$ | 2.2 |
| <b>ALA-NH</b>                   | GLU-H $\alpha$ | 2.5 |
| <b>ALA-NH</b>                   | ALA-H $\alpha$ | 2.3 |
| <b>ALA-NH</b>                   | TYR-H $\alpha$ | 2.3 |
| <b>LYS-NHZ</b>                  | ALA-H $\alpha$ | 2.2 |
| <b>TYR-H<math>\delta</math></b> | PRO-H $\alpha$ | 2.5 |
| <b>TYR-H<math>\delta</math></b> | TYR-H $\alpha$ | 2.1 |
| <b>LYS-NH</b>                   | LYS-H $\alpha$ | 2.3 |
| <b>LEU-NH</b>                   | GLU-H $\gamma$ | 2.3 |

## 13

| Atom A         | Atom B         | Upper Distance Restraint (Å) |
|----------------|----------------|------------------------------|
| <b>GLY-NH</b>  | LYS-NH         | 2.8                          |
| <b>TYR-NH</b>  | TYR-H $\alpha$ | 2.8                          |
| <b>TYR-NH</b>  | LYS-H $\alpha$ | 2.4                          |
| <b>GLY-NH</b>  | LEU-H $\alpha$ | 2.6                          |
| <b>LEU-NH</b>  | LEU-H $\alpha$ | 3.1                          |
| <b>GLU-NH</b>  | GLU-H $\alpha$ | 2.3                          |
| <b>LYS-NHZ</b> | ALA-H $\alpha$ | 3.1                          |

## 14

| Atom A                          | Atom B         | Upper Distance Restraint (Å) |
|---------------------------------|----------------|------------------------------|
| <b>GLY-NH</b>                   | LYS-NH         | 2.4                          |
| <b>ALA-NH</b>                   | LYS-NHZ        | 2.7                          |
| <b>GLY-NH</b>                   | GLY-H $\alpha$ | 2.3                          |
| <b>GLY-NH</b>                   | LEU-H $\alpha$ | 2.0                          |
| <b>TYR-NH</b>                   | LYS-H $\alpha$ | 2.0                          |
| <b>GLU-NH</b>                   | PRO-H $\delta$ | 3.0                          |
| <b>GLU-NH</b>                   | GLU-H $\alpha$ | 2.5                          |
| <b>GLU-NH</b>                   | TYR-H $\alpha$ | 2.0                          |
| <b>ALA-NH</b>                   | ALA-H $\alpha$ | 2.5                          |
| <b>ALA-NH</b>                   | GLU-H $\alpha$ | 2.1                          |
| <b>LEU-NH</b>                   | LEU-H $\alpha$ | 2.5                          |
| <b>LYS-NHZ</b>                  | ALA-H $\alpha$ | 2.3                          |
| <b>LYS-NH</b>                   | GLY-H $\alpha$ | 2.9                          |
| <b>LYS-NH</b>                   | LYS-H $\alpha$ | 2.5                          |
| <b>TYR-H<math>\alpha</math></b> | PRO-H $\alpha$ | 1.8                          |

## 15

| Atom A        | Atom B         | Upper Distance Restraint (Å) |
|---------------|----------------|------------------------------|
| <b>GLY-NH</b> | LYS-NH         | 1.9                          |
| <b>LEU-NH</b> | LYS-NH         | 2.3                          |
| <b>ALA-NH</b> | GLU-NH         | 2.4                          |
| <b>ALA-NH</b> | LYS-NHZ        | 2.4                          |
| <b>TYR-NH</b> | TYR-H $\beta$  | 2.0                          |
| <b>TYR-NH</b> | TYR-H $\alpha$ | 1.7                          |
| <b>GLY-NH</b> | GLY-H $\alpha$ | 1.8                          |

|                |                  |     |
|----------------|------------------|-----|
| <b>GLY-NH</b>  | LEU-H $\alpha$   | 1.8 |
| <b>LEU-NH</b>  | GLU-H $\beta$    | 2.7 |
| <b>LEU-NH</b>  | GLU-H $\gamma$   | 2.0 |
| <b>LEU-NH</b>  | LEU-H $\alpha$   | 2.1 |
| <b>ALA-NH</b>  | GLU-H $\beta$    | 2.3 |
| <b>ALA-NH</b>  | GLU-H $\gamma$   | 2.6 |
| <b>ALA-NH</b>  | ALA-H $\alpha$   | 1.9 |
| <b>ALA-NH</b>  | GLU-H $\alpha$   | 1.9 |
| <b>LYS-NHZ</b> | LYS-H $\beta$    | 2.5 |
| <b>LYS-NHZ</b> | LYS-H $\epsilon$ | 2.0 |
| <b>LYS-NHZ</b> | ALA-H $\alpha$   | 2.0 |
| <b>GLU-NH</b>  | LEU-H $\alpha$   | 2.3 |
| <b>GLU-NH</b>  | PRO-H $\alpha$   | 2.3 |
| <b>GLU-NH</b>  | GLU-H $\alpha$   | 2.0 |
| <b>LYS-NH</b>  | LYS-H $\alpha$   | 1.7 |

**16 (cis)**

| Atom A                          | Atom B         | Upper Distance Restraint (Å) |
|---------------------------------|----------------|------------------------------|
| <b>GLU-NH</b>                   | LYS-NH         | 3.3                          |
| <b>GLY-NH</b>                   | LYS-NH         | 3.0                          |
| <b>TYR-NH</b>                   | LYS-H $\alpha$ | 2.5                          |
| <b>GLU-NH</b>                   | TYR-H $\alpha$ | 2.1                          |
| <b>GLY-NH</b>                   | GLY-H $\alpha$ | 3.2                          |
| <b>GLY-NH</b>                   | LEU-H $\alpha$ | 2.7                          |
| <b>LEU-NH</b>                   | GLU-H $\gamma$ | 2.7                          |
| <b>LEU-NH</b>                   | LEU-H $\alpha$ | 3.1                          |
| <b>TYR-H<math>\delta</math></b> | TYR-H $\alpha$ | 2.3                          |
| <b>LYS-NH</b>                   | GLY-H $\alpha$ | 3.3                          |
| <b>LYS-NH</b>                   | LYS-H $\alpha$ | 2.6                          |
| <b>TYR-H<math>\delta</math></b> | PRO-H $\delta$ | 2.8                          |
| <b>TYR-H<math>\alpha</math></b> | PRO-H $\alpha$ | 2.0                          |

**16 (trans)**

| Atom A                          | Atom B         | Upper Distance Restraint (Å) |
|---------------------------------|----------------|------------------------------|
| <b>TYR-NH</b>                   | LYS-NHZ        | 3.4                          |
| <b>GLY-NH</b>                   | LYS-NH         | 3.1                          |
| <b>TYR-NH</b>                   | TYR-H $\alpha$ | 3.3                          |
| <b>TYR-NH</b>                   | LYS-H $\alpha$ | 2.5                          |
| <b>GLY-NH</b>                   | LEU-H $\alpha$ | 2.9                          |
| <b>LYS-NH</b>                   | LYS-H $\alpha$ | 2.8                          |
| <b>ALA-NH</b>                   | ALA-H $\alpha$ | 2.6                          |
| <b>GLU-NH</b>                   | GLU-H $\alpha$ | 2.6                          |
| <b>TYR-H<math>\delta</math></b> | TYR-H $\alpha$ | 2.4                          |

**17**

| Atom A         | Atom B         | Upper Distance Restraint (Å) |
|----------------|----------------|------------------------------|
| <b>GLY-NH</b>  | LYS-NH         | 2.3                          |
| <b>LYS-NHZ</b> | ALA-NH         | 2.7                          |
| <b>TYR-NH</b>  | TYR-H $\alpha$ | 2.6                          |

|                                 |                |     |
|---------------------------------|----------------|-----|
| <b>TYR-NH</b>                   | LYS-H $\alpha$ | 2.4 |
| <b>GLU-NH</b>                   | GLU-H $\alpha$ | 2.7 |
| <b>GLY-NH</b>                   | LEU-H $\alpha$ | 2.2 |
| <b>ALA-NH</b>                   | GLU-H $\alpha$ | 2.2 |
| <b>LYS-NHZ</b>                  | ALA-H $\alpha$ | 2.6 |
| <b>LYS-NH</b>                   | GLY-H $\alpha$ | 2.7 |
| <b>TYR-H<math>\alpha</math></b> | PRO-H $\alpha$ | 1.9 |

**18**

| Atom A         | Atom B           | Upper Distance Restraint (Å) |
|----------------|------------------|------------------------------|
| <b>GLY-NH</b>  | LYS-NH           | 2.5                          |
| <b>GLY-NH</b>  | LEU-NH           | 2.8                          |
| <b>GLU-NH</b>  | ALA-NH           | 2.8                          |
| <b>GLY-NH</b>  | GLY-H $\alpha$   | 2.3                          |
| <b>GLY-NH</b>  | LEU-H $\alpha$   | 2.3                          |
| <b>GLU-NH</b>  | TYR-H $\alpha$   | 3.3                          |
| <b>GLU-NH</b>  | GLU-H $\alpha$   | 2.1                          |
| <b>TYR-NH</b>  | LYS-H $\alpha$   | 2.3                          |
| <b>TYR-NH</b>  | TYR-H $\alpha$   | 2.6                          |
| <b>LEU-NH</b>  | LEU-H $\alpha$   | 2.6                          |
| <b>LYS-NHZ</b> | ALA-H $\alpha$   | 2.9                          |
| <b>ALA-NH</b>  | ALA-H $\alpha$   | 2.5                          |
| <b>LYS-NH</b>  | GLY-H $\alpha$   | 2.9                          |
| <b>LYS-NH</b>  | LYS-H $\alpha$   | 2.7                          |
| <b>LYS-NHZ</b> | LYS-H $\epsilon$ | 2.5                          |

**27c**

| Atom A                            | Atom B           | Upper Distance Restraint (Å) |
|-----------------------------------|------------------|------------------------------|
| <b>LYS-H<math>\alpha</math></b>   | TRP-HZ           | 2.8                          |
| <b>LYS-H<math>\beta</math></b>    | CYS-H $\alpha$   | 3.8                          |
| <b>GLU-H<math>\gamma</math></b>   | LYS-H $\alpha$   | 3.0                          |
| <b>LYS-H<math>\alpha</math></b>   | TRP-H $\epsilon$ | 2.9                          |
| <b>CYS-H<math>\beta</math></b>    | LYS-H $\alpha$   | 2.9                          |
| <b>TRP-H<math>\epsilon</math></b> | CYS-H $\alpha$   | 2.7                          |

## Synthesis and spectra of synthesized products

**1<sup>1</sup>Gk<sup>2</sup>fPE<sup>1</sup>a<sup>2</sup> (1).**

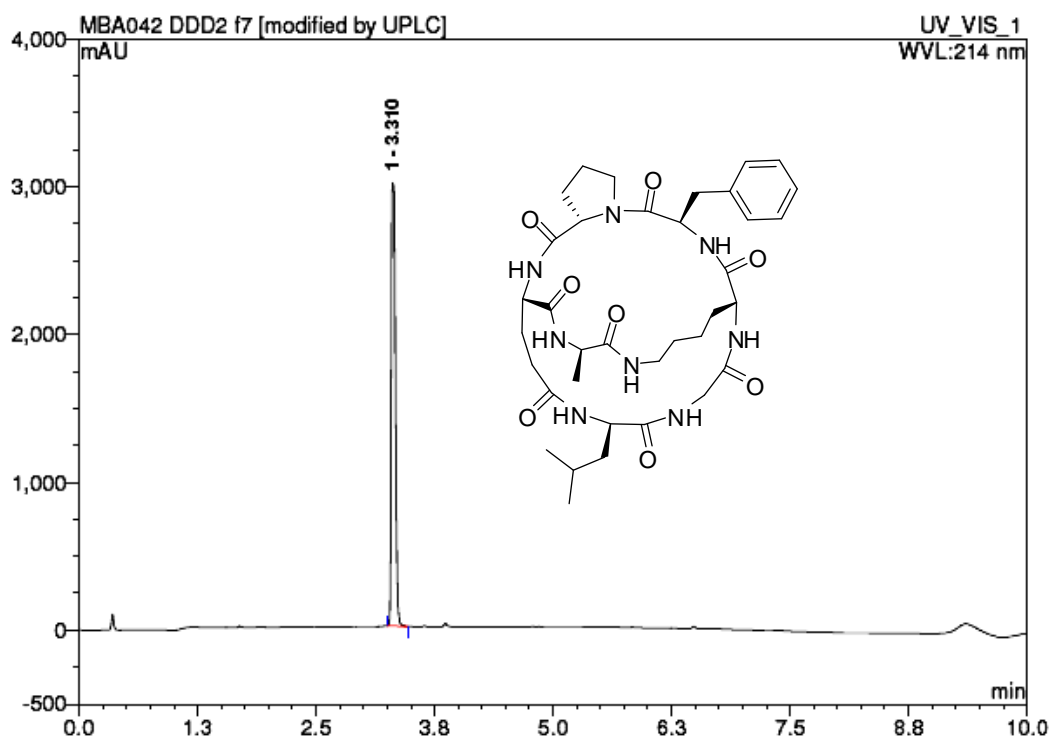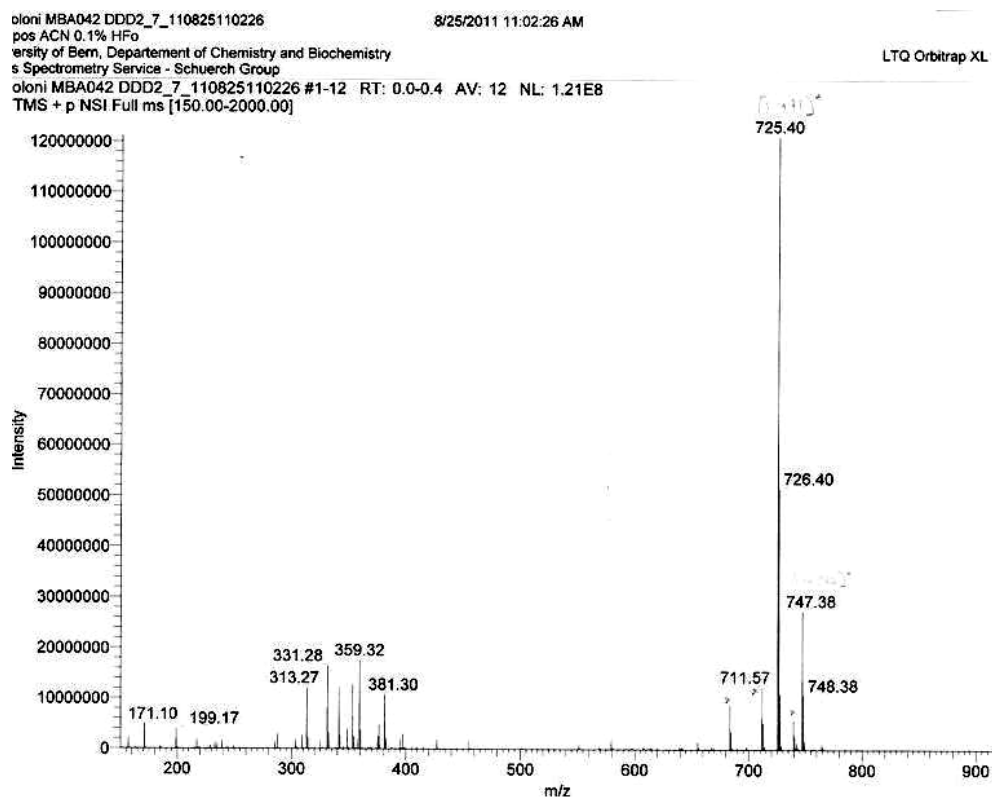

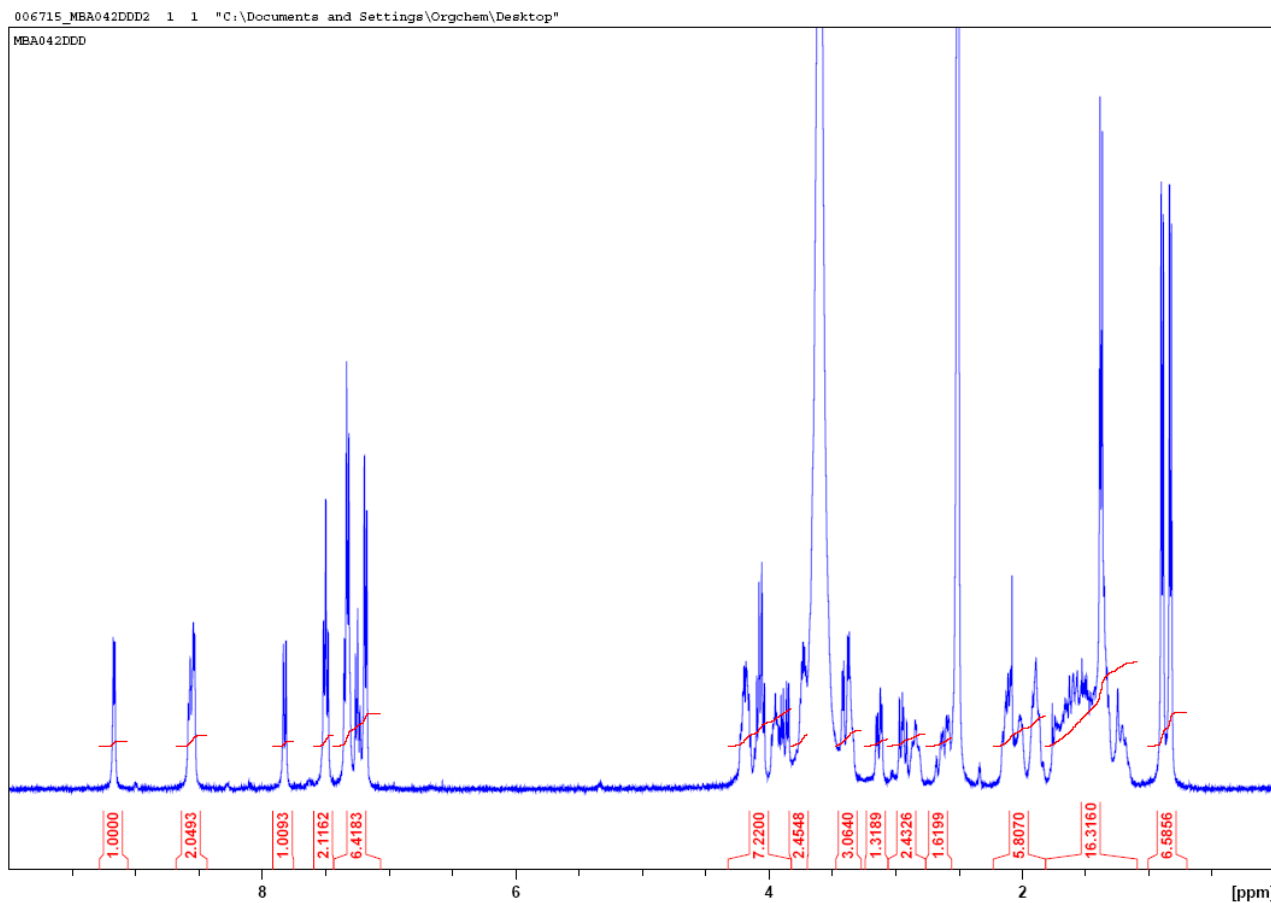

| <sup>1</sup> H-NMR (400 MHz, DMSO- <i>d</i> <sub>6</sub> ) |                    |         |                                 |
|------------------------------------------------------------|--------------------|---------|---------------------------------|
| residue                                                    | proton             | δ (ppm) | J (Hz)                          |
| leu <sup>1</sup>                                           | NH                 | 8.54    | <sup>3</sup> J(NH-αCH) = 4.33   |
|                                                            | αCH                | 3.74    |                                 |
|                                                            | β'CH               | 1.53    |                                 |
|                                                            | β''CH              | 1.36    |                                 |
|                                                            | γCH                | 1.66    |                                 |
|                                                            | δ'CH <sub>3</sub>  | 0.90    |                                 |
|                                                            | δ''CH <sub>3</sub> | 0.83    |                                 |
|                                                            | Gly <sup>2</sup>   | NH      | 8.57                            |
| α'CH                                                       |                    | 3.88    | <sup>3</sup> J(NH-α''CH) = 7.34 |
| α''CH                                                      |                    | 3.40    |                                 |
| lys <sup>3</sup>                                           | αNH                | 7.82    | <sup>3</sup> J(NH-αCH) = 8.48   |
|                                                            | αCH                | 4.21    |                                 |
|                                                            | βCH <sub>2</sub>   | 1.44    |                                 |
|                                                            | γ'CH               | 1.49    |                                 |
|                                                            | γ''CH              | 1.21    |                                 |
|                                                            | δ'CH               | 1.58    |                                 |
|                                                            | δ''CH              | 1.35    |                                 |
|                                                            | ε'CH               | 3.57    |                                 |
|                                                            | ε''CH              | 2.84    |                                 |
| phe <sup>4</sup>                                           | εNH                | 7.18    |                                 |
|                                                            | NH                 | 9.17    | <sup>3</sup> J(NH-αCH) = 5.41   |
|                                                            | αCH                | 4.17    |                                 |
|                                                            | β'CH               | 3.13    |                                 |
|                                                            | β''CH              | 2.96    |                                 |
| 2,6H                                                       | 7.19               |         |                                 |

|                  |                  |      |                               |
|------------------|------------------|------|-------------------------------|
| Pro <sup>5</sup> | 3,5H             | 7.34 |                               |
|                  | 4H               | 7.25 |                               |
|                  | αCH              | 4.06 |                               |
|                  | β'CH             | 2.11 |                               |
|                  | β''CH            | 1.61 |                               |
|                  | γ'CH             | 1.90 |                               |
| Glu <sup>6</sup> | γ''CH            | 1.74 |                               |
|                  | δ'CH             | 3.65 |                               |
|                  | δ''CH            | 3.36 |                               |
|                  | NH               | 7.49 | <sup>3</sup> J(NH-αCH) = 6.86 |
|                  | αCH              | 3.95 |                               |
| ala <sup>7</sup> | β'CH             | 2.02 |                               |
|                  | β''CH            | 1.90 |                               |
|                  | γ'CH             | 2.62 |                               |
|                  | γ''CH            | 2.13 |                               |
|                  | NH               | 7.51 | <sup>3</sup> J(NH-αCH) = 6.02 |
|                  | αCH              | 4.09 |                               |
|                  | βCH <sub>3</sub> | 1.38 |                               |

$1^1Gk^2fPE^1A^2$  (2).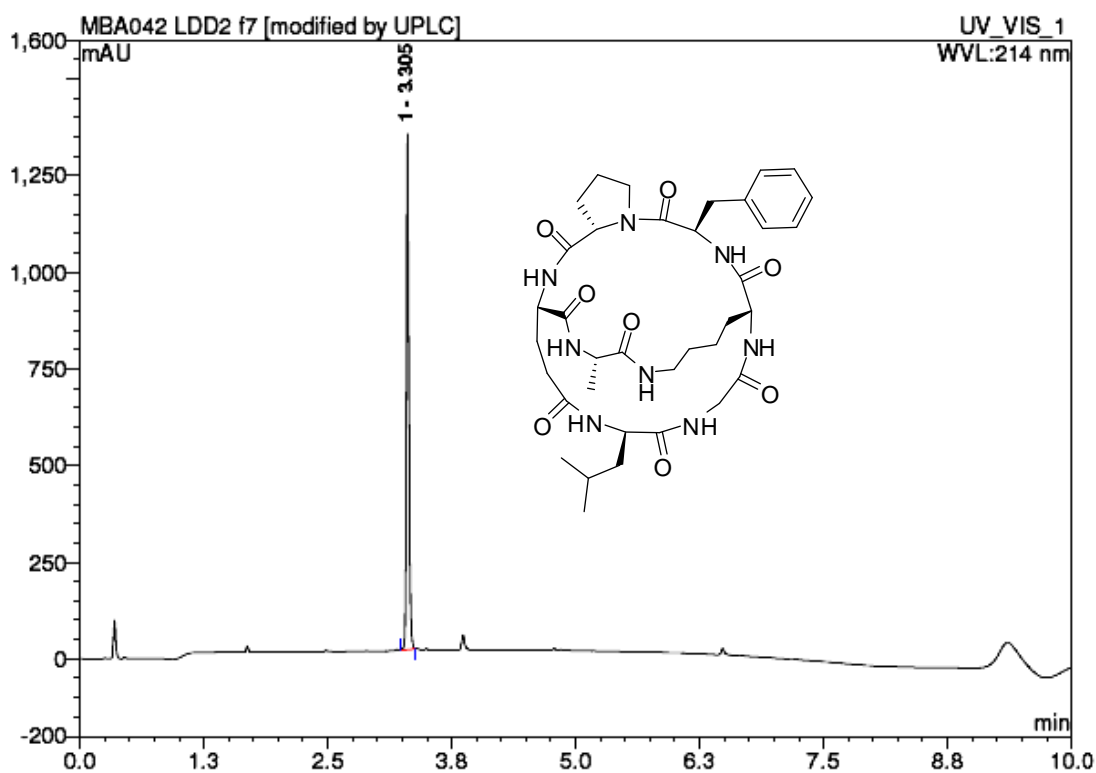

Bartoloni MBA042LDD2\_120307134633 3/7/2012 3:02:24 PM  
NSI pos ACN + 0.1% HFO  
University of Bern, Department of Chemistry and Biochemistry  
Mass Spectrometry Service, Schuerch Group  
Bartoloni MBA042LDD2\_120307134633 #1-16 RT: 0.0-0.4 AV: 16 NL: 1.63E8  
T: FTMS + p NSI Full ms [150.00-2000.00]

MBA042LDD2  
LTQ Orbitrap XL

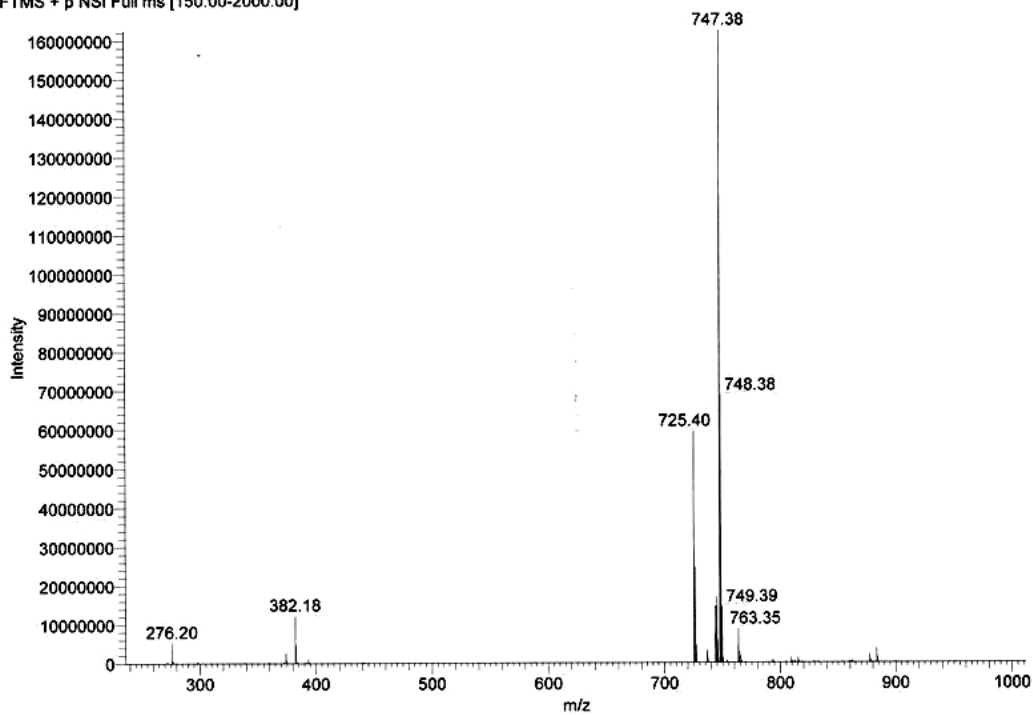

006713\_MBA042LDD2 2 1 "C:\Documents and Settings\Orgchem\Desktop"

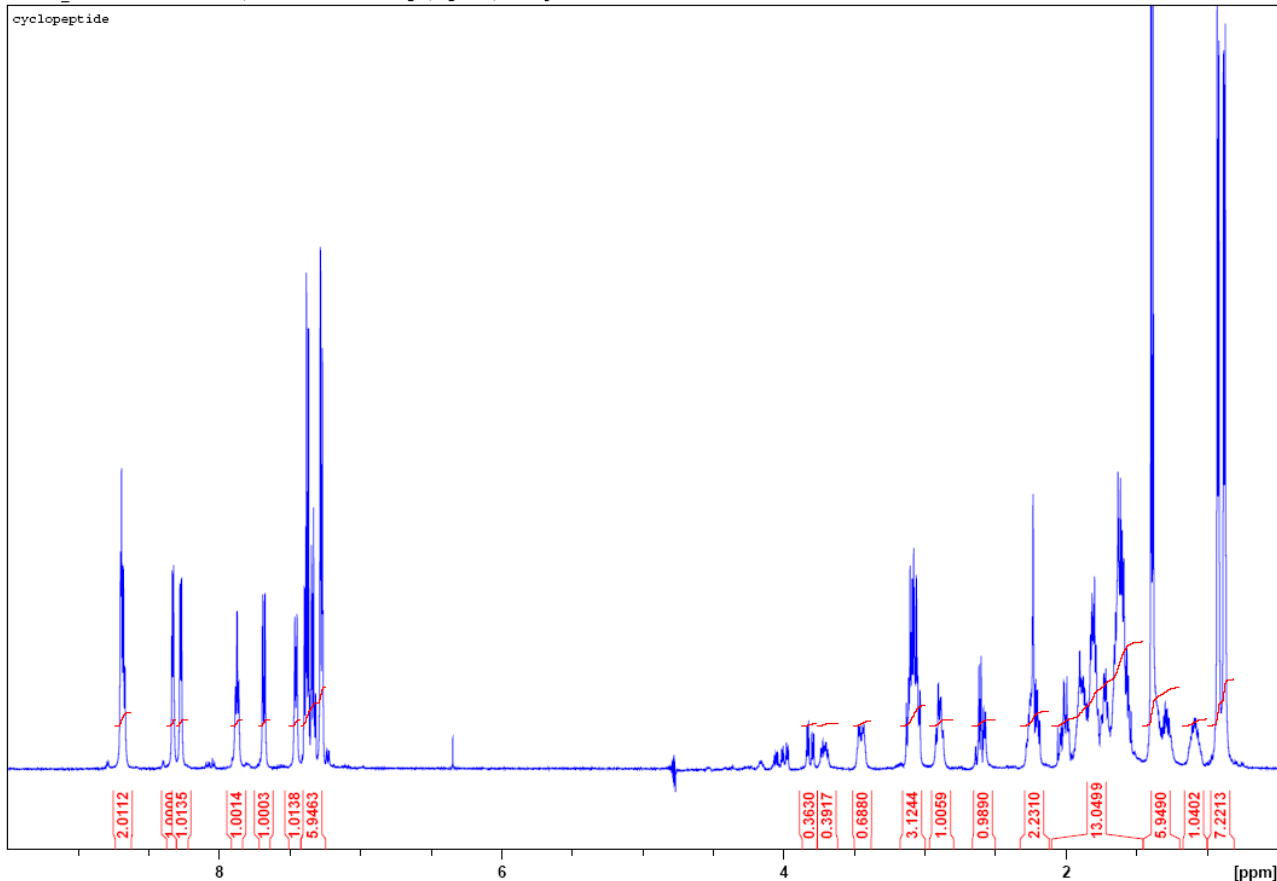

| <sup>1</sup> H-NMR (500 MHz, H <sub>2</sub> O/D <sub>2</sub> O 9:1) |                    |                                |                                 |
|---------------------------------------------------------------------|--------------------|--------------------------------|---------------------------------|
| residue                                                             | proton             | δ (ppm)                        | J (Hz)                          |
| leu <sup>1</sup>                                                    | NH                 | 8.34                           | <sup>3</sup> J(NH-αCH) = 5.43   |
|                                                                     | αCH                | 4.17                           |                                 |
|                                                                     | βCH <sub>2</sub>   | 1.61                           |                                 |
|                                                                     | γCH                | 1.61                           |                                 |
|                                                                     | δ'CH <sub>3</sub>  | 0.93                           |                                 |
|                                                                     | δ''CH <sub>3</sub> | 0.88                           |                                 |
| Gly <sup>2</sup>                                                    | NH                 | 8.69                           | <sup>3</sup> J(NH-α'CH) = 5.04  |
|                                                                     | α'CH               | 3.99                           | <sup>3</sup> J(NH-α''CH) = 7.22 |
| lys <sup>3</sup>                                                    | α''CH              | 3.81                           |                                 |
|                                                                     | αNH                | 7.48                           | <sup>3</sup> J(NH-αCH) = 7.61   |
|                                                                     | αCH                | 4.42                           |                                 |
|                                                                     | β'CH               | 1.86                           |                                 |
|                                                                     | β''CH              | 1.64                           |                                 |
|                                                                     | γ'CH               | 1.29                           |                                 |
|                                                                     | γ''CH              | 1.09                           |                                 |
|                                                                     | δ'CH               | 1.62                           |                                 |
|                                                                     | δ''CH              | 1.38                           |                                 |
|                                                                     | ε'CH               | 3.44                           |                                 |
| ε''CH                                                               | 3.08               | <sup>3</sup> J(NH-ε'CH) = 5.04 |                                 |
| phe <sup>4</sup>                                                    | εNH                | 7.89                           | <sup>3</sup> J(NH-ε''CH) = 7.52 |
|                                                                     | NH                 | 8.71                           | <sup>3</sup> J(NH-αCH) = 3.14   |
|                                                                     | αCH                | 4.53                           |                                 |
|                                                                     | βCH <sub>2</sub>   | 3.09                           |                                 |
|                                                                     | 2,6H               | 7.28                           |                                 |
|                                                                     | 3,5H               | 7.38                           |                                 |
| 4H                                                                  | 7.34               |                                |                                 |

|                  |                  |      |                               |
|------------------|------------------|------|-------------------------------|
| Pro <sup>5</sup> | αCH              | 4.37 |                               |
|                  | β'CH             | 1.80 |                               |
|                  | β''CH            | 1.72 |                               |
|                  | γ'CH             | 1.90 |                               |
|                  | γ''CH            | 1.81 |                               |
|                  | δ'CH             | 3.71 |                               |
| Glu <sup>6</sup> | δ''CH            | 2.90 |                               |
|                  | NH               | 7.70 | <sup>3</sup> J(NH-αCH) = 8.03 |
|                  | αCH              | 4.26 |                               |
|                  | β'CH             | 2.23 |                               |
|                  | β''CH            | 2.01 |                               |
| Ala <sup>7</sup> | γ'CH             | 2.59 |                               |
|                  | γ''CH            | 2.21 |                               |
|                  | NH               | 8.28 | <sup>3</sup> J(NH-αCH) = 5.17 |
|                  | αCH              | 4.06 |                               |
|                  | βCH <sub>3</sub> | 1.39 |                               |



$1^1Gk^2FPE^1a^2$  (3).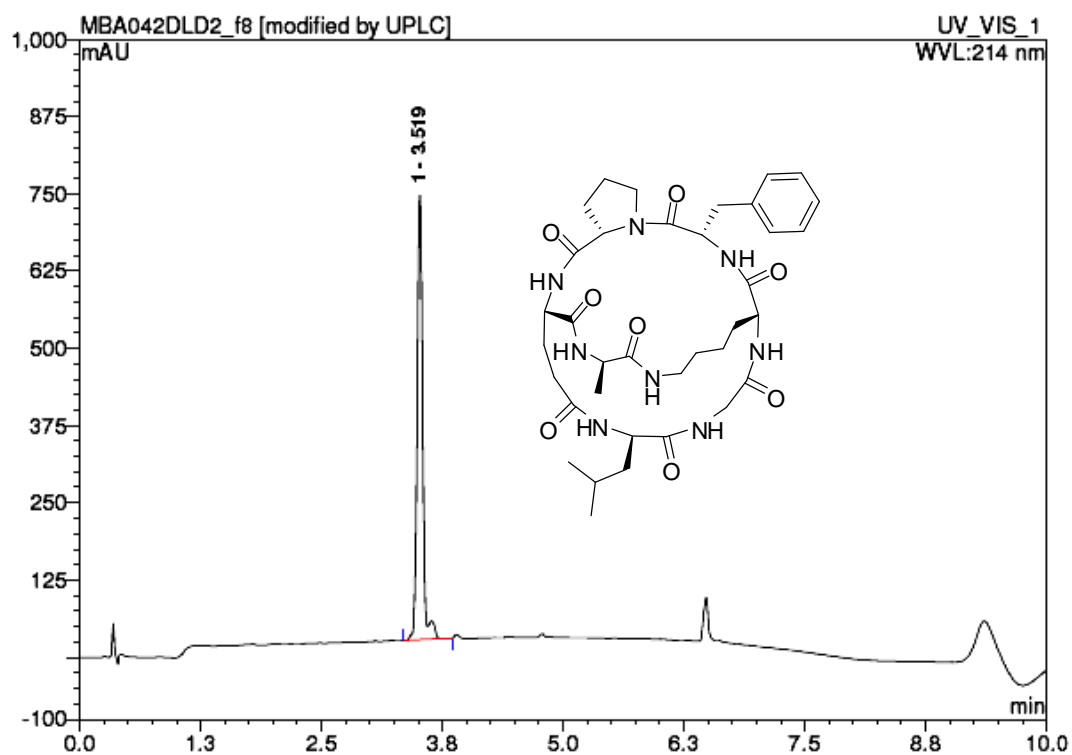

C:\Xcalibur\1\Bartoloni MBA 042 DLD2  
NSI pos ACN + 0.1%HFo  
University of Bern, Department of Chemistry and Biochemistry  
Mass Spectrometry Service, Schuerch Group  
Bartoloni MBA 042 DLD2 #1-28 RT: 0.6-1.0 AV: 14 NL: 1.81E8  
T: FTMS + p NSI Full ms [115.00-2000.00]

3/5/2012 8:43:58 AM

MBA 042 DLD2

LTQ Orbitrap XL

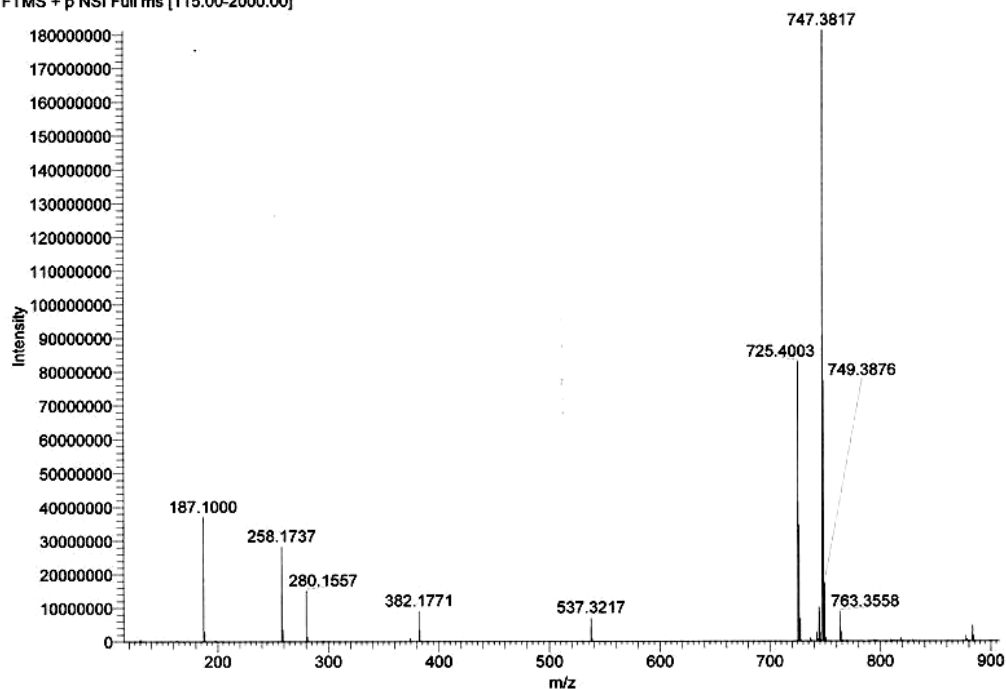

006719\_MBA042DLD2 1 1 "C:\Documents and Settings\Orgchem\Desktop"

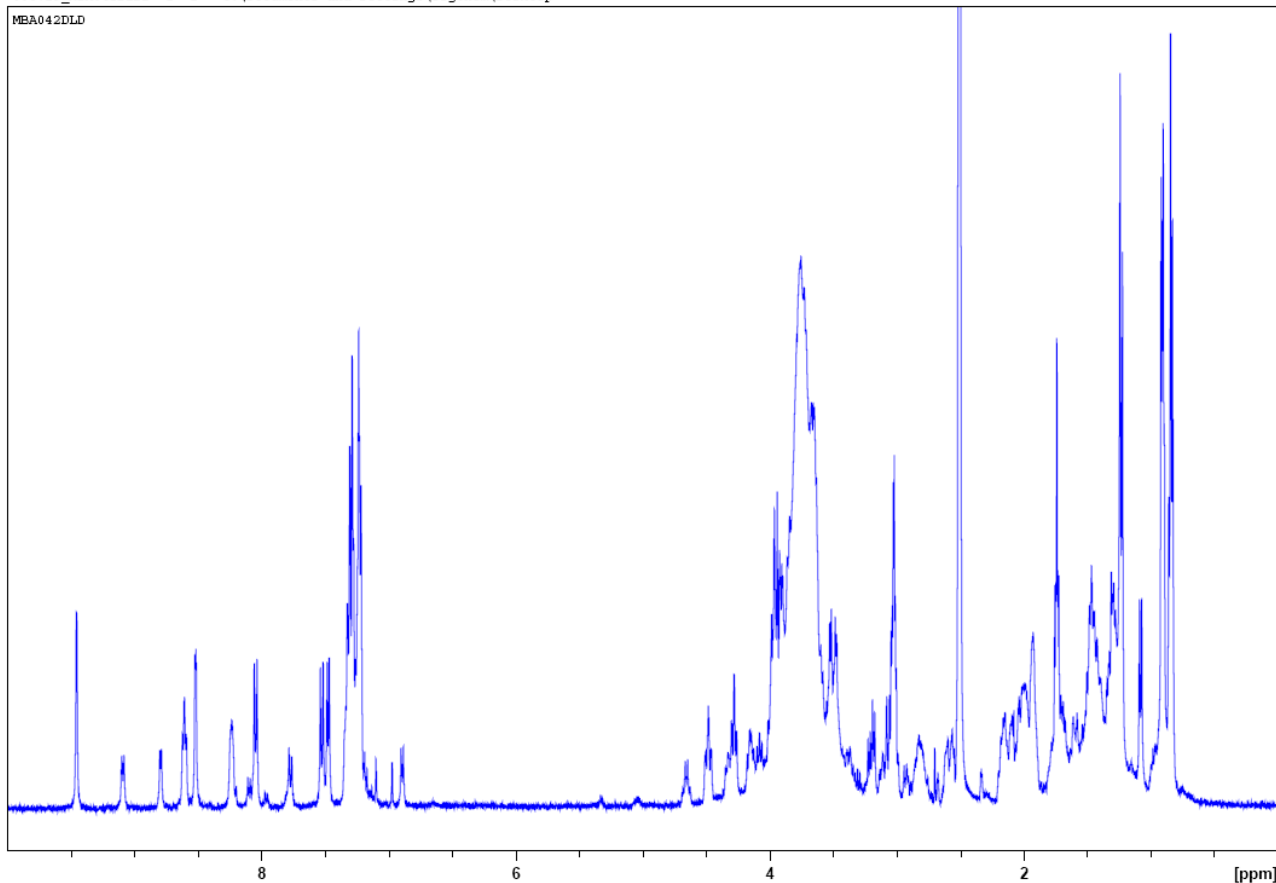

| <b><sup>1</sup>H-NMR (400 MHz, DMSO-<i>d</i><sub>6</sub>)</b> |               |                                     |                                     |                                                      |
|---------------------------------------------------------------|---------------|-------------------------------------|-------------------------------------|------------------------------------------------------|
| <i>residue</i>                                                | <i>proton</i> | $\delta$ (ppm)<br><i>conform. A</i> | $\delta$ (ppm)<br><i>conform. B</i> | <i>J</i> (Hz)                                        |
| leu <sup>1</sup>                                              | NH            | 8.52                                | 8.25                                | <sup>3</sup> <i>J</i> (NH- $\alpha$ CH) = 3.00 (A)   |
| Gly <sup>2</sup>                                              | NH            | 8.61                                | 8.23                                | <sup>3</sup> <i>J</i> (NH- $\alpha$ CH) = 4.00 (B)   |
| lys <sup>3</sup>                                              | $\alpha$ NH   | 8.05                                | 6.90                                | <sup>3</sup> <i>J</i> (NH- $\alpha'$ CH) = 4.09 (A)  |
|                                                               |               |                                     |                                     | <sup>3</sup> <i>J</i> (NH- $\alpha''$ CH) = 8.09 (A) |
|                                                               |               |                                     |                                     | <sup>3</sup> <i>J</i> (NH- $\alpha$ CH) = 8.18 (A)   |
| Phe <sup>4</sup>                                              | NH            | 9.46                                | 9.09                                | <sup>3</sup> <i>J</i> (NH- $\alpha$ CH) = 7.17 (B)   |
|                                                               |               |                                     |                                     | <sup>3</sup> <i>J</i> (NH- $\alpha$ CH) = 1.08 (A)   |
|                                                               |               |                                     |                                     | <sup>3</sup> <i>J</i> (NH- $\alpha$ CH) = 6.77 (B)   |
| Glu <sup>6</sup>                                              | NH            | 7.53                                | 8.80                                | <sup>3</sup> <i>J</i> (NH- $\alpha$ CH) = 8.67 (A)   |
|                                                               |               |                                     |                                     | <sup>3</sup> <i>J</i> (NH- $\alpha$ CH) = 4.88 (B)   |
| ala <sup>7</sup>                                              | NH            | 7.48                                | 7.78                                | <sup>3</sup> <i>J</i> (NH- $\alpha$ CH) = 6.47 (A)   |
|                                                               |               |                                     |                                     | <sup>3</sup> <i>J</i> (NH- $\alpha$ CH) = 8.51 (B)   |

$L^1Gk^2fPE^1a^2$  (4).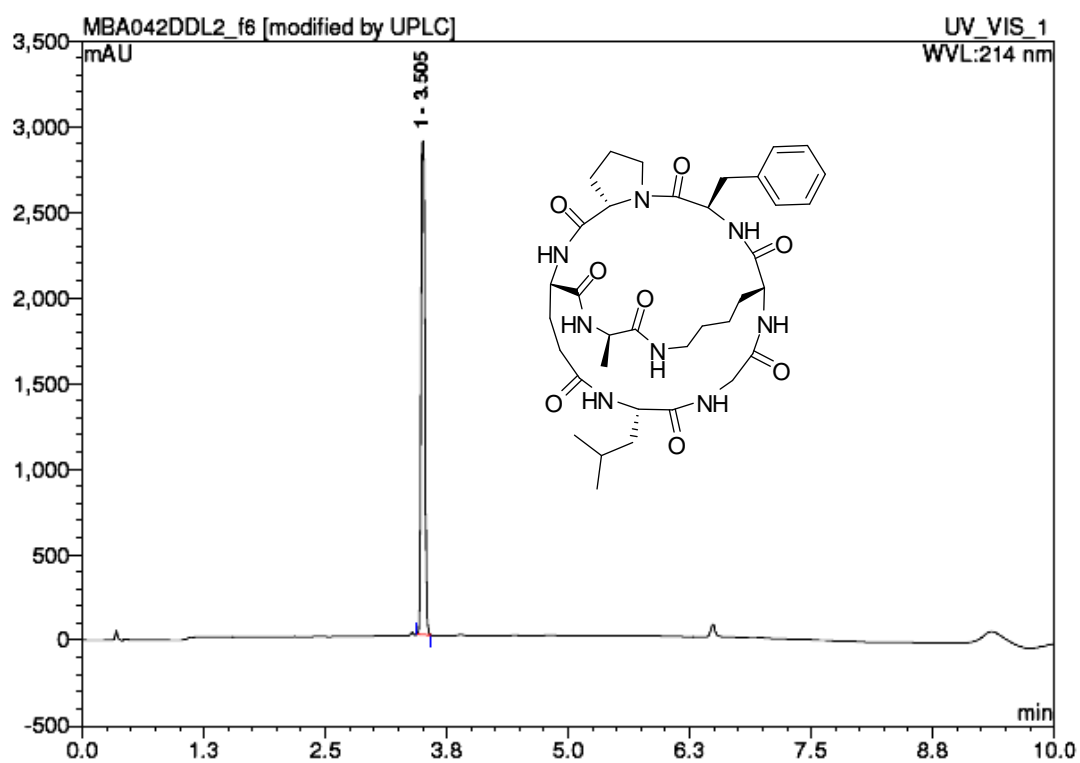

6011 MBA 042 DLD2 prep2 f7  
sol ACN + 0.1% HFO  
University of Bern, Department of Chemistry and Biochemistry  
Spectrometry Service - Schuerch Group  
6011 MBA 042 DLD2 prep2 f7 #1-7 RT: 0.0-0.2 AV: 7 NL: 2.59E8  
IMS + p NSI Full ms [150.00-2000.00]

10/5/2011 9:13:27 AM

LTQ Orbitrap XL

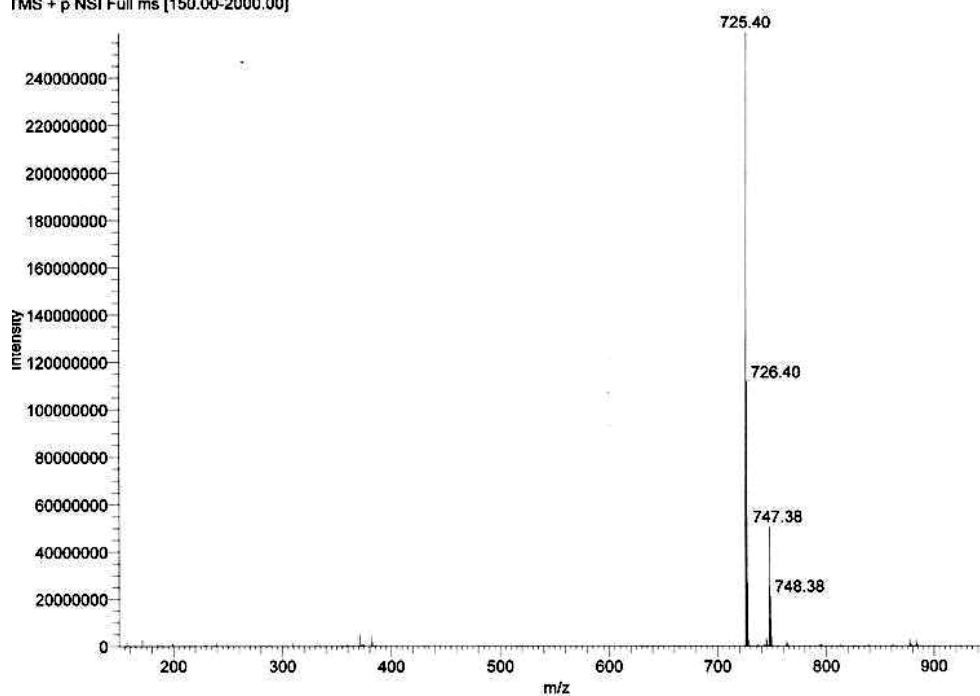

006720\_cyclopeptide 1 1 "C:\Documents and Settings\Orgchem\Desktop"

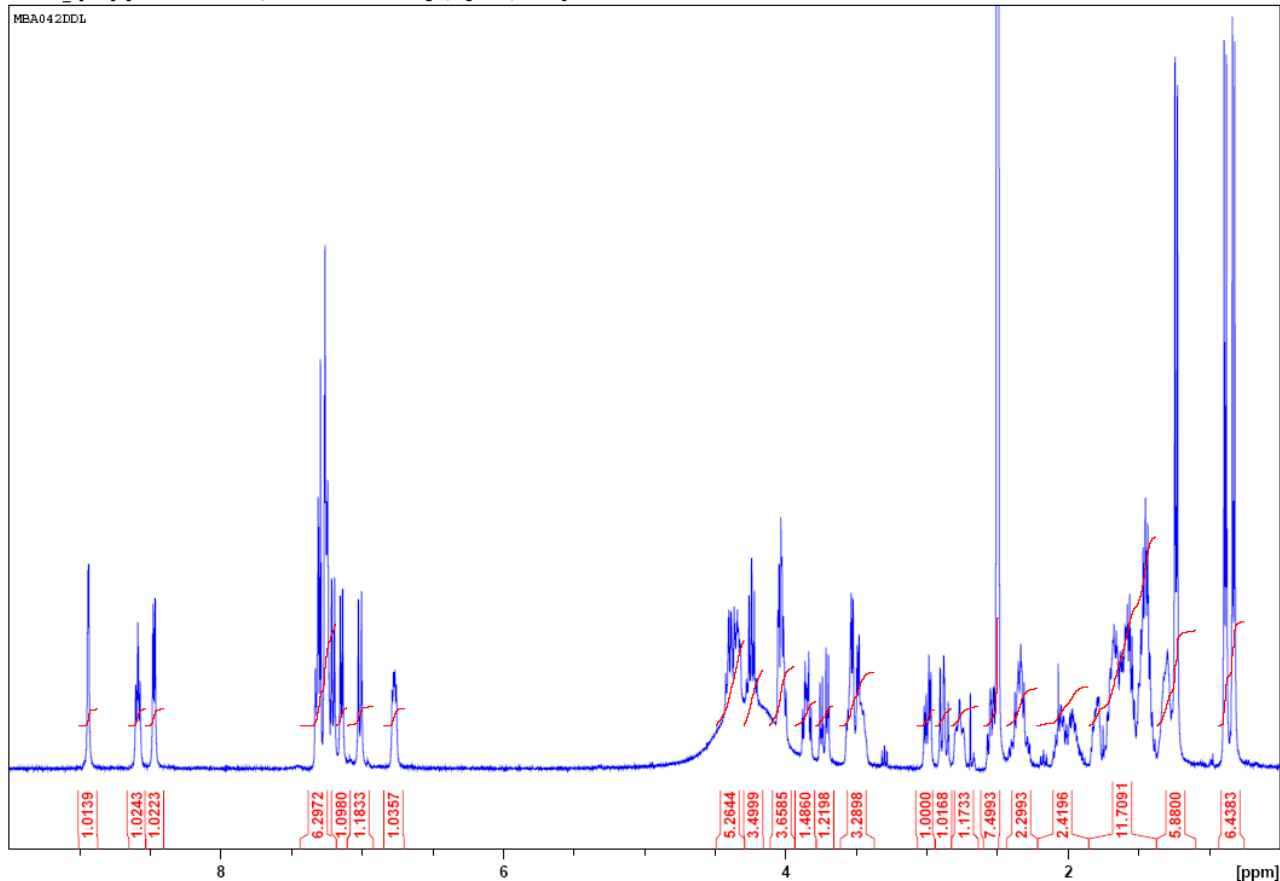

| <sup>1</sup> H-NMR (400 MHz, DMSO- <i>d</i> <sub>6</sub> ) |                    |         |                                 |
|------------------------------------------------------------|--------------------|---------|---------------------------------|
| residue                                                    | proton             | δ (ppm) | J (Hz)                          |
| Leu <sup>1</sup>                                           | NH                 | 8.47    | <sup>3</sup> J(NH-αCH) = 5.79   |
|                                                            | αCH                | 4.02    |                                 |
|                                                            | βCH <sub>2</sub>   | 1.45    |                                 |
|                                                            | γCH                | 1.55    |                                 |
|                                                            | δ'CH <sub>3</sub>  | 0.88    |                                 |
|                                                            | δ''CH <sub>3</sub> | 0.83    |                                 |
| Gly <sup>2</sup>                                           | NH                 | 8.59    | <sup>3</sup> J(NH-α'CH) = 5.10  |
|                                                            | α'CH               | 3.73    | <sup>3</sup> J(NH-α''CH) = 7.20 |
| lys <sup>3</sup>                                           | α''CH              | 3.51    |                                 |
|                                                            | αNH                | 7.01    | <sup>3</sup> J(NH-αCH) = 9.04   |
|                                                            | αCH                | 4.40    |                                 |
|                                                            | β'CH               | 1.65    |                                 |
|                                                            | β''CH              | 1.31    |                                 |
|                                                            | γCH <sub>2</sub>   | 1.47    |                                 |
|                                                            | δ'CH               | 1.60    |                                 |
|                                                            | δ''CH              | 1.30    |                                 |
|                                                            | ε'CH               | 3.47    |                                 |
|                                                            | ε''CH              | 2.78    | <sup>3</sup> J(NH-ε'CH) = 3.82  |
| phe <sup>4</sup>                                           | εNH                | 6.77    | <sup>3</sup> J(NH-ε''CH) = 7.42 |
|                                                            | NH                 | 8.94    | <sup>3</sup> J(NH-αCH) = 2.15   |
|                                                            | αCH                | 4.34    |                                 |
|                                                            | β'CH               | 2.99    |                                 |
|                                                            | β''CH              | 2.88    |                                 |
|                                                            | 2,6H               | 7.25    |                                 |
|                                                            | 3,4,5H             | 7.30    |                                 |

|                  |                  |      |                               |
|------------------|------------------|------|-------------------------------|
| Pro <sup>5</sup> | αCH              | 4.04 |                               |
|                  | β'CH             | 1.79 |                               |
|                  | β''CH            | 1.68 |                               |
|                  | γCH <sub>2</sub> | 1.67 |                               |
|                  | δ'CH             | 3.55 |                               |
| Glu <sup>6</sup> | δ''CH            | 2.55 |                               |
|                  | NH               | 7.14 | <sup>3</sup> J(NH-αCH) = 6.95 |
|                  | αCH              | 3.85 |                               |
|                  | β'CH             | 2.05 |                               |
| ala <sup>7</sup> | β''CH            | 1.97 |                               |
|                  | γCH <sub>2</sub> | 2.35 |                               |
|                  | NH               | 7.21 | <sup>3</sup> J(NH-αCH) = 8.23 |
|                  | αCH              | 4.24 |                               |
|                  | βCH <sub>3</sub> | 1.24 |                               |

$1^1Gk^2FPE^1A^2$  (5).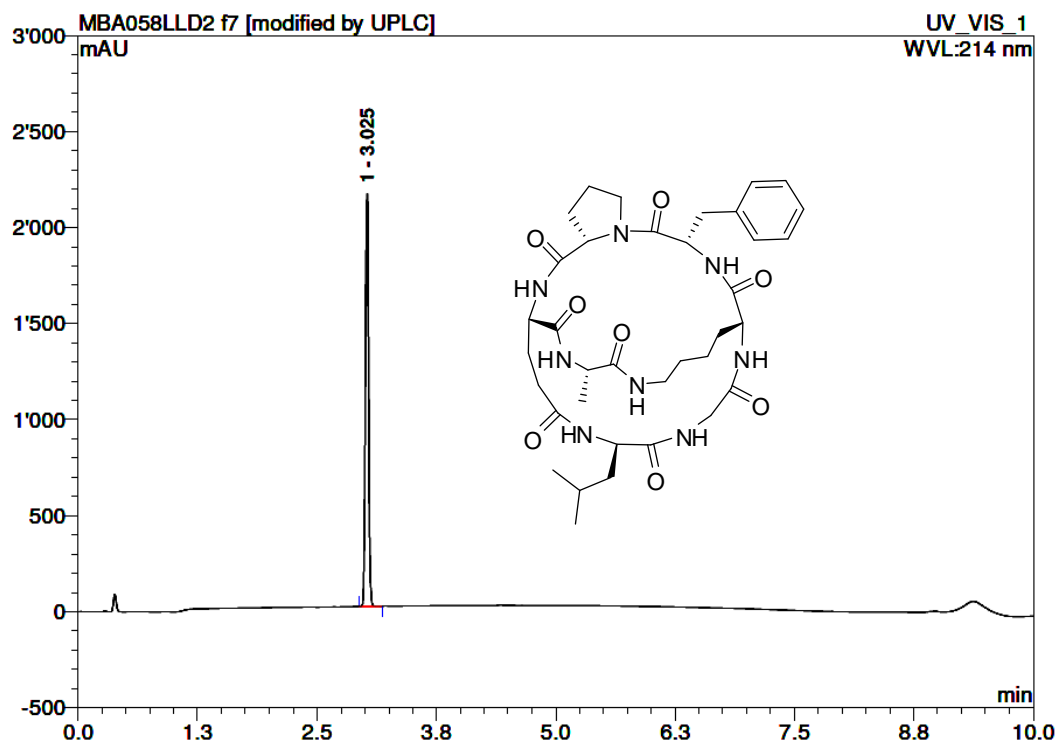

Bartoloni MBA 058 LLD2\_120423184710

4/26/2012 2:51:47 PM

MBA 058 LLD2

NSI pos ACN + 1%HFo

Bartoloni MBA 058 LLD2\_120423184710 #1-5 RT: 0.0-0.1 AV: 5 NL: 1.30E8

T: FTMS + p NSI Full ms [150.00-2000.00]

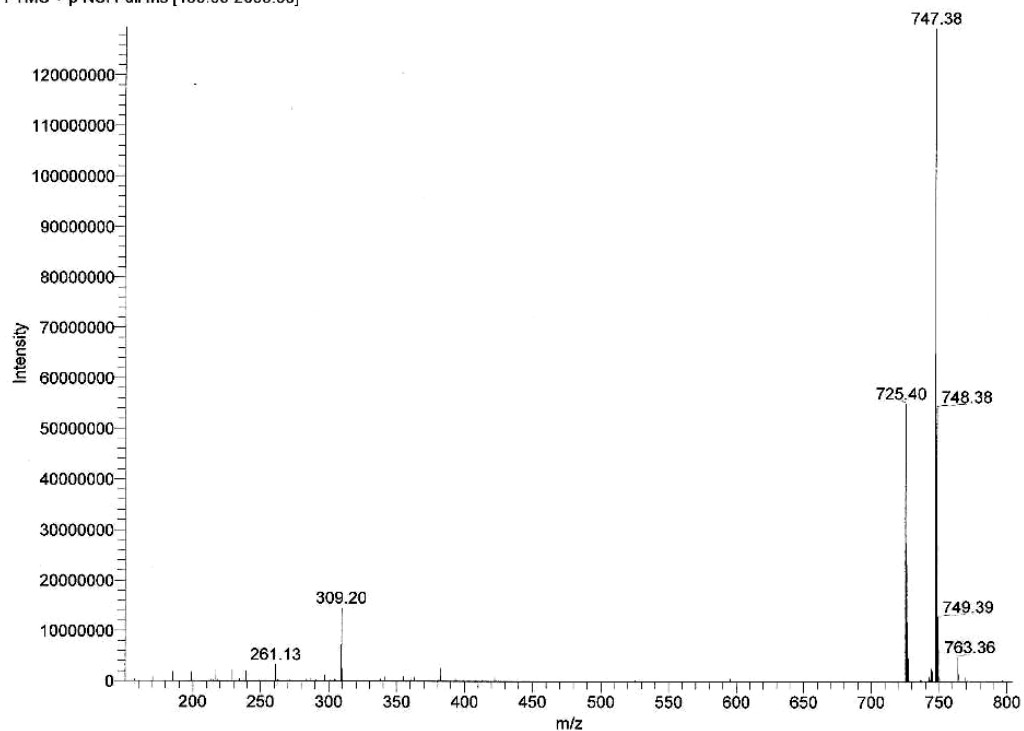

006836\_cyclopeptideLLD 4 1 \\130.92.134.128\marco\NMR

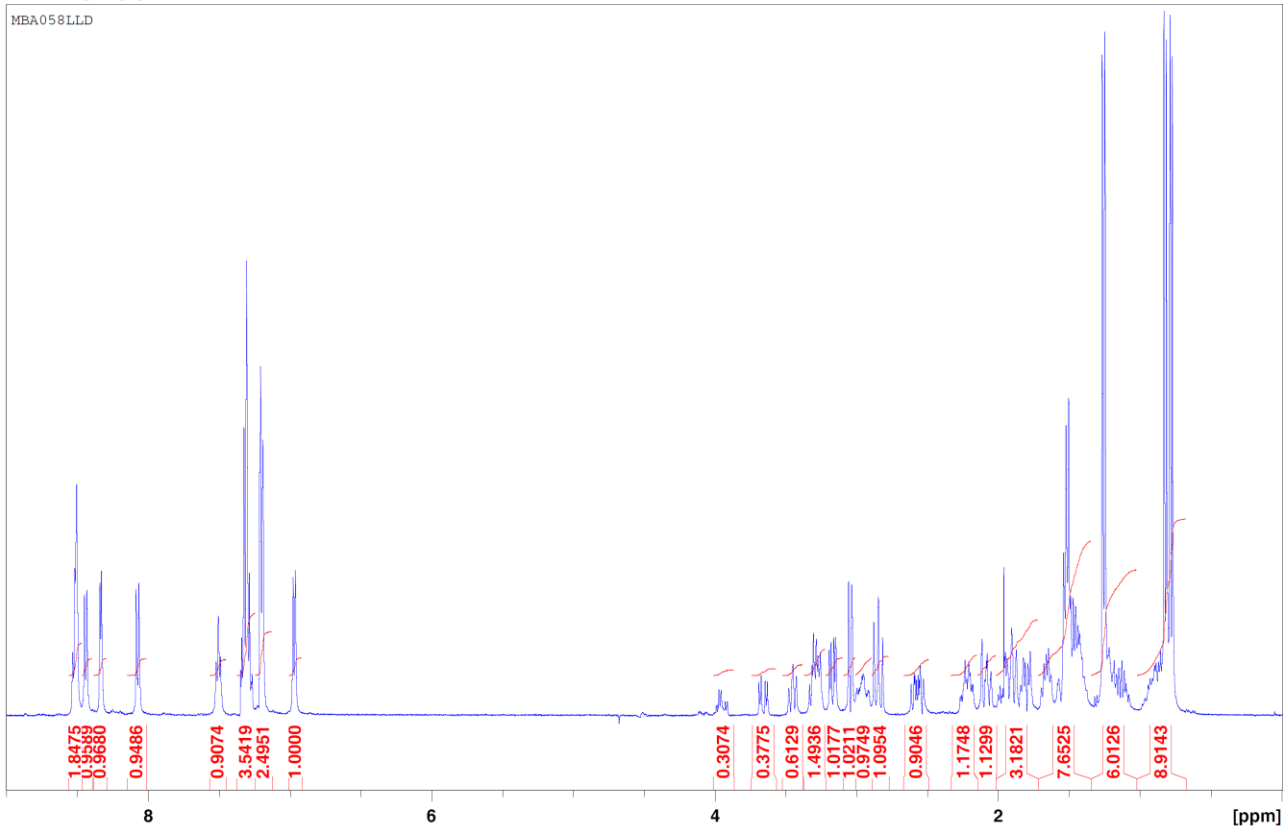**<sup>1</sup>H-NMR (500 MHz, H<sub>2</sub>O/D<sub>2</sub>O 9:1)**

| residue          | proton                | $\delta$ (ppm) | $J$ (Hz)                                  |
|------------------|-----------------------|----------------|-------------------------------------------|
| leu <sup>1</sup> | NH                    | 8.06           | $^3J(\text{NH}-\alpha\text{CH}) = 7.49$   |
|                  | $\alpha\text{CH}$     | 4.36           |                                           |
|                  | $\beta\text{CH}_2$    | 1.51           |                                           |
|                  | $\gamma\text{CH}$     | 1.47           |                                           |
|                  | $\delta'\text{CH}_3$  | 0.82           |                                           |
|                  | $\delta''\text{CH}_3$ | 0.78           |                                           |
|                  | Gly <sup>2</sup>      | NH             | 8.52                                      |
|                  | $\alpha'\text{CH}$    | 3.94           |                                           |
|                  | $\alpha''\text{CH}$   | 3.77           |                                           |
| lys <sup>3</sup> | $\alpha\text{NH}$     | 6.97           | $^3J(\text{NH}-\alpha\text{CH}) = 6.53$   |
|                  | $\alpha\text{CH}$     | 4.53           |                                           |
|                  | $\beta'\text{CH}$     | 1.95           |                                           |
|                  | $\beta''\text{CH}$    | 1.53           |                                           |
|                  | $\gamma\text{CH}_2$   | 0.87           |                                           |
|                  | $\delta'\text{CH}$    | 1.45           |                                           |
|                  | $\delta''\text{CH}$   | 1.23           |                                           |
|                  | $\epsilon'\text{CH}$  | 3.27           |                                           |
|                  | $\epsilon''\text{CH}$ | 2.95           |                                           |
| Phe <sup>4</sup> | $\epsilon\text{NH}$   | 7.50           | $^3J(\text{NH}-\epsilon\text{CH}) = 6.29$ |
|                  | NH                    | 8.50           |                                           |
|                  | $\alpha\text{CH}$     | 4.50           |                                           |
|                  | $\beta'\text{CH}$     | 3.16           |                                           |
|                  | $\beta''\text{CH}$    | 2.85           |                                           |
|                  | 2,6H                  | 7.20           |                                           |
|                  | 3,4,5H                | 7.31           |                                           |

|                  |                     |      |                                         |
|------------------|---------------------|------|-----------------------------------------|
| Pro <sup>5</sup> | $\alpha\text{CH}$   | 3.05 |                                         |
|                  | $\beta'\text{CH}$   | 1.79 |                                         |
|                  | $\beta''\text{CH}$  | 1.11 |                                         |
|                  | $\gamma'\text{CH}$  | 1.66 |                                         |
|                  | $\gamma''\text{CH}$ | 1.45 |                                         |
| Glu <sup>6</sup> | $\delta'\text{CH}$  | 3.44 |                                         |
|                  | $\delta''\text{CH}$ | 3.29 |                                         |
|                  | NH                  | 8.44 | $^3J(\text{NH}-\alpha\text{CH}) = 7.17$ |
|                  | $\alpha\text{CH}$   | 4.09 |                                         |
|                  | $\beta'\text{CH}$   | 2.21 |                                         |
|                  | $\beta''\text{CH}$  | 1.88 |                                         |
| Ala <sup>7</sup> | $\gamma'\text{CH}$  | 2.57 |                                         |
|                  | $\gamma''\text{CH}$ | 2.08 |                                         |
|                  | NH                  | 8.33 | $^3J(\text{NH}-\alpha\text{CH}) = 4.45$ |
|                  | $\alpha\text{CH}$   | 3.98 |                                         |
|                  | $\beta\text{CH}_3$  | 1.25 |                                         |

L<sup>1</sup>Gk<sup>2</sup>fPE<sup>1</sup>A<sup>2</sup> (6).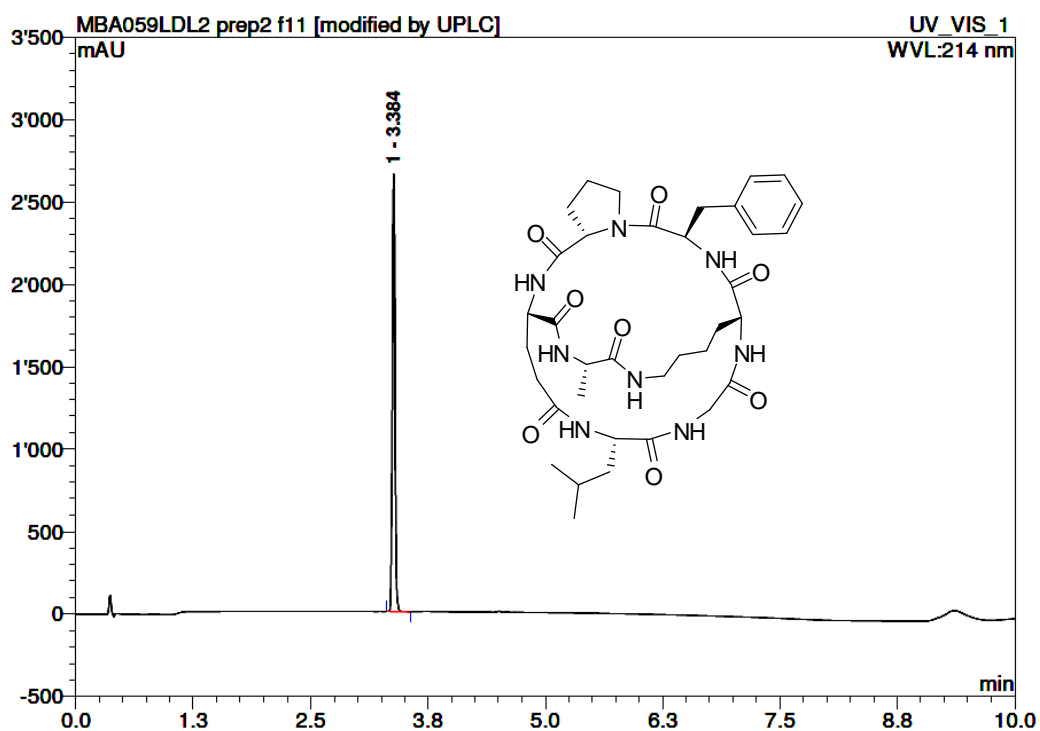

Bartoloni MBA 059 LDL2 12\_14\_12052215...

5/24/2012 2:04:50 PM

MBA 059 LDL2 12\_14

NSI pos ACN + 1%HFo

Bartoloni MBA 059 LDL2 12\_14\_120522150354 #1-5 RT: 0.0-0.1 AV: 5 NL: 2.17E8

T: FTMS + p NSI Full ms [150.00-2000.00]

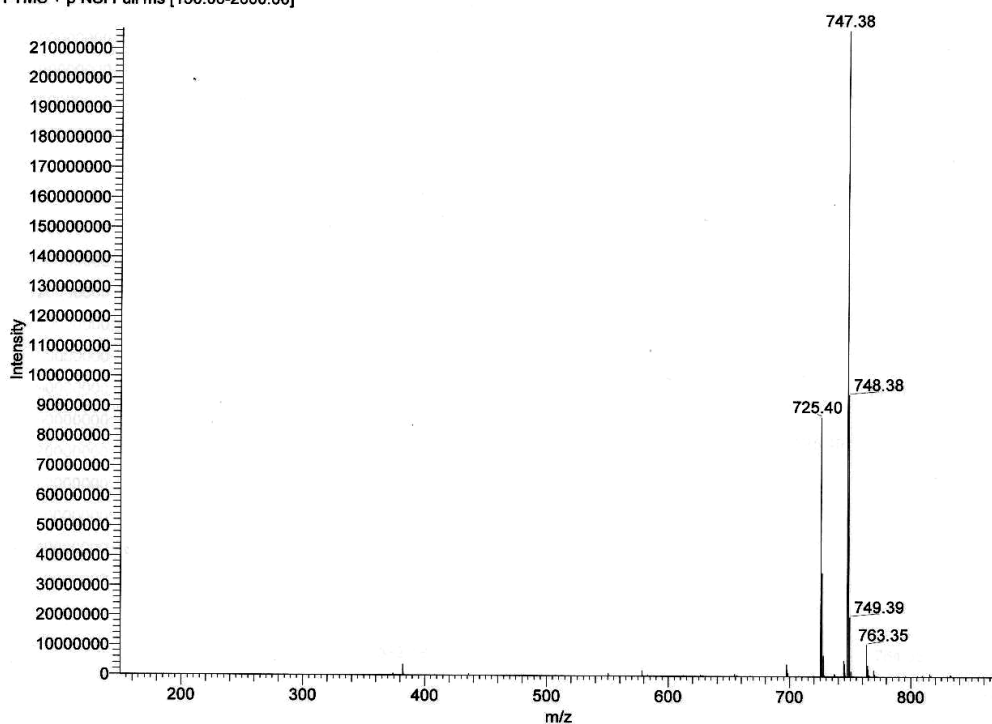

MBA059LDL 2 1 \\130.92.134.128\marco\NMR

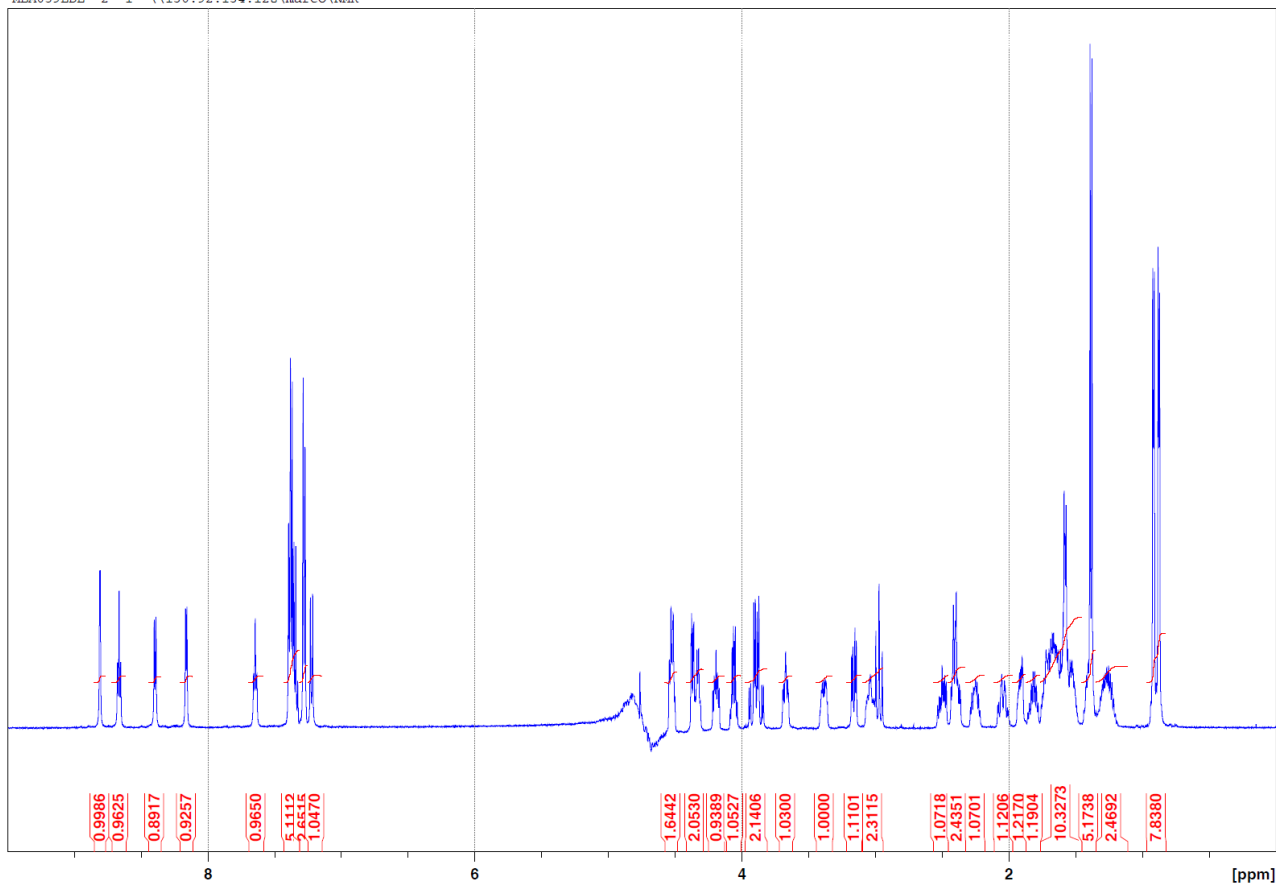**<sup>1</sup>H-NMR (500 MHz, H<sub>2</sub>O/D<sub>2</sub>O 9:1)**

| residue             | proton                | $\delta$ (ppm) | $J$ (Hz)                                    |
|---------------------|-----------------------|----------------|---------------------------------------------|
| Leu <sup>1</sup>    | NH                    | 8.39           | $^3J(\text{NH}-\alpha\text{CH}) = 6.26$     |
|                     | $\alpha\text{CH}$     | 4.23           |                                             |
|                     | $\beta\text{CH}_2$    | 1.47           |                                             |
|                     | $\gamma\text{CH}$     | 1.48           |                                             |
|                     | $\delta'\text{CH}_3$  | 0.81           |                                             |
|                     | $\delta''\text{CH}_3$ | 0.78           |                                             |
|                     | Gly <sup>2</sup>      | NH             | 8.67                                        |
| $\alpha\text{CH}_2$ |                       | 3.78           | $^3J(\text{NH}-\alpha''\text{CH}) = 7.09$   |
| lys <sup>3</sup>    | $\alpha\text{NH}$     | 7.22           | $^3J(\text{NH}-\alpha\text{CH}) = 8.45$     |
|                     | $\alpha\text{CH}$     | 4.42           |                                             |
|                     | $\beta'\text{CH}$     | 1.55           |                                             |
|                     | $\beta''\text{CH}$    | 1.31           |                                             |
|                     | $\gamma\text{CH}_2$   | 1.16           |                                             |
|                     | $\delta'\text{CH}$    | 1.70           |                                             |
|                     | $\delta''\text{CH}$   | 1.62           |                                             |
|                     | $\epsilon'\text{CH}$  | 3.28           |                                             |
|                     | $\epsilon''\text{CH}$ | 2.95           | $^3J(\text{NH}-\epsilon'\text{CH}) = 4.24$  |
|                     | $\epsilon\text{NH}$   | 7.65           | $^3J(\text{NH}-\epsilon''\text{CH}) = 7.65$ |
| phe <sup>4</sup>    | NH                    | 8.81           | $^3J(\text{NH}-\alpha\text{CH}) = 1.70$     |
|                     | $\alpha\text{CH}$     | 4.44           |                                             |
|                     | $\beta'\text{CH}$     | 3.07           |                                             |
|                     | $\beta''\text{CH}$    | 2.88           |                                             |
|                     | 2,6H                  | 7.19           |                                             |
|                     | 3,5H                  | 7.28           |                                             |
|                     | 4H                    | 7.26           |                                             |

|                  |                     |      |                                         |
|------------------|---------------------|------|-----------------------------------------|
| Pro <sup>5</sup> | $\alpha\text{CH}$   | 4.27 |                                         |
|                  | $\beta'\text{CH}$   | 1.80 |                                         |
|                  | $\beta''\text{CH}$  | 1.58 |                                         |
|                  | $\gamma'\text{CH}$  | 1.54 |                                         |
|                  | $\gamma''\text{CH}$ | 1.44 |                                         |
|                  | $\delta'\text{CH}$  | 3.57 |                                         |
| Glu <sup>6</sup> | $\delta''\text{CH}$ | 2.32 |                                         |
|                  | NH                  | 7.38 | $^3J(\text{NH}-\alpha\text{CH}) = 7.56$ |
|                  | $\alpha\text{CH}$   | 4.09 |                                         |
|                  | $\beta'\text{CH}$   | 2.15 |                                         |
| Ala <sup>7</sup> | $\beta''\text{CH}$  | 1.94 |                                         |
|                  | $\gamma'\text{CH}$  | 2.39 |                                         |
|                  | $\gamma''\text{CH}$ | 2.29 |                                         |
|                  | NH                  | 8.16 | $^3J(\text{NH}-\alpha\text{CH}) = 5.01$ |
|                  | $\alpha\text{CH}$   | 3.97 |                                         |
|                  | $\beta\text{CH}_3$  | 1.29 |                                         |



$L^1Gk^2FPE^1a^2$  (7).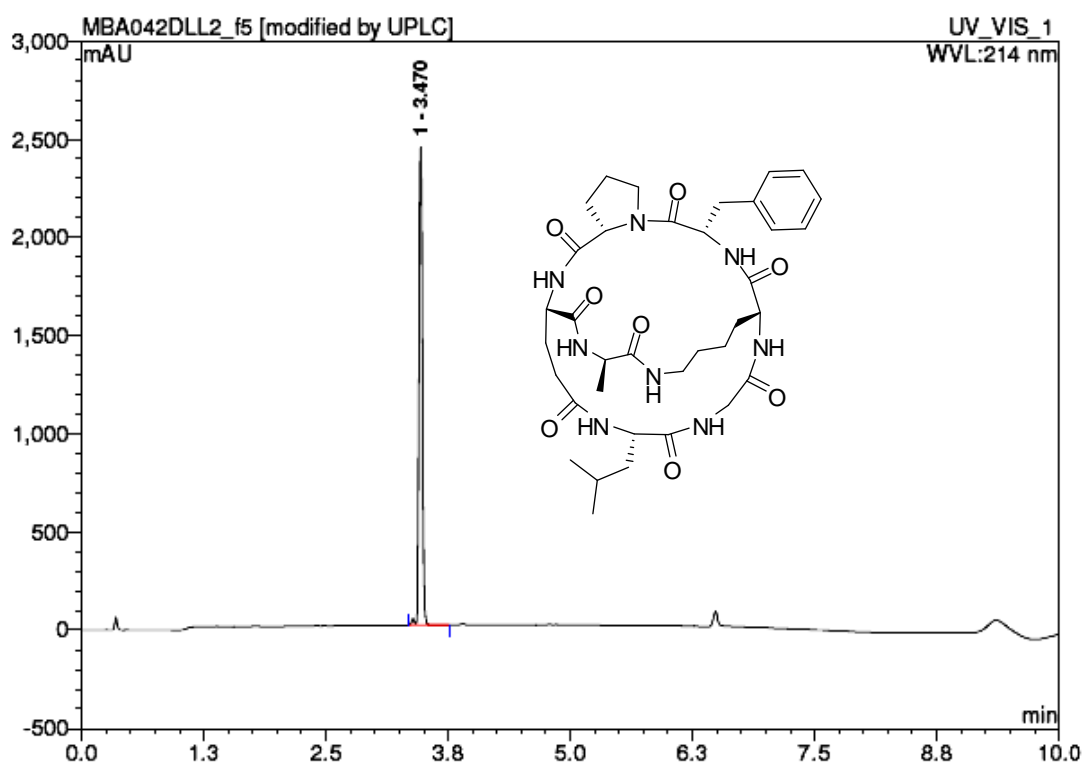

Bartoloni MBA 042 DLL2 prep2 f4 10/5/2011 9:05:30 AM  
NSI pos ACN + 0.1%HFo  
University of Bern, Department of Chemistry and Biochemistry  
Mass Spectrometry Service - Schuerch Group  
Bartoloni MBA 042 DLL2 prep2 f4 #2-4 RT: 0.0-0.1 AV: 3 NL: 7.77E7  
T: FTMS + p NSI Full ms [150.00-2000.00]

LTQ Orbitrap XL

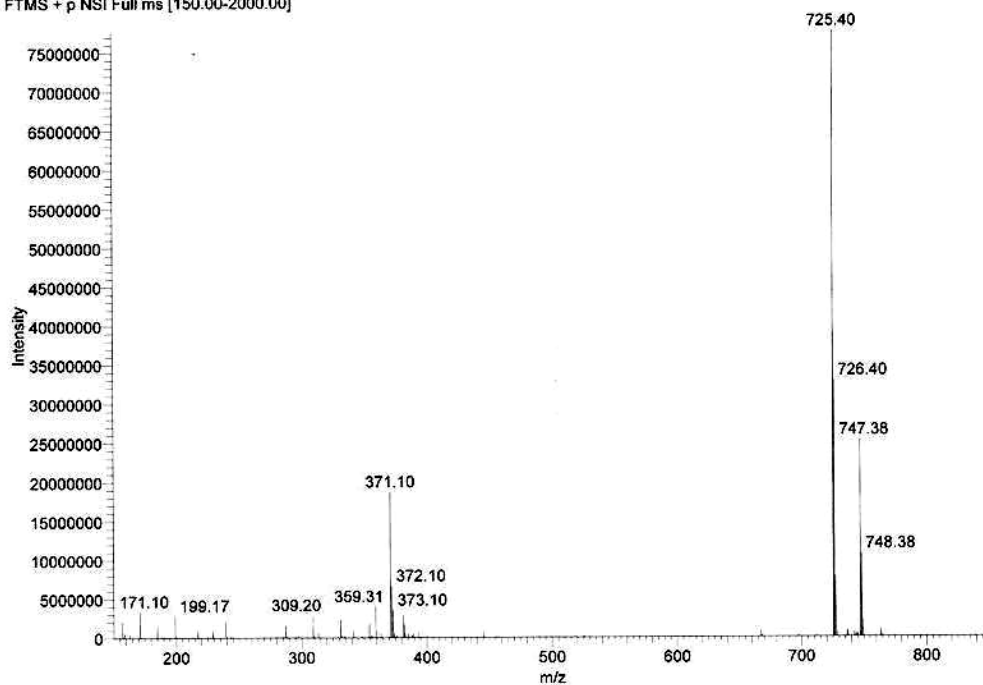

006718\_MBA042DLL2 2 1 "C:\Documents and Settings\Orgchem\Desktop"

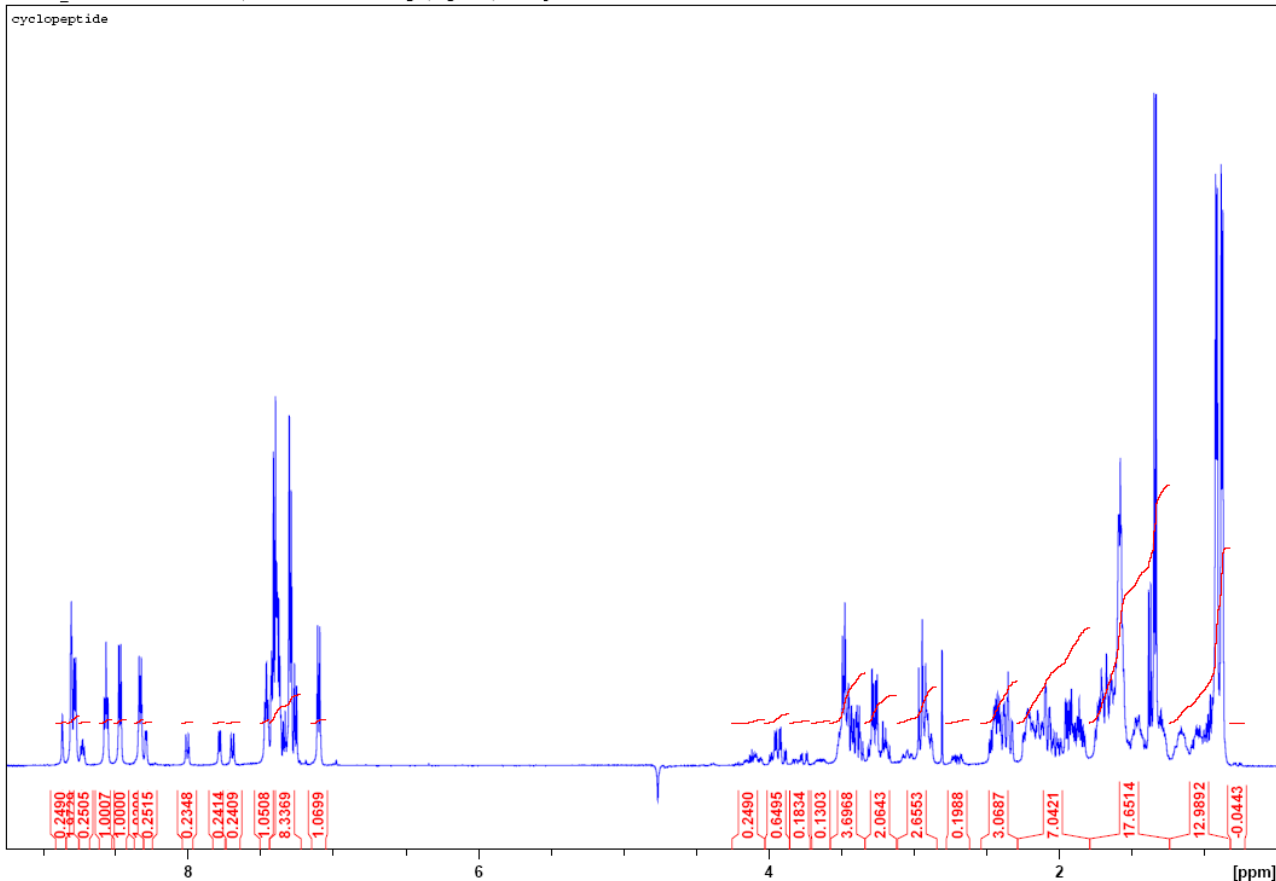

| <b><sup>1</sup>H-NMR (500 MHz, H<sub>2</sub>O/D<sub>2</sub>O 9:1)</b> |               |                                     |                                     |                                                                                                                                                                                                                            |
|-----------------------------------------------------------------------|---------------|-------------------------------------|-------------------------------------|----------------------------------------------------------------------------------------------------------------------------------------------------------------------------------------------------------------------------|
| <i>residue</i>                                                        | <i>proton</i> | $\delta$ (ppm)<br><i>conform. A</i> | $\delta$ (ppm)<br><i>conform. B</i> | <i>J</i> (Hz)                                                                                                                                                                                                              |
| Leu <sup>1</sup>                                                      | NH            | 8.38                                | 8.20                                | <sup>3</sup> <i>J</i> (NH- $\alpha$ CH) = 7.04 (A)<br><sup>3</sup> <i>J</i> (NH- $\alpha$ CH) = 4.04 (B)                                                                                                                   |
| Gly <sup>2</sup>                                                      | NH            | 8.48                                | 8.64                                | <sup>3</sup> <i>J</i> (NH- $\alpha'$ CH) = 5.38 (A)<br><sup>3</sup> <i>J</i> (NH- $\alpha''$ CH) = 6.58 (A)<br><sup>3</sup> <i>J</i> (NH- $\alpha'$ CH) = 5.54 (B)<br><sup>3</sup> <i>J</i> (NH- $\alpha''$ CH) = 7.04 (B) |
| lys <sup>3</sup>                                                      | $\alpha$ NH   | 7.01                                | 7.92                                | <sup>3</sup> <i>J</i> (NH- $\alpha$ CH) = 7.78 (A)<br><sup>3</sup> <i>J</i> (NH- $\alpha$ CH) = 8.83 (B)                                                                                                                   |
|                                                                       | $\epsilon$ NH | 7.37                                |                                     | <sup>3</sup> <i>J</i> (NH- $\epsilon'$ CH) = 4.79 (A)<br><sup>3</sup> <i>J</i> (NH- $\epsilon''$ CH) = 7.48 (A)                                                                                                            |
| Phe <sup>4</sup>                                                      | NH            | 8.72                                | 8.78                                | <sup>3</sup> <i>J</i> (NH- $\alpha$ CH) = 1.80 (A)                                                                                                                                                                         |
| Glu <sup>6</sup>                                                      | NH            | 8.69                                | 7.61                                | <sup>3</sup> <i>J</i> (NH- $\alpha$ CH) = 6.29 (A)<br><sup>3</sup> <i>J</i> (NH- $\alpha$ CH) = 9.28 (B)                                                                                                                   |
| ala <sup>7</sup>                                                      | NH            | 8.24                                | 7.60                                | <sup>3</sup> <i>J</i> (NH- $\alpha$ CH) = 7.48 (A)<br><sup>3</sup> <i>J</i> (NH- $\alpha$ CH) = 6.14 (B)                                                                                                                   |

L<sup>1</sup>Gk<sup>2</sup>FPE<sup>1</sup>A<sup>2</sup> (8).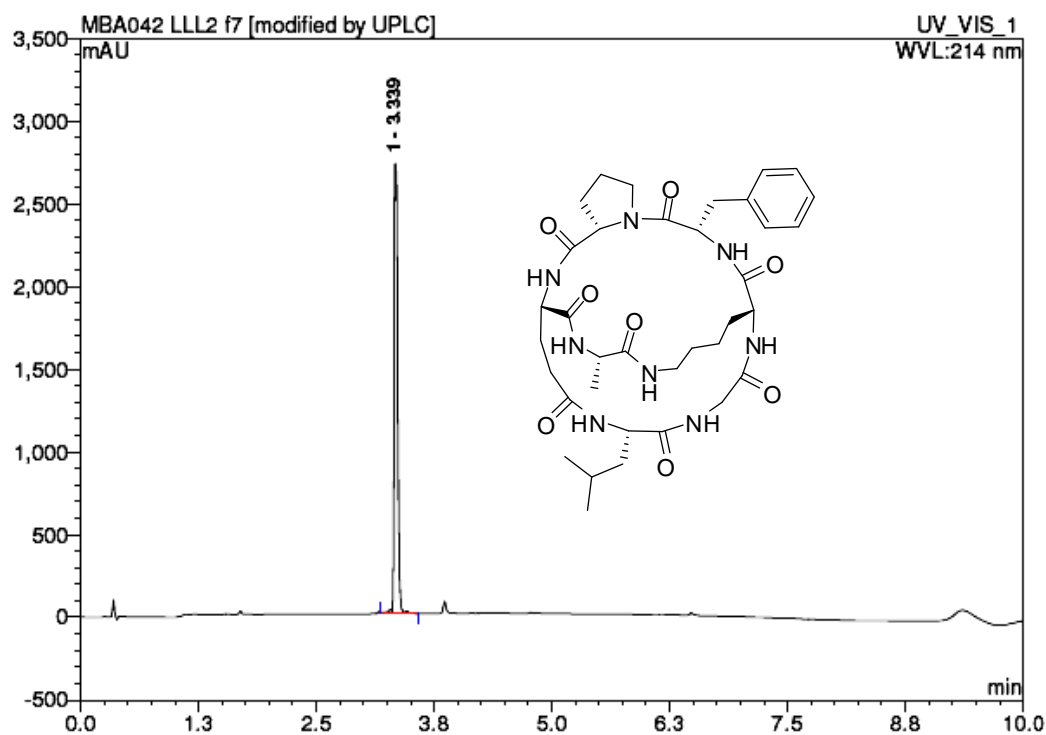

C:\Xcalibur\...Bartoloni MBA 042 LLL2  
 NSI pos ACN + 0.1%HFo  
 University of Bern, Department of Chemistry and Biochemistry  
 Mass Spectrometry Service, Schuerch Group  
 Bartoloni MBA 042 LLL2 #1-5 RT: 0.0-0.1 AV: 5 NL: 1.46E8  
 T: FTMS + p NSI Full ms [195.00-2000.00]

3/5/2012 8:50:58 AM

MBA 042 LLL2

LTQ Orbitrap XL

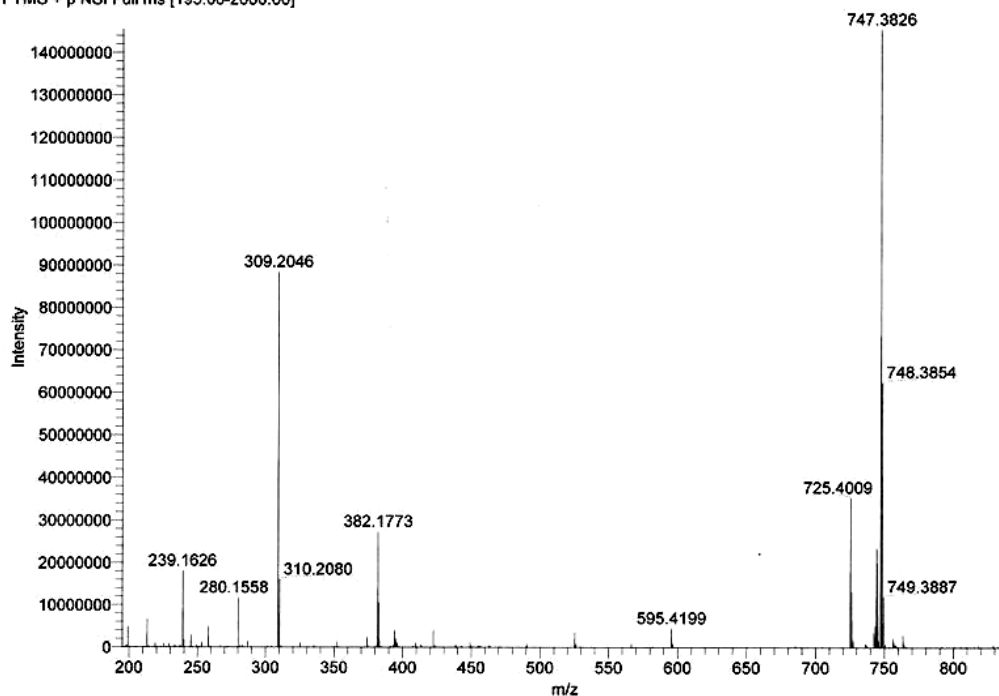

006711\_MBA042LLL2 2 1 "C:\Documents and Settings\Orgchem\Desktop"

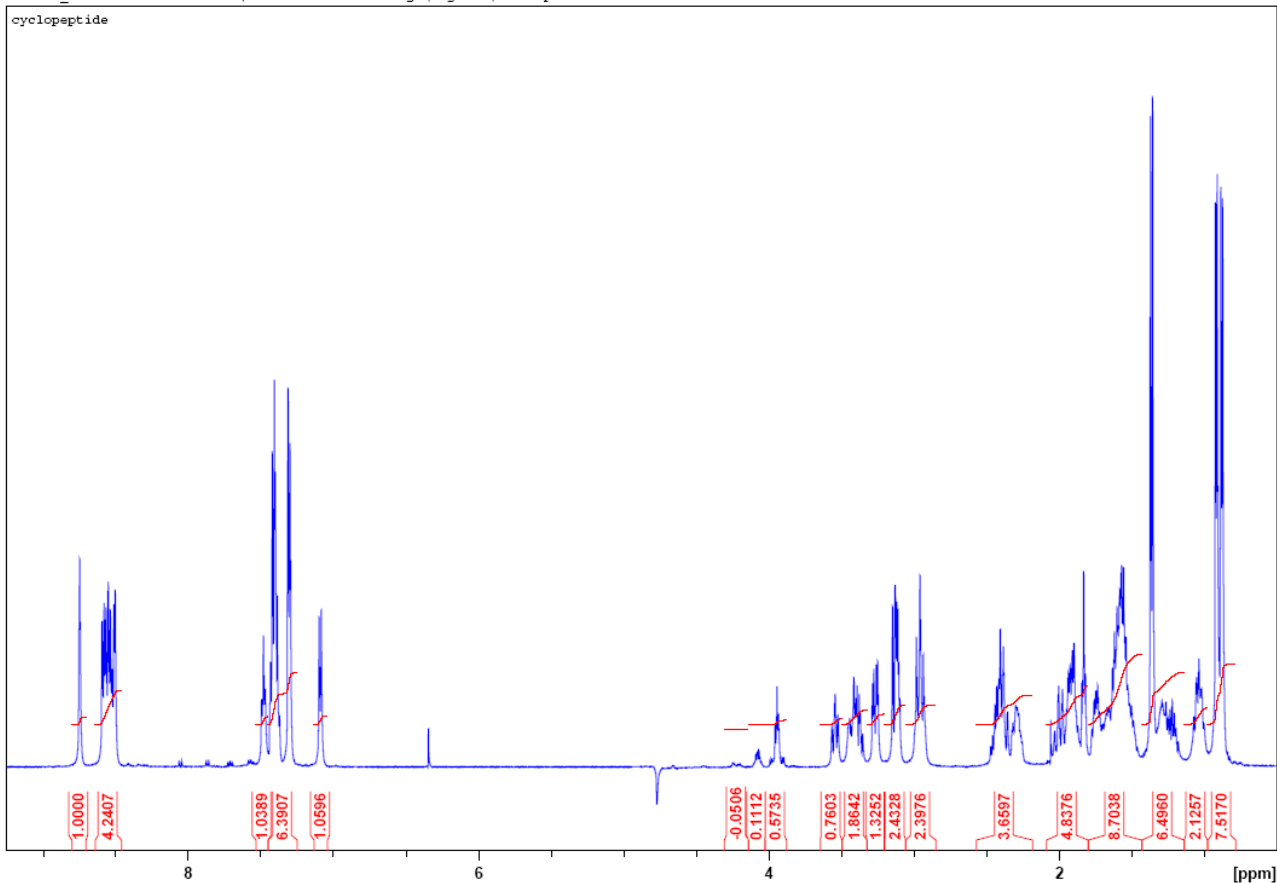

| <sup>1</sup> H-NMR (500 MHz, H <sub>2</sub> O/D <sub>2</sub> O 9:1) |                    |         |                                 |
|---------------------------------------------------------------------|--------------------|---------|---------------------------------|
| residue                                                             | proton             | δ (ppm) | J (Hz)                          |
| Leu <sup>1</sup>                                                    | NH                 | 8.55    | <sup>3</sup> J(NH-αCH) = 8.00   |
|                                                                     | αCH                | 4.42    |                                 |
|                                                                     | βCH <sub>2</sub>   | 1.58    |                                 |
|                                                                     | γCH                | 1.56    |                                 |
|                                                                     | δ'CH <sub>3</sub>  | 0.89    |                                 |
|                                                                     | δ''CH <sub>3</sub> | 0.85    |                                 |
| Gly <sup>2</sup>                                                    | NH                 | 8.54    | <sup>3</sup> J(NH-α'CH) = 4.22  |
|                                                                     | αCH <sub>2</sub>   | 3.92    | <sup>3</sup> J(NH-α''CH) = 7.94 |
| lys <sup>3</sup>                                                    | αNH                | 7.11    | <sup>3</sup> J(NH-αCH) = 7.50   |
|                                                                     | αCH                | 4.74    |                                 |
|                                                                     | β'CH               | 1.87    |                                 |
|                                                                     | β''CH              | 1.65    |                                 |
|                                                                     | γCH <sub>2</sub>   | 1.01    |                                 |
|                                                                     | δ'CH               | 1.57    |                                 |
|                                                                     | δ''CH              | 1.27    |                                 |
|                                                                     | ε'CH               | 3.39    |                                 |
|                                                                     | ε''CH              | 2.93    | <sup>3</sup> J(NH-ε'CH) = 4.22  |
|                                                                     | εNH                | 7.49    | <sup>3</sup> J(NH-ε''CH) = 7.94 |
| Phe <sup>4</sup>                                                    | NH                 | 8.75    |                                 |
|                                                                     | αCH                | 4.62    |                                 |
|                                                                     | β'CH               | 3.23    |                                 |
|                                                                     | β''CH              | 2.94    |                                 |
|                                                                     | 2,6H               | 7.29    |                                 |
|                                                                     | 3,4,5H             | 7.39    |                                 |

|                  |                  |      |                               |
|------------------|------------------|------|-------------------------------|
| Pro <sup>5</sup> | αCH              | 3.12 |                               |
|                  | β'CH             | 1.90 |                               |
|                  | β''CH            | 1.20 |                               |
|                  | γ'CH             | 1.72 |                               |
|                  | γ''CH            | 1.49 |                               |
|                  | δ'CH             | 3.51 |                               |
| Glu <sup>6</sup> | δ''CH            | 3.35 |                               |
|                  | NH               | 8.61 | <sup>3</sup> J(NH-αCH) = 7.25 |
|                  | αCH              | 4.19 |                               |
|                  | β'CH             | 2.26 |                               |
| Ala <sup>7</sup> | β''CH            | 1.97 |                               |
|                  | γCH <sub>2</sub> | 2.38 |                               |
|                  | NH               | 8.51 | <sup>3</sup> J(NH-αCH) = 4.40 |
|                  | αCH              | 4.06 |                               |
|                  | βCH <sub>3</sub> | 1.34 |                               |

**L<sup>1</sup>GK<sup>2</sup>FPE<sup>1</sup>A<sup>2</sup> (9).**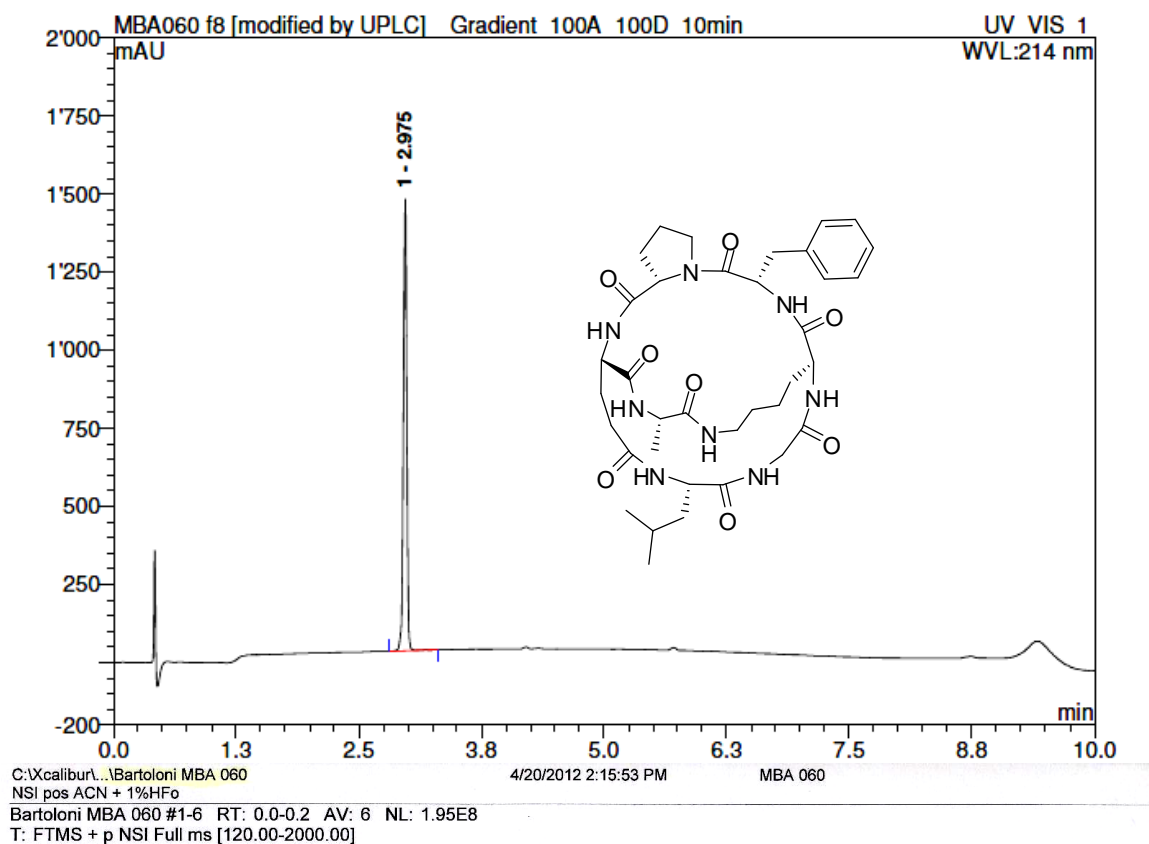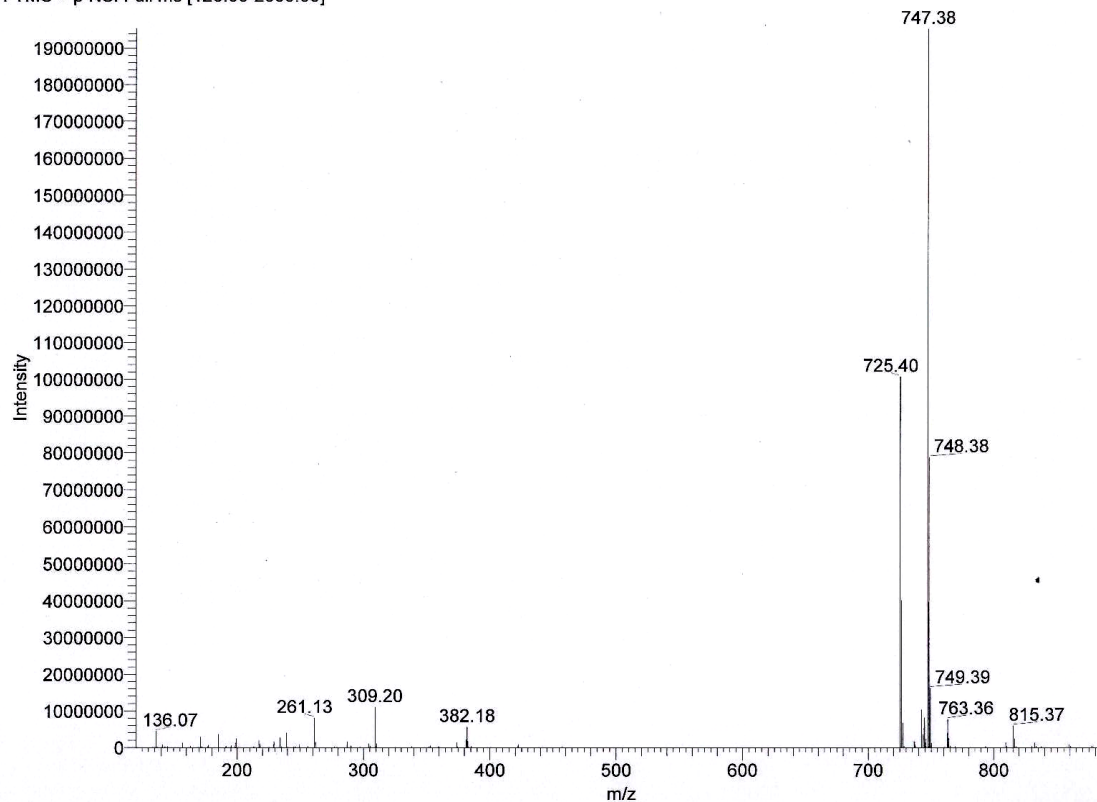

MBA060 1 1 \\130.92.134.128\marco\NMR

cyclopeptide, 298 K

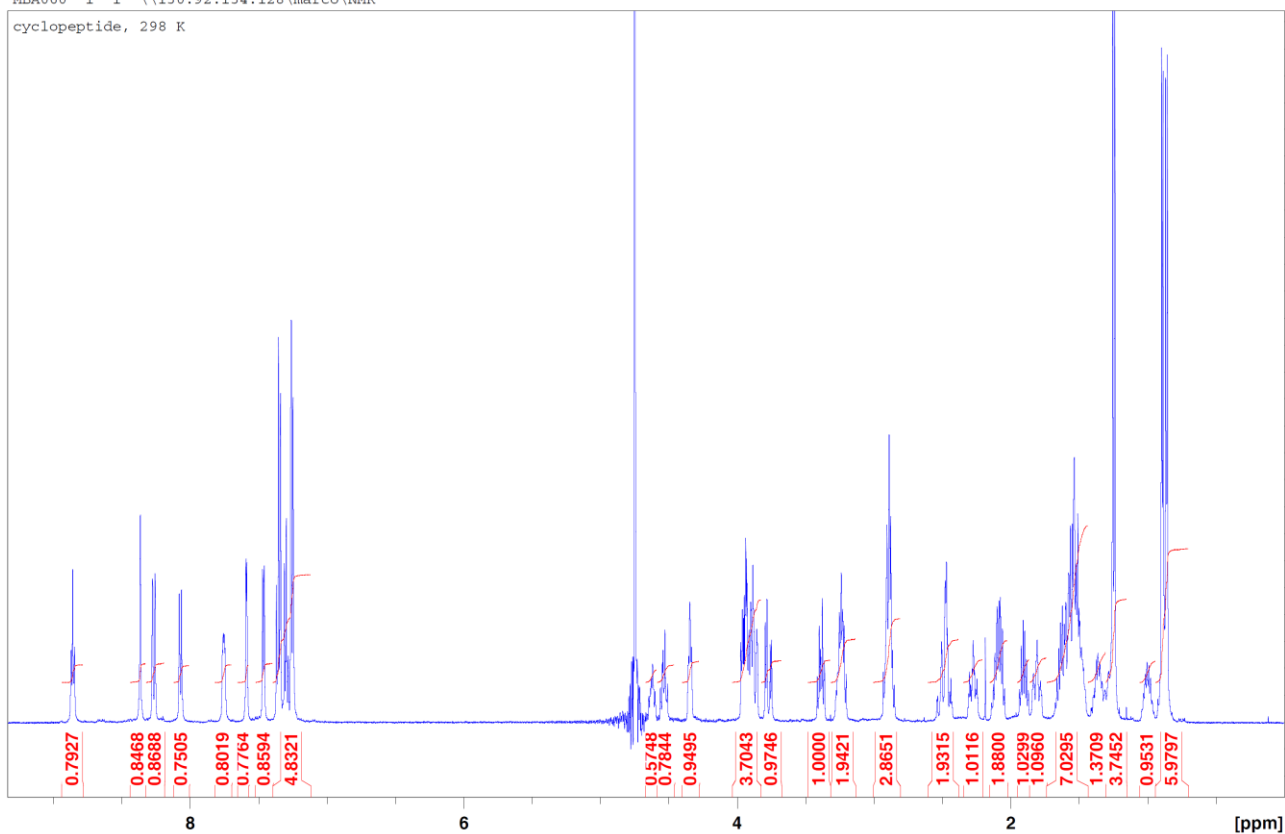

| <b><sup>1</sup>H-NMR (500 MHz, 90% H<sub>2</sub>O/D<sub>2</sub>O)</b> |                       |                |                                         |
|-----------------------------------------------------------------------|-----------------------|----------------|-----------------------------------------|
| <i>residue</i>                                                        | <i>proton</i>         | $\delta$ (ppm) | <i>J</i> (Hz)                           |
| Leu <sup>1</sup>                                                      | NH                    | 8.07           | $^3J(\text{NH}-\alpha\text{CH}) = 8.25$ |
|                                                                       | $\alpha\text{CH}$     | 4.63           |                                         |
|                                                                       | $\beta\text{CH}_2$    | 1.54           |                                         |
|                                                                       | $\gamma\text{CH}$     | 1.58           |                                         |
|                                                                       | $\delta'\text{CH}_3$  | 0.89           |                                         |
| Gly <sup>2</sup>                                                      | $\delta''\text{CH}_3$ | 0.86           |                                         |
|                                                                       | NH                    | 8.86           | $^3J(\text{NH}-\alpha\text{CH}) = 6.10$ |
|                                                                       | $\alpha'\text{CH}$    | 3.95           |                                         |
|                                                                       | $\alpha''\text{CH}$   | 3.77           |                                         |
| Lys <sup>3</sup>                                                      | $\alpha\text{NH}$     | 7.46           | $^3J(\text{NH}-\alpha\text{CH}) = 6.00$ |
|                                                                       | $\alpha\text{CH}$     | 4.35           |                                         |
|                                                                       | $\beta'\text{CH}$     | 2.09           |                                         |
|                                                                       | $\beta''\text{CH}$    | 1.54           |                                         |
|                                                                       | $\gamma'\text{CH}$    | 1.27           |                                         |
|                                                                       | $\gamma''\text{CH}$   | 1.01           |                                         |
|                                                                       | $\delta'\text{CH}$    | 1.48           |                                         |
|                                                                       | $\delta''\text{CH}$   | 1.36           |                                         |
|                                                                       | $\epsilon'\text{CH}$  | 3.25           |                                         |
|                                                                       | $\epsilon''\text{CH}$ | 2.89           |                                         |
| Phe <sup>4</sup>                                                      | $\epsilon\text{NH}$   | 7.75           |                                         |
|                                                                       | NH                    | 8.27           | $^3J(\text{NH}-\alpha\text{CH}) = 9.60$ |

$1^1Gk^2yPE^1a^2$  (10).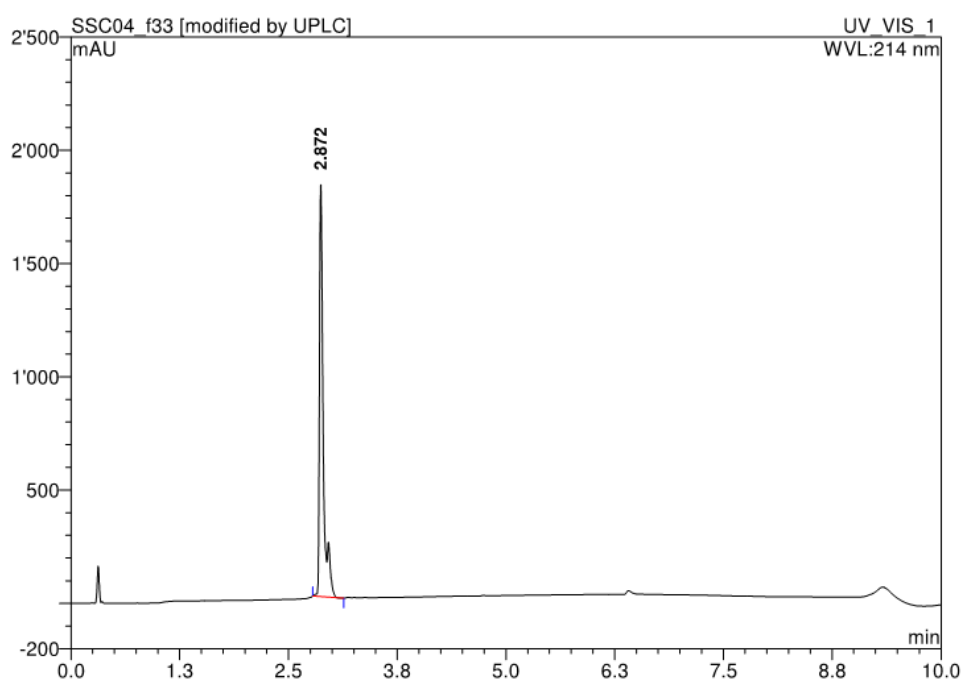

Schmid SSC 04\_130514151807 5/15/2013 10:18:52 AM SSC 04  
 NSI pos H2O ACN + 1%HFo University of Bern, Department of Chemistry and Biochemistry  
 Mass Spectrometry Service - Schuerch Group LTQ Orbitrap XL  
 Schmid SSC 04\_130514151807 #1-8 RT: 0.0-0.2 AV: 8 NL: 1.89E8  
 T: FTMS + p NSI Full ms [150.00-2000.00]

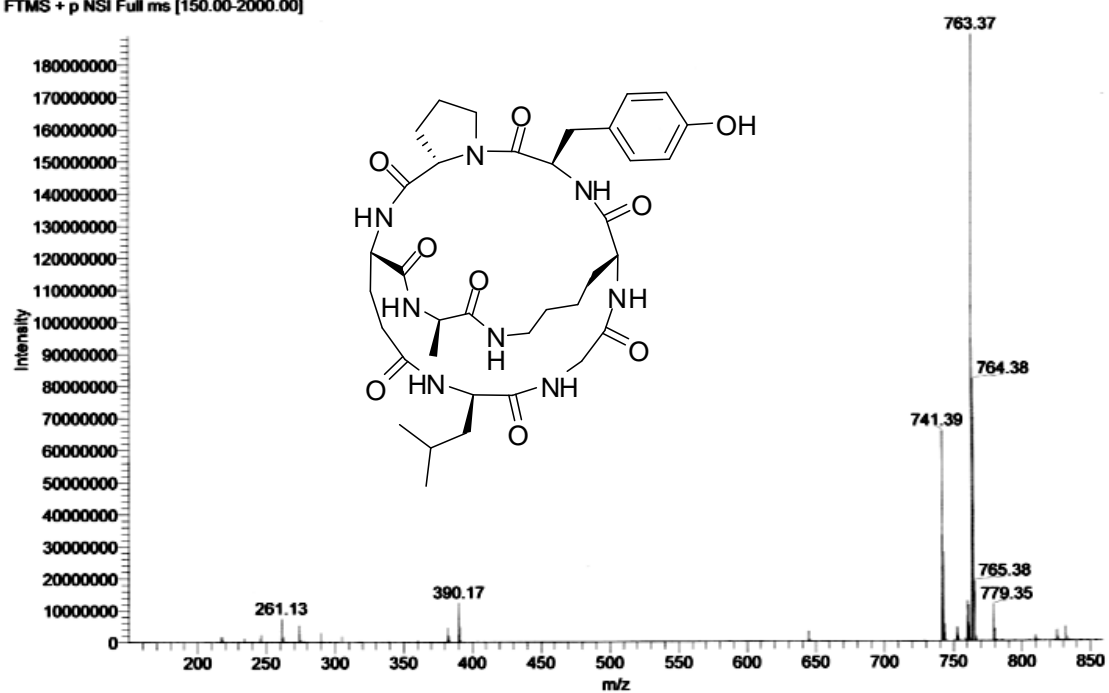

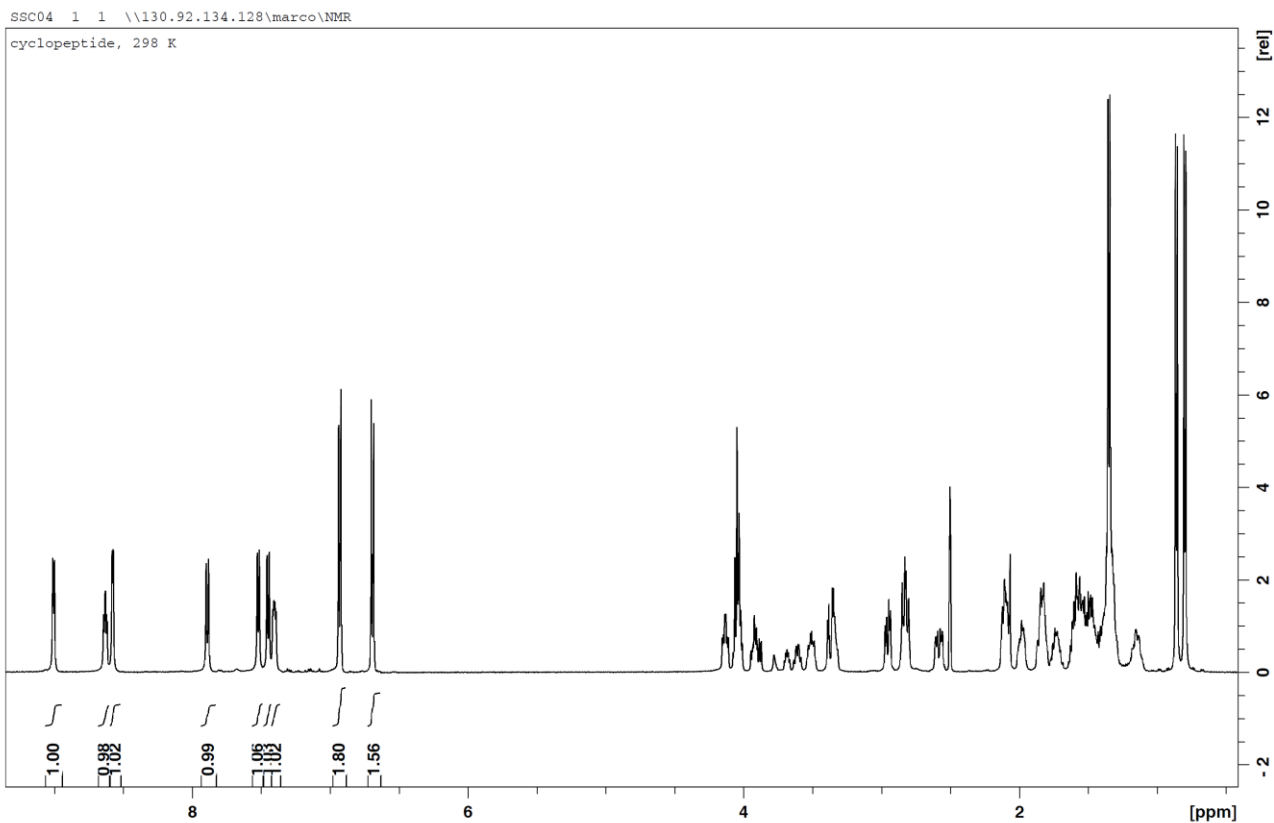

| <sup>1</sup> H-NMR (400 MHz, DMSO- <i>d</i> <sub>6</sub> ) |                    |         |                                 |
|------------------------------------------------------------|--------------------|---------|---------------------------------|
| residue                                                    | proton             | δ (ppm) | J (Hz)                          |
| leu <sup>1</sup>                                           | NH                 | 8.58    | <sup>3</sup> J(NH-αCH) = 4.10   |
|                                                            | αCH                | 3.68    |                                 |
|                                                            | β'CH               | 1.50    |                                 |
|                                                            | β''CH              | 1.34    |                                 |
|                                                            | γCH                | 1.60    |                                 |
|                                                            | δ'CH <sub>3</sub>  | 0.85    |                                 |
|                                                            | δ''CH <sub>3</sub> | 0.79    |                                 |
|                                                            | Gly <sup>2</sup>   | NH      | 8.63                            |
|                                                            | α'CH               | 3.88    | <sup>3</sup> J(NH-α''CH) = 6.73 |
|                                                            | α''CH              | 3.37    |                                 |
| lys <sup>3</sup>                                           | αNH                | 7.89    | <sup>3</sup> J(NH-αCH) = 8.38   |
|                                                            | αCH                | 4.13    |                                 |
|                                                            | β'CH               | 1.57    |                                 |
|                                                            | β''CH              | 1.35    |                                 |
|                                                            | γ'CH               | 1.46    |                                 |
|                                                            | γ''CH              | 1.14    |                                 |
|                                                            | δ'CH               | 1.54    |                                 |
|                                                            | δ''CH              | 1.31    |                                 |
|                                                            | ε'CH               | 3.50    |                                 |
|                                                            | ε''CH              | 2.82    | <sup>3</sup> J(NH-ε'CH) = 3.99  |
|                                                            | εNH                | 7.40    | <sup>3</sup> J(NH-ε''CH) = 7.73 |
| tyr <sup>4</sup>                                           | NH                 | 9.01    | <sup>3</sup> J(NH-αCH) = 5.58   |
|                                                            | αCH                | 4.03    |                                 |
|                                                            | β'CH               | 2.96    |                                 |
|                                                            | β''CH              | 2.82    |                                 |

|                  |                  |      |                               |
|------------------|------------------|------|-------------------------------|
| Pro <sup>5</sup> | 2,6H             | 6.93 |                               |
|                  | 3,5H             | 6.69 |                               |
|                  | αCH              | 4.05 |                               |
|                  | β'CH             | 2.08 |                               |
|                  | β''CH            | 1.41 |                               |
|                  | γ'CH             | 1.82 |                               |
|                  | γ''CH            | 1.72 |                               |
|                  | δ'CH             | 3.61 |                               |
| Glu <sup>6</sup> | δ''CH            | 3.32 |                               |
|                  | NH               | 7.45 | <sup>3</sup> J(NH-αCH) = 7.92 |
|                  | αCH              | 3.92 |                               |
|                  | β'CH             | 1.98 |                               |
| ala <sup>7</sup> | β''CH            | 1.84 |                               |
|                  | γ'CH             | 2.58 |                               |
|                  | γ''CH            | 2.08 |                               |
|                  | NH               | 7.52 | <sup>3</sup> J(NH-αCH) = 7.07 |
|                  | αCH              | 4.05 |                               |
|                  | βCH <sub>3</sub> | 1.35 |                               |



**$1^1Gk^2yPE^1A^2$  (11).**\\130.92.134.128\marco\LCMS\MBA128LDD\_f2  
10min

15.11.2013 14:53:30

RT: 0.00 - 10.00

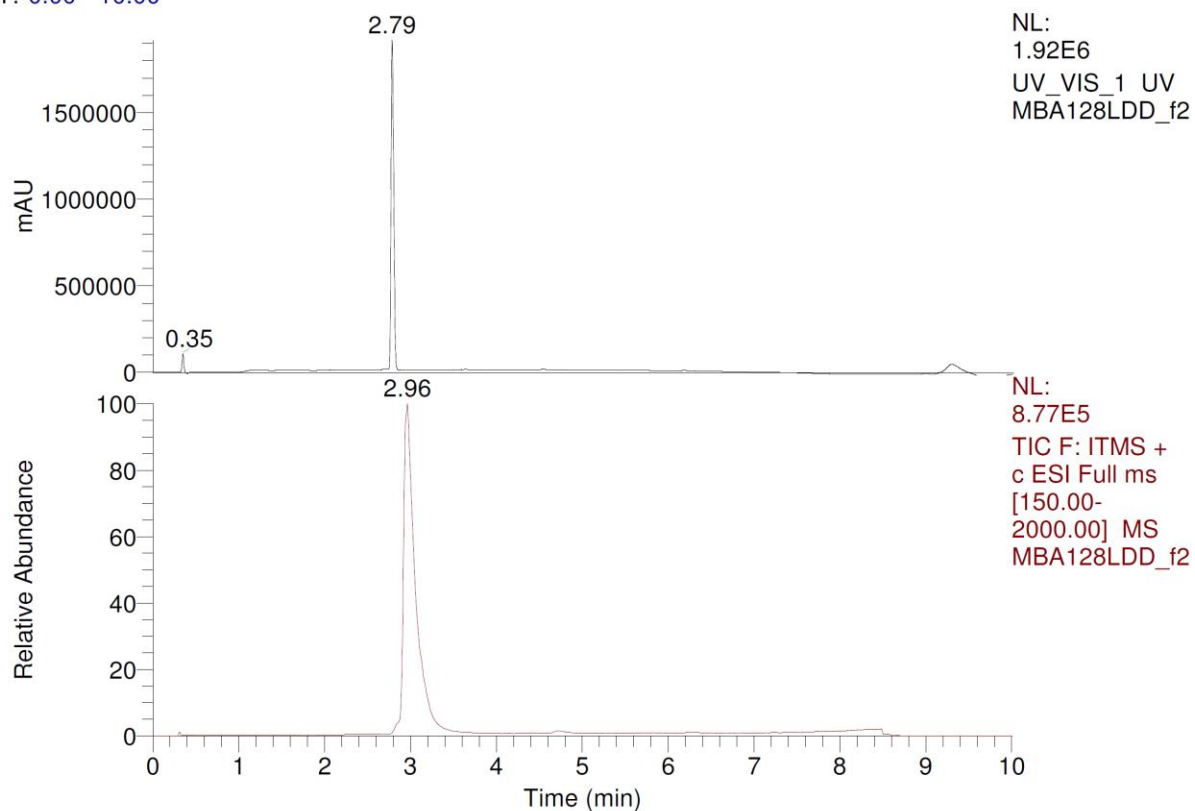

MBA128LDD\_f2 #159 RT: 2.95 AV: 1 NL: 5.13E5

F: ITMS + c ESI Full ms [150.00-2000.00]

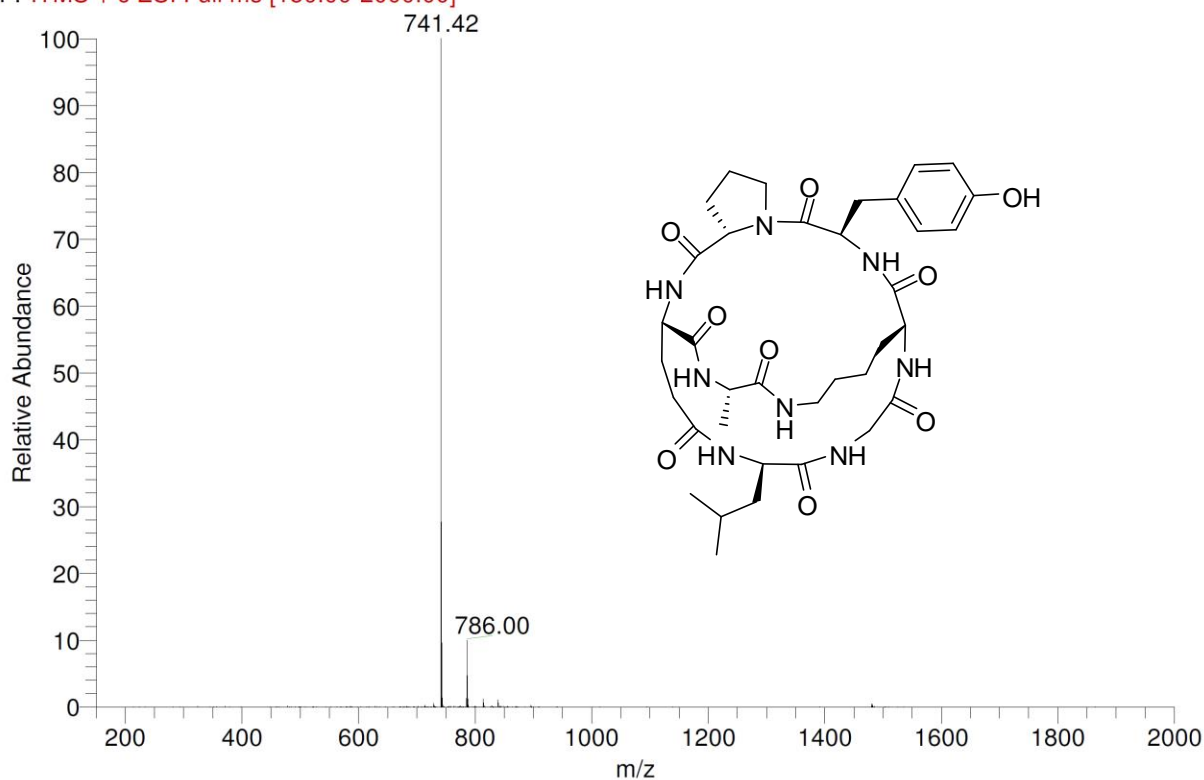

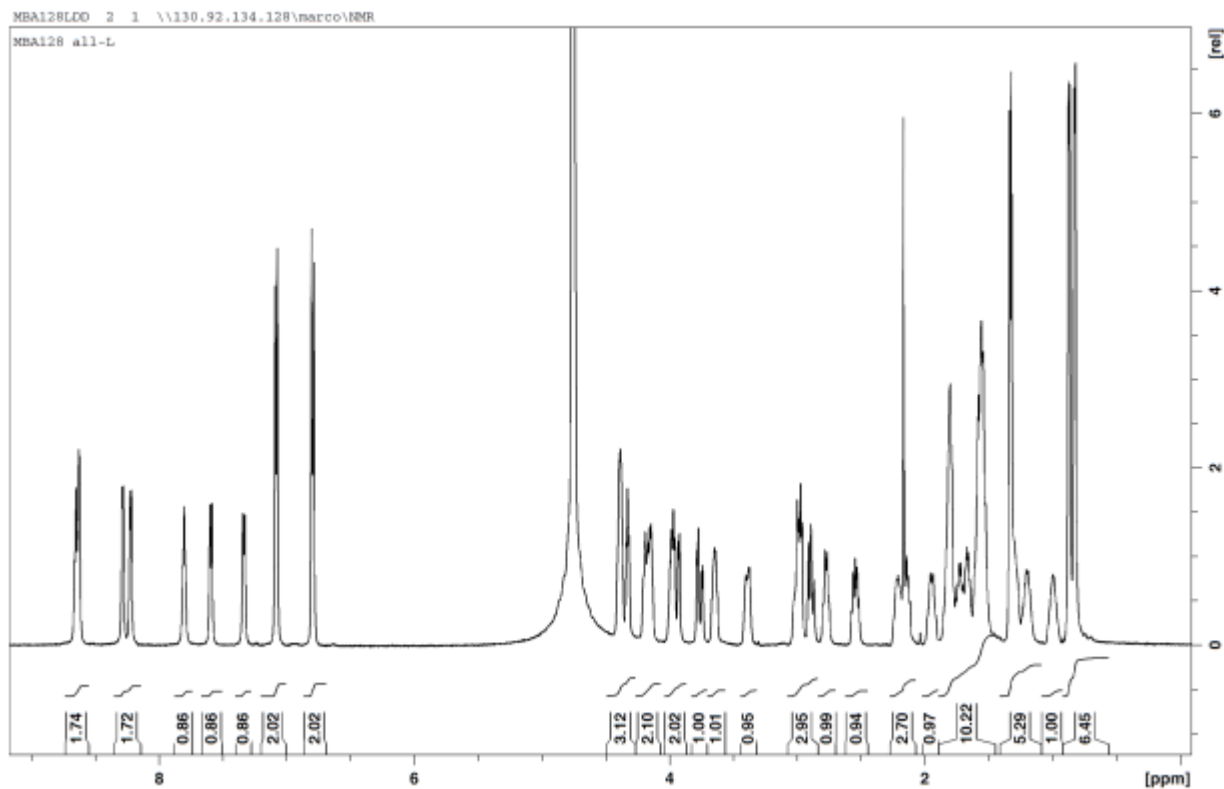

| <sup>1</sup> H-NMR (500 MHz, 90% H <sub>2</sub> O/D <sub>2</sub> O) |                    |         |                               |
|---------------------------------------------------------------------|--------------------|---------|-------------------------------|
| residue                                                             | proton             | δ (ppm) | J (Hz)                        |
| leu <sup>1</sup>                                                    | NH                 | 8.23    | <sup>3</sup> J(NH-αCH) = 5.41 |
|                                                                     | αCH                | 4.15    |                               |
|                                                                     | βCH <sub>2</sub>   | 1.55    |                               |
|                                                                     | γCH                | 1.55    |                               |
|                                                                     | δ'CH <sub>3</sub>  | 0.87    |                               |
|                                                                     | δ''CH <sub>3</sub> | 0.83    |                               |
| Gly <sup>2</sup>                                                    | NH                 | 8.65    |                               |
|                                                                     | α'CH               | 3.95    |                               |
|                                                                     | α''CH              | 3.76    |                               |
|                                                                     | γ'CH               | 1.21    |                               |
|                                                                     | γ''CH              | 1.00    |                               |
| lys <sup>3</sup>                                                    | αNH                | 7.34    | <sup>3</sup> J(NH-αCH) = 7.19 |
|                                                                     | αCH                | 4.38    |                               |
|                                                                     | β'CH               | 1.82    |                               |
|                                                                     | β''CH              | 1.59    |                               |
|                                                                     | γ'CH               | 1.21    |                               |
|                                                                     | γ''CH              | 1.00    |                               |
|                                                                     | δ'CH               | 1.57    |                               |
|                                                                     | δ''CH              | 1.30    |                               |
|                                                                     | ε'CH               | 3.39    |                               |
| ε''CH                                                               | 3.01               |         |                               |
| tyr <sup>4</sup>                                                    | εNH                | 7.80    |                               |
|                                                                     | NH                 | 8.63    | <sup>3</sup> J(NH-αCH) = 2.86 |
|                                                                     | αCH                | 4.40    |                               |
|                                                                     | β'CH               | 2.98    |                               |
|                                                                     | β''CH              | 2.89    |                               |
|                                                                     | 2,6H               | 7.09    |                               |

|                  |                  |      |                               |
|------------------|------------------|------|-------------------------------|
| Pro <sup>5</sup> | 3,5H             | 6.80 |                               |
|                  | αCH              | 4.33 |                               |
|                  | βCH <sub>2</sub> | 1.81 |                               |
|                  | γ'CH             | 1.73 |                               |
|                  | γ''CH            | 1.67 |                               |
| Glu <sup>6</sup> | δ'CH             | 3.65 |                               |
|                  | δ''CH            | 2.78 |                               |
|                  | NH               | 7.60 | <sup>3</sup> J(NH-αCH) = 7.59 |
|                  | αCH              | 4.19 |                               |
|                  | β'CH             | 2.22 |                               |
| Ala <sup>7</sup> | β''CH            | 1.95 |                               |
|                  | γ'CH             | 2.55 |                               |
|                  | γ''CH            | 2.15 |                               |
| Ala <sup>7</sup> | NH               | 8.29 | <sup>3</sup> J(NH-αCH) = 4.36 |
|                  | αCH              | 3.99 |                               |
|                  | βCH <sub>3</sub> | 1.33 |                               |

**I<sup>1</sup>Gk<sup>2</sup>YPE<sup>1</sup>a<sup>2</sup> (12)**\\130.92.134.128\marco\LCMS\MBA128DLD\_f7  
10min

12.11.2013 16:19:53

RT: 0.00 - 10.00

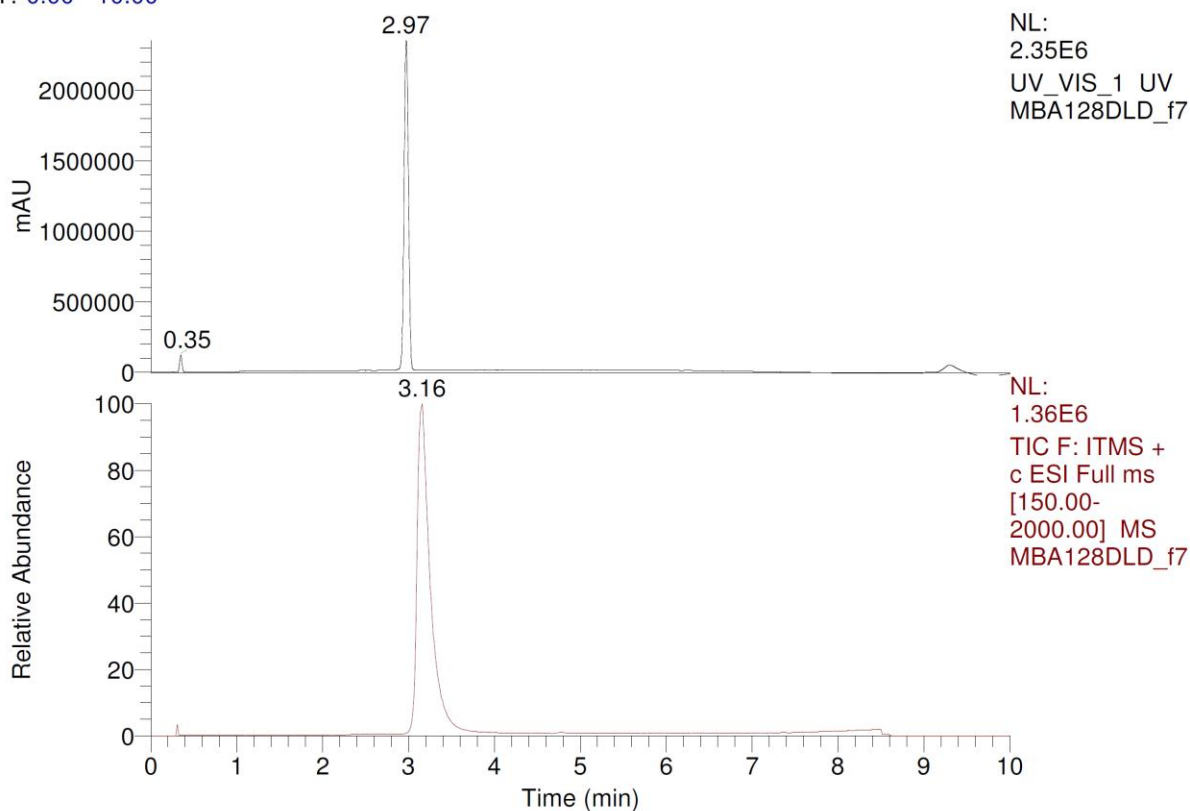

MBA128DLD\_f7 #170 RT: 3.15 AV: 1 NL: 6.99E5

F: ITMS + c ESI Full ms [150.00-2000.00]

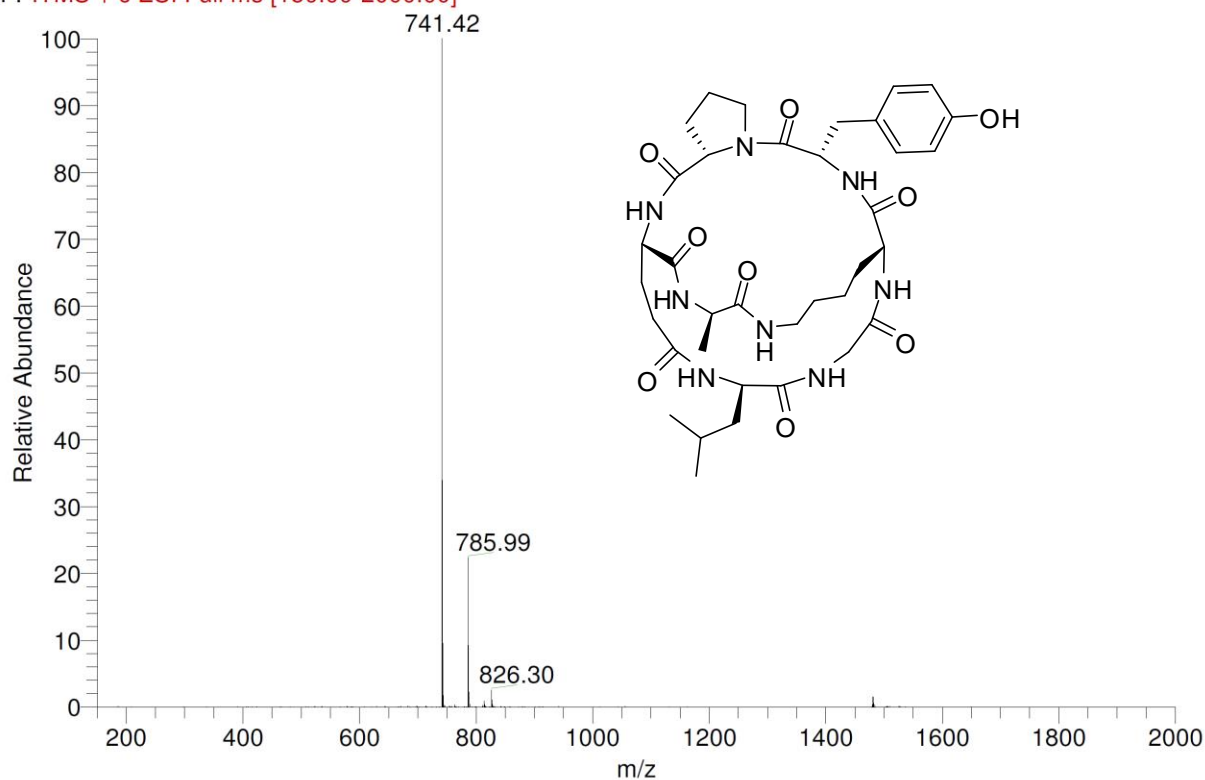

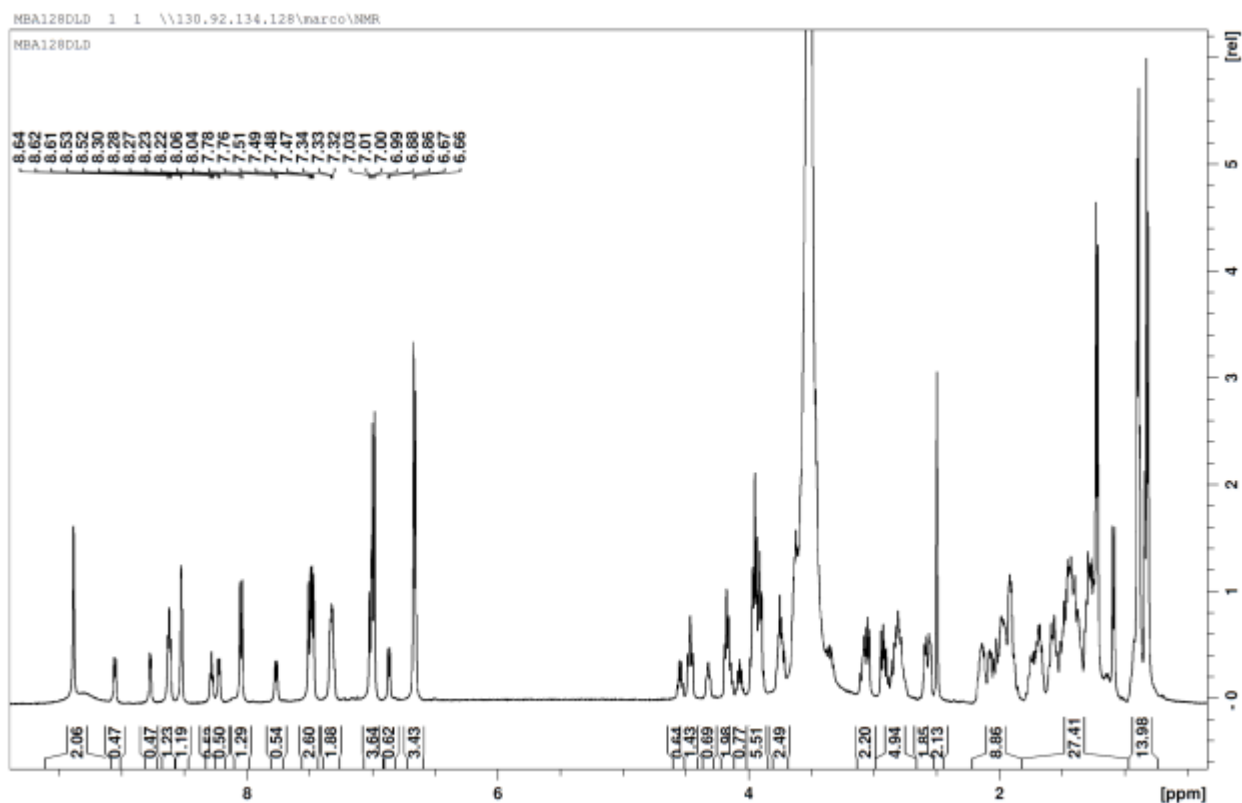

| <sup>1</sup> H-NMR (400 MHz, DMSO- <i>d</i> <sub>6</sub> ) |               |                                   |                                 |                                                                                                          |
|------------------------------------------------------------|---------------|-----------------------------------|---------------------------------|----------------------------------------------------------------------------------------------------------|
| residue                                                    | proton        | $\delta$ (ppm)<br>trans conf. (A) | $\delta$ (ppm)<br>cis conf. (B) | <i>J</i> (Hz)                                                                                            |
| leu <sup>1</sup>                                           | NH            | 8.53                              | 8.23                            | <sup>3</sup> <i>J</i> (NH- $\alpha$ CH) = 3.01 (A)<br><sup>3</sup> <i>J</i> (NH- $\alpha$ CH) = 6.40 (B) |
| Gly <sup>2</sup>                                           | NH            | 8.62                              | 8.28                            |                                                                                                          |
| lys <sup>3</sup>                                           | $\alpha$ NH   | 8.05                              | 6.87                            | <sup>3</sup> <i>J</i> (NH- $\alpha$ CH) = 8.26 (A)                                                       |
|                                                            | $\epsilon$ NH | 7.33                              | 7.33                            | <sup>3</sup> <i>J</i> (NH- $\alpha$ CH) = 7.06 (B)                                                       |
| Tyr <sup>4</sup>                                           | NH            | 9.39                              | 9.06                            | <sup>3</sup> <i>J</i> (NH- $\alpha$ CH) = 1.11 (A)<br><sup>3</sup> <i>J</i> (NH- $\alpha$ CH) = 6.78 (B) |
| Glu <sup>6</sup>                                           | NH            | 7.50                              | 8.78                            | <sup>3</sup> <i>J</i> (NH- $\alpha$ CH) = 8.62 (A)<br><sup>3</sup> <i>J</i> (NH- $\alpha$ CH) = 5.10 (B) |
| ala <sup>7</sup>                                           | NH            | 7.48                              | 7.77                            | <sup>3</sup> <i>J</i> (NH- $\alpha$ CH) = 6.66 (A)<br><sup>3</sup> <i>J</i> (NH- $\alpha$ CH) = 8.22 (B) |

**L<sup>1</sup>Gk<sup>2</sup>yPE<sup>1</sup>a<sup>2</sup> (13).**\\130.92.134.128\marco\LCMS\MBA128DDL\_f6  
10min

15.11.2013 15:50:27

RT: 0.00 - 10.00

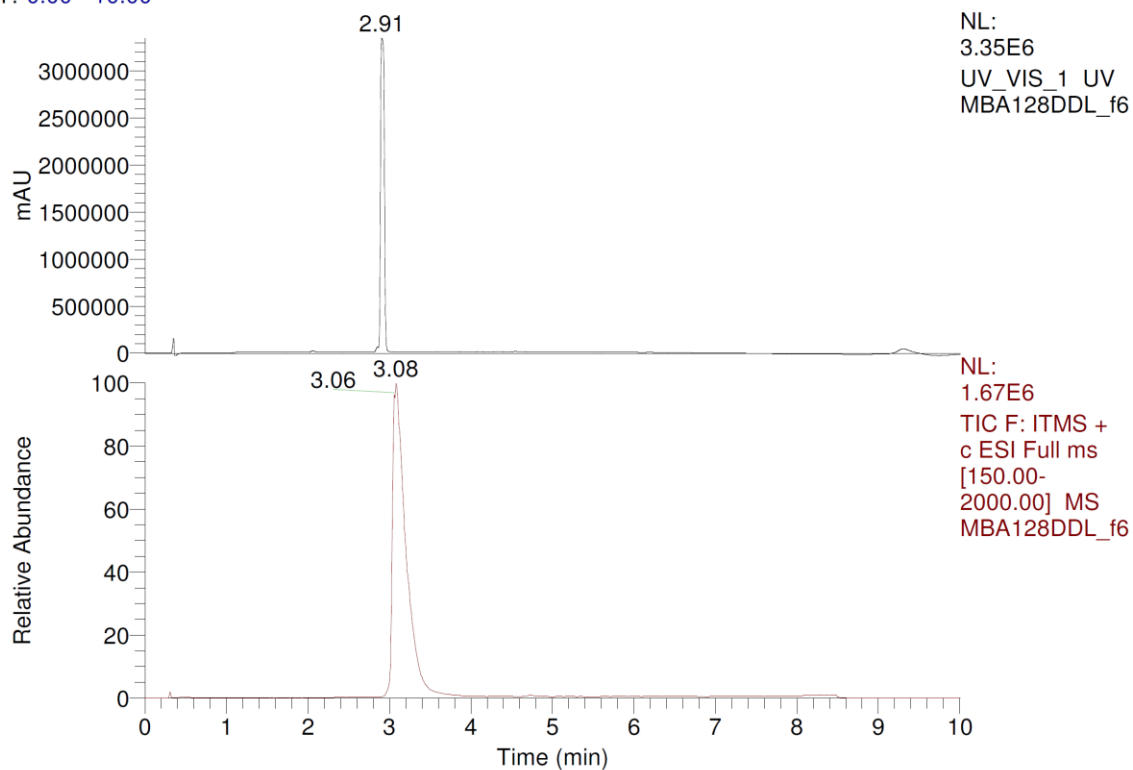

MBA128DDL\_f6 #166 RT: 3.08 AV: 1 NL: 9.13E5

F: ITMS + c ESI Full ms [150.00-2000.00]

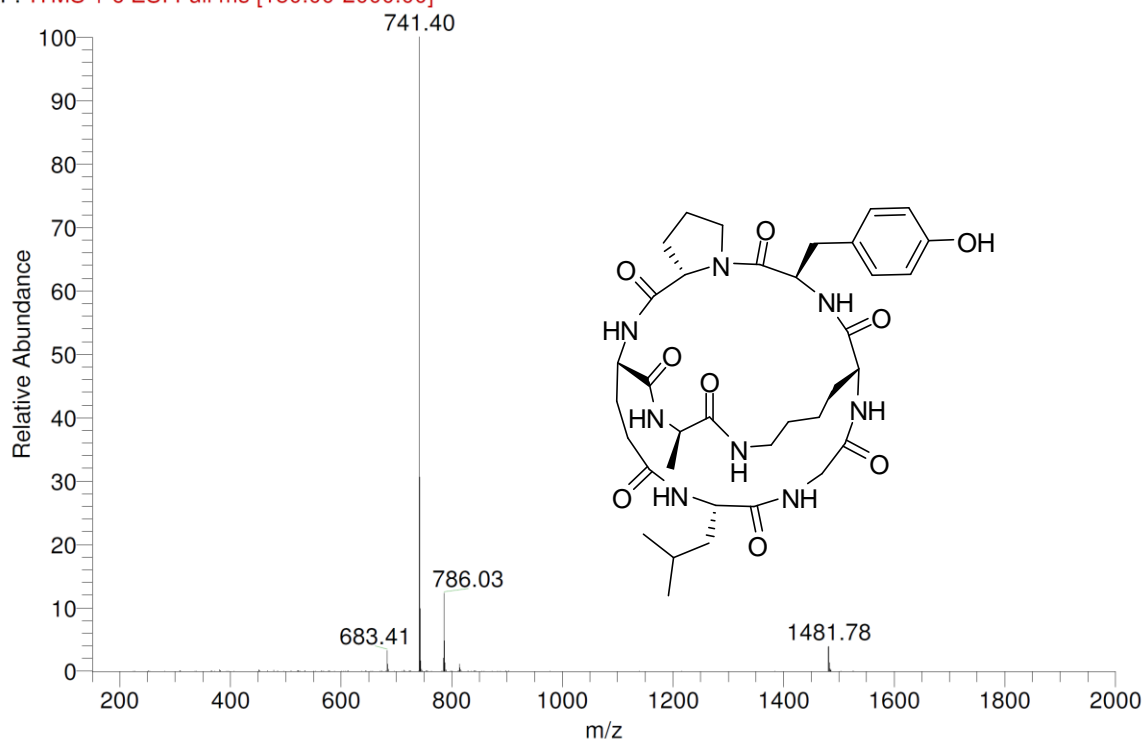

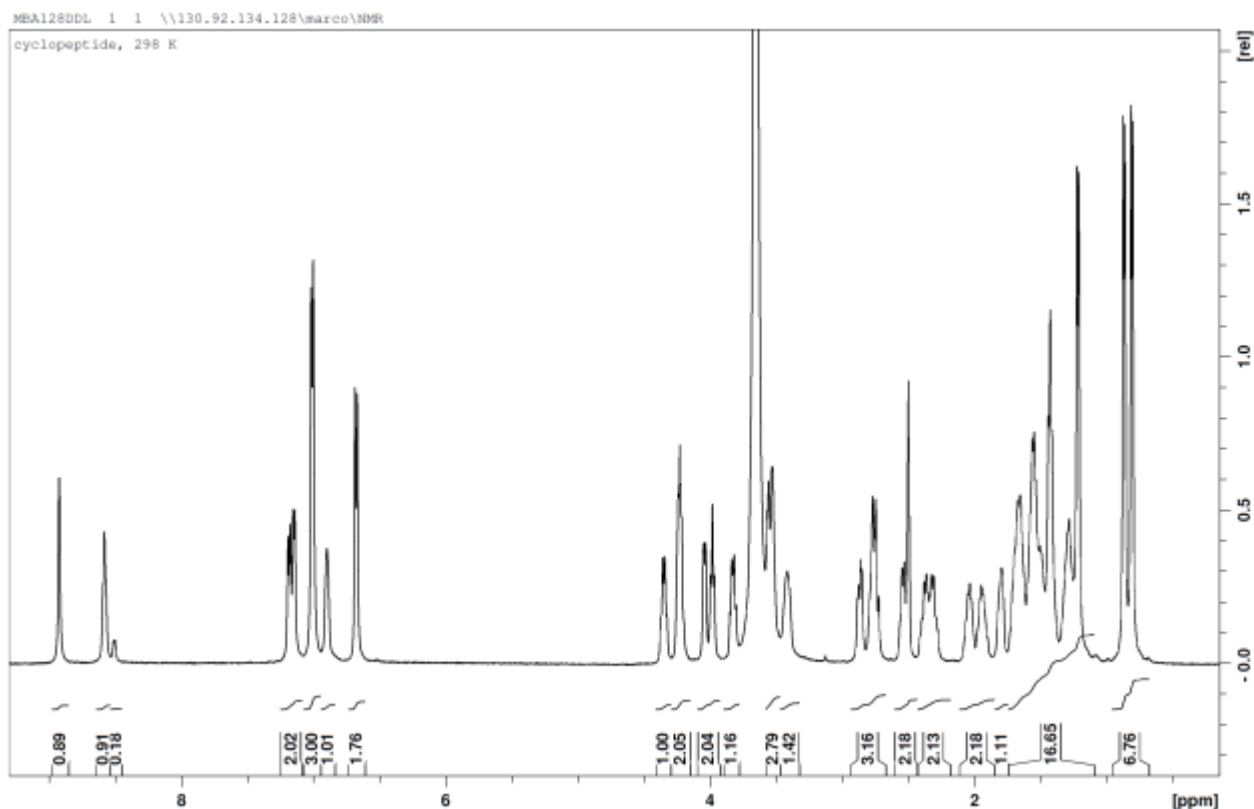
**<sup>1</sup>H-NMR (400 MHz, DMSO-*d*<sub>6</sub>)**

| residue          | proton                | $\delta$ (ppm) | $J$ (Hz)                                |
|------------------|-----------------------|----------------|-----------------------------------------|
| Leu <sup>1</sup> | NH                    | 8.51           | $^3J(\text{NH}-\alpha\text{CH}) = 4.74$ |
|                  | $\alpha\text{CH}$     | 3.99           |                                         |
|                  | $\beta\text{CH}_2$    | 1.43           |                                         |
|                  | $\gamma\text{CH}$     | 1.49           |                                         |
|                  | $\delta'\text{CH}_3$  | 0.87           |                                         |
| Gly <sup>2</sup> | $\delta''\text{CH}_3$ | 0.81           |                                         |
|                  | NH                    | 8.58           |                                         |
|                  | $\alpha'\text{CH}$    | 3.66           |                                         |
| lys <sup>3</sup> | $\alpha''\text{CH}$   | 3.55           |                                         |
|                  | $\alpha\text{CH}$     | 4.35           |                                         |
|                  | $\beta'\text{CH}$     | 1.57           |                                         |
|                  | $\beta''\text{CH}$    | 1.29           |                                         |
|                  | $\gamma\text{CH}_2$   | 1.45           |                                         |
|                  | $\delta'\text{CH}$    | 1.56           |                                         |
|                  | $\delta''\text{CH}$   | 1.29           |                                         |
|                  | $\epsilon'\text{CH}$  | 3.42           |                                         |
|                  | $\epsilon''\text{CH}$ | 2.77           |                                         |
| tyr <sup>4</sup> | $\epsilon\text{NH}$   | 6.90           |                                         |
|                  | NH                    | 8.93           |                                         |
|                  | $\alpha\text{CH}$     | 4.24           |                                         |
|                  | $\beta'\text{CH}$     | 2.86           |                                         |
|                  | $\beta''\text{CH}$    | 2.75           |                                         |
|                  | 2,6H                  | 7.02           |                                         |
|                  | 3,5H                  | 6.68           |                                         |

|                   |                     |      |                                         |
|-------------------|---------------------|------|-----------------------------------------|
| Pro <sup>5</sup>  | $\alpha\text{CH}$   | 4.04 |                                         |
|                   | $\beta'\text{CH}$   | 1.80 |                                         |
|                   | $\beta''\text{CH}$  | 1.70 |                                         |
|                   | $\gamma\text{CH}_2$ | 1.65 |                                         |
|                   | $\delta'\text{CH}$  | 3.54 |                                         |
| Glu <sup>6</sup>  | $\delta''\text{CH}$ | 2.54 |                                         |
|                   | NH                  | 7.15 | $^3J(\text{NH}-\alpha\text{CH}) = 6.39$ |
|                   | $\alpha\text{CH}$   | 3.83 |                                         |
| $\beta'\text{CH}$ | 2.04                |      |                                         |
| ala <sup>7</sup>  | $\beta''\text{CH}$  | 1.94 |                                         |
|                   | $\gamma\text{CH}_2$ | 2.34 |                                         |
|                   | NH                  | 7.19 | $^3J(\text{NH}-\alpha\text{CH}) = 8.20$ |
|                   | $\alpha\text{CH}$   | 4.22 |                                         |
|                   | $\beta\text{CH}_3$  | 1.22 |                                         |

**I<sup>1</sup>Gk<sup>2</sup>YPE<sup>1</sup>A<sup>2</sup> (14).**\\130.92.134.128\marco\LCMS\MBA129LLD\_f4  
10min

19.11.2013 14:03:42

RT: 0.00 - 10.00

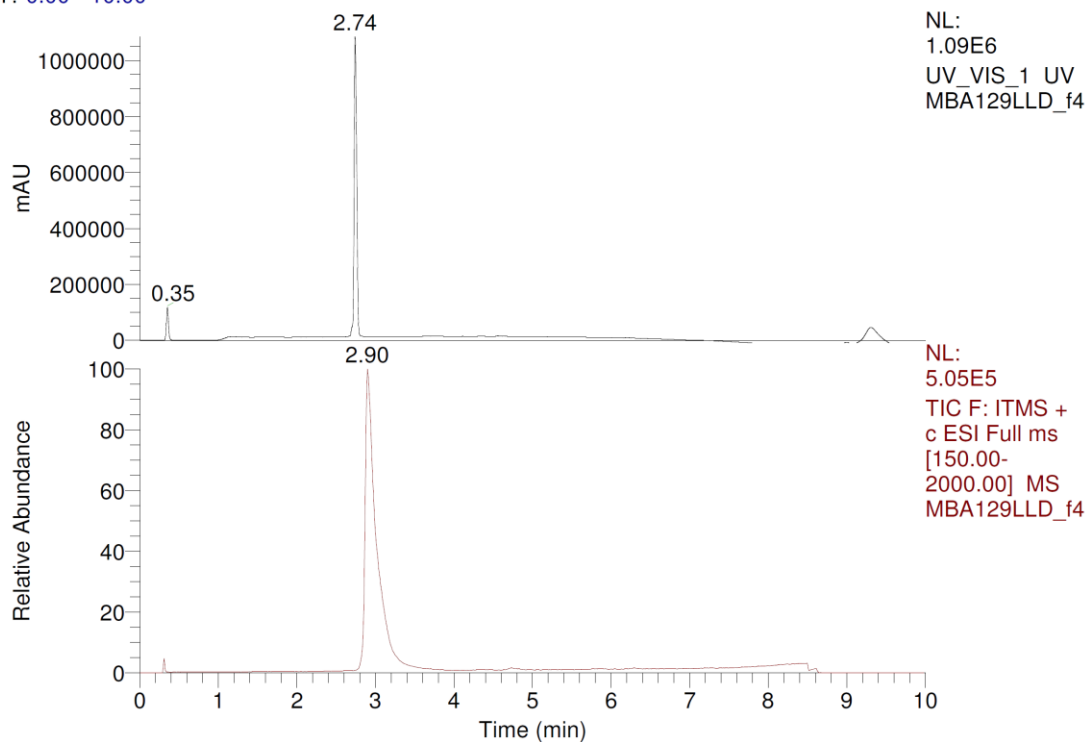

MBA129LLD\_f4 #156 RT: 2.91 AV: 1 NL: 2.55E5

F: ITMS + c ESI Full ms [150.00-2000.00]

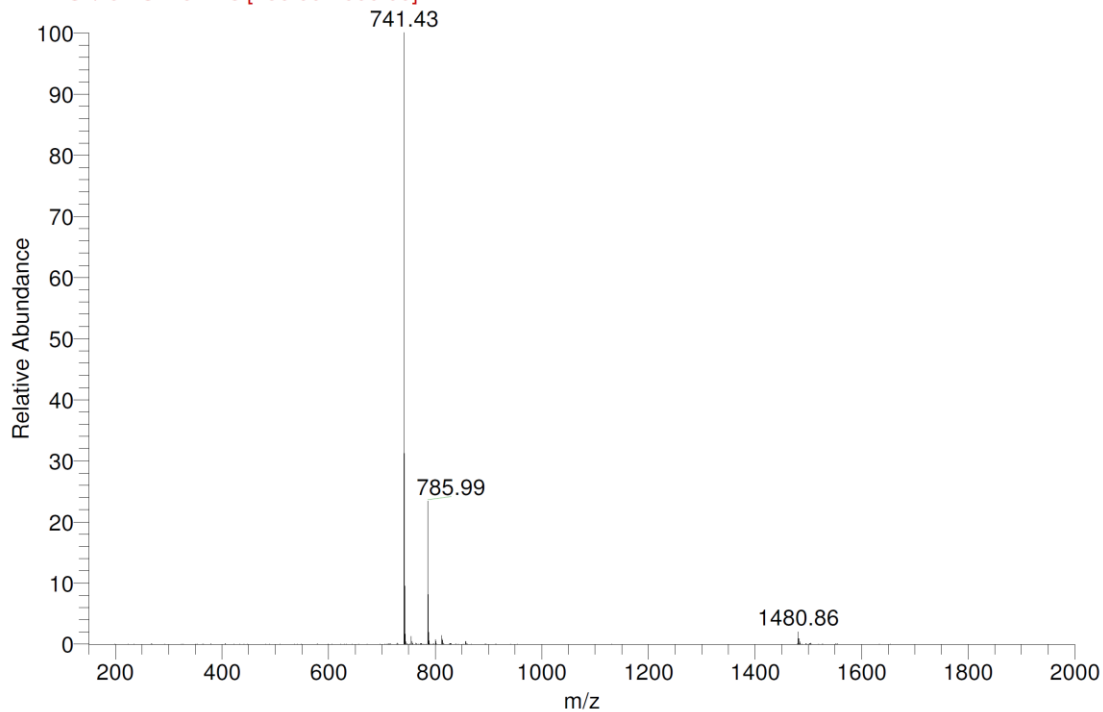

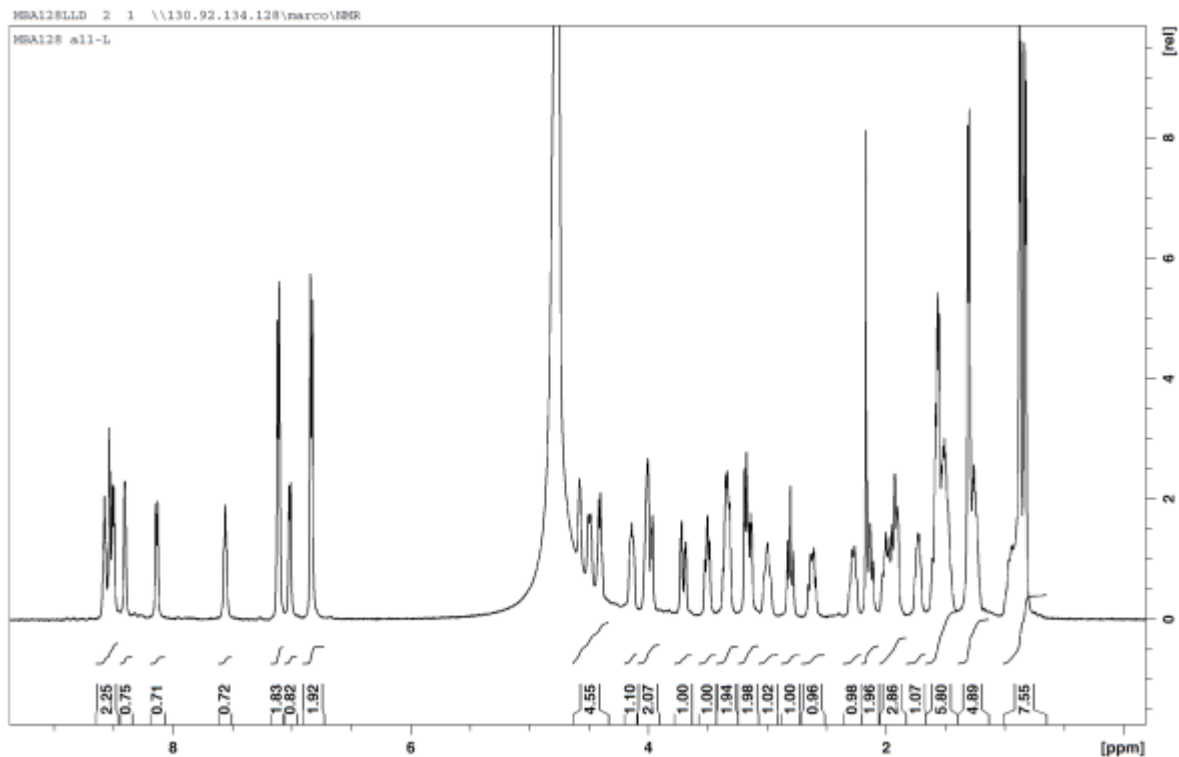
**<sup>1</sup>H-NMR (500 MHz, 90% H<sub>2</sub>O/D<sub>2</sub>O)**

| residue          | proton                | $\delta$ (ppm) | $J$ (Hz)                                |
|------------------|-----------------------|----------------|-----------------------------------------|
| leu <sup>1</sup> | NH                    | 8.14           | $^3J(\text{NH}-\alpha\text{CH}) = 7.26$ |
|                  | $\alpha\text{CH}$     | 4.41           |                                         |
|                  | $\beta\text{CH}_2$    | 1.56           |                                         |
|                  | $\gamma\text{CH}$     | 1.52           |                                         |
|                  | $\delta'\text{CH}_3$  | 0.87           |                                         |
|                  | $\delta''\text{CH}_3$ | 0.83           |                                         |
| Gly <sup>2</sup> | NH                    | 8.58           |                                         |
|                  | $\alpha'\text{CH}$    | 3.98           |                                         |
|                  | $\alpha''\text{CH}$   | 3.70           |                                         |
| lys <sup>3</sup> | $\alpha\text{NH}$     | 7.02           | $^3J(\text{NH}-\alpha\text{CH}) = 6.08$ |
|                  | $\alpha\text{CH}$     | 4.58           |                                         |
|                  | $\beta'\text{CH}$     | 1.99           |                                         |
|                  | $\beta''\text{CH}$    | 1.58           |                                         |
|                  | $\gamma\text{CH}_2$   | 0.92           |                                         |
|                  | $\delta'\text{CH}$    | 1.48           |                                         |
|                  | $\delta''\text{CH}$   | 1.26           |                                         |
|                  | $\epsilon'\text{CH}$  | 3.33           |                                         |
|                  | $\epsilon''\text{CH}$ | 3.00           |                                         |
| Tyr <sup>4</sup> | $\epsilon\text{NH}$   | 7.56           |                                         |
|                  | NH                    | 8.53           |                                         |
|                  | $\alpha\text{CH}$     | 4.49           |                                         |
|                  | $\beta'\text{CH}$     | 3.14           |                                         |
|                  | $\beta''\text{CH}$    | 2.80           |                                         |
|                  | 2,6H                  | 7.11           |                                         |
|                  | 3,5H                  | 6.84           |                                         |

|                  |                     |      |                                         |
|------------------|---------------------|------|-----------------------------------------|
| Pro <sup>5</sup> | $\alpha\text{CH}$   | 3.18 |                                         |
|                  | $\beta'\text{CH}$   | 1.91 |                                         |
|                  | $\beta''\text{CH}$  | 1.25 |                                         |
|                  | $\gamma'\text{CH}$  | 1.73 |                                         |
|                  | $\gamma''\text{CH}$ | 1.45 |                                         |
|                  | $\delta'\text{CH}$  | 3.50 |                                         |
| Glu <sup>6</sup> | $\delta''\text{CH}$ | 3.34 | $^3J(\text{NH}-\alpha\text{CH}) = 7.02$ |
|                  | NH                  | 8.50 |                                         |
|                  | $\alpha\text{CH}$   | 4.13 |                                         |
|                  | $\beta'\text{CH}$   | 2.27 |                                         |
|                  | $\beta''\text{CH}$  | 1.94 |                                         |
| Ala <sup>7</sup> | $\gamma'\text{CH}$  | 2.62 | $^3J(\text{NH}-\alpha\text{CH}) = 3.35$ |
|                  | $\gamma''\text{CH}$ | 2.13 |                                         |
|                  | NH                  | 8.41 |                                         |
|                  | $\alpha\text{CH}$   | 4.02 |                                         |
|                  | $\beta\text{CH}_3$  | 1.31 |                                         |



**L<sup>1</sup>Gk<sup>2</sup>yPE<sup>1</sup>A<sup>2</sup> (15).**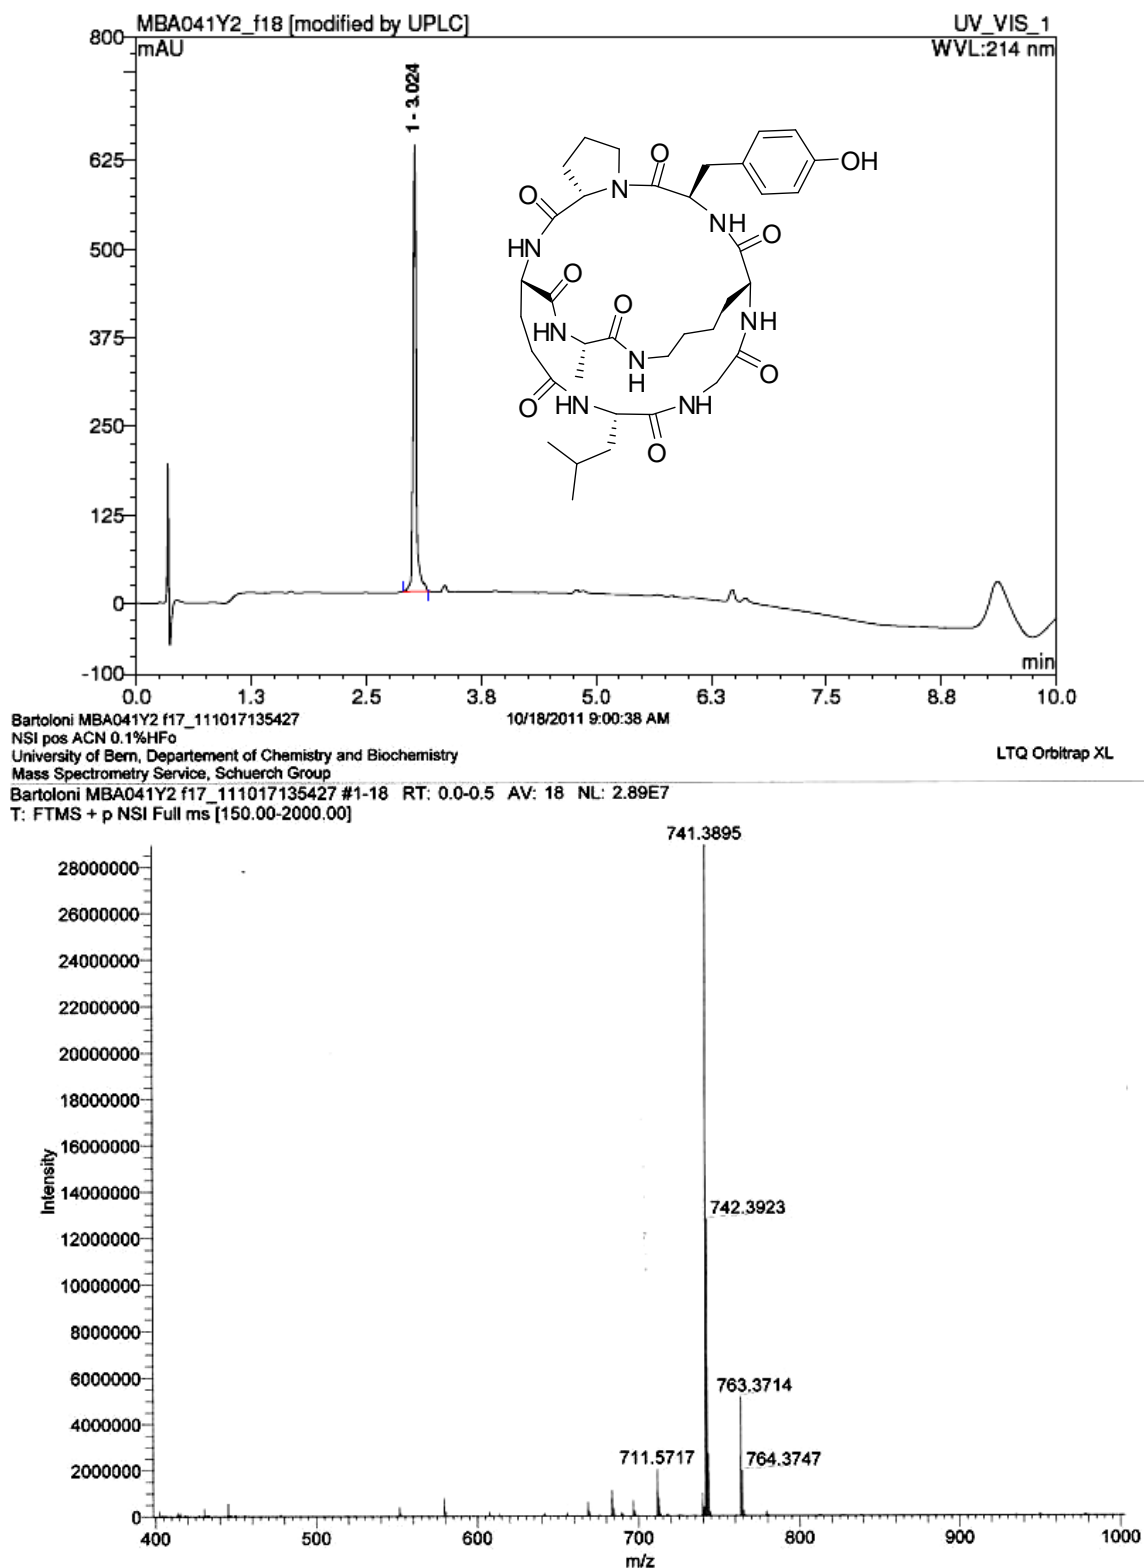

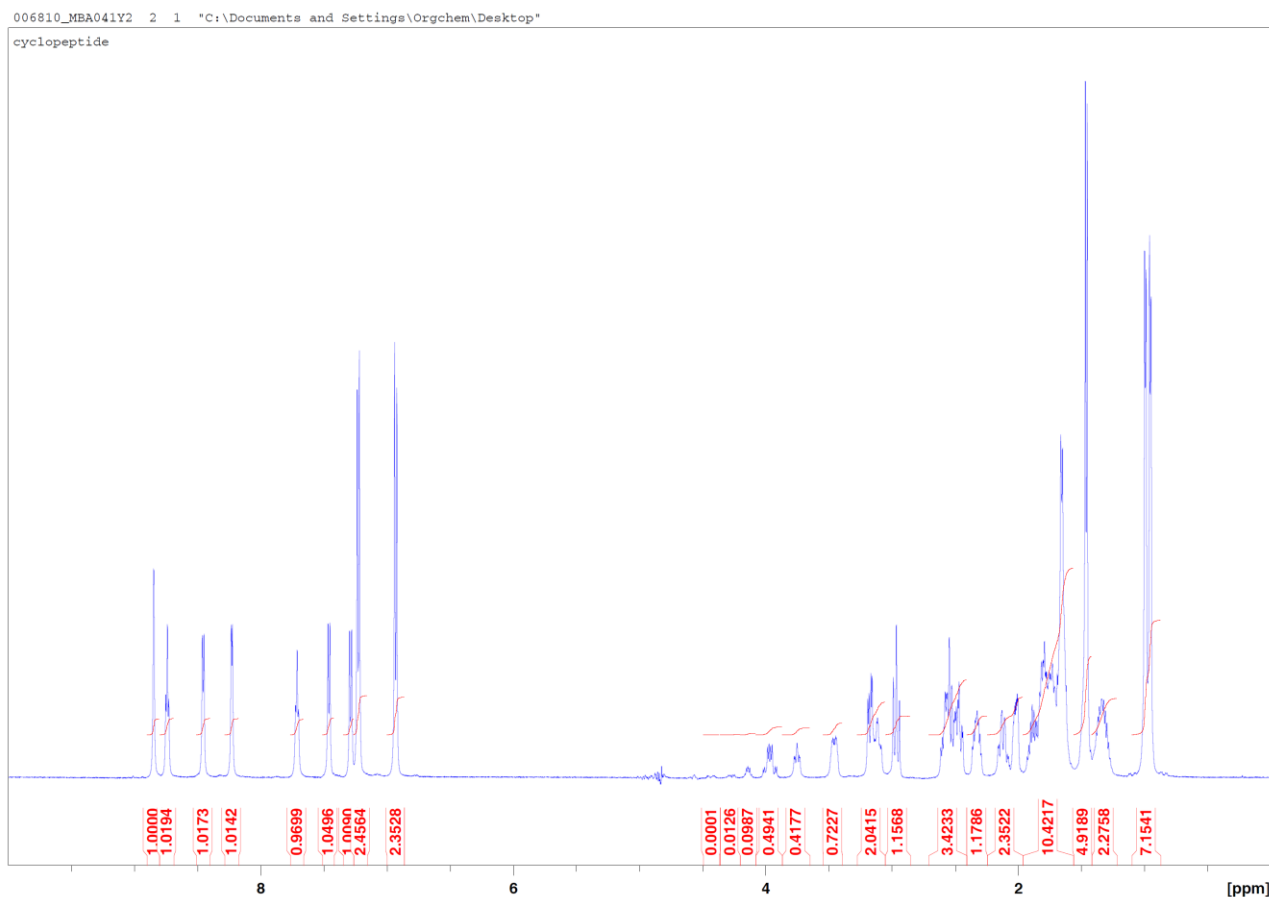**<sup>1</sup>H-NMR (500 MHz, H<sub>2</sub>O/D<sub>2</sub>O 9:1)**

| residue            | proton                | $\delta$ (ppm) | $J$ (Hz)                                |
|--------------------|-----------------------|----------------|-----------------------------------------|
| Leu <sup>1</sup>   | NH                    | 8.39           | $^3J(\text{NH}-\alpha\text{CH}) = 6.32$ |
|                    | $\alpha\text{CH}$     | 4.34           |                                         |
|                    | $\beta\text{CH}_2$    | 1.58           |                                         |
|                    | $\gamma\text{CH}$     | 1.58           |                                         |
|                    | $\delta'\text{CH}_3$  | 0.91           |                                         |
|                    | $\delta''\text{CH}_3$ | 0.87           |                                         |
|                    | Gly <sup>2</sup>      | NH             | 8.65                                    |
| lys <sup>3</sup>   | $\alpha\text{CH}_2$   | 3.89           |                                         |
|                    | $\alpha\text{NH}$     | 7.21           | $^3J(\text{NH}-\alpha\text{CH}) = 8.41$ |
|                    | $\alpha\text{CH}$     | 4.52           |                                         |
|                    | $\beta'\text{CH}$     | 1.80           |                                         |
|                    | $\beta''\text{CH}$    | 1.72           |                                         |
|                    | $\gamma\text{CH}_2$   | 1.26           |                                         |
|                    | $\delta'\text{CH}$    | 1.65           |                                         |
|                    | $\delta''\text{CH}$   | 1.40           |                                         |
|                    | $\epsilon'\text{CH}$  | 3.39           |                                         |
|                    | $\epsilon''\text{CH}$ | 3.04           |                                         |
|                    | $\epsilon\text{NH}$   | 7.64           |                                         |
|                    | tyr <sup>4</sup>      | NH             | 8.77                                    |
| $\alpha\text{CH}$  |                       | 4.46           |                                         |
| $\beta'\text{CH}$  |                       | 3.08           |                                         |
| $\beta''\text{CH}$ |                       | 2.88           |                                         |
| 2,6H               |                       | 7.13           |                                         |
| Pro <sup>5</sup>   | 3,5H                  | 6.85           |                                         |
|                    | $\alpha\text{CH}$     | 4.38           |                                         |

|                  |                     |      |                                         |
|------------------|---------------------|------|-----------------------------------------|
| Glu <sup>6</sup> | $\beta'\text{CH}$   | 1.94 |                                         |
|                  | $\beta''\text{CH}$  | 1.72 |                                         |
|                  | $\gamma'\text{CH}$  | 1.65 |                                         |
|                  | $\gamma''\text{CH}$ | 1.56 |                                         |
|                  | $\delta'\text{CH}$  | 3.66 |                                         |
|                  | $\delta''\text{CH}$ | 2.46 |                                         |
|                  | NH                  | 7.38 | $^3J(\text{NH}-\alpha\text{CH}) = 7.56$ |
| Ala <sup>7</sup> | $\alpha\text{CH}$   | 4.20 |                                         |
|                  | $\beta'\text{CH}$   | 2.25 |                                         |
|                  | $\beta''\text{CH}$  | 2.04 |                                         |
|                  | $\gamma'\text{CH}$  | 2.49 |                                         |
|                  | $\gamma''\text{CH}$ | 2.39 |                                         |
|                  | NH                  | 8.16 | $^3J(\text{NH}-\alpha\text{CH}) = 4.95$ |
|                  | $\alpha\text{CH}$   | 4.06 |                                         |
|                  | $\beta\text{CH}_3$  | 1.38 |                                         |

**L<sup>1</sup>Gk<sup>2</sup>YPE<sup>1</sup>a<sup>2</sup> (16).**\\130.92.134.128\marco\LCMS\MBA128DLL\_f4  
10min

12.11.2013 15:45:48

RT: 0.00 - 10.00

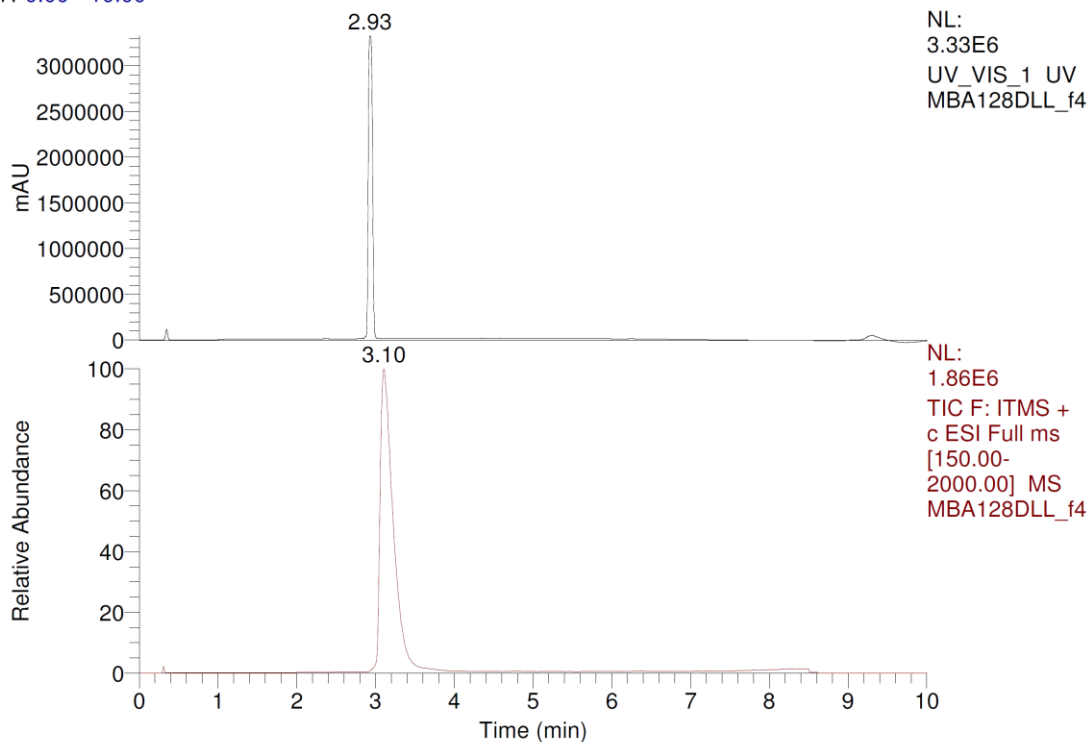

MBA128DLL\_f4 #168 RT: 3.10 AV: 1 NL: 8.93E5

F: ITMS + c ESI Full ms [150.00-2000.00]

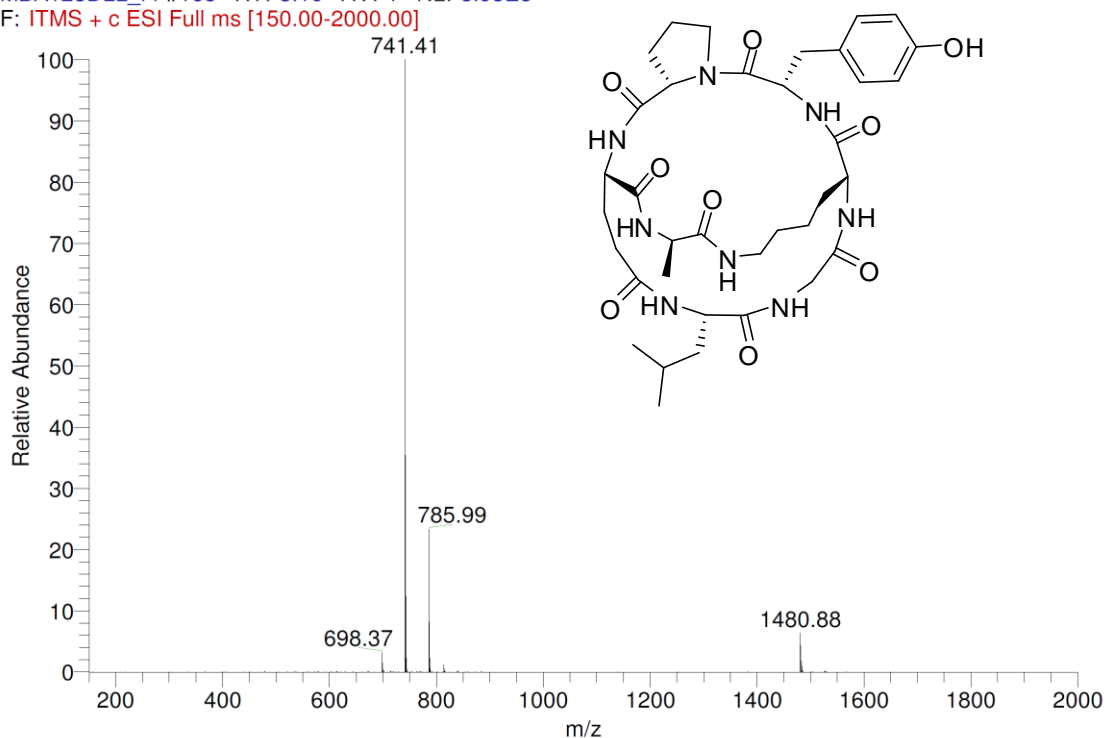

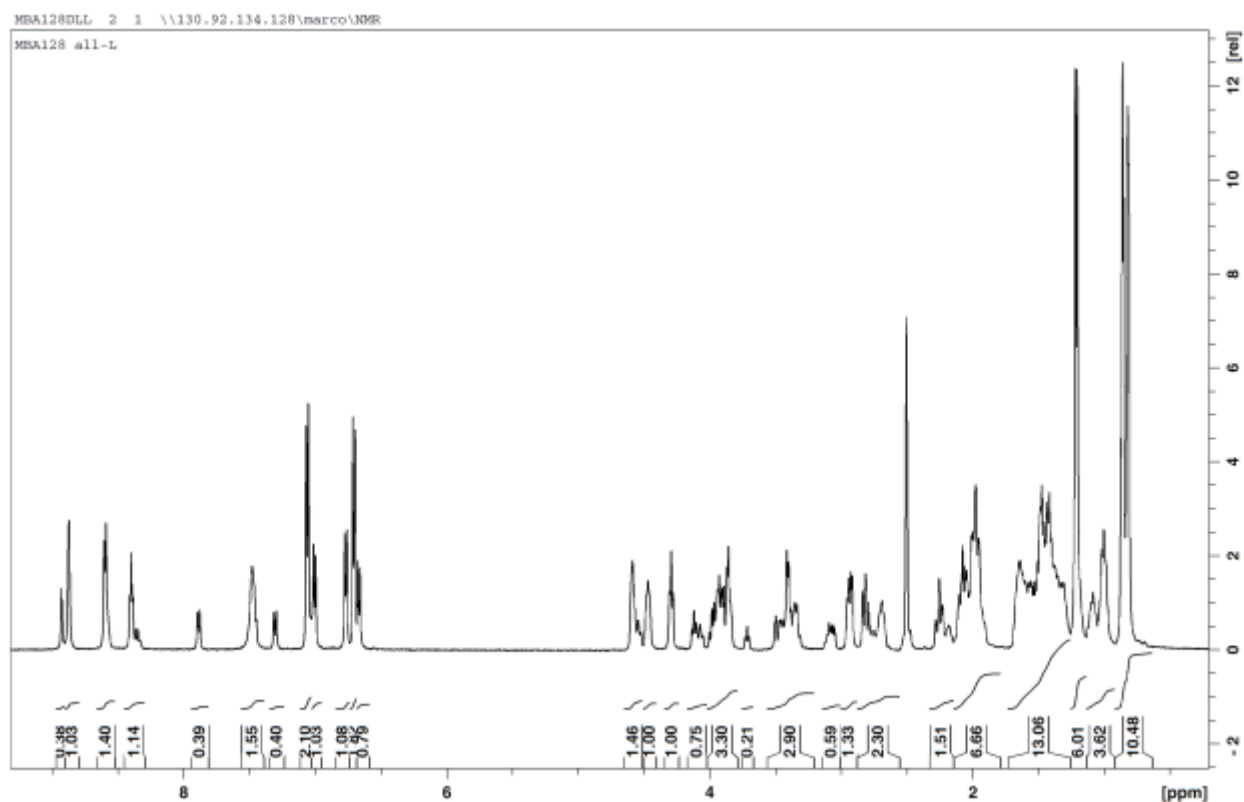

| <b><sup>1</sup>H-NMR (500 MHz, <i>d</i><sub>6</sub>-DMSO)</b> |               |                      |                        |                                                                                                                 |
|---------------------------------------------------------------|---------------|----------------------|------------------------|-----------------------------------------------------------------------------------------------------------------|
| <i>residue</i>                                                | <i>proton</i> | $\delta$ (ppm)       | $\delta$ (ppm)         | <i>J</i> (Hz)                                                                                                   |
|                                                               |               | <i>cis conf.</i> (A) | <i>trans conf.</i> (B) |                                                                                                                 |
| Leu <sup>1</sup>                                              | NH            | 8.36                 | 8.32                   | <sup>3</sup> <i>J</i> (NH- $\alpha$ CH) = 8.15 (A)<br><sup>3</sup> <i>J</i> (NH- $\alpha$ CH) = 3.24 (B)        |
| Gly <sup>2</sup>                                              | NH            | 8.40                 | 8.59                   |                                                                                                                 |
| Lys <sup>3</sup>                                              | $\alpha$ NH   | 6.77                 | 7.89                   | <sup>3</sup> <i>J</i> (NH- $\alpha$ CH) = 7.55 (A)<br><sup>3</sup> <i>J</i> (NH- $\alpha$ CH) = 8.48 (B)        |
|                                                               | $\epsilon$ NH | 7.48                 | 7.03                   |                                                                                                                 |
| Tyr <sup>4</sup>                                              | NH            | 8.87                 | 8.93                   |                                                                                                                 |
| Glu <sup>6</sup>                                              | NH            | 8.60                 | 7.31                   | <sup>3</sup> <i>J</i> (NH- $\alpha$ CH) = 6.49 (A)<br><sup>3</sup> <i>J</i> (NH- $\alpha$ CH) = 9.10 (B)        |
| ala <sup>7</sup>                                              | NH            | <i>n.d.</i>          | 7.46                   | <sup>3</sup> <i>J</i> (NH- $\alpha$ CH) = <i>n.d.</i> (A)<br><sup>3</sup> <i>J</i> (NH- $\alpha$ CH) = 5.94 (B) |

**L<sup>1</sup>Gk<sup>2</sup>YPE<sup>1</sup>A<sup>2</sup> (17).**\\130.92.134.128\marco\LCMS\MBA129LLL\_f5  
10min

19.11.2013 12:15:08

RT: 0.00 - 10.00

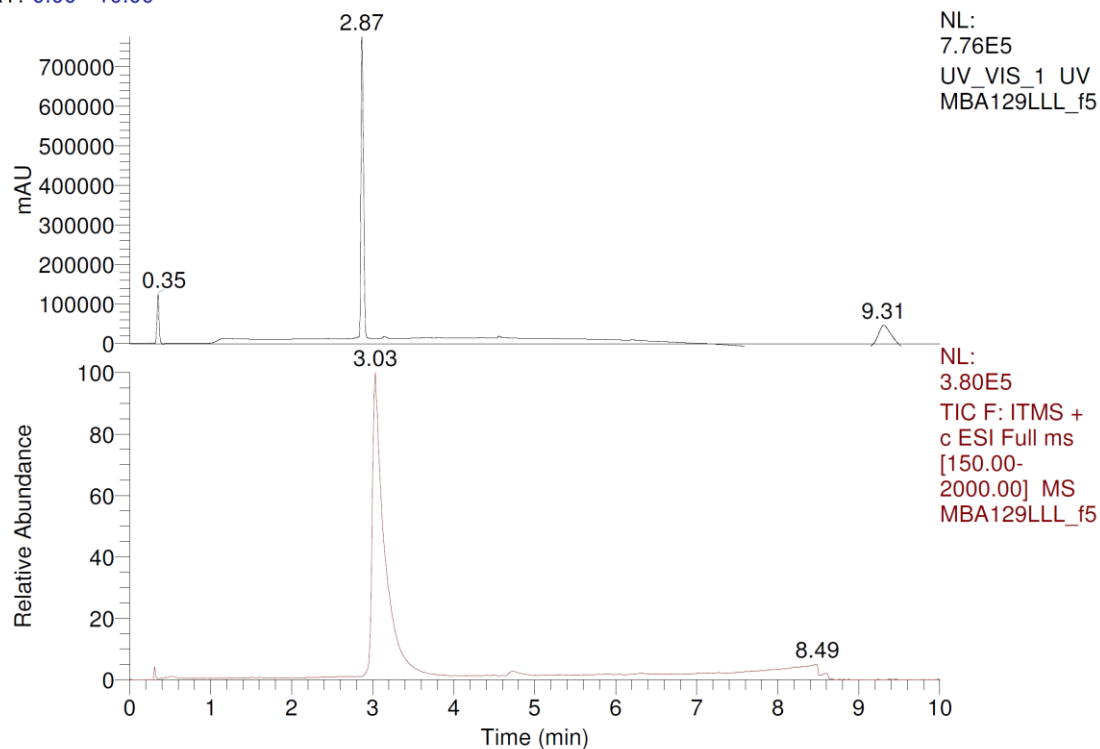

MBA129LLL\_f5 #163 RT: 3.04 AV: 1 NL: 1.61E5

F: ITMS + c ESI Full ms [150.00-2000.00]

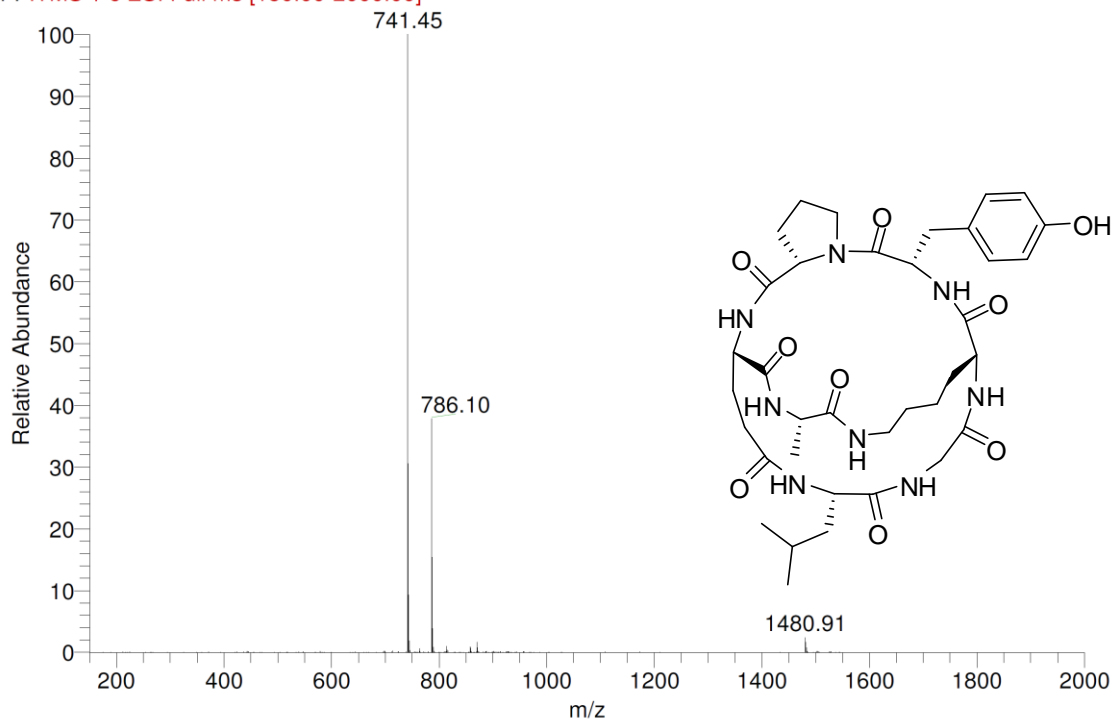

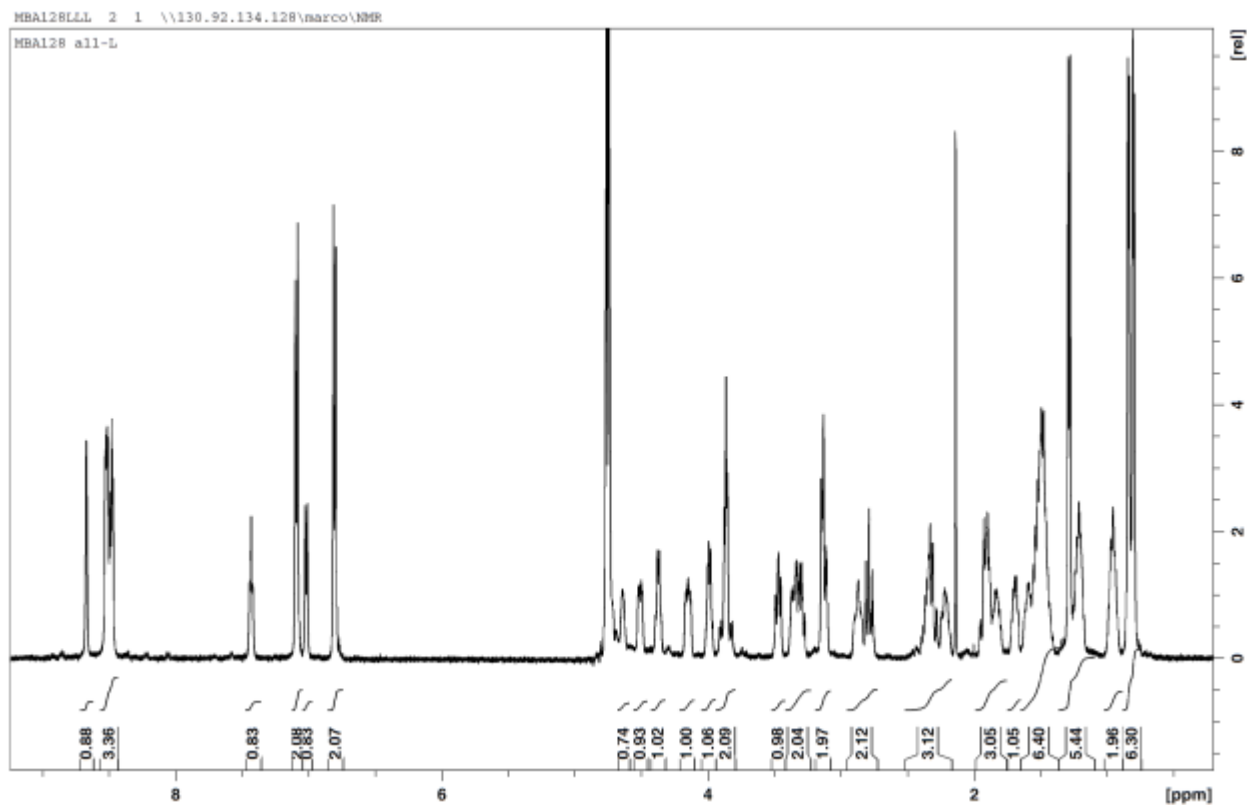
**<sup>1</sup>H-NMR (500 MHz, H<sub>2</sub>O/D<sub>2</sub>O 9:1)**

| residue          | proton                | $\delta$ (ppm) | $J$ (Hz)                                |
|------------------|-----------------------|----------------|-----------------------------------------|
| Leu <sup>1</sup> | NH                    | 8.52           | $^3J(\text{NH}-\alpha\text{CH}) = 3.50$ |
|                  | $\alpha\text{CH}$     | 4.37           |                                         |
|                  | $\beta\text{CH}_2$    | 1.50           |                                         |
|                  | $\gamma\text{CH}$     |                |                                         |
|                  | $\delta'\text{CH}_3$  | 0.84           |                                         |
|                  | $\delta''\text{CH}_3$ | 0.80           |                                         |
| Gly <sup>2</sup> | NH                    | 8.49           |                                         |
|                  | $\alpha\text{CH}_2$   | 3.86           |                                         |
| lys <sup>3</sup> | $\alpha\text{NH}$     | 7.02           | $^3J(\text{NH}-\alpha\text{CH}) = 7.45$ |
|                  | $\alpha\text{CH}$     | 4.64           |                                         |
|                  | $\beta'\text{CH}$     |                |                                         |
|                  | $\beta''\text{CH}$    |                |                                         |
|                  | $\gamma\text{CH}_2$   |                |                                         |
|                  | $\delta'\text{CH}$    |                |                                         |
|                  | $\delta''\text{CH}$   |                |                                         |
|                  | $\epsilon'\text{CH}$  | 3.35           |                                         |
|                  | $\epsilon''\text{CH}$ | 2.87           |                                         |
| Tyr <sup>4</sup> | $\epsilon\text{NH}$   | 7.43           |                                         |
|                  | NH                    | 8.67           |                                         |
|                  | $\alpha\text{CH}$     | 4.51           |                                         |
|                  | $\beta'\text{CH}$     | 3.12           |                                         |
|                  | $\beta''\text{CH}$    | 2.79           |                                         |
|                  | 2,6H                  | 7.09           |                                         |
|                  | 3,5H                  | 6.81           |                                         |

|                  |                     |      |                                         |
|------------------|---------------------|------|-----------------------------------------|
| Pro <sup>5</sup> | $\alpha\text{CH}$   | 3.14 |                                         |
|                  | $\beta'\text{CH}$   |      |                                         |
|                  | $\beta''\text{CH}$  |      |                                         |
|                  | $\gamma'\text{CH}$  |      |                                         |
|                  | $\gamma''\text{CH}$ |      |                                         |
|                  | $\delta'\text{CH}$  | 3.47 |                                         |
| Glu <sup>6</sup> | $\delta''\text{CH}$ | 3.30 | $^3J(\text{NH}-\alpha\text{CH}) = 2.57$ |
|                  | NH                  | 8.53 |                                         |
|                  | $\alpha\text{CH}$   | 4.15 |                                         |
|                  | $\beta'\text{CH}$   |      |                                         |
| Ala <sup>7</sup> | $\beta''\text{CH}$  |      | $^3J(\text{NH}-\alpha\text{CH}) = 4.32$ |
|                  | $\gamma\text{CH}_2$ |      |                                         |
|                  | NH                  | 8.48 |                                         |
|                  | $\alpha\text{CH}$   | 3.99 |                                         |
|                  | $\beta\text{CH}_3$  | 1.28 |                                         |

**L<sup>1</sup>GK<sup>2</sup>YPE<sup>1</sup>A<sup>2</sup> (18).**\\130.92.134.128\marco\...MBA128all\_f5  
10min

12.11.2013 15:00:20

RT: 0.00 - 10.00

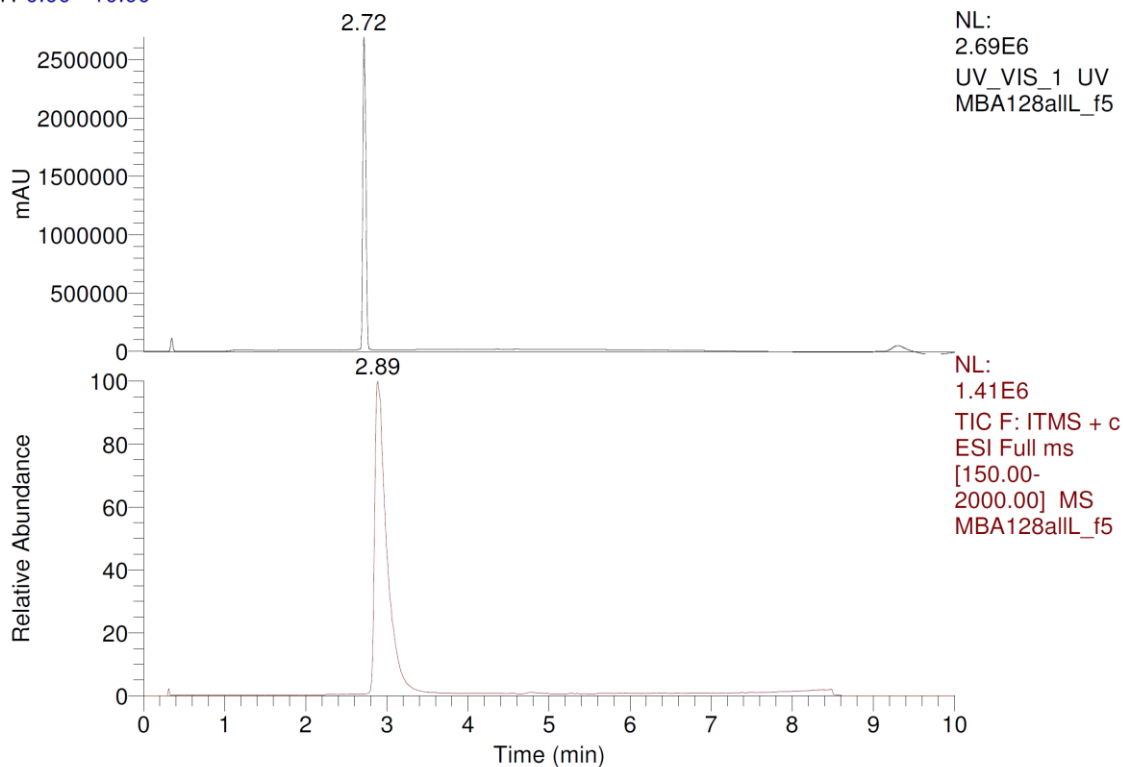

MBA128all\_f5 #148-189 RT: 2.80-3.30 AV: 42 NL: 2.16E5

F: ITMS + c ESI Full ms [150.00-2000.00]

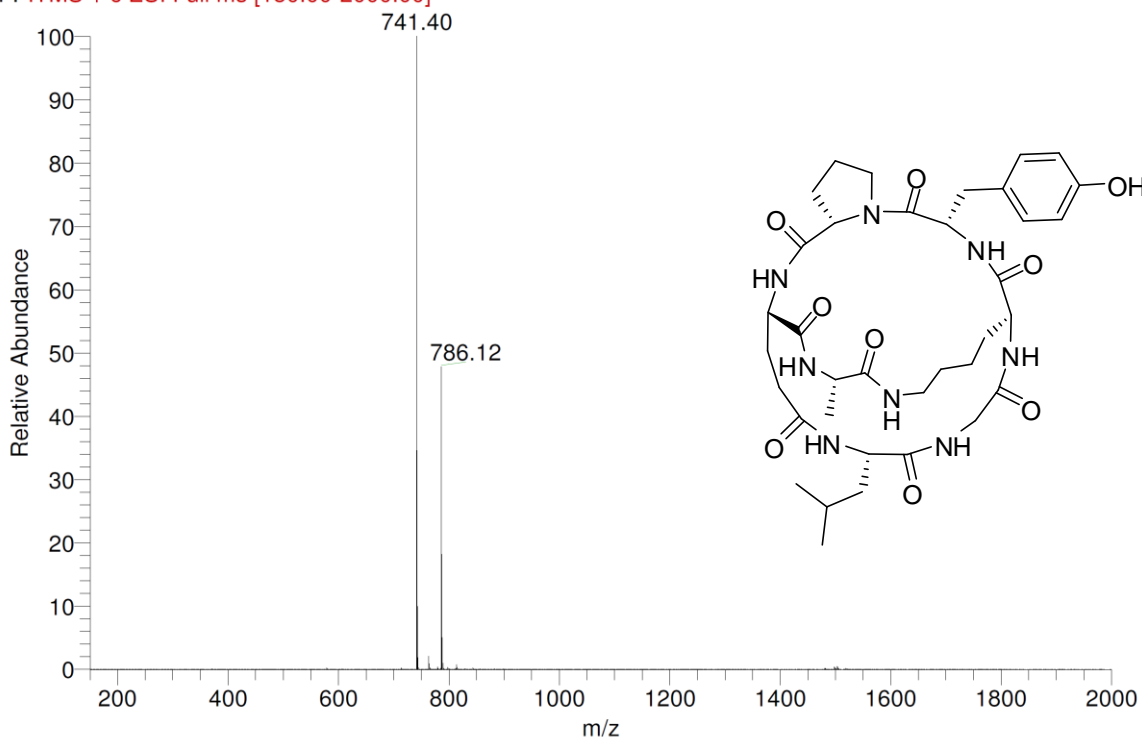

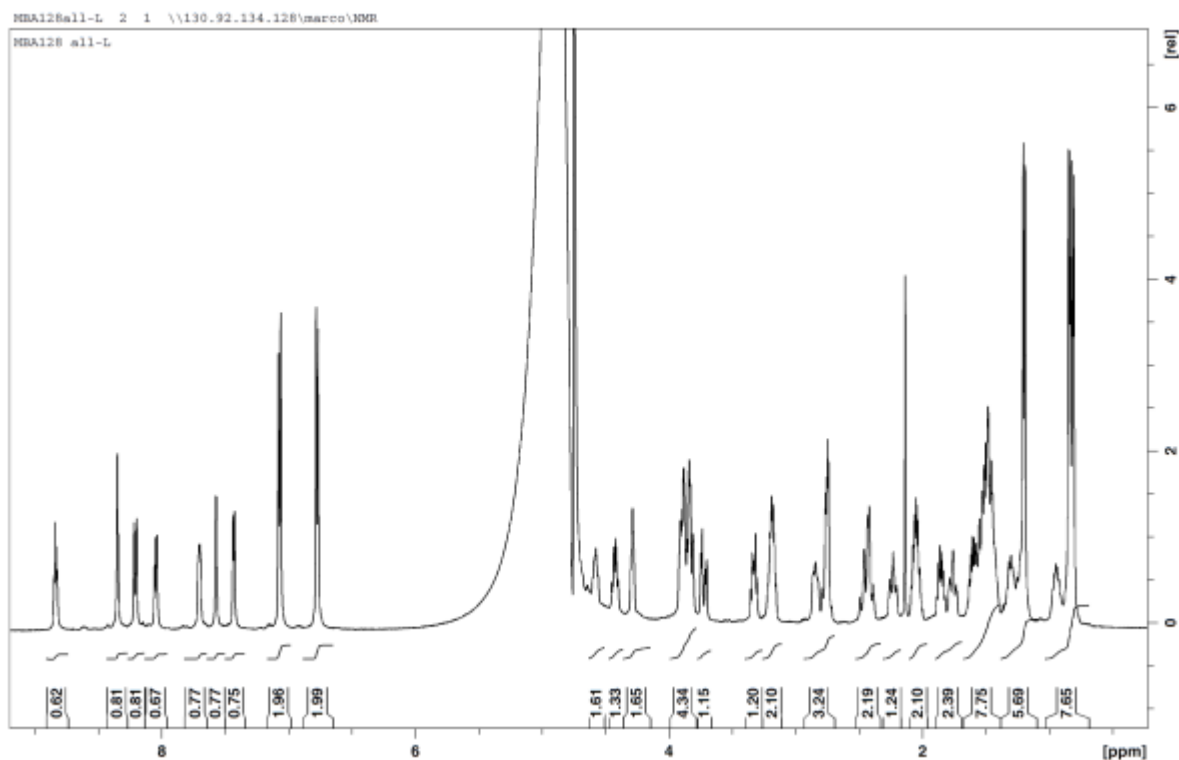

| <b><sup>1</sup>H-NMR (500 MHz, 90% H<sub>2</sub>O/D<sub>2</sub>O)</b> |                       |                |                                         |
|-----------------------------------------------------------------------|-----------------------|----------------|-----------------------------------------|
| <i>residue</i>                                                        | <i>proton</i>         | $\delta$ (ppm) | <i>J</i> (Hz)                           |
| Leu <sup>1</sup>                                                      | NH                    | 8.05           | $^3J(\text{NH}-\alpha\text{CH}) = 8.15$ |
|                                                                       | $\alpha\text{CH}$     | 4.57           |                                         |
|                                                                       | $\beta\text{CH}_2$    | 1.51           |                                         |
|                                                                       | $\gamma\text{CH}$     | 1.52           |                                         |
|                                                                       | $\delta'\text{CH}_3$  | 0.84           |                                         |
| Gly <sup>2</sup>                                                      | $\delta''\text{CH}_3$ | 0.81           |                                         |
|                                                                       | NH                    | 8.84           |                                         |
|                                                                       | $\alpha'\text{CH}$    | 3.90           |                                         |
| Lys <sup>3</sup>                                                      | $\alpha''\text{CH}$   | 3.72           |                                         |
|                                                                       | $\alpha\text{NH}$     | 7.44           | $^3J(\text{NH}-\alpha\text{CH}) = 5.86$ |
|                                                                       | $\alpha\text{CH}$     | 4.29           |                                         |
|                                                                       | $\beta'\text{CH}$     | 2.06           |                                         |
|                                                                       | $\beta''\text{CH}$    | 1.48           |                                         |
|                                                                       | $\gamma'\text{CH}$    | 1.22           |                                         |
|                                                                       | $\gamma''\text{CH}$   | 0.94           |                                         |
|                                                                       | $\delta'\text{CH}$    | 1.43           |                                         |
|                                                                       | $\delta''\text{CH}$   | 1.30           |                                         |
|                                                                       | $\epsilon'\text{CH}$  | 3.20           |                                         |
| $\epsilon''\text{CH}$                                                 | 7.70                  |                |                                         |
| $\epsilon\text{NH}$                                                   | 7.70                  |                |                                         |

|                  |                     |      |                                         |
|------------------|---------------------|------|-----------------------------------------|
| Tyr <sup>4</sup> | NH                  | 8.21 | $^3J(\text{NH}-\alpha\text{CH}) = 9.45$ |
|                  | $\alpha\text{CH}$   | 4.43 |                                         |
|                  | $\beta\text{CH}_2$  | 2.75 |                                         |
|                  | 2,6H                | 7.07 |                                         |
| Pro <sup>5</sup> | 3,5H                | 6.78 |                                         |
|                  | $\alpha\text{CH}$   | 3.85 |                                         |
|                  | $\beta'\text{CH}$   | 2.05 |                                         |
|                  | $\beta''\text{CH}$  | 1.86 |                                         |
|                  | $\gamma'\text{CH}$  | 1.60 |                                         |
| Glu <sup>6</sup> | $\gamma''\text{CH}$ | 1.50 |                                         |
|                  | $\delta'\text{CH}$  | 3.33 |                                         |
|                  | $\delta''\text{CH}$ | 3.18 |                                         |
|                  | NH                  | 8.35 |                                         |
|                  | $\alpha\text{CH}$   | 3.82 |                                         |
|                  | $\beta'\text{CH}$   | 2.23 |                                         |
| Ala <sup>7</sup> | $\beta''\text{CH}$  | 1.76 |                                         |
|                  | $\gamma\text{CH}_2$ | 2.43 |                                         |
|                  | NH                  | 7.58 | $^3J(\text{NH}-\alpha\text{CH}) = 2.44$ |
|                  | $\alpha\text{CH}$   | 3.89 |                                         |
|                  | $\beta\text{CH}_3$  | 1.20 |                                         |



**k<sup>1</sup>Gk<sup>2</sup>fPE<sup>1</sup>a<sup>2</sup> (19).**

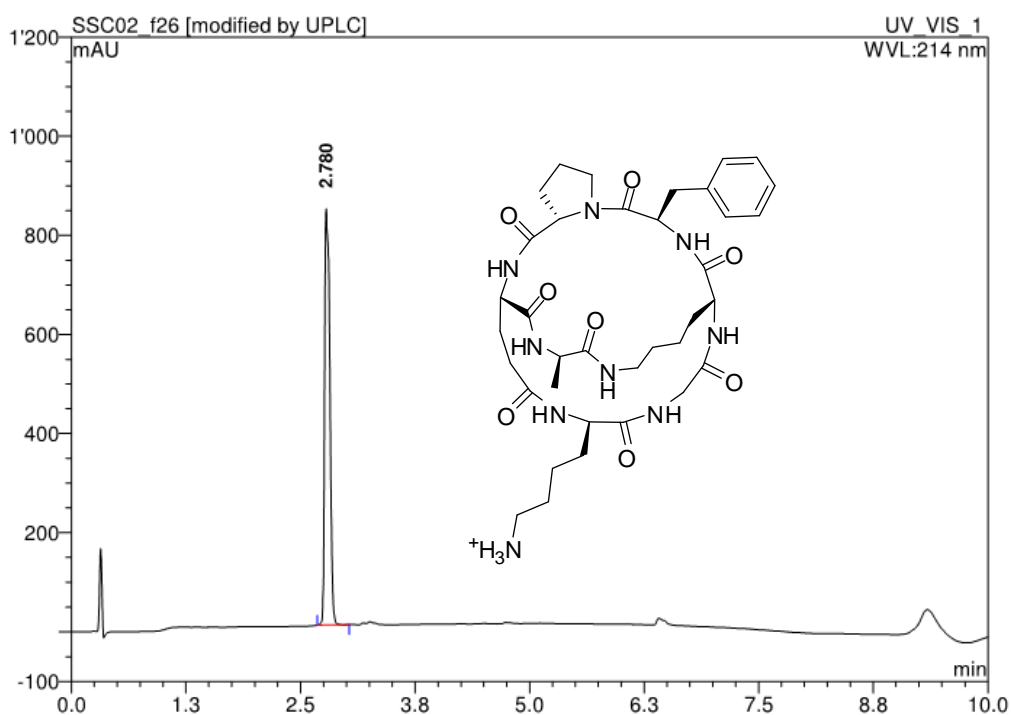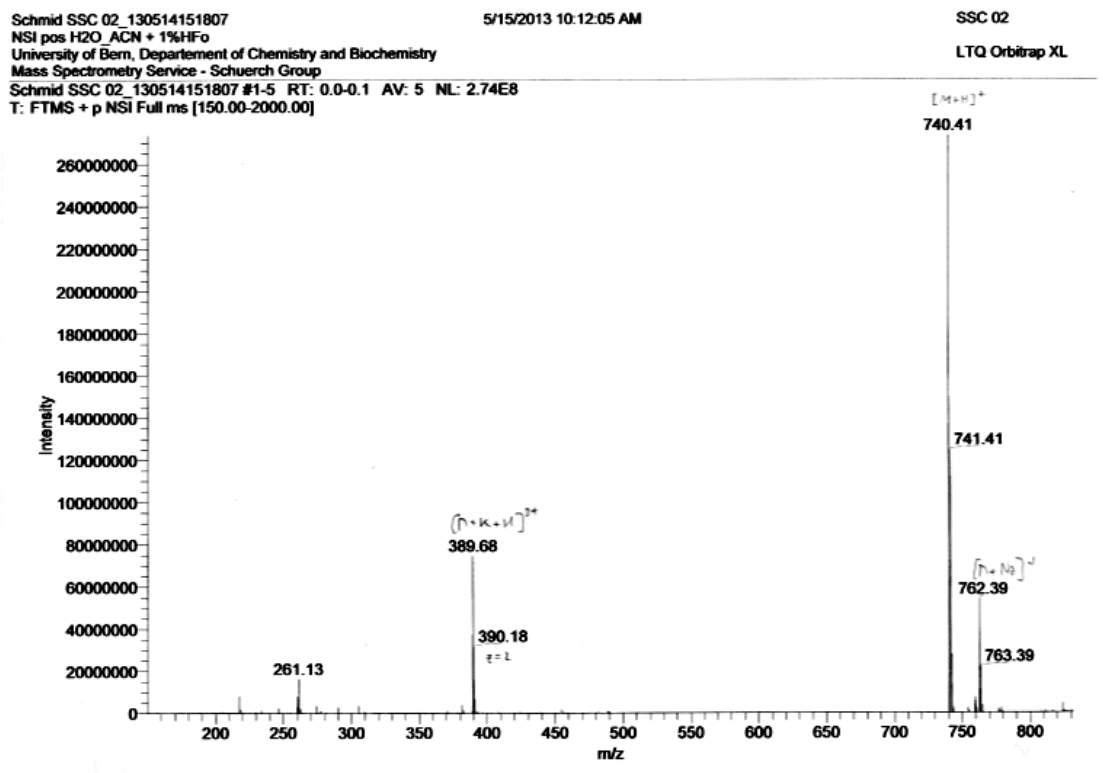

$1^1Sk^2fPE^1a^2$  (20).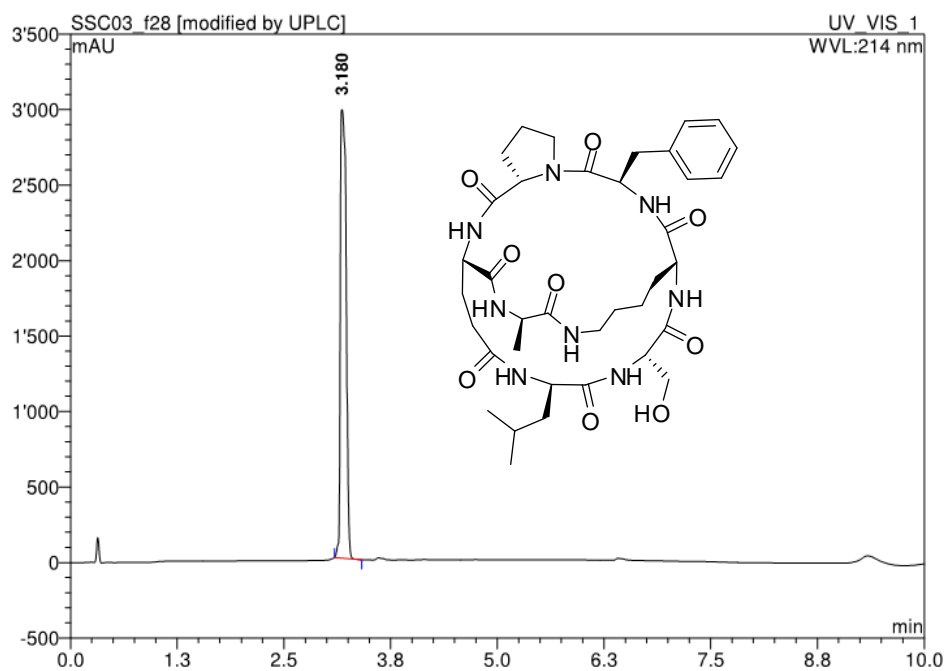

Schmid SSC 03\_130514151807 5/15/2013 10:15:26 AM SSC 03  
NSI pos H2O\_ACN + 1%HFo  
University of Bern, Department of Chemistry and Biochemistry  
Mass Spectrometry Service - Schuerch Group LTQ Orbitrap XL  
Schmid SSC 03\_130514151807 #1-5 RT: 0.0-0.1 AV: 5 NL: 2.73E8  
T: FTMS + p NSI Full ms [150.00-2000.00]

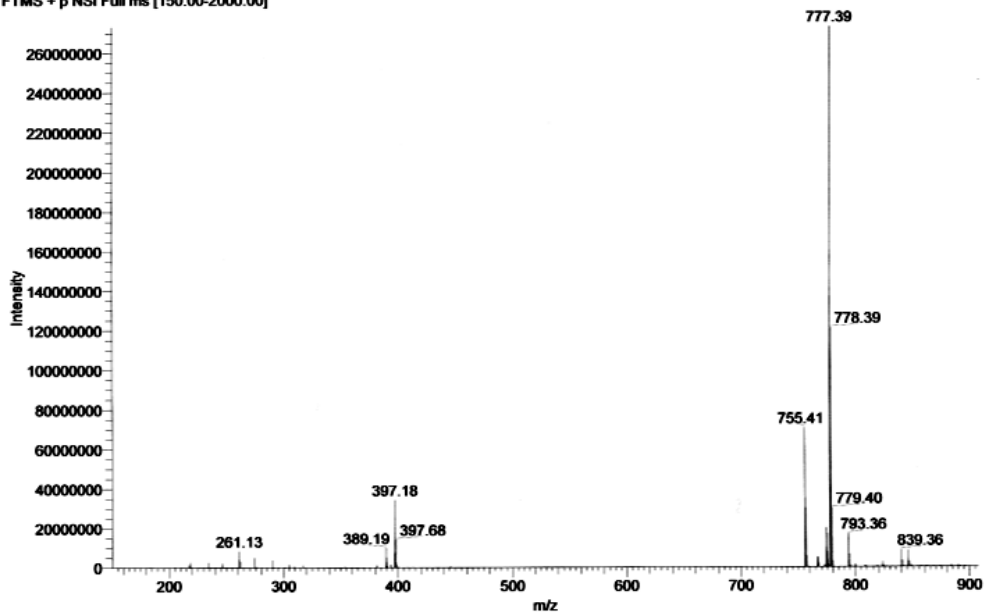

$1^1Gk^2fKE^1a^2$  (21).

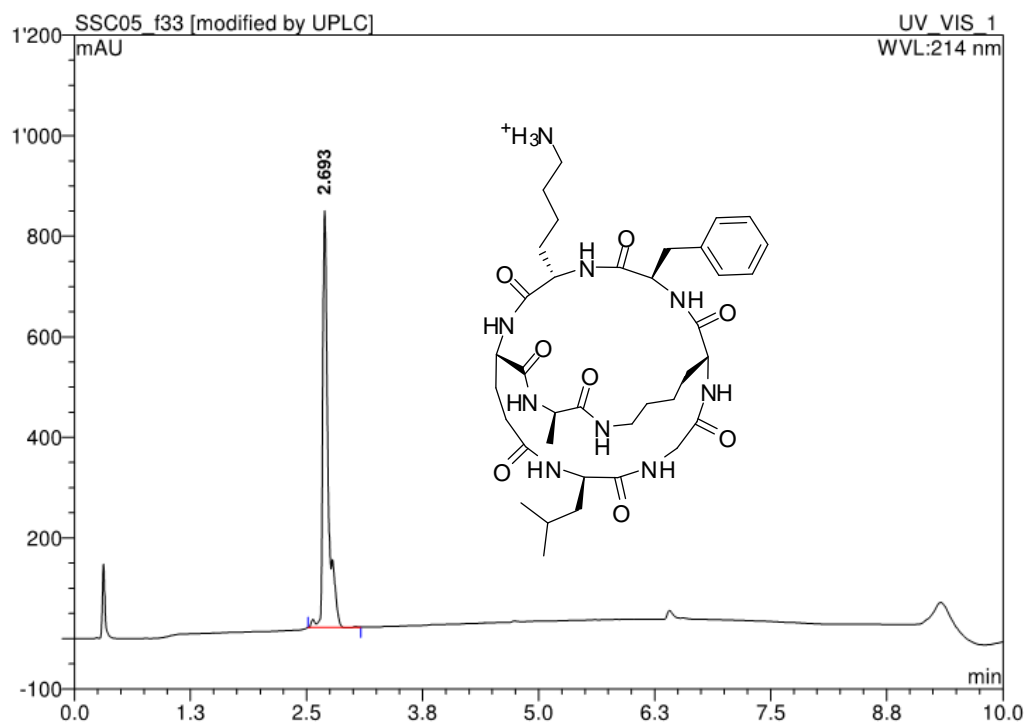

Schmid SSC 05\_130514151807 5/15/2013 10:21:38 AM SSC 05  
 NSI pos H<sub>2</sub>O ACN + 1%HFo LTQ Orbitrap XL  
 University of Bern, Department of Chemistry and Biochemistry  
 Mass Spectrometry Service - Schuerch Group  
 Schmid SSC 05\_130514151807 #1-11 RT: 0.0-0.3 AV: 11 NL: 9.62E8  
 T: FTMS + p NSI Full ms [150.00-2000.00]

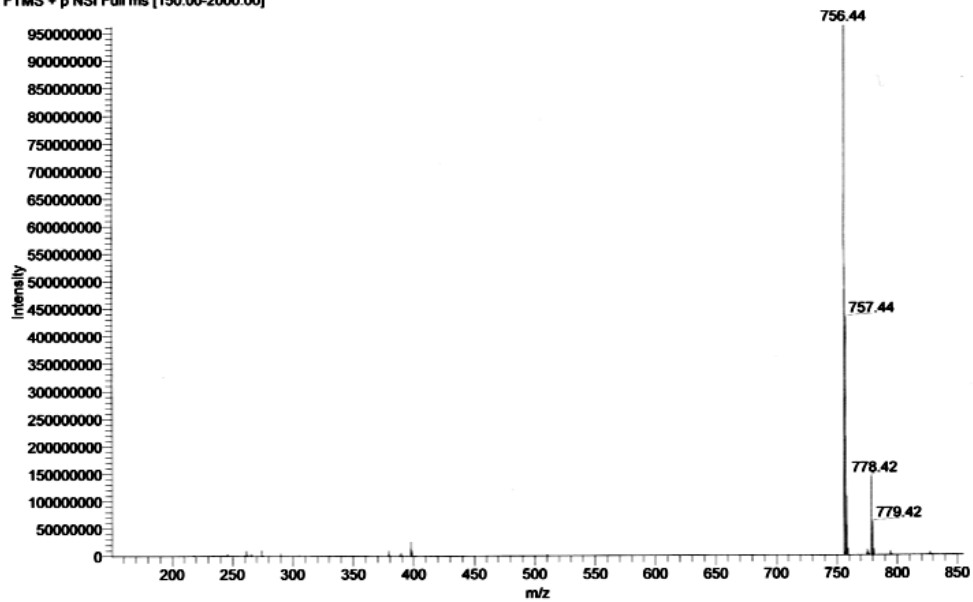

**k<sup>1</sup>Gk<sup>2</sup>ePE<sup>1</sup>c<sup>2</sup> (22)**. From 2CT-Cl resin (200 mg, 1.3 mmol/g), **22** was obtained as a white solid after preparative RP-HPLC (6.4 mg, 7.4  $\mu$ mol, 2.3%). Analytical RP-HPLC:  $t_R = 1.92$  min (A/D 100:0 to 0:100 in 7.5 min,  $\lambda = 214$  nm). MS (ESI+): C<sub>32</sub>H<sub>51</sub>N<sub>9</sub>O<sub>10</sub>S calc./obs. 754.36/754.35 [M+H]<sup>+</sup>, 776.34/776.34 [M+Na]<sup>+</sup>, 396.65/396.65 [M+K+H]<sup>2+</sup>.

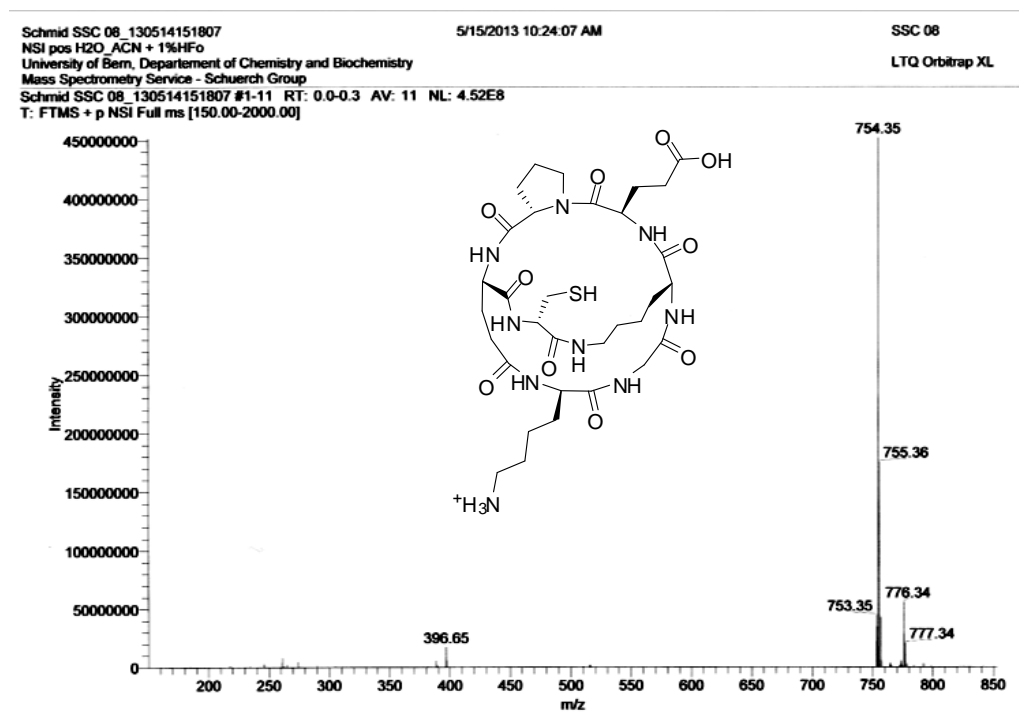

K<sup>1</sup>Gk<sup>2</sup>fPE<sup>1</sup>A<sup>2</sup> (23).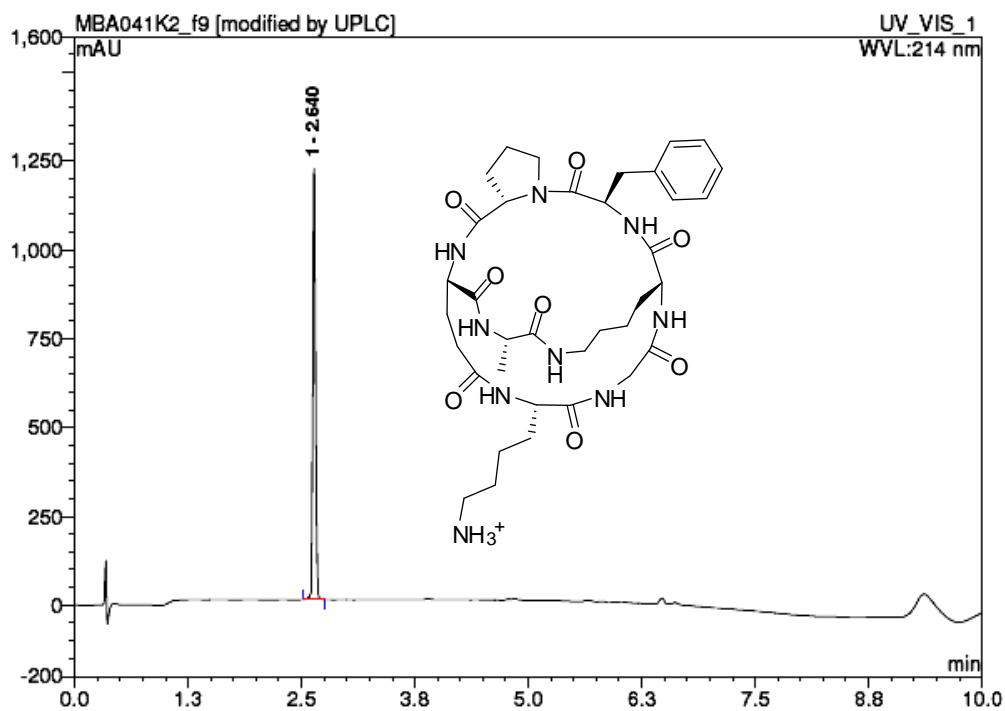

C:\Xcalibur\1\Bartoloni MBA 041K2

10/20/2011 9:05:40 AM

Bartoloni MBA 041K2

ESI pos ACN + 0.1%HFo

University of Bern, Department of Chemistry and Biochemistry

LTQ Orbitrap XL

Mass Spectrometry Service - Schuerch Group

Bartoloni MBA 041K2 #1-4 RT: 0.0-0.1 AV: 4 NL: 3.57E8

T: FTMS + p NSI Full ms [150.00-2000.00]

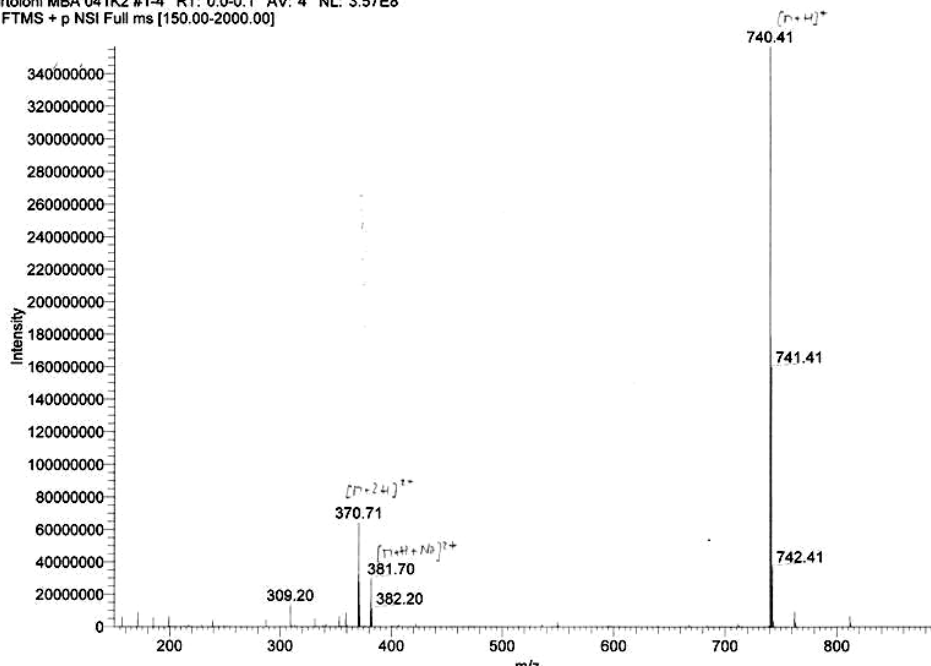

**L<sup>1</sup>Sk<sup>2</sup>fPE<sup>1</sup>A<sup>2</sup> (24).**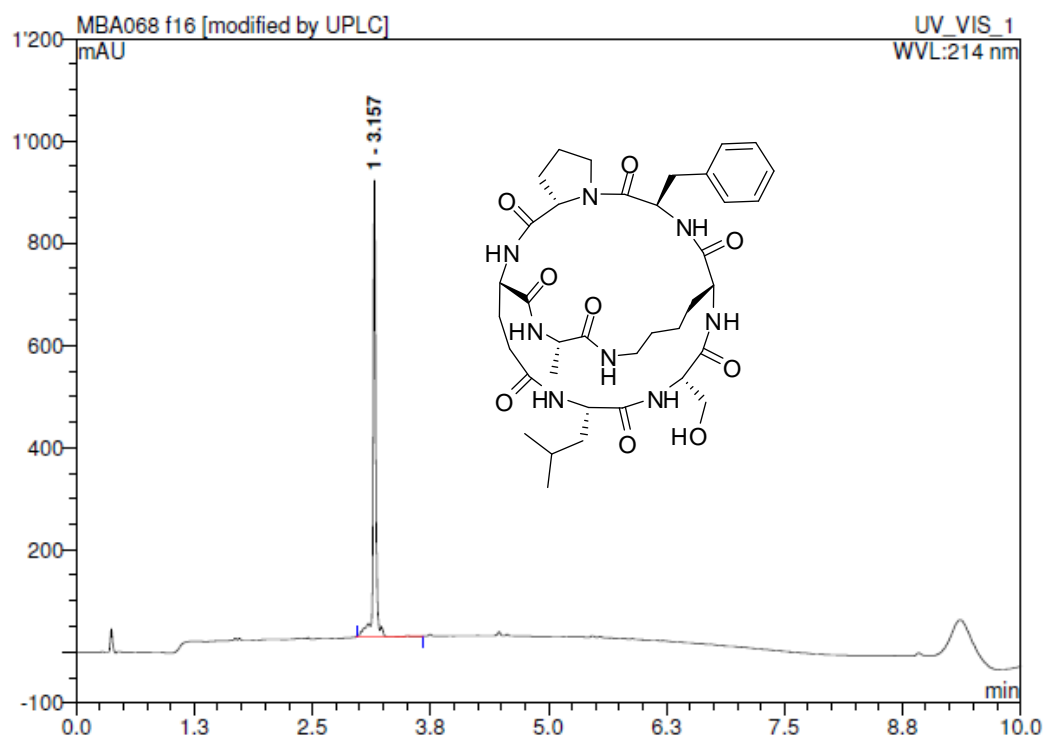

Bartoloni MBA 068\_120703140438

7/3/2012 2:27:05 PM

MBA 068

NSI pos ACN 1% H<sub>2</sub>O

Bartoloni MBA 068\_120703140438 #1-14 RT: 0.0-0.4 AV: 14 NL: 2.15E8

T: FTMS + p NSI Full ms [150.00-2000.00]

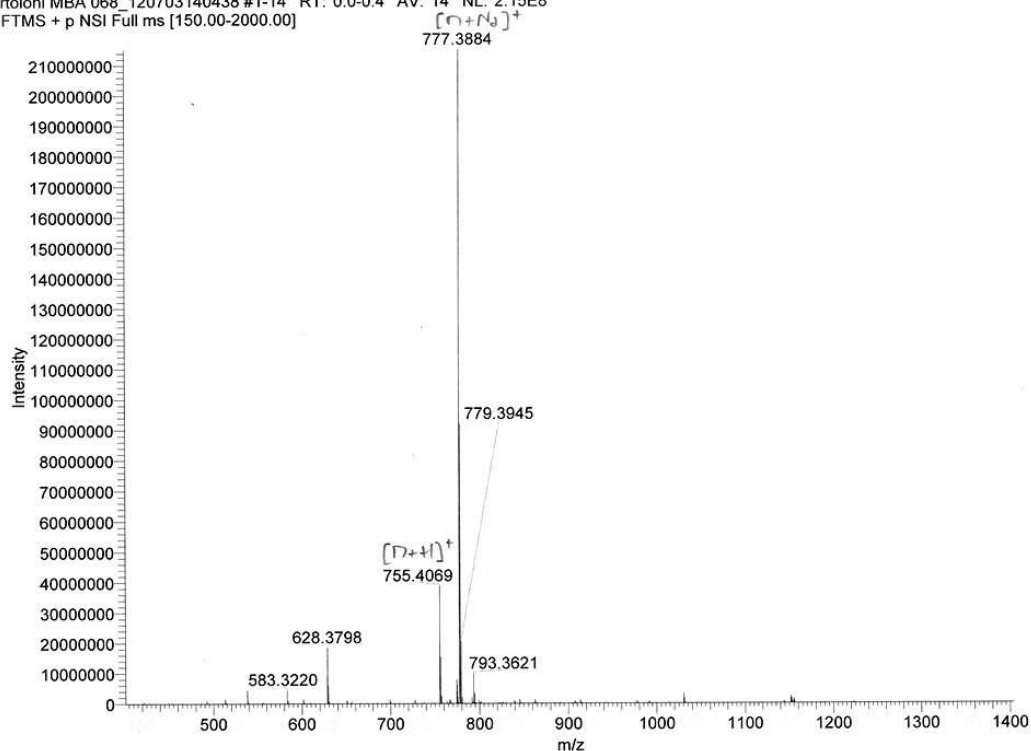

L<sup>1</sup>Gk<sup>2</sup>fKE<sup>1</sup>A<sup>2</sup> (25).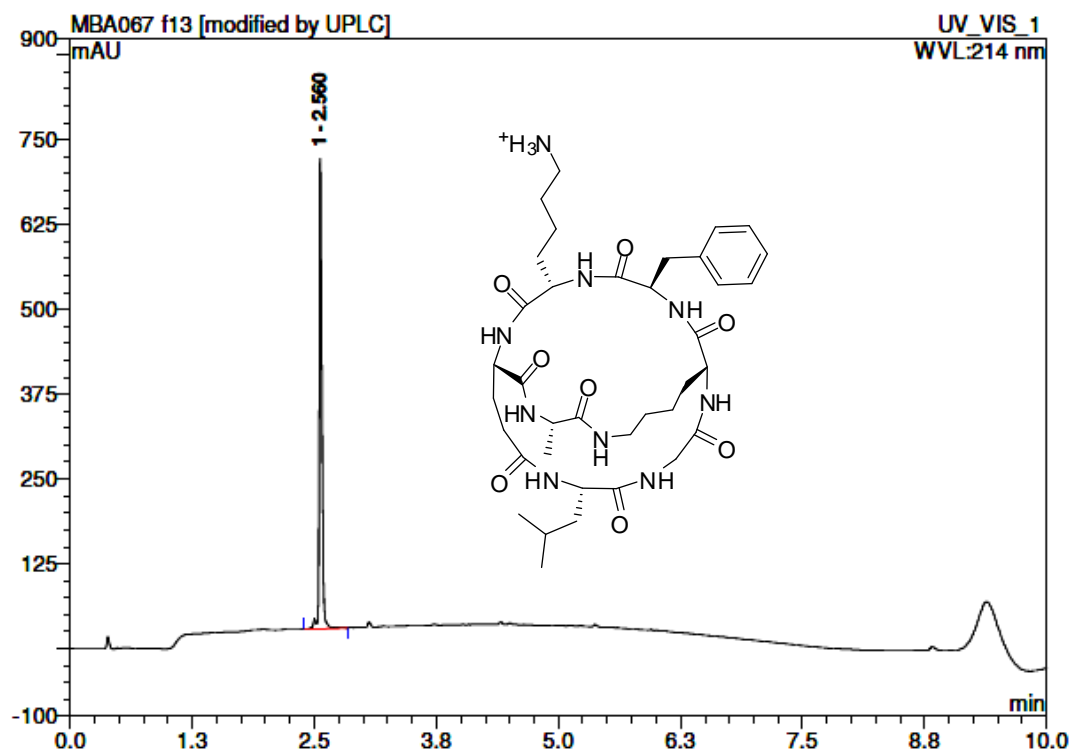

Bartoloni MBA 067\_120703140438  
NSI pos ACN 1% H<sub>2</sub>O

7/3/2012 2:23:48 PM

MBA 067

Bartoloni MBA 067\_120703140438 #8-23 RT: 0.2-0.6 AV: 16 NL: 3.10E8

T: FTMS + p NSI Full ms [150.00-2000.00]

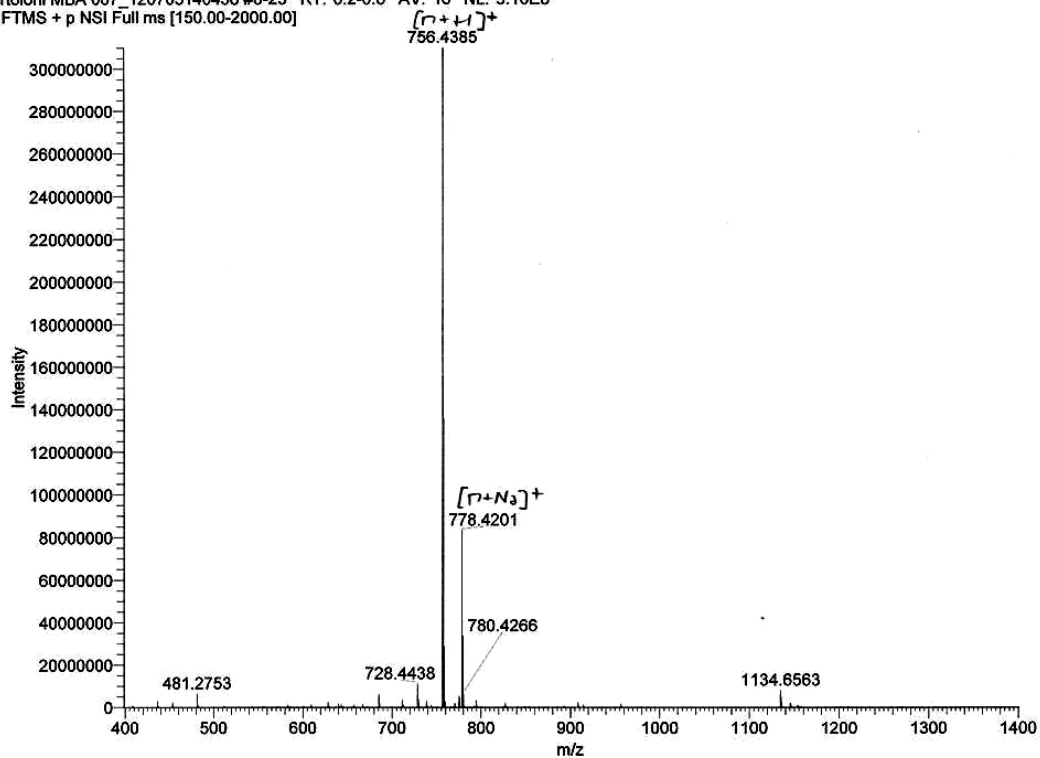

**K<sup>1</sup>Gk<sup>2</sup>ePE<sup>1</sup>C<sup>2</sup> (26).**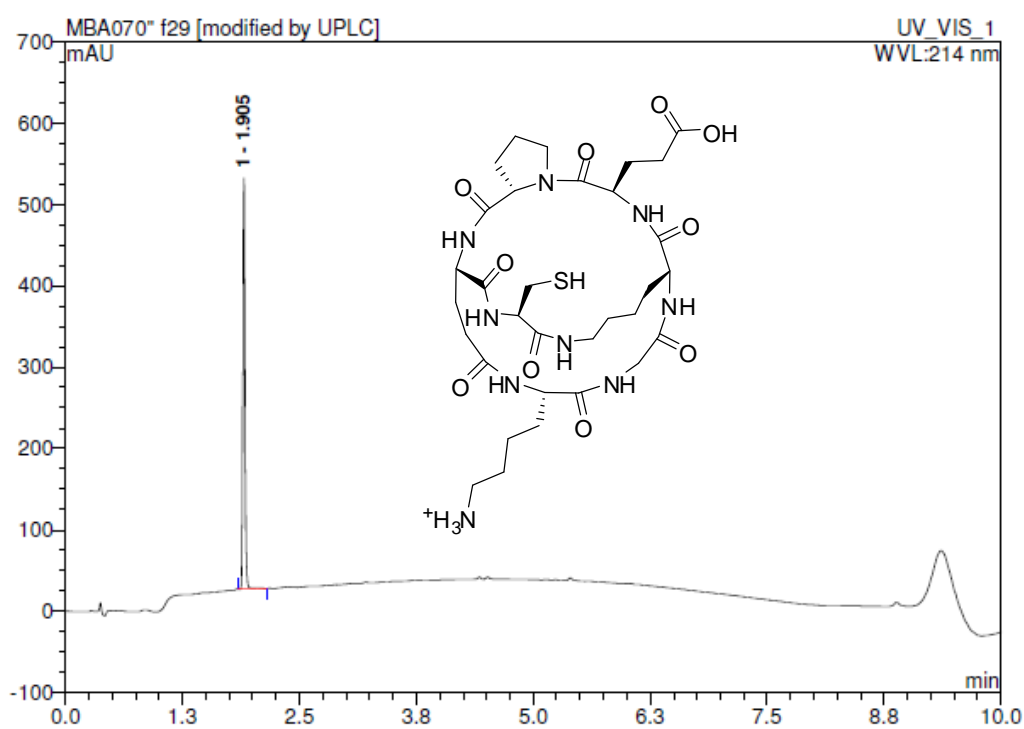

Bartoloni MBA070\_120704143358  
NSI pos ACN + 1%HFo

7/4/2012 3:15:52 PM

MBA070

Bartoloni MBA070\_120704143358 #1-14 RT: 0.0-0.4 AV: 14 NL: 7.37E7  
T: FTMS + p NSI Full ms [150.00-2000.00]

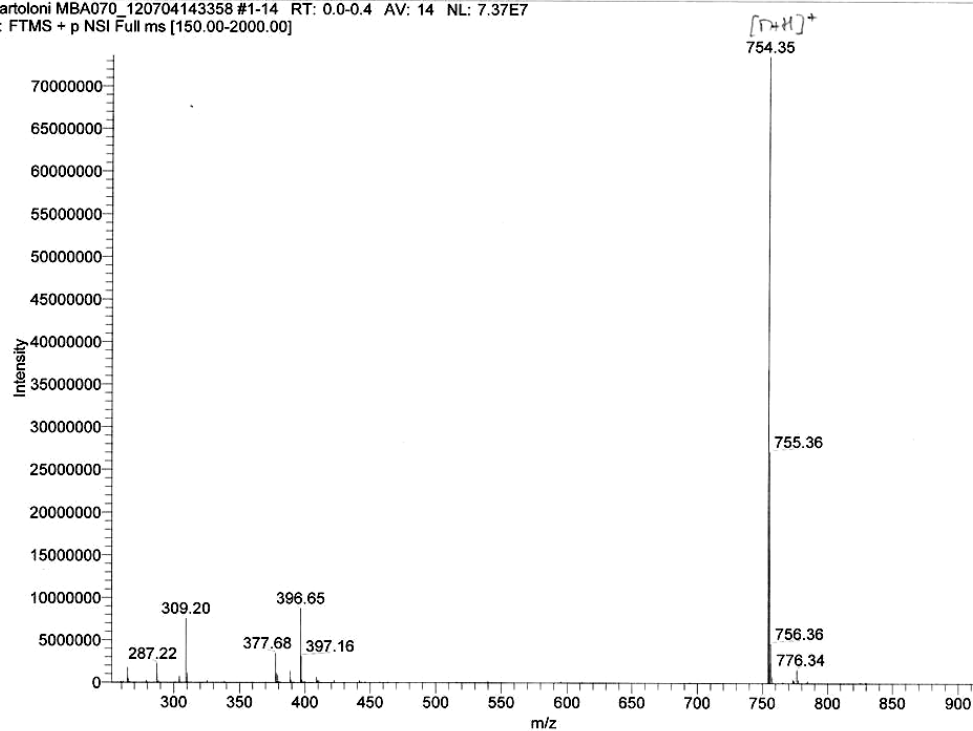



**K<sup>2</sup>E<sup>1</sup>Kwz<sup>2</sup>WK<sup>1</sup>GBGGK<sub>(biot)</sub> (27x).**\\130.92.134.128\marco\LCMS\MBA123\_f17  
10'

03.06.2013 12:03:45

RT: 0.00 - 10.00

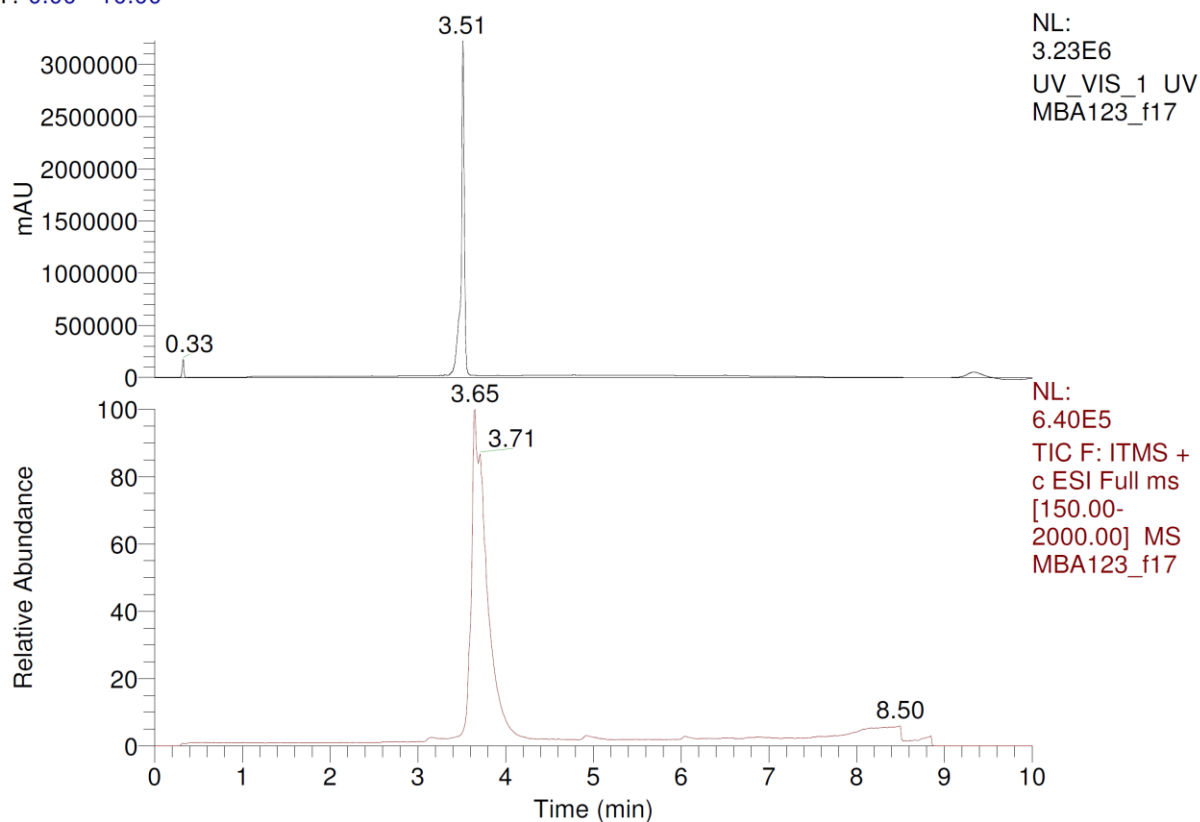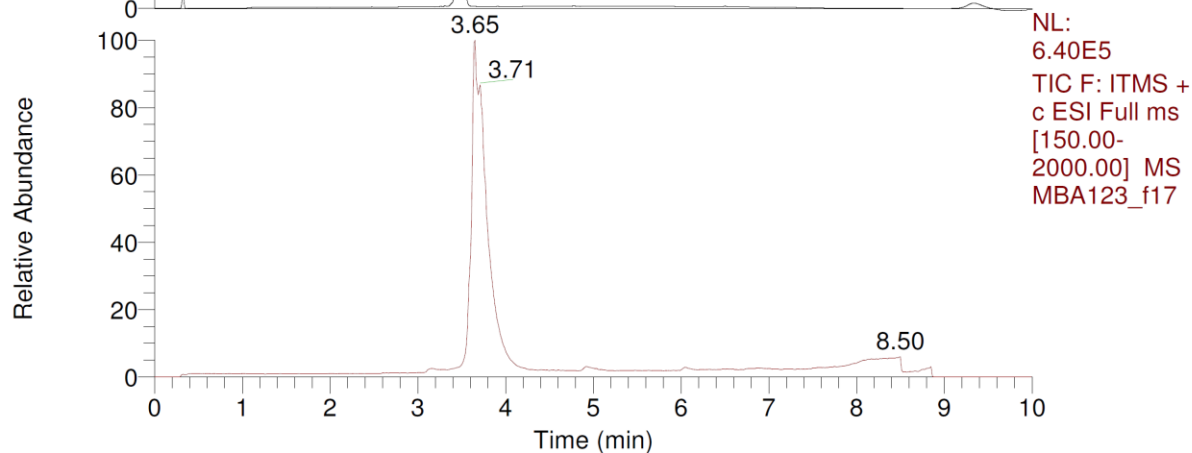

MBA123\_f17 #190-218 RT: 3.57-3.90 AV: 29 NL: 5.04E4

F: ITMS + c ESI Full ms [150.00-2000.00]

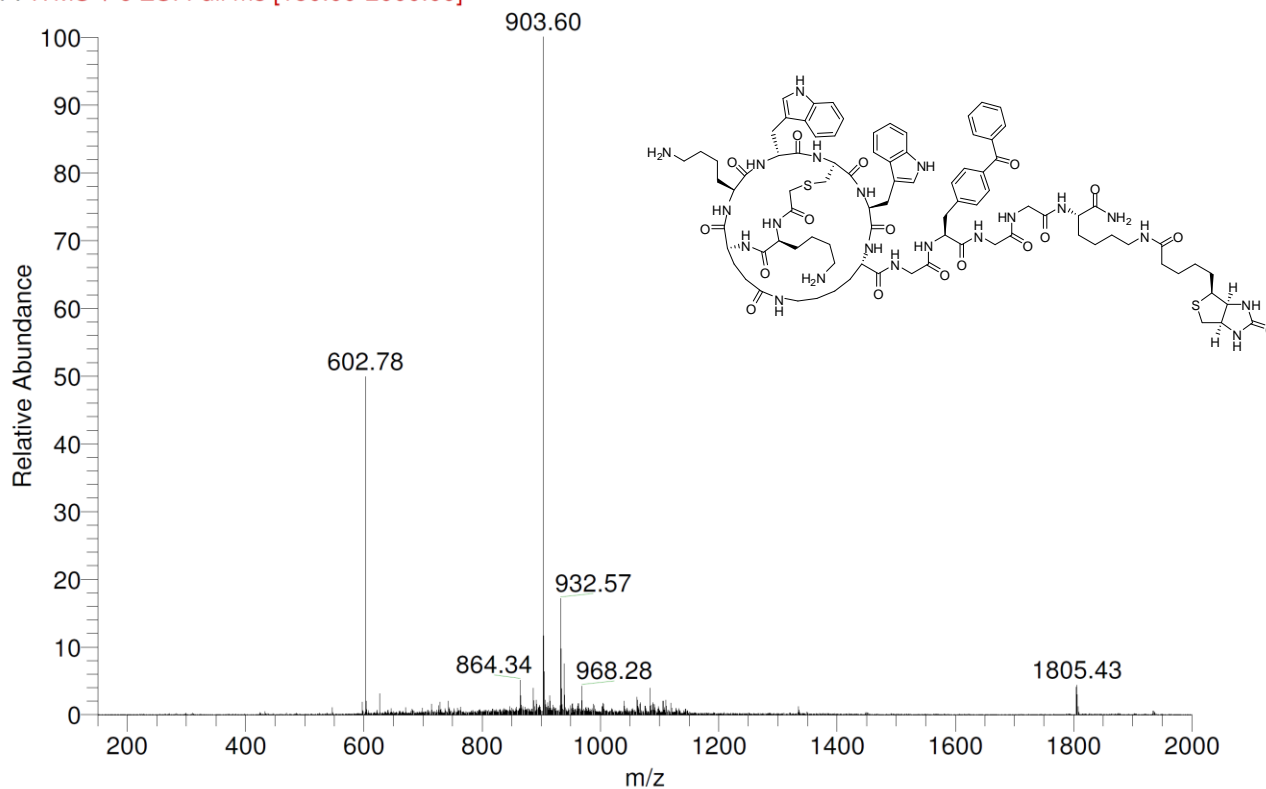

**K<sup>2</sup>E<sup>1</sup>Kwz<sup>2</sup>WK<sup>1</sup>GBGGK<sub>(biot)</sub> (27s).**\\130.92.134.128\marco\LCMS\MBA123B\_f19  
10'

03.06.2013 12:49:22

RT: 0.00 - 10.00

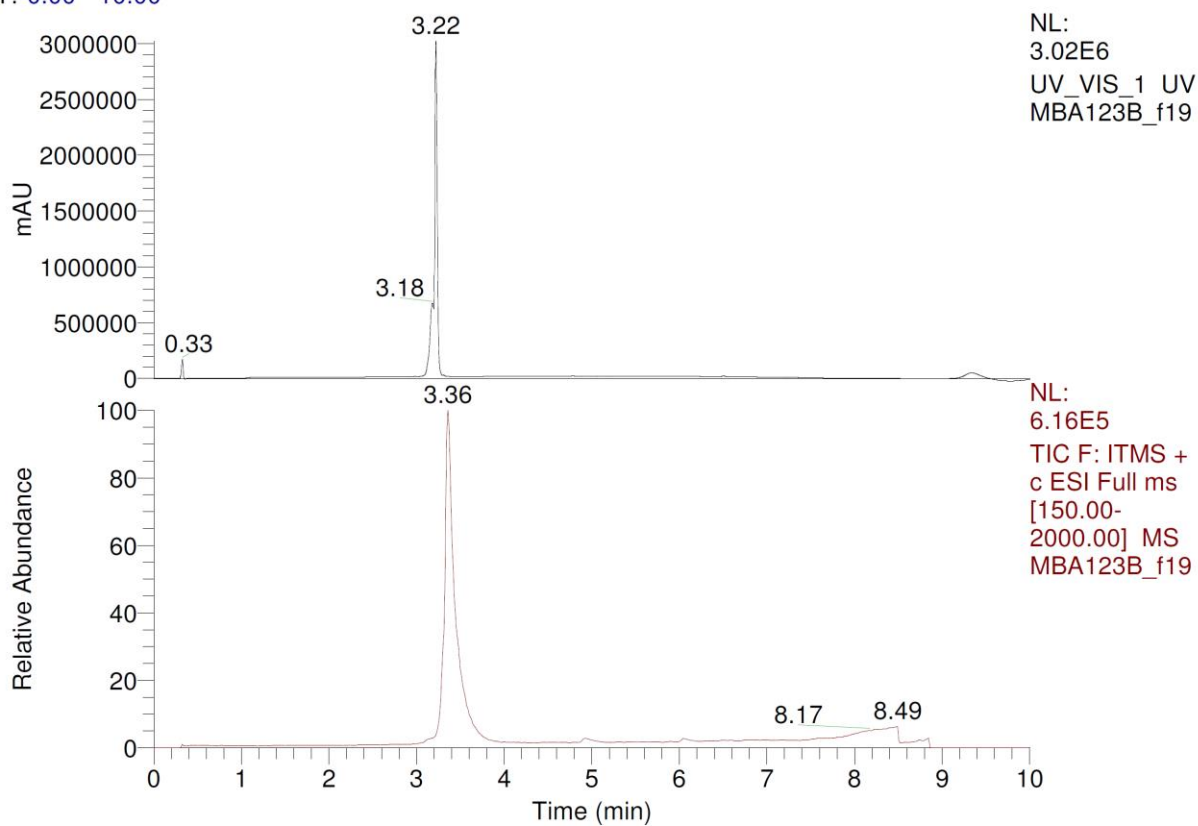MBA123B\_f19 #170-203 RT: 3.22-3.63 AV: 34 NL: 5.40E4  
F: ITMS + c ESI Full ms [150.00-2000.00]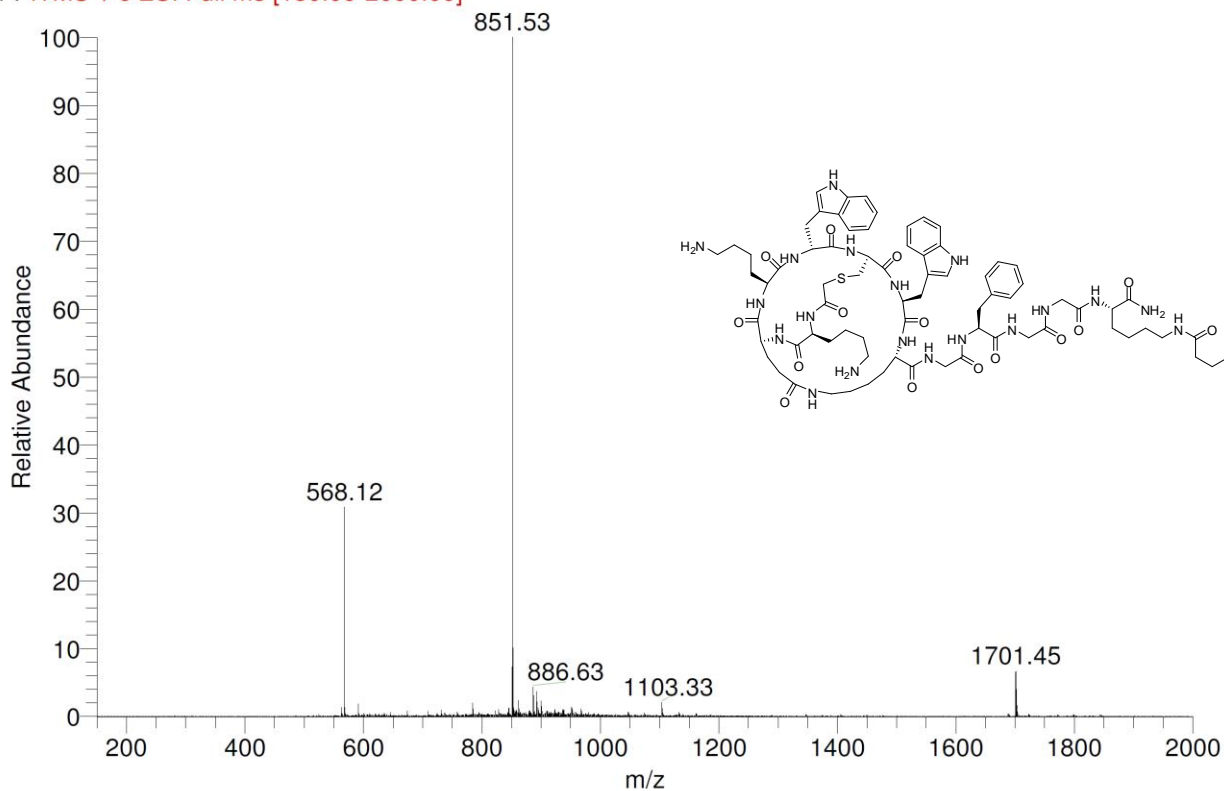

**K<sup>2</sup>E<sup>1</sup>Kwz<sup>2</sup>WK<sup>1</sup>G (27c).**

MBA123A\_f10+11

03.06.2013 14:06:07

10'

RT: 0.00 - 10.00

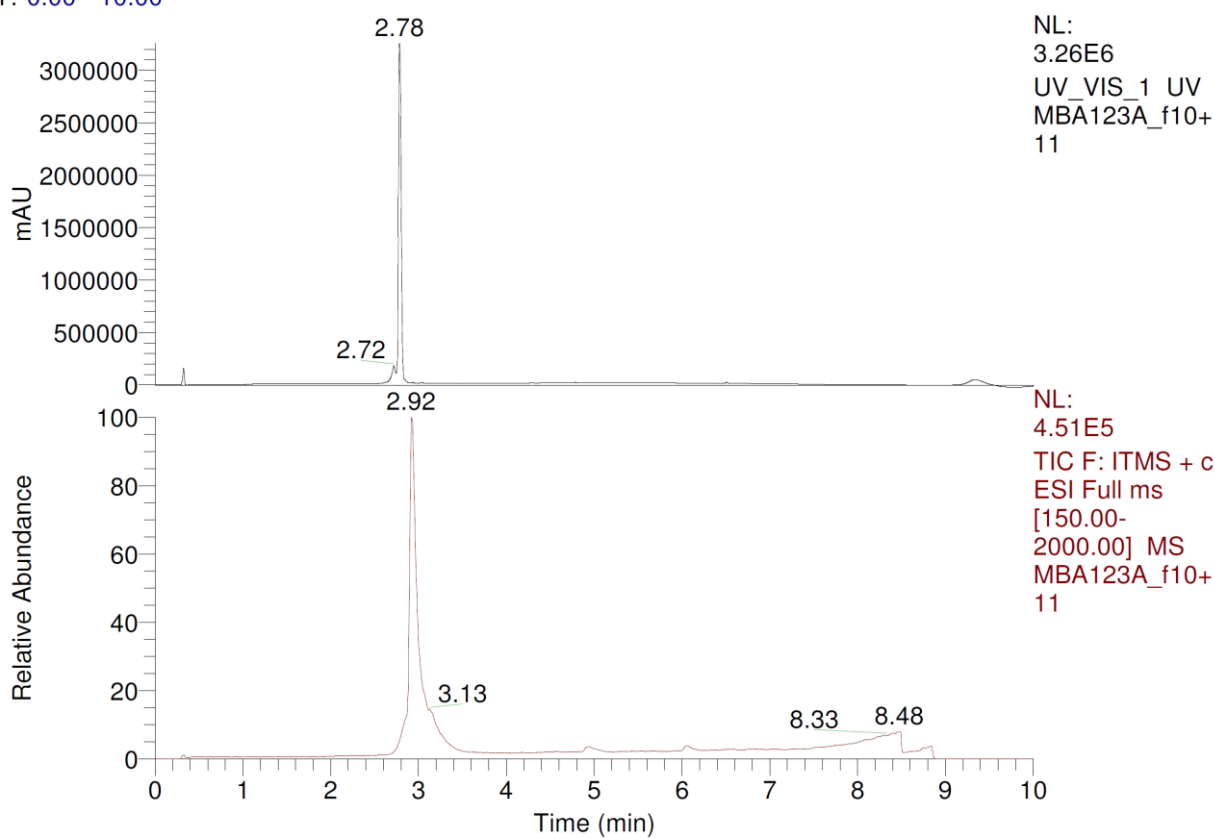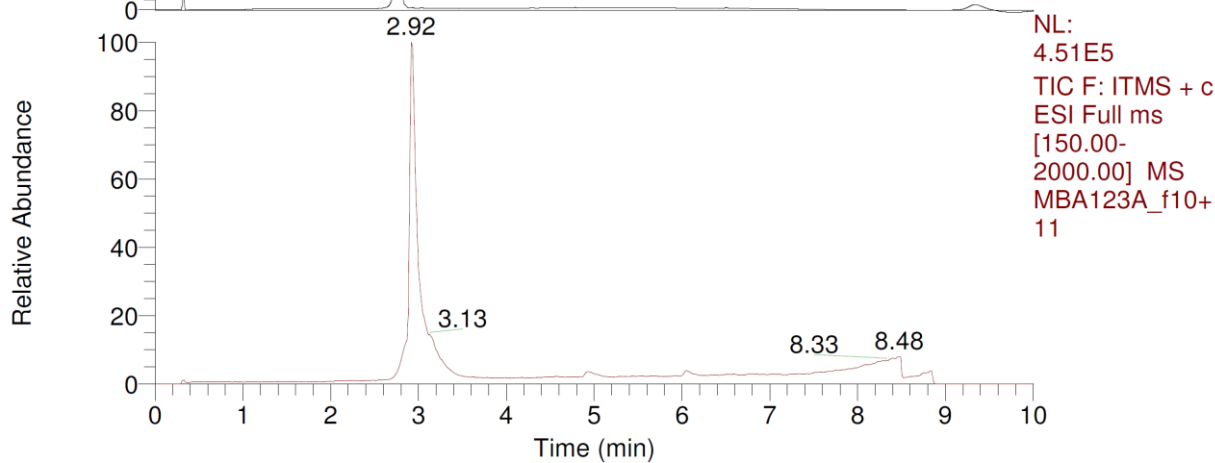

MBA123A\_f10+11 #150-168 RT: 2.83-3.05 AV: 19 NL: 5.33E4

F: ITMS + c ESI Full ms [150.00-2000.00]

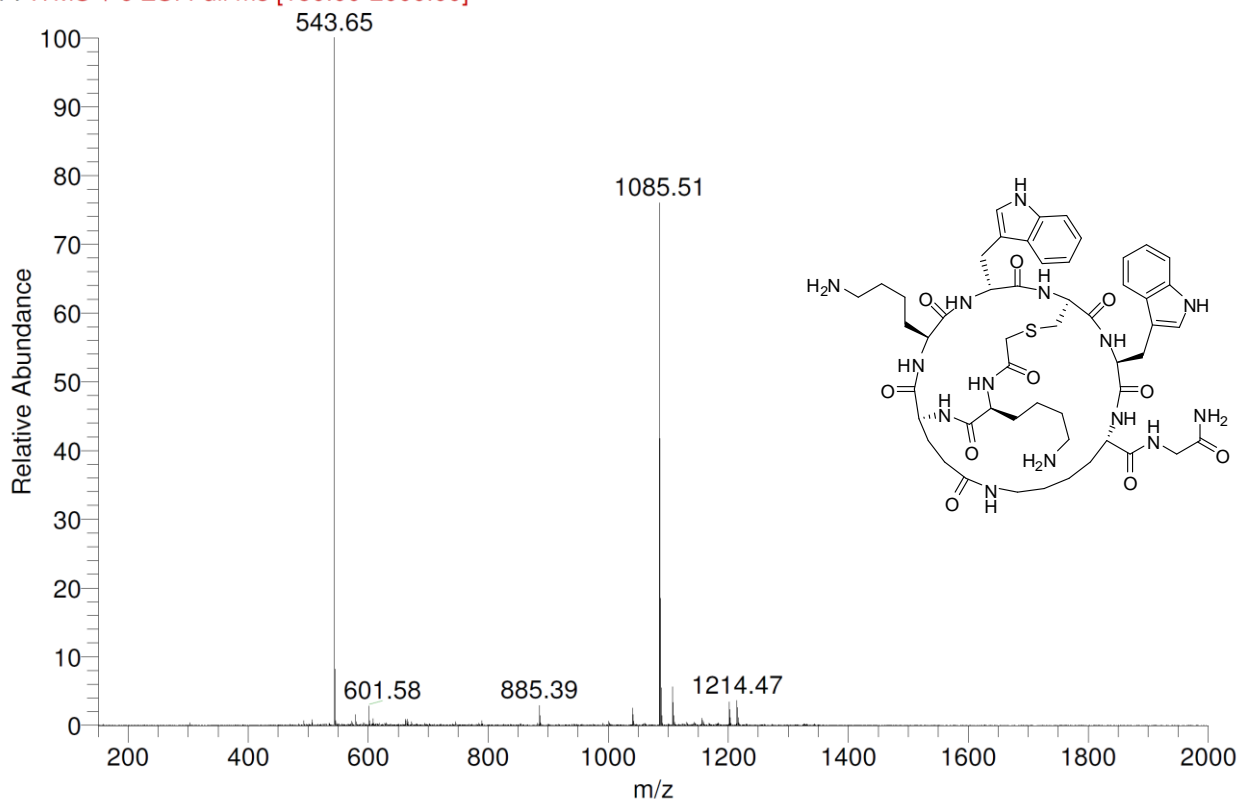

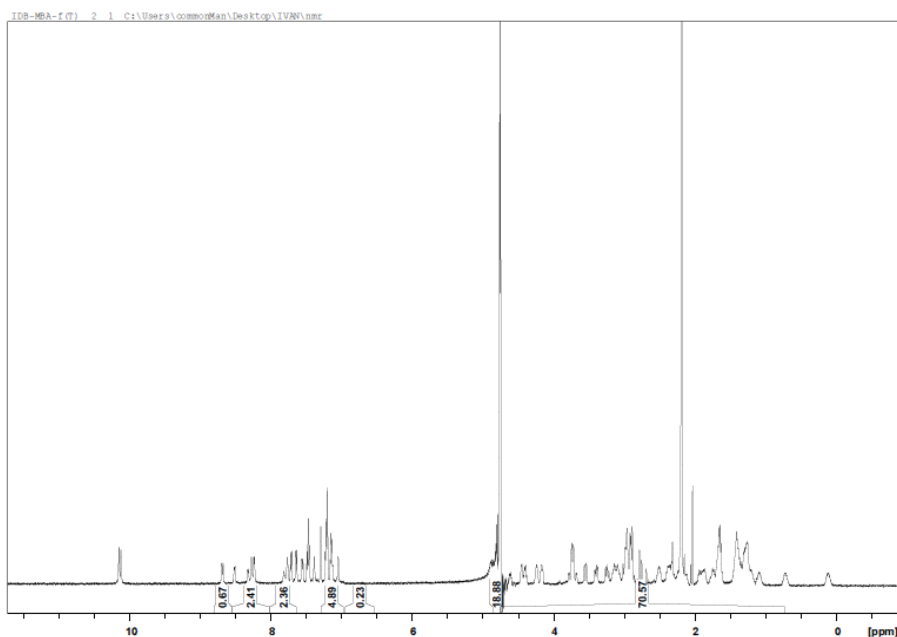

| <b><sup>1</sup>H-NMR (500 MHz, 90% H<sub>2</sub>O/D<sub>2</sub>O)</b> |                            |                |                                         |
|-----------------------------------------------------------------------|----------------------------|----------------|-----------------------------------------|
| <i>residue</i>                                                        | <i>proton</i>              | $\delta$ (ppm) | <i>J</i> (Hz)                           |
| Lys <sup>1</sup>                                                      | NH                         | 8.27           | $^3J(\text{NH}-\alpha\text{CH}) = 7.45$ |
|                                                                       | $\alpha$ CH                | 4.26           |                                         |
|                                                                       | $\beta'$ CH                | 0.90           |                                         |
|                                                                       | $\beta''$ CH               | 0.50           |                                         |
|                                                                       | $\gamma'$ CH               | 1.48           |                                         |
|                                                                       | $\gamma''$ CH              | 1.12           |                                         |
|                                                                       | $\delta'$ CH <sub>3</sub>  | 1.61           |                                         |
|                                                                       | $\delta''$ CH <sub>3</sub> | 1.60           |                                         |
|                                                                       | $\epsilon'$ CH             | 2.90           |                                         |
|                                                                       | $\epsilon''$ CH            | 2.82           |                                         |
|                                                                       | $\epsilon$ NH              | 7.70           |                                         |
| Glu <sup>2</sup>                                                      | NH                         | 8.29           | $^3J(\text{NH}-\alpha\text{CH}) = 7.57$ |
|                                                                       | $\alpha$ CH                | 4.18           |                                         |
|                                                                       | $\beta'$ CH                | 1.21           |                                         |
|                                                                       | $\beta''$ CH               | 1.23           |                                         |
|                                                                       | $\gamma'$ CH               | 1.91           |                                         |
| Lys <sup>3</sup>                                                      | $\gamma''$ CH              | 1.83           |                                         |
|                                                                       | $\alpha$ NH                | 7.65           | $^3J(\text{NH}-\alpha\text{CH}) = 7.38$ |
|                                                                       | $\alpha$ CH                | 4.45           |                                         |
|                                                                       | $\beta'$ CH                | 1.59           |                                         |
|                                                                       | $\beta''$ CH               | 1.57           |                                         |
|                                                                       | $\gamma'$ CH               | 1.12           |                                         |
|                                                                       | $\gamma''$ CH              | 1.14           |                                         |
|                                                                       | $\delta'$ CH               | 2.98           |                                         |
|                                                                       | $\delta''$ CH              | 2.96           |                                         |
|                                                                       | $\epsilon'$ CH             | 3.15           |                                         |
| $\epsilon''$ CH                                                       | 3.12                       |                |                                         |
| Trp <sup>4</sup>                                                      | $\epsilon$ NH              | 7.12           |                                         |
|                                                                       | NH                         | 8.49           |                                         |
|                                                                       | $\alpha$ CH                | 4.23           |                                         |
|                                                                       | $\beta'$ CH                | 3.16           |                                         |
|                                                                       | $\beta''$ CH               | 3.12           |                                         |
|                                                                       | $\delta$ CH                | 7.73           |                                         |
| cys <sup>5</sup>                                                      | $\epsilon'$ CH             | 10.19          |                                         |
|                                                                       | $\epsilon''$ CH            | 7.65           | $^3J(\text{NH}-\alpha\text{CH}) = 7.98$ |
|                                                                       | $z'$ CH                    | 7.31           |                                         |

|                  |                |       |                                         |
|------------------|----------------|-------|-----------------------------------------|
| $z''$ CH         | 7.21           |       |                                         |
| $h'$ CH          | 7.07           |       |                                         |
| NH               | 8.62           |       |                                         |
| $\alpha$ CH      | 5.05           |       |                                         |
| $\beta'$ CH      | 3.88           |       |                                         |
| $\beta''$ CH     | 3.71           |       |                                         |
| $\delta'$ CH     | 3.18           |       |                                         |
| Trp <sup>6</sup> | NH             | 7.68  |                                         |
|                  | $\alpha$ CH    | 4.68  |                                         |
|                  | $\beta'$ CH    | 2.90  |                                         |
|                  | $\beta''$ CH   | 2.85  |                                         |
|                  | $\delta$ CH    | 6.98  |                                         |
|                  | $\epsilon'$ CH | 10.19 |                                         |
| $\epsilon''$ CH  | 7.65           |       |                                         |
| $z'$ CH          | 7.31           |       |                                         |
| $z''$ CH         | 7.21           |       |                                         |
| Lys <sup>7</sup> | $h'$ CH        | 7.07  |                                         |
|                  | NH             | 8.32  | $^3J(\text{NH}-\alpha\text{CH}) = 7.07$ |
|                  | $\alpha$ CH    | 4.15  |                                         |
|                  | $\beta'$ CH    | 2.39  |                                         |
|                  | $\beta''$ CH   | 2.37  |                                         |
|                  | $\gamma'$ CH   | 1.96  |                                         |
|                  | $\gamma''$ CH  | 1.98  |                                         |
|                  | $\delta'$ CH   | 2.15  |                                         |
|                  | $\delta''$ CH  | 2.22  |                                         |
|                  | $\epsilon'$ CH | 3.22  |                                         |
| $\epsilon''$ CH  | 3.12           |       |                                         |
| Gly <sup>8</sup> | $\epsilon$ NH  | 7.76  |                                         |
|                  | NH             | 7.80  |                                         |
|                  | $\alpha'$ CH   | 3.98  |                                         |
|                  | $\alpha''$ CH  | 3.89  |                                         |

**R<sup>2</sup>E<sup>1</sup>Rf<sub>z</sub><sup>2</sup>FK<sup>1</sup>GBGGK<sub>(biot)</sub> (28x)**MBA118ClAc\_f14  
10'

22.03.2013 13:06:23

RT: 0.00 - 10.00

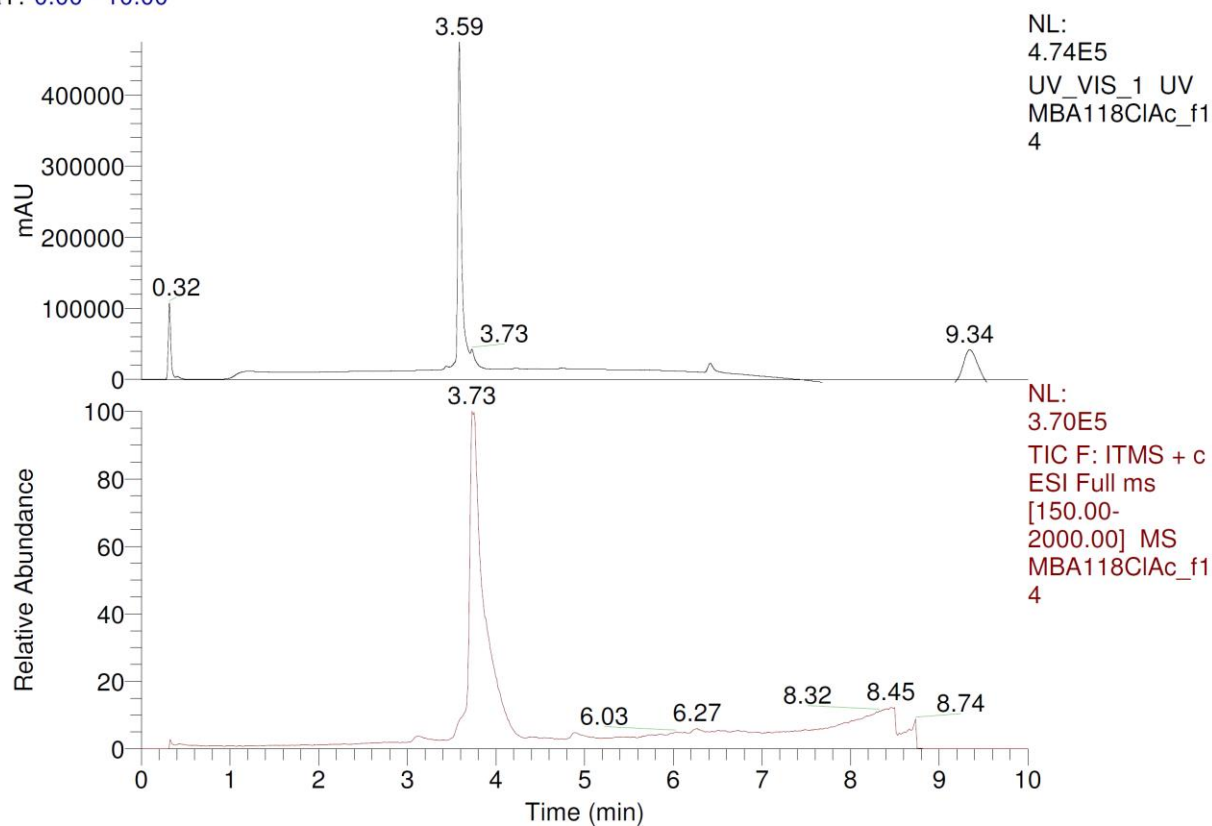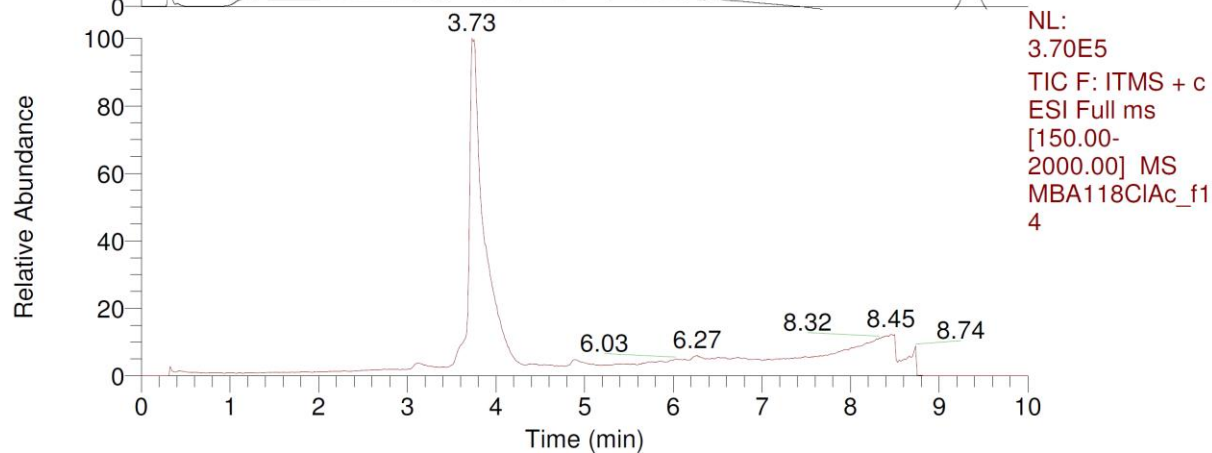MBA118ClAc\_f14 #194-229 RT: 3.65-4.09 AV: 36 NL: 5.98E4  
F: ITMS + c ESI Full ms [150.00-2000.00]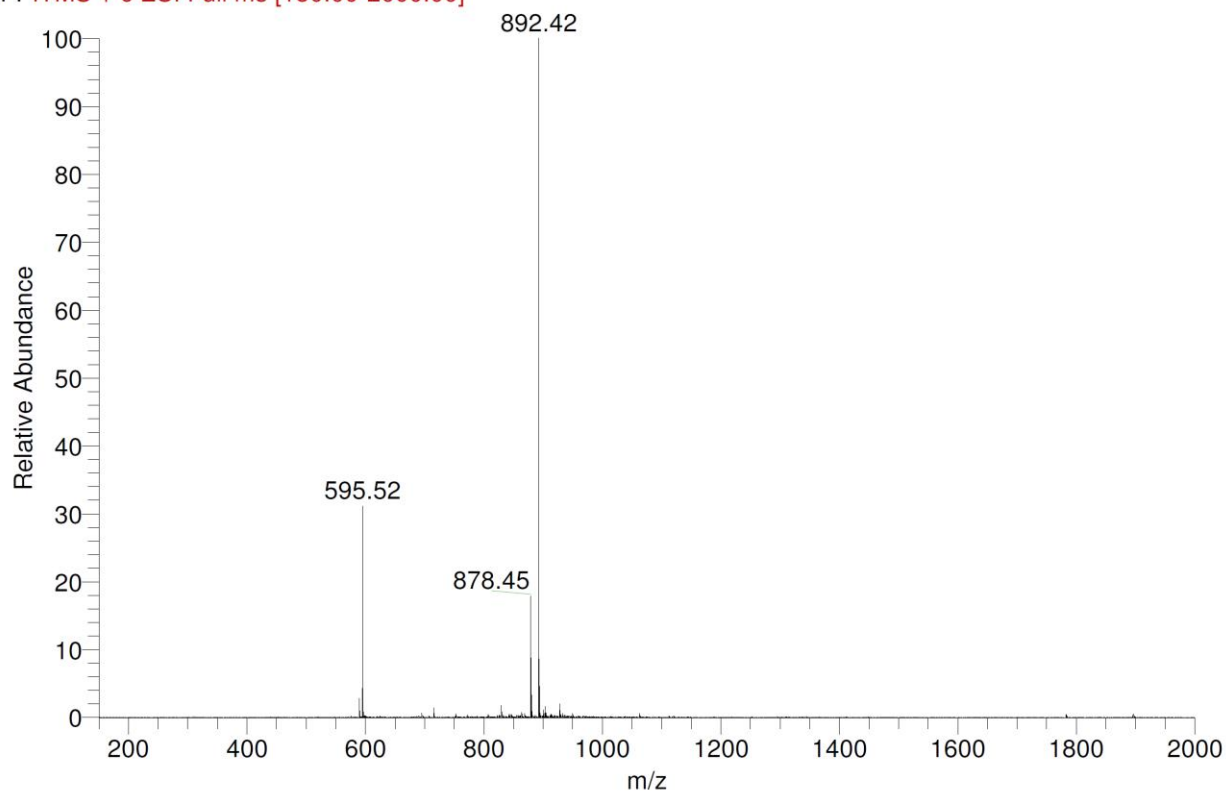

**R<sup>2</sup>E<sup>1</sup>Rf<sub>z</sub><sup>2</sup>FK<sup>1</sup>GFGGK<sub>(biot)</sub> (28s)**\\130.92.134.128\marco\LCMS\MBA118B\_f19  
10'

03.06.2013 11:41:01

RT: 0.00 - 10.00

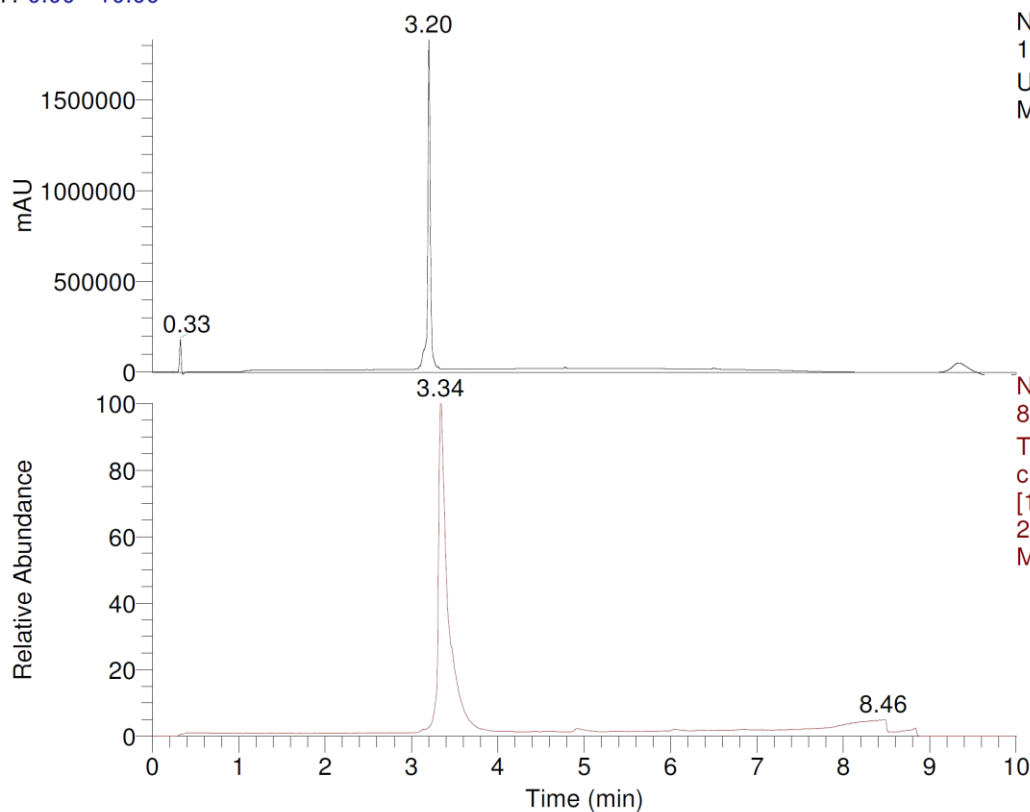NL:  
1.83E6  
UV\_VIS\_1 UV  
MBA118B\_f19NL:  
8.34E5  
TIC F: ITMS +  
c ESI Full ms  
[150.00-  
2000.00] MS  
MBA118B\_f19MBA118B\_f19 #173-201 RT: 3.26-3.60 AV: 29 NL: 1.45E5  
F: ITMS + c ESI Full ms [150.00-2000.00]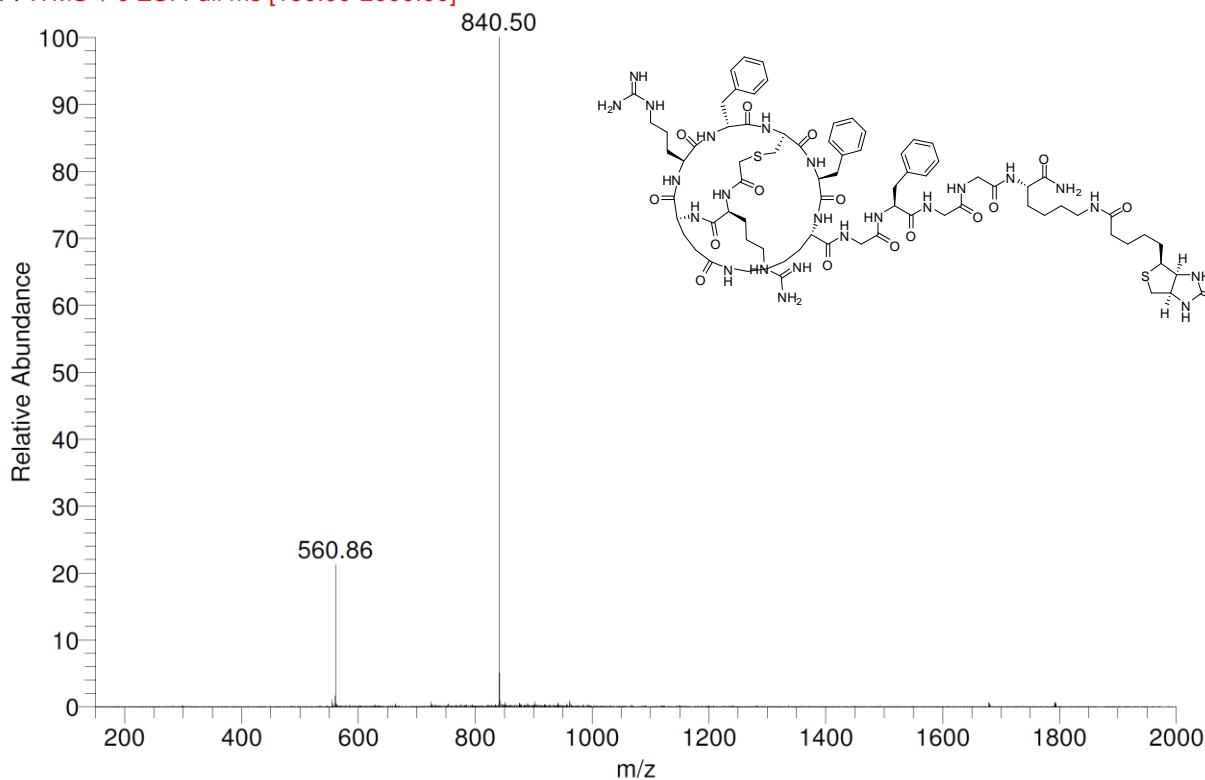

**R<sup>2</sup>E<sup>1</sup>Rf<sup>2</sup>FK<sup>1</sup>G (28c)**MBA118A\_CIAc\_f4  
10'

25.03.2013 20:38:54

RT: 0.00 - 10.00

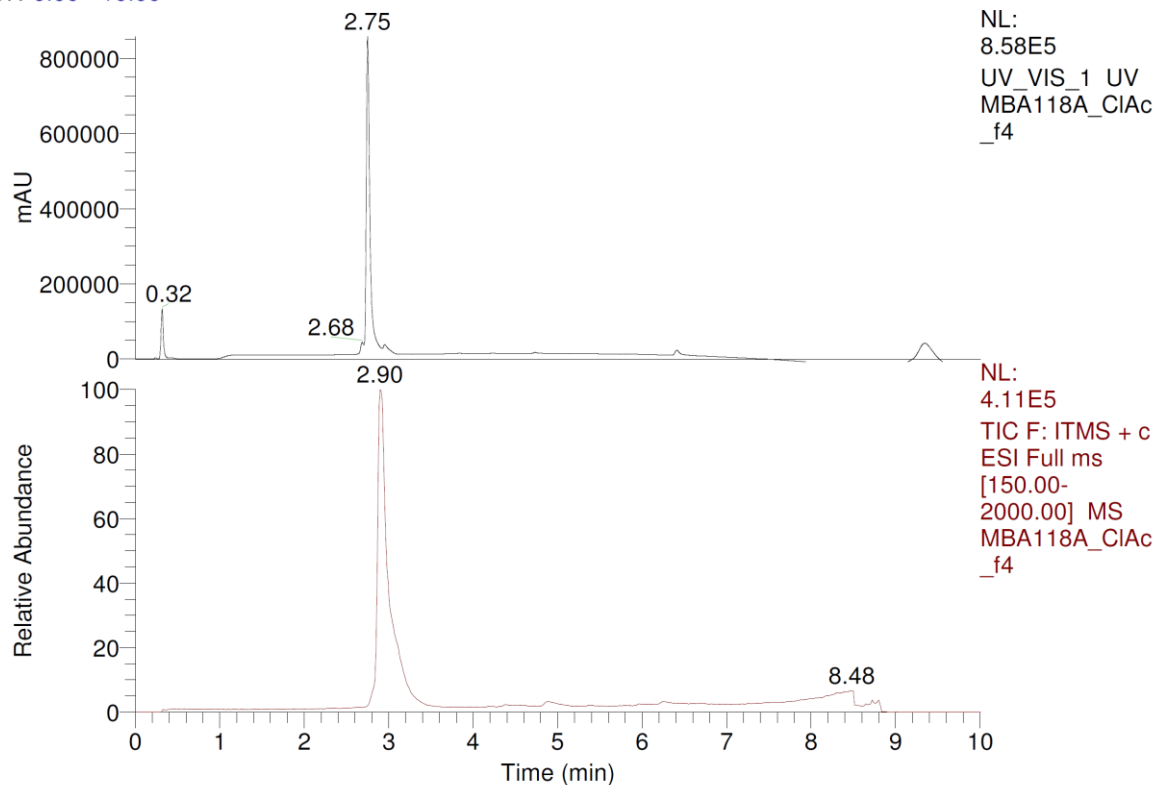

MBA118A\_CIAc\_f4 #148-169 RT: 2.80-3.07 AV: 22 NL: 1.11E5

F: ITMS + c ESI Full ms [150.00-2000.00]

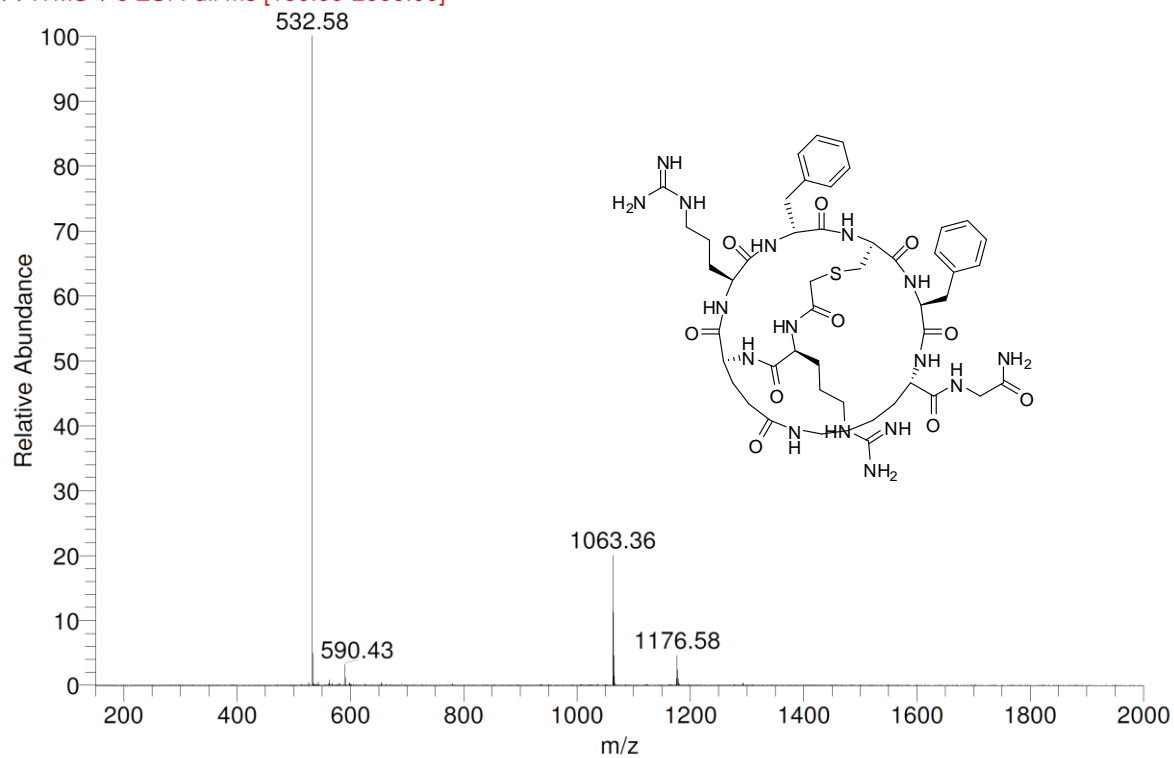

**E<sup>2</sup>E<sup>1</sup>E<sub>2</sub><sup>2</sup>FK<sup>1</sup>GBGGK<sub>(biot)</sub> (29x)**

MBA117CIAc\_f10

22.03.2013 15:31:18

10'

RT: 0.00 - 10.00

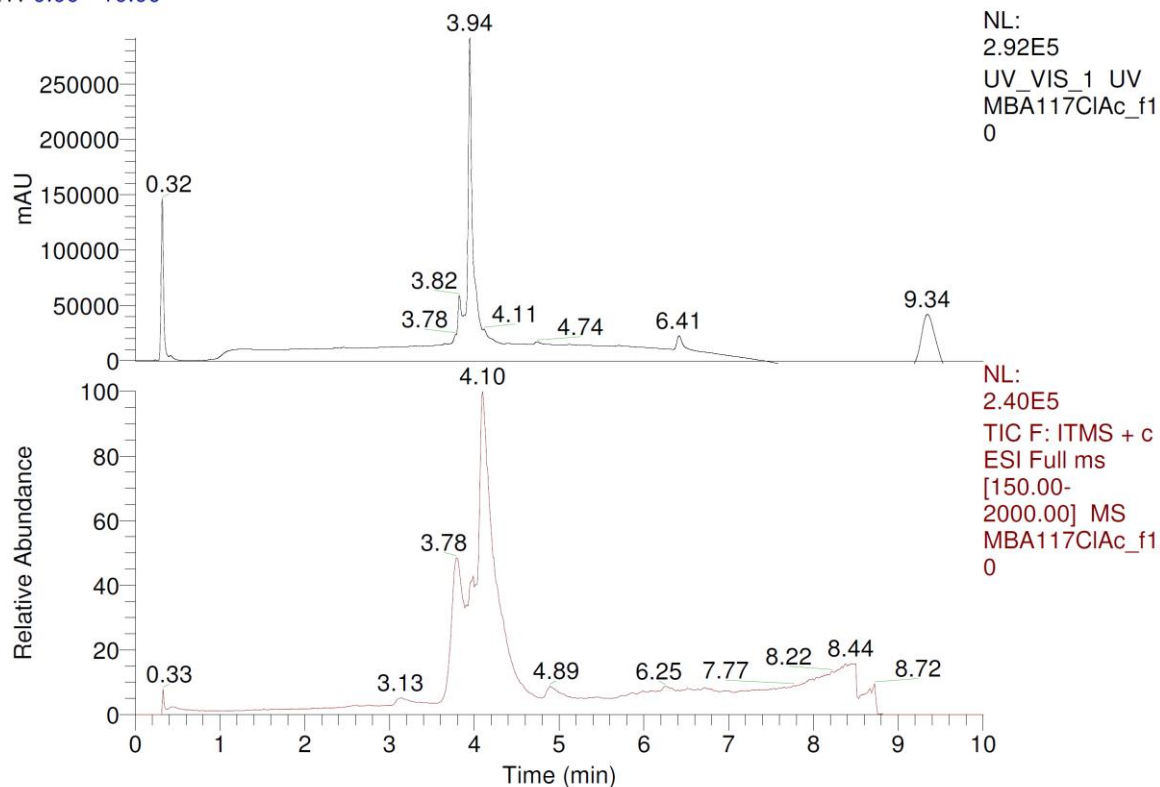

MBA117CIAc\_f10 #185-264 RT: 3.51-4.59 AV: 80 NL: 1.19E4

F: ITMS + c ESI Full ms [150.00-2000.00]

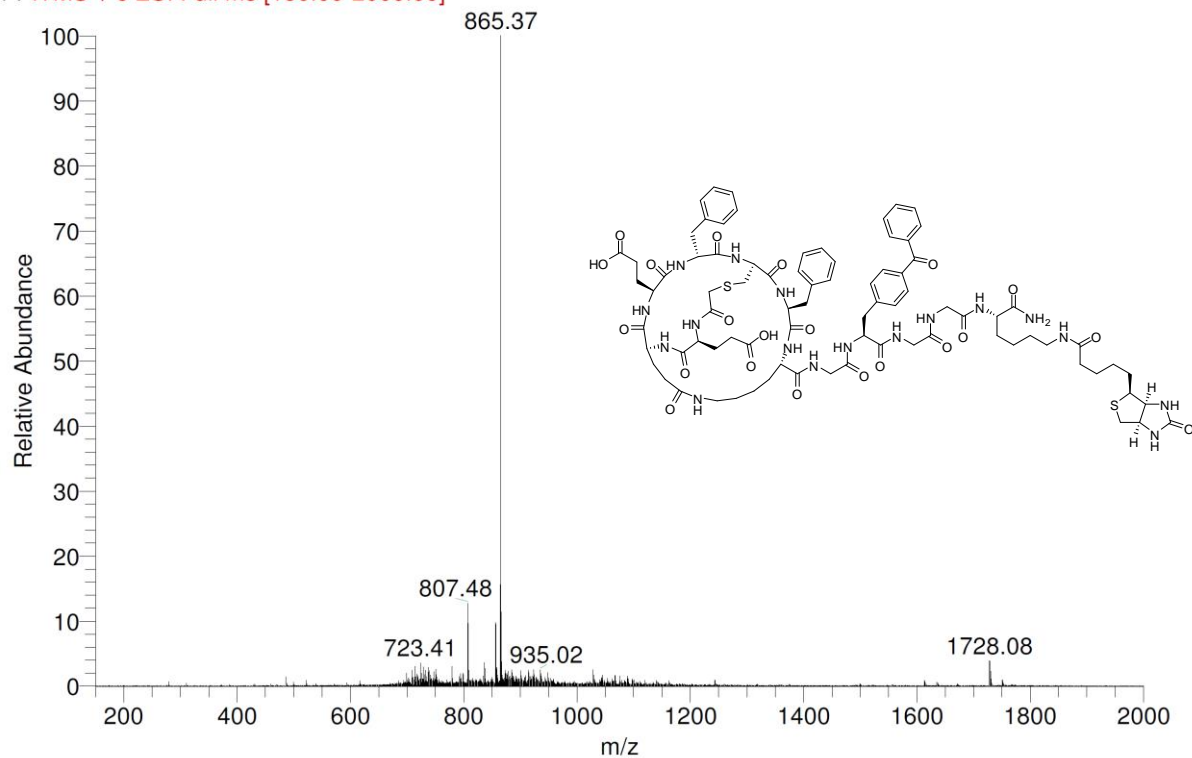



**E<sup>2</sup>E<sup>1</sup>Ef<sub>z</sub><sup>2</sup>FK<sup>1</sup>GFGGK<sub>(biot)</sub> (29s)**\\130.92.134.128\marco\LCMS\MBA117B\_f18  
10'

31.05.2013 15:34:57

RT: 0.00 - 10.00

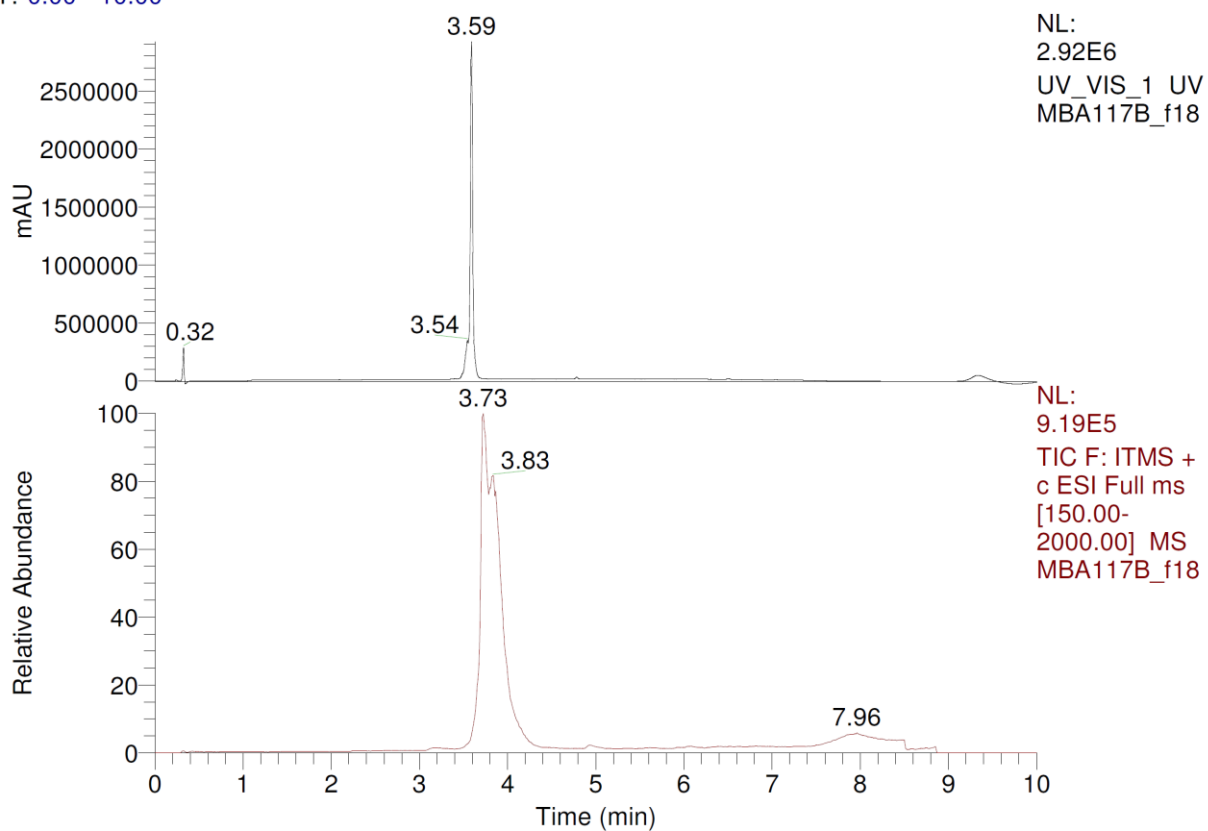MBA117B\_f18 #187-230 RT: 3.54-4.07 AV: 44 NL: 7.62E4  
F: ITMS + c ESI Full ms [150.00-2000.00]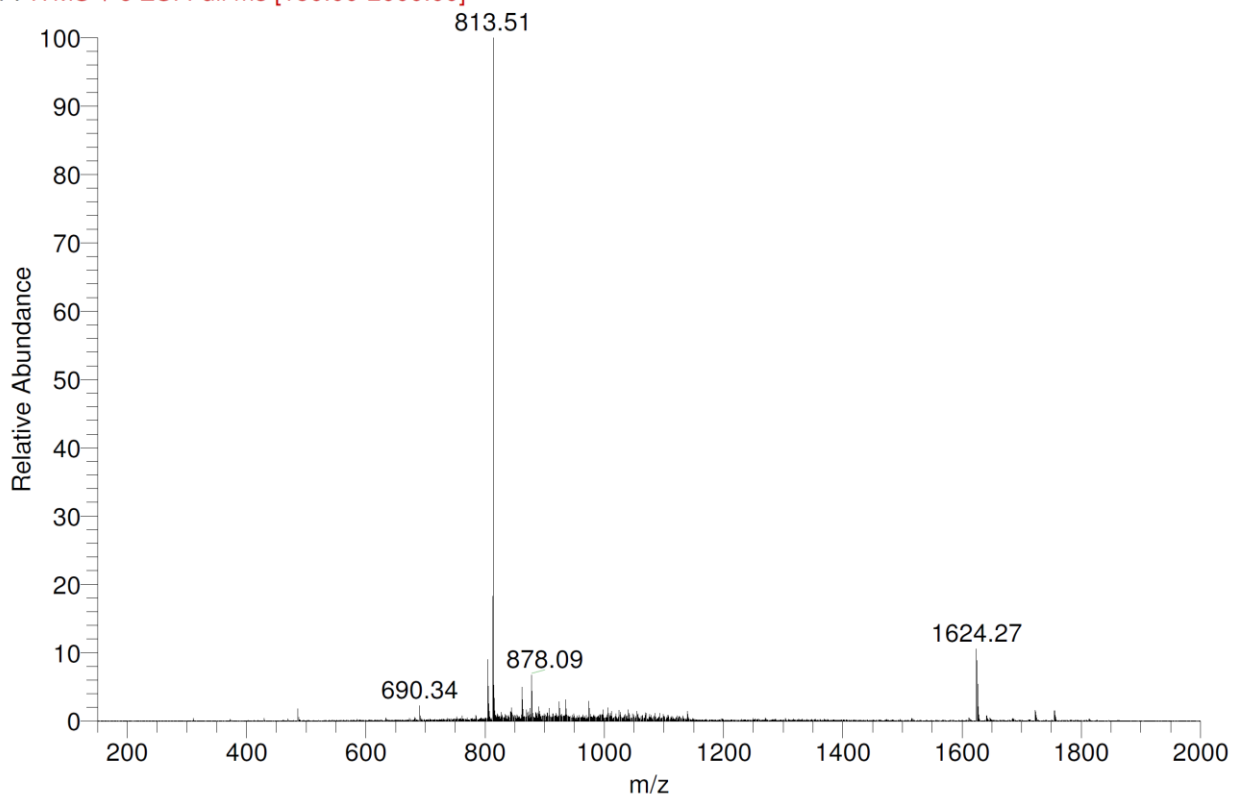

**E<sup>2</sup>E<sup>1</sup>E<sub>z</sub><sup>2</sup>FK<sup>1</sup>G (29c)**MBA117A\_CIAc\_f6  
10'

25.03.2013 12:19:07

RT: 0.00 - 10.00

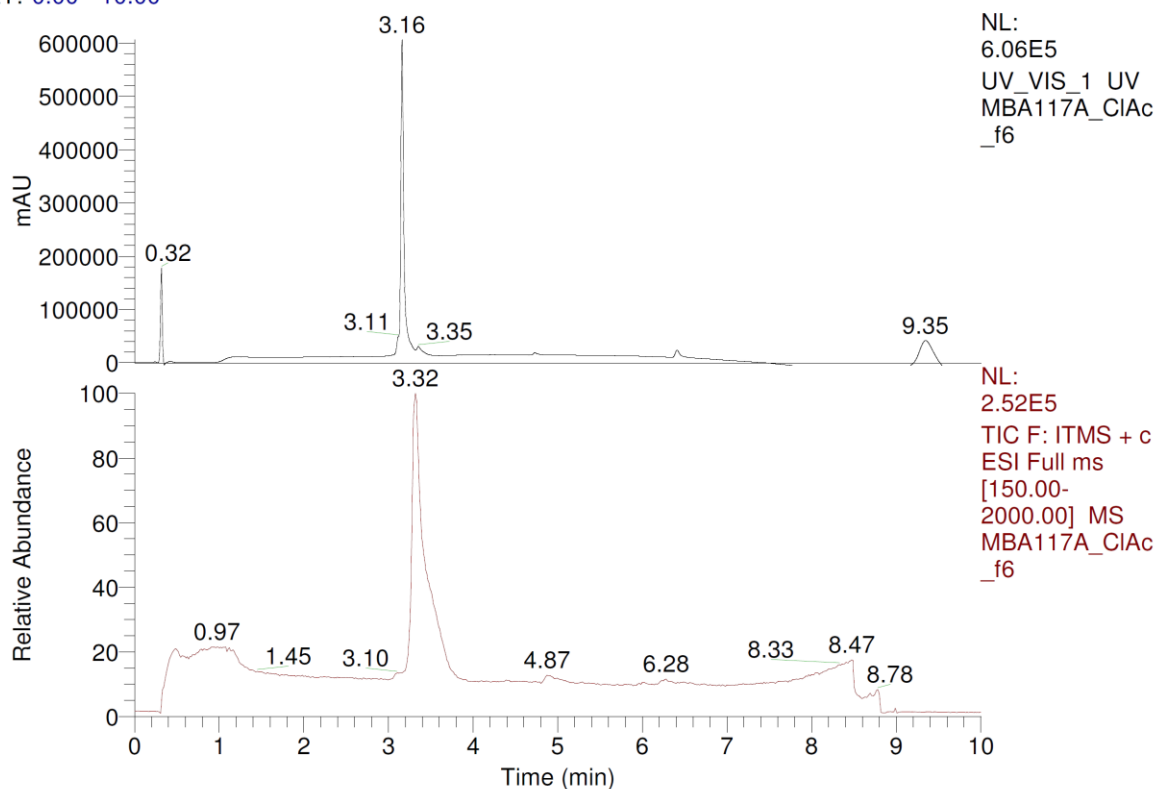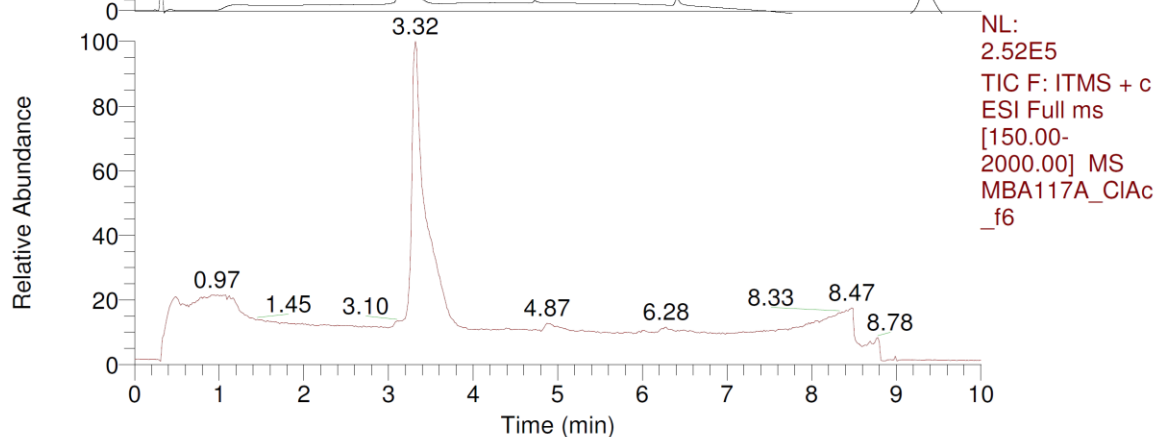

MBA117A\_CIAc\_f6 #188-227 RT: 3.17-3.67 AV: 40 NL: 2.50E4

F: ITMS + c ESI Full ms [150.00-2000.00]

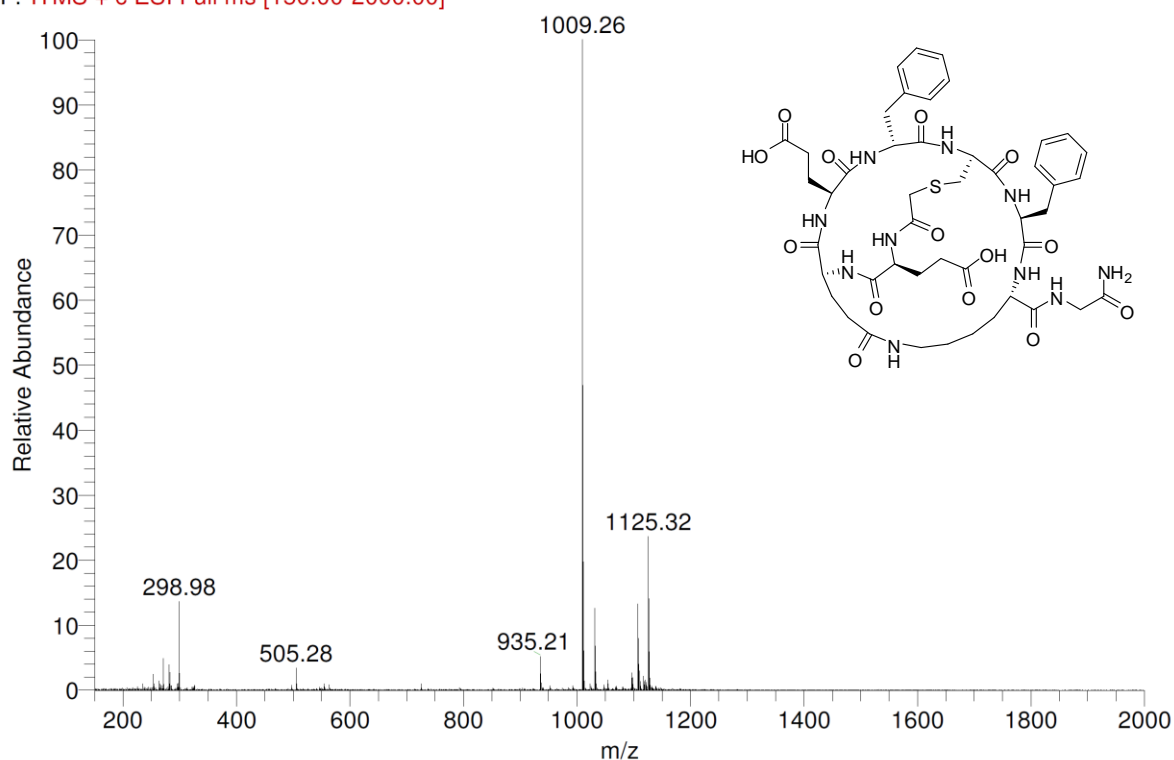

Me<sup>1</sup>Gk<sup>2</sup>fPE<sup>1</sup>a<sup>2</sup> (30).

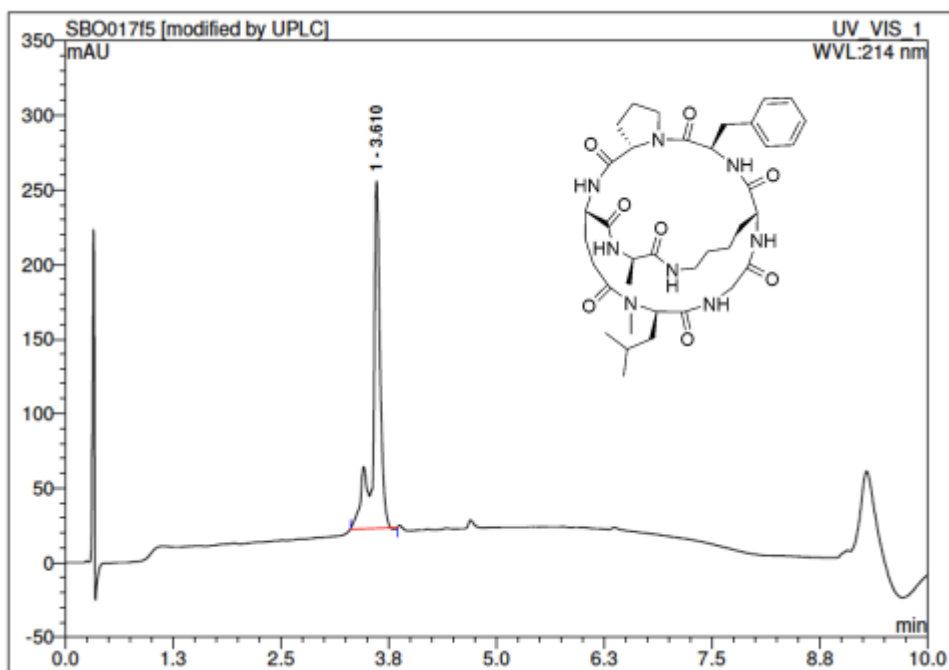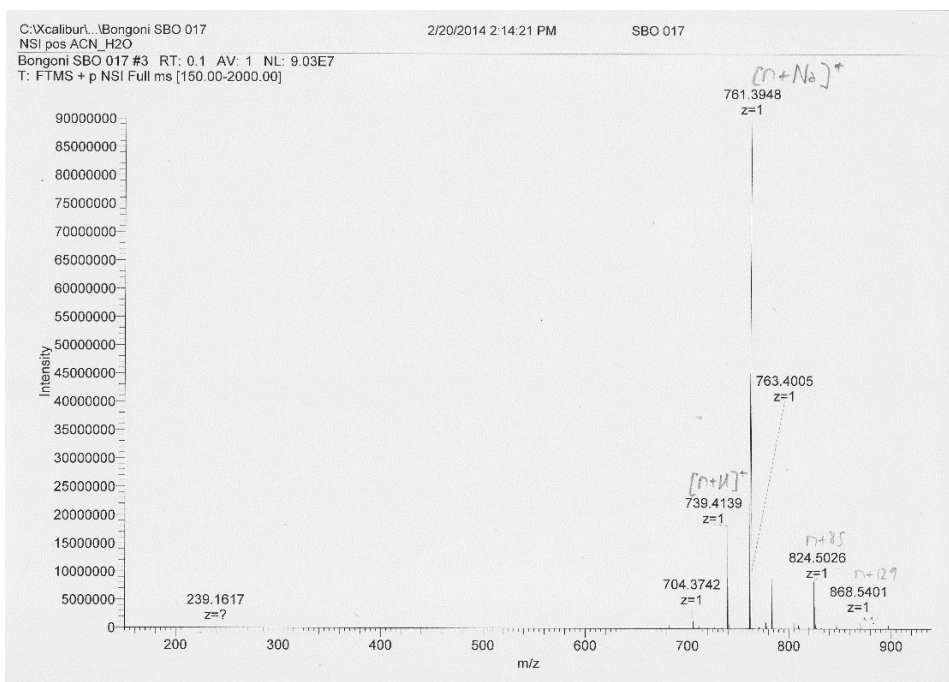

$I^1_{Me}Gk^2fPE^1a^2(31)$ 
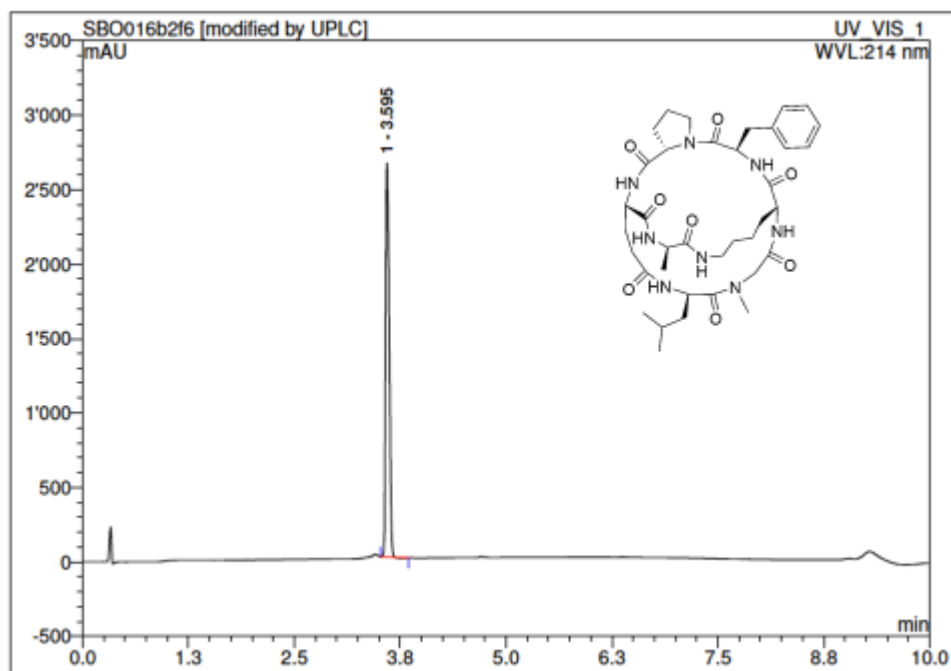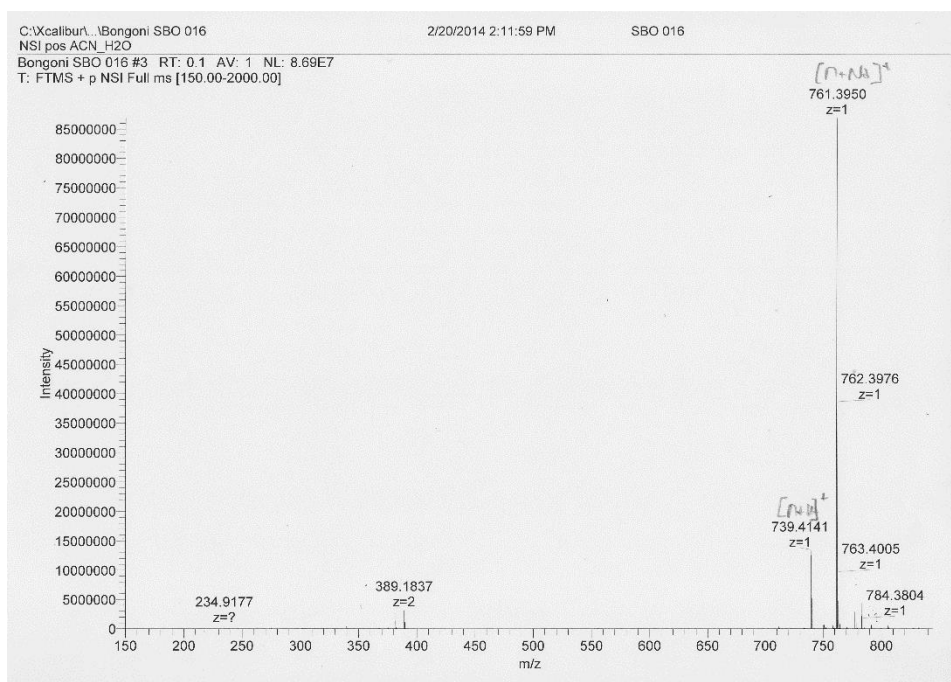

$1^1Gk^2_{Me}fPE^1a^2$  (32).

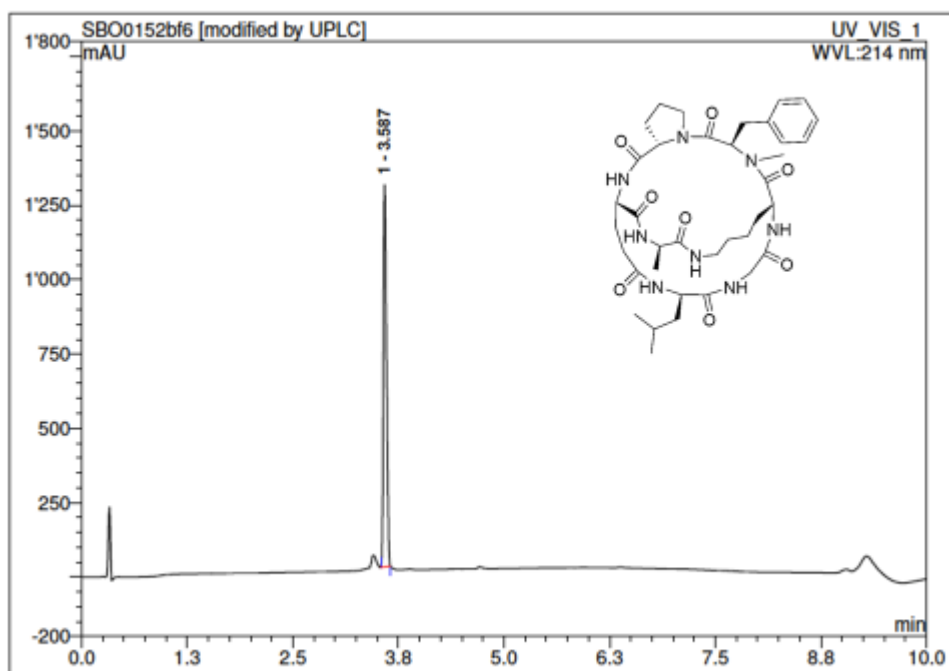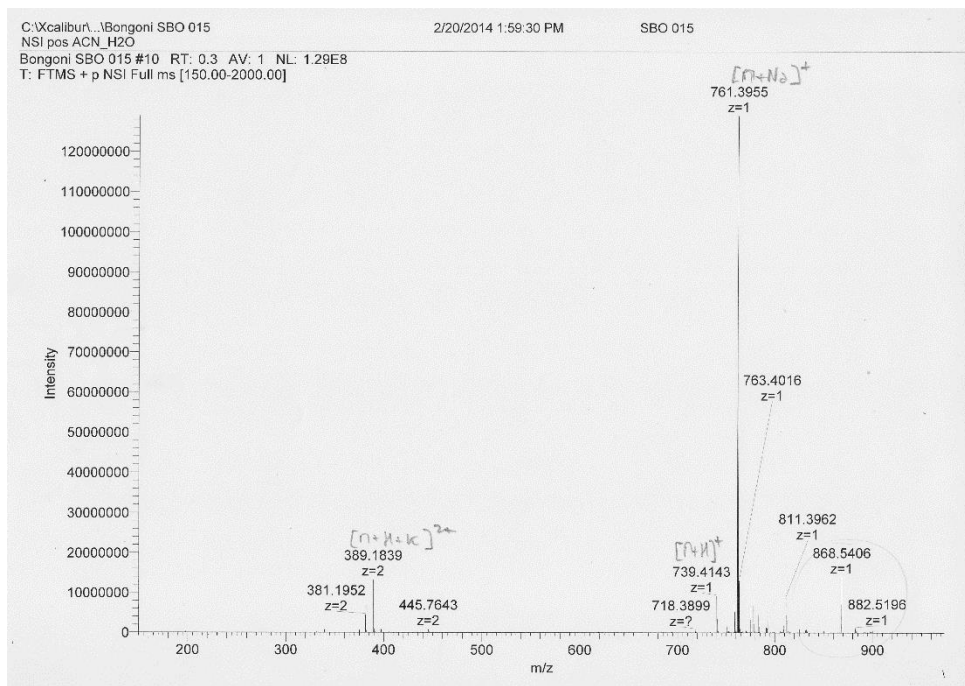

Me<sup>1</sup>Me<sup>2</sup>Gk<sup>2</sup>fPE<sup>1</sup>a<sup>2</sup> (33).

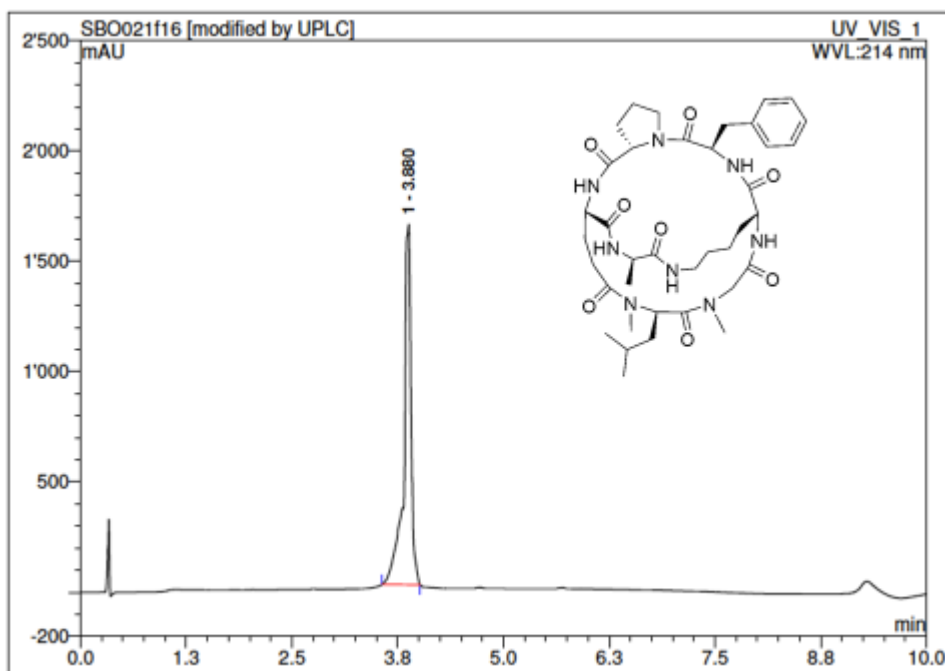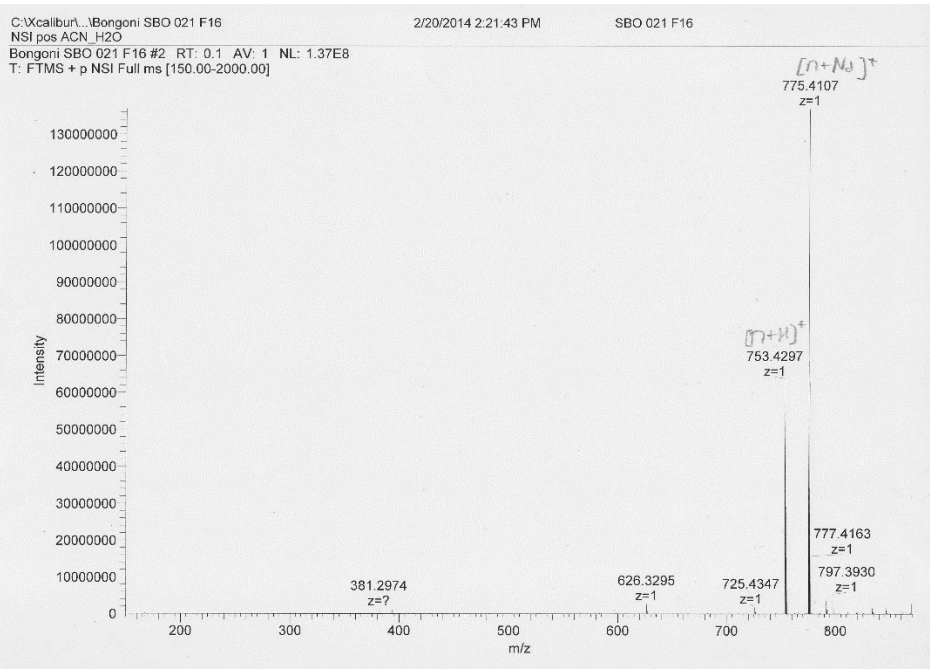

$\text{Me}^1\text{Gk}^2\text{Me}^1\text{PE}^1\text{a}^2$  (34).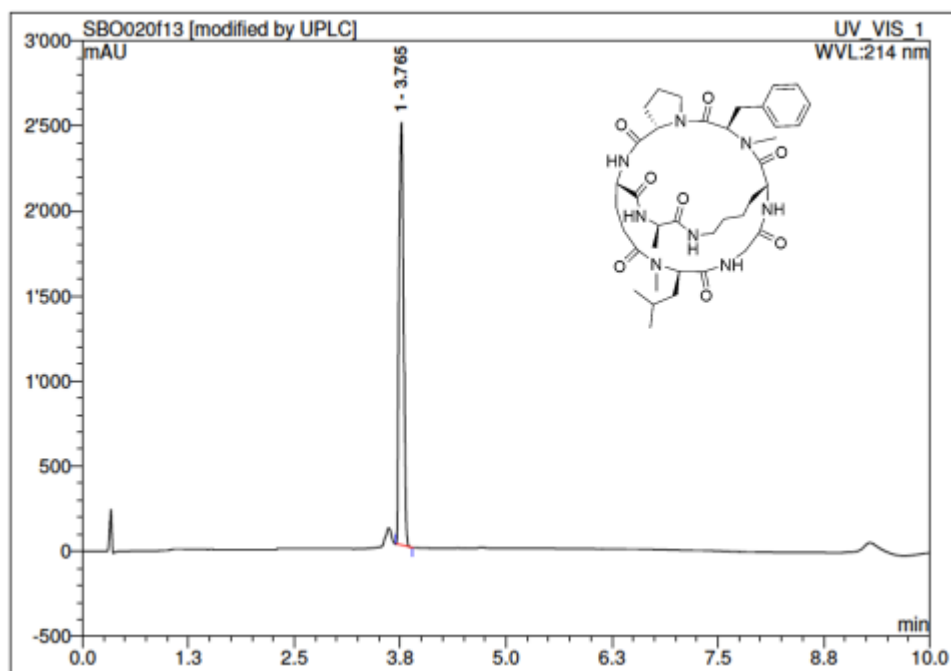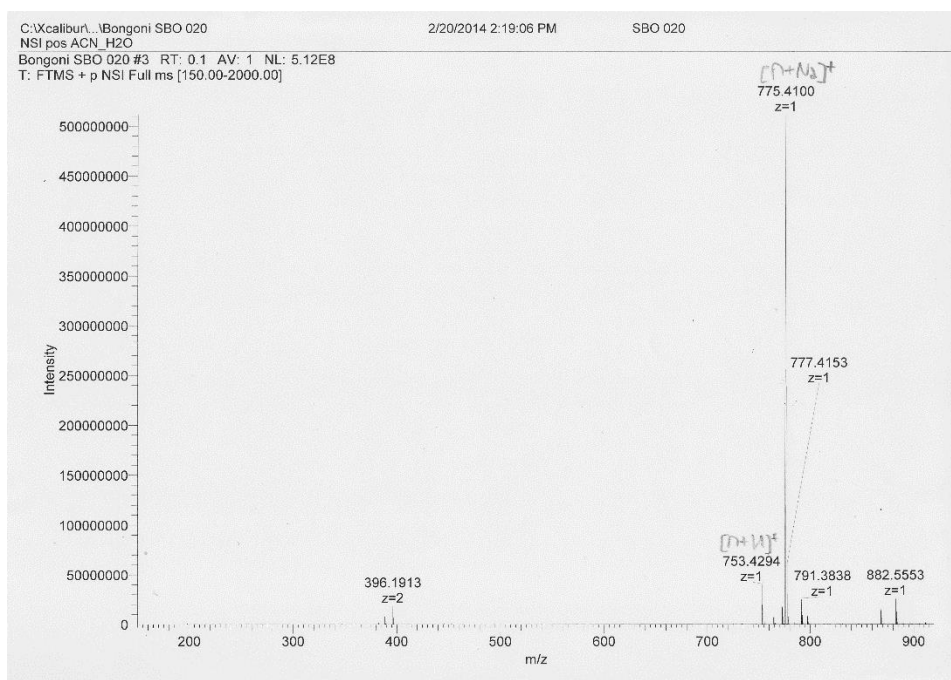

$I^1_{Me}Gk^2_{Me}fPE^1a^2$  (35).
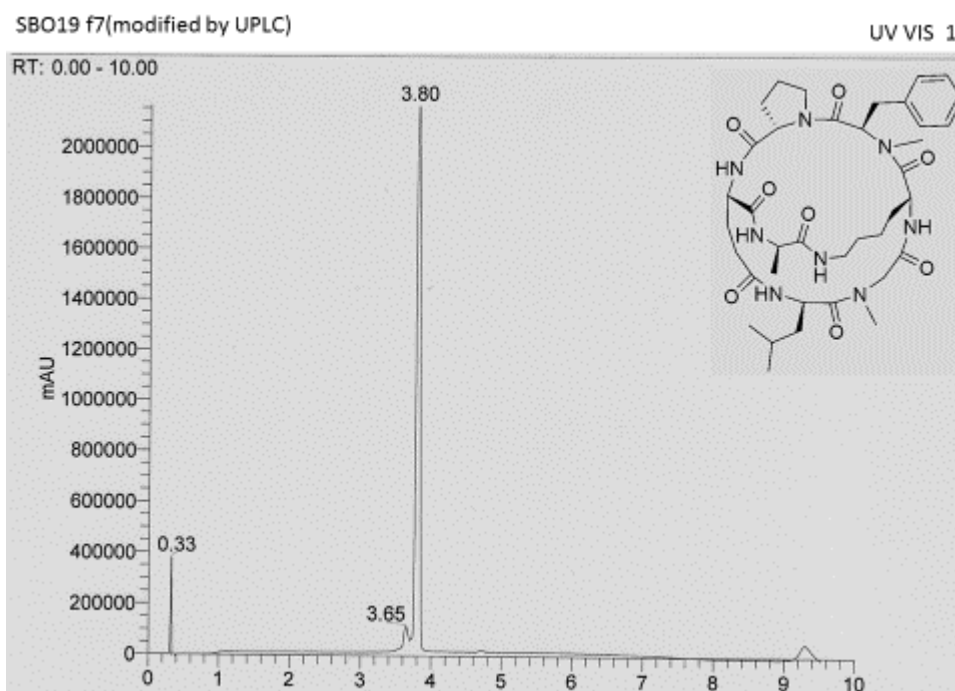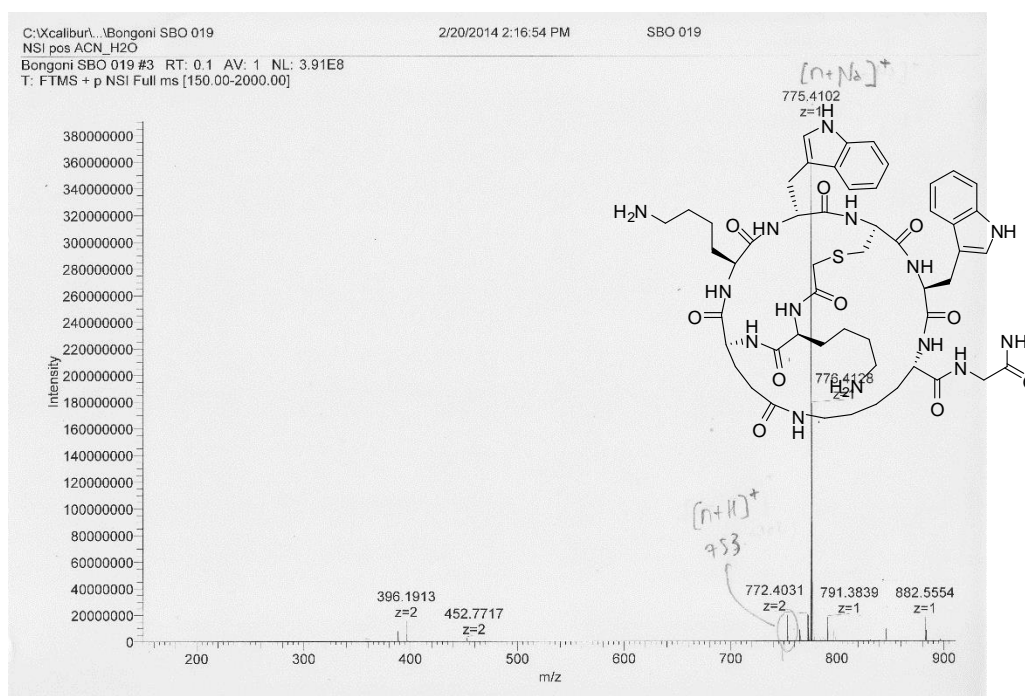

Supplement: SC-006-C5SC01699A-s001.pdf [file SC-006-C5SC01699A-s001.pdf]
